# Supplementary material for: Nanoscale dual-enzyme cascade metal–organic frameworks through biomimetic mineralization as ROS generators for synergistic cancer therapy
Source: Royal Society of Chemistry journal article supplement (doi:10.1039/d0tb00357c), 2020-01-01
Supplement: d0tb00357c2.xlsx [file d0tb00357c2.xlsx]

## Sheet: all
rowname	baseMean	log2FoldChange	lfcSE	stat	pvalue	padj	broadClass	geneBiotype	geneID	geneName	control1	control2	control3	GoxPdZIF1	GoxPdZIF2	GoxPdZIF3	GoxZIF1	GoxZIF2	GoxZIF3	PdZIF1	PdZIF2	PdZIF3	ZIF1	ZIF2	ZIF3
ENSG00000000003	130.849	-0.100516	0.150754	-0.668218	0.503995	0.785481	coding	protein_coding	ENSG00000000003	TSPAN6	131.788	130.1	142.081	124.232	131.308	115.527	113.062	152.405	138.723	136.164	95.3604	134.43	138.565	159.395	119.6
ENSG00000000005	0						coding	protein_coding	ENSG00000000005	TNMD	0	0	0	0	0	0	0	0	0	0	0	0	0	0	0
ENSG00000000419	154.643	0.0221559	0.156767	0.142149	0.886963	0.967405	coding	protein_coding	ENSG00000000419	DPM1	159.7	138.702	166.265	143.787	164.656	165.038	149.189	163.291	93.0673	139.655	196.5	154.98	166.761	150.609	167.44
ENSG00000000457	32.7834	-0.103096	0.222686	-0.461889	0.644161	0.869134	coding	protein_coding	ENSG00000000457	SCYL3	29.6379	36.5572	41.3143	34.5088	27.0953	33.0076	43.4856	22.6794	26.3398	41.8965	26.0074	34.2497	32.2244	46.4378	16.3091
ENSG00000000460	113.433	-0.086936	0.200119	-0.436713	0.66232	0.879031	coding	protein_coding	ENSG00000000460	C1orf112	93.8055	111.822	139.058	63.2661	109.076	141.933	83.6261	117.025	119.407	139.655	135.816	115.593	103.118	138.058	90.2436
ENSG00000000938	0						coding	protein_coding	ENSG00000000938	FGR	0	0	0	0	0	0	0	0	0	0	0	0	0	0	0
ENSG00000000971	147.656	-0.206918	0.171055	-1.20777	0.227137	0.545598	coding	protein_coding	ENSG00000000971	CFH	153.657	149.454	187.426	124.232	158.403	126.529	194.682	155.127	140.479	202.5	115.588	160.974	133.731	114.212	97.8545
ENSG00000001036	403.154	-0.0835979	0.131964	-0.633453	0.526438	0.802817	coding	protein_coding	ENSG00000001036	FUCA2	397.091	455.889	391.982	379.596	402.955	381.788	379.997	407.321	467.092	310.733	499.919	363.903	442.28	367.737	399.029
ENSG00000001084	601.126	-0.584732	0.131355	-4.4398	9.00441e-06	0.000235257	coding	protein_coding	ENSG00000001084	GCLC	937.48	809.634	793.032	446.313	603.044	577.633	596.087	530.697	446.021	495.776	410.338	577.107	579.234	626.282	588.215
ENSG00000001167	167.366	-0.224209	0.12164	-1.84881	0.0644851	0.266743	coding	protein_coding	ENSG00000001167	NFYA	163.44	177.41	183.395	139.185	157.014	139.732	173.942	164.199	175.599	181.552	150.265	190.086	175.623	169.435	169.615
ENSG00000001460	34.0667	-0.00570115	0.216991	-0.028862	0.976975	0.995653	coding	protein_coding	ENSG00000001460	STPG1	43.1621	23.6546	31.2376	35.6591	31.2638	34.1078	34.7885	61.6878	38.6317	33.75	23.1177	39.3871	24.1683	31.3769	25.0073
ENSG00000001461	67.4254	-0.0163192	0.22288	-0.0716307	0.942896	0.987483	coding	protein_coding	ENSG00000001461	NIPAL3	57.2617	59.1366	95.7282	73.6187	63.2223	70.4162	68.9079	60.7807	38.6317	150.129	37.5662	62.5057	57.1983	56.4784	59.8
ENSG00000001497	398.397	-0.0384445	0.108787	-0.355081	0.722529	0.905072	coding	protein_coding	ENSG00000001497	LAS1L	391.048	380.625	395.005	384.198	416.85	328.976	398.729	471.731	398.609	384.051	416.118	389.59	444.697	410.41	365.324
ENSG00000001561	4.99415	0.0128444	0.196442	0.0646757	0.948432	0.988483	coding	protein_coding	ENSG00000001561	ENPP4	3.74071	4.30084	6.04599	5.75146	4.1685	4.40101	6.02108	4.53587	3.51197	1.16379	14.4485	3.42497	4.02805	5.0203	4.34909
ENSG00000001617	21.7344	-0.0708447	0.225388	-0.309015	0.75731	0.920681	coding	protein_coding	ENSG00000001617	SEMA3F	22.732	23.6546	25.1916	29.9076	8.33701	27.5063	22.0773	22.6794	21.0718	10.4741	17.3382	29.9685	30.6132	13.8058	20.6582
ENSG00000001626	1.08306	-0.0108667	0.0622008	-0.374657	0.707915		coding	protein_coding	ENSG00000001626	CFTR	0.287747	0	1.00767	0	0	0	0	0	0	0	0	0	13.6954	1.25508	0
ENSG00000001629	370.456	-0.0484338	0.13482	-0.355153	0.722475	0.905072	coding	protein_coding	ENSG00000001629	ANKIB1	405.436	477.394	371.828	445.163	377.944	386.189	350.561	331.119	352.953	251.379	190.721	278.279	439.058	525.876	372.935
ENSG00000001630	429.737	0.112268	0.112437	0.998715	0.317933	0.63942	coding	protein_coding	ENSG00000001630	CYP51A1	425.866	412.881	417.173	455.516	525.232	379.587	418.799	432.722	393.341	450.388	407.449	454.665	384.276	470.653	417.513
ENSG00000001631	168.215	-0.229633	0.165955	-1.38854	0.164974	0.46166	coding	protein_coding	ENSG00000001631	KRIT1	149.628	221.493	159.211	109.278	138.255	187.043	157.886	161.477	159.795	165.259	210.949	181.523	174.012	183.241	164.178
ENSG00000002016	54.1703	-0.330552	0.226303	-1.44519	0.148405	0.434657	coding	protein_coding	ENSG00000002016	RAD52	54.0965	33.3315	120.92	39.1099	56.2748	35.2081	76.936	33.5654	80.7754	30.2586	72.2427	54.7995	44.3086	42.6726	38.0545
ENSG00000002079	3.93764	0.120368	0.145081	1.11601	0.264418		pseudo	pseudogene	ENSG00000002079	MYH16	1.15099	2.15042	1.00767	1.15029	4.86325	5.50126	2.00703	3.6287	7.02395	25.6034	0	0.856242	1.61122	2.51015	0
ENSG00000002330	84.2522	-0.132687	0.158223	-0.834411	0.404049	0.712625	coding	protein_coding	ENSG00000002330	BAD	91.7913	95.6938	83.6362	67.8672	81.2858	94.6217	84.2951	73.4811	86.0433	69.8275	89.5809	89.9054	82.1722	86.6002	86.9818
ENSG00000002549	162.107	-0.0426923	0.14392	-0.302584	0.762207	0.922776	coding	protein_coding	ENSG00000002549	LAP3	166.606	133.326	159.211	164.492	152.15	130.93	173.273	161.477	180.867	215.302	164.713	159.261	171.595	158.139	140.258
ENSG00000002586	519.982	0.3213	0.101488	3.16652	0.00154275	0.0181817	coding	protein_coding	ENSG00000002586	CD99	436.8	484.92	469.572	622.308	537.737	597.437	527.848	513.461	574.208	512.069	601.059	440.965	485.783	493.245	502.32
ENSG00000002587	3.32896	0.0363207	0.165631	0.191867	0.847846		coding	protein_coding	ENSG00000002587	HS3ST1	1.43874	7.52647	5.03833	6.90175	4.86325	3.30076	4.01405	3.6287	0	1.16379	0	6.84994	1.61122	2.51015	1.08727
ENSG00000002726	0						coding	protein_coding	ENSG00000002726	AOC1	0	0	0	0	0	0	0	0	0	0	0	0	0	0	0
ENSG00000002745	0						coding	protein_coding	ENSG00000002745	WNT16	0	0	0	0	0	0	0	0	0	0	0	0	0	0	0
ENSG00000002746	73.4249	-0.0931379	0.19283	-0.47686	0.633462	0.863875	coding	protein_coding	ENSG00000002746	HECW1	70.7858	72.0391	100.767	59.8152	70.1698	92.4212	77.605	78.017	77.2634	80.3017	80.9118	68.4994	55.5871	38.9073	78.2836
ENSG00000002822	67.3574	-0.149142	0.225996	-0.668698	0.503688	0.785481	coding	protein_coding	ENSG00000002822	MAD1L1	85.7486	65.5879	57.4369	41.4105	77.8121	51.7119	52.1827	99.7891	79.0194	77.9741	54.9044	49.6621	53.9759	130.528	32.6182
ENSG00000002834	1745.86	0.0597197	0.0640785	0.931958	0.351358	0.670406	coding	protein_coding	ENSG00000002834	LASP1	1768.21	1682.7	1665.67	1789.85	1854.29	1697.69	1621.01	1792.58	1785.84	1670.04	1751.16	1724.47	1719.17	1773.42	1891.85
ENSG00000002919	47.611	0.107212	0.211607	0.505602	0.613136	0.855125	coding	protein_coding	ENSG00000002919	SNX11	38.2704	40.858	50.3833	33.3585	47.9378	61.6141	44.8236	58.0591	47.4116	43.0603	43.3456	68.4994	60.4208	32.632	43.4909
ENSG00000002933	0						coding	protein_coding	ENSG00000002933	TMEM176A	0	0	0	0	0	0	0	0	0	0	0	0	0	0	0
ENSG00000003056	554.738	0.0155752	0.104096	0.14905	0.881515	0.965727	coding	protein_coding	ENSG00000003056	M6PR	545.281	510.725	564.292	565.944	609.991	458.805	554.608	555.191	619.863	608.663	586.611	527.445	510.757	539.682	563.207
ENSG00000003096	1.6842	-0.013884	0.133335	-0.0838939	0.933141		coding	protein_coding	ENSG00000003096	KLHL13	2.58972	1.07521	2.01533	0	2.08425	3.30076	1.33802	0	3.51197	4.65517	0	1.71248	0.80561	0	2.17455
ENSG00000003137	112.351	0.20754	0.207097	1.00253	0.316089	0.637945	coding	protein_coding	ENSG00000003137	CYP26B1	108.481	96.769	83.6362	149.538	99.3493	108.925	92.3232	58.0591	124.675	169.914	225.397	101.037	87.8115	89.1103	90.2436
ENSG00000003147	25.3775	0.123874	0.225391	0.536148	0.591856	0.840953	coding	protein_coding	ENSG00000003147	ICA1	17.2648	47.3093	16.1226	21.8555	31.9585	40.7093	40.1405	35.3798	14.0479	19.7845	20.228	29.1122	11.2785	21.3363	14.1345
ENSG00000003249	154.942	-0.163518	0.141419	-1.15408	0.248466	0.568068	coding	protein_coding	ENSG00000003249	DBNDD1	161.138	149.454	192.464	135.734	162.572	140.832	127.112	160.57	175.599	138.491	132.927	148.986	161.122	163.16	173.964
ENSG00000003393	108.221	0.279396	0.219329	1.25209	0.210535	0.525341	coding	protein_coding	ENSG00000003393	ALS2	79.4182	101.07	138.05	95.4742	154.929	178.241	99.0133	111.582	93.0673	54.6982	118.478	85.6242	64.4488	164.415	84.8073
ENSG00000003400	24.0125	0.222727	0.213292	0.964928	0.334581	0.655358	coding	protein_coding	ENSG00000003400	CASP10	29.6379	34.4067	7.05366	64.4164	11.116	35.2081	33.4504	12.7004	19.3158	11.6379	5.77942	9.41867	37.8637	18.8261	29.3564
ENSG00000003402	1014.59	0.444377	0.113086	3.92988	8.49898e-05	0.00163723	coding	protein_coding	ENSG00000003402	CFLAR	734.906	996.72	843.416	1088.18	1296.4	1178.37	1036.96	990.634	1115.05	1187.07	1034.52	962.416	988.484	853.451	912.222
ENSG00000003436	260.676	0.481761	0.148143	3.24867	0.00115948	0.0144685	coding	protein_coding	ENSG00000003436	TFPI	237.391	184.936	273.077	348.539	349.46	320.174	240.174	231.329	182.623	229.267	306.309	283.416	268.268	257.29	197.884
ENSG00000003509	39.2293	-0.182039	0.226298	-0.863125	0.388069	0.701201	coding	protein_coding	ENSG00000003509	NDUFAF7	42.8743	37.6324	25.1916	14.9538	35.4323	29.7068	34.1194	30.8439	82.5314	46.5517	26.0074	69.3556	29.002	36.3972	47.84
ENSG00000003756	161.683	0.0814684	0.139205	0.575361	0.565047	0.825727	coding	protein_coding	ENSG00000003756	RBM5	149.916	120.424	141.073	138.035	144.508	160.637	196.689	192.321	228.278	143.146	164.713	186.661	152.26	138.058	168.527
ENSG00000003987	0.231013	-0.0077184	0.0420033	-0.164938	0.868993		coding	protein_coding	ENSG00000003987	MTMR7	0.575494	0	0	0	0	0	0	0	0	0	2.88971	0	0	0	0
ENSG00000003989	167.197	-0.0279111	0.15133	-0.182134	0.855477	0.95687	coding	protein_coding	ENSG00000003989	SLC7A2	180.705	178.485	165.257	202.451	179.246	132.03	201.372	149.684	168.575	169.914	141.596	141.28	182.068	154.374	160.916
ENSG00000004059	165.124	0.109278	0.124802	0.878092	0.379894	0.69475	coding	protein_coding	ENSG00000004059	ARF5	162.577	150.529	180.372	178.295	177.161	180.441	167.921	156.941	152.771	160.603	147.375	185.805	148.232	150.609	177.225
ENSG00000004139	104.68	-0.389219	0.205783	-1.90962	0.0561819	0.244943	coding	protein_coding	ENSG00000004139	SARM1	121.429	140.853	77.5902	64.4164	86.8438	79.2182	143.168	157.848	70.2395	64.0086	89.5809	83.0555	110.369	154.374	127.211
ENSG00000004142	387.662	-0.0834974	0.0956829	-0.872128	0.383139	0.69755	coding	protein_coding	ENSG00000004142	POLDIP2	385.869	429.009	399.035	391.099	386.281	358.682	365.948	403.692	438.997	370.086	349.655	413.565	380.248	375.267	367.498
ENSG00000004399	511.244	-0.158947	0.145907	-1.09086	0.275336	0.595623	coding	protein_coding	ENSG00000004399	PLXND1	533.771	511.8	516.932	490.024	491.189	397.191	648.269	529.79	424.949	410.819	520.147	466.652	628.376	451.827	646.927
ENSG00000004455	328.902	0.01214	0.131239	0.0926696	0.926166	0.981146	coding	protein_coding	ENSG00000004455	AK2	335.801	331.165	319.43	366.943	299.438	333.377	305.737	352.891	351.197	272.327	254.294	352.772	406.833	301.218	350.102
ENSG00000004468	84.9708	-0.0752241	0.218799	-0.365019	0.715097	0.901995	coding	protein_coding	ENSG00000004468	CD38	88.6261	62.3622	68.5212	51.7631	50.7168	101.223	92.3232	57.152	121.163	95.431	80.9118	104.462	145.815	79.0697	75.0218
ENSG00000004478	1154.3	0.304644	0.134978	2.2561	0.0240645	0.140291	coding	protein_coding	ENSG00000004478	FKBP4	1118.47	1011.77	1085.26	1403.36	1351.98	1311.5	1050.34	899.917	888.529	1212.67	1557.55	1020.64	905.506	1321.59	1175.34
ENSG00000004487	468.578	-0.542121	0.120921	-4.48085	7.43459e-06	0.000198998	coding	protein_coding	ENSG00000004487	KDM1A	562.258	562.335	578.4	395.7	400.871	334.477	409.433	447.237	361.733	509.741	606.839	425.552	522.841	480.694	430.56
ENSG00000004534	214.301	-0.014598	0.207701	-0.0683205	0.945531	0.988322	coding	protein_coding	ENSG00000004534	RBM6	261.85	168.808	261.993	227.758	257.058	199.146	200.034	281.224	175.599	222.284	72.2427	218.342	258.601	217.128	192.447
ENSG00000004660	31.7178	-0.674968	0.222738	-3.00208	0.00268141	0.0281885	coding	protein_coding	ENSG00000004660	CAMKK1	38.2704	44.0836	57.4369	27.607	22.232	12.1028	28.0984	25.4009	42.1437	16.2931	11.5588	31.681	33.03	40.1624	45.6655
ENSG00000004700	361.584	0.122823	0.107951	1.13804	0.255105	0.575617	coding	protein_coding	ENSG00000004700	RECQL	330.046	370.948	345.629	388.799	408.513	339.978	343.201	344.726	388.073	370.086	369.883	398.153	376.22	352.676	296.825
ENSG00000004766	79.6899	-0.00478905	0.226161	-0.0350271	0.972058	0.994385	coding	protein_coding	ENSG00000004766	CCDC132	68.4838	34.4067	58.4446	26.4567	87.5386	45.1104	89.6472	143.334	35.1197	112.888	115.588	118.161	104.729	105.426	50.0145
ENSG00000004776	2.57299	0.0686832	0.170713	0.396683	0.691601		coding	protein_coding	ENSG00000004776	HSPB6	3.45296	3.22563	1.00767	4.60117	2.779	3.30076	0.669009	3.6287	3.51197	1.16379	2.88971	1.71248	3.22244	1.25508	2.17455
ENSG00000004777	37.0196	0.0739118	0.219283	0.347088	0.728525	0.907337	coding	protein_coding	ENSG00000004777	ARHGAP33	44.6008	21.5042	20.1533	18.4047	43.7693	38.5088	104.365	29.9367	17.5599	20.9483	57.7942	35.1059	30.6132	42.6726	29.3564
ENSG00000004779	142.66	0.18058	0.13635	1.31905	0.187154	0.491321	coding	protein_coding	ENSG00000004779	NDUFAB1	124.019	134.401	107.82	146.087	132.697	144.133	140.492	159.663	158.039	143.146	167.603	127.58	137.759	163.16	153.305
ENSG00000004799	108.274	-0.602058	0.198736	-3.02633	0.00247541	0.0264335	coding	protein_coding	ENSG00000004799	PDK4	132.651	166.658	125.958	66.7169	76.4226	97.9225	92.9922	146.055	77.2634	110.56	66.4633	105.318	104.729	154.374	100.029
ENSG00000004809	0						coding	protein_coding	ENSG00000004809	SLC22A16	0	0	0	0	0	0	0	0	0	0	0	0	0	0	0
ENSG00000004838	1.80415	-0.13416	0.139941	-0.801808	0.422664		coding	protein_coding	ENSG00000004838	ZMYND10	5.46719	1.07521	2.01533	0	2.08425	2.20051	1.33802	0.907174	0	0	0	0	4.02805	2.51015	5.43636
ENSG00000004846	1.92556	0.0183666	0.0830163	0.303756	0.761313		coding	protein_coding	ENSG00000004846	ABCB5	2.30198	0	0	2.30058	0	2.20051	0	0	3.51197	0	0	0	15.3066	0	3.26182
ENSG00000004848	10.0315	-0.13709	0.219633	-0.68998	0.490207	0.776665	coding	protein_coding	ENSG00000004848	ARX	13.2364	7.52647	7.05366	5.75146	8.33701	7.70177	7.3591	10.8861	15.8039	8.14655	5.77942	17.9811	8.0561	13.8058	13.0473
ENSG00000004864	244.232	-0.0879986	0.189463	-0.464467	0.642313	0.868196	coding	protein_coding	ENSG00000004864	SLC25A13	219.839	247.298	297.261	189.798	261.226	251.958	206.055	346.54	237.058	192.026	219.618	351.916	189.318	204.577	248.985
ENSG00000004866	137.823	0.186007	0.153595	1.21372	0.224855	0.543884	coding	protein_coding	ENSG00000004866	ST7	127.184	146.229	135.027	194.399	149.371	128.73	169.259	127.912	145.747	141.983	124.257	132.718	114.397	102.916	127.211
ENSG00000004897	523.929	-0.243998	0.157759	-1.54426	0.122526	0.390201	coding	protein_coding	ENSG00000004897	CDC27	522.836	646.202	644.906	431.36	534.263	519.319	497.742	475.359	354.709	593.534	693.53	402.434	575.206	470.653	496.884
ENSG00000004939	0						coding	protein_coding	ENSG00000004939	SLC4A1	0	0	0	0	0	0	0	0	0	0	0	0	0	0	0
ENSG00000004948	0						coding	protein_coding	ENSG00000004948	CALCR	0	0	0	0	0	0	0	0	0	0	0	0	0	0	0
ENSG00000004961	184.687	-0.341092	0.13046	-2.61015	0.00905012	0.0704047	coding	protein_coding	ENSG00000004961	HCCS	218.976	198.914	217.656	169.093	179.246	140.832	163.907	156.941	166.819	204.827	141.596	174.673	223.154	223.403	190.273
ENSG00000004975	93.207	0.154102	0.195927	0.78551	0.432154	0.734541	coding	protein_coding	ENSG00000004975	DVL2	96.9708	91.3929	63.4829	92.0234	94.4861	106.725	86.9711	86.1815	121.163	126.853	83.8015	59.0807	95.062	100.406	93.5055
ENSG00000005001	0						coding	protein_coding	ENSG00000005001	PRSS22	0	0	0	0	0	0	0	0	0	0	0	0	0	0	0
ENSG00000005007	236.971	-0.0984592	0.134802	-0.732268	0.464005	0.757078	coding	protein_coding	ENSG00000005007	UPF1	210.055	227.945	285.169	227.758	220.236	216.75	225.456	224.072	256.374	222.284	205.169	258.585	240.072	298.708	235.938
ENSG00000005020	160.191	-0.145314	0.175309	-0.832006	0.405406	0.71405	coding	protein_coding	ENSG00000005020	SKAP2	166.893	175.259	151.15	127.682	160.487	146.334	199.365	183.249	158.039	175.733	104.029	209.779	176.429	112.957	155.48
ENSG00000005022	2065.88	0.102805	0.0813508	1.26369	0.206341	0.520449	coding	protein_coding	ENSG00000005022	SLC25A5	1857.7	1938.6	2125.17	2108.49	2249.6	2002.46	1901.32	2164.52	2309.12	1934.22	2066.14	1948.81	2014.03	2182.58	2185.42
ENSG00000005059	106.881	0.369543	0.223777	1.60196	0.109165	0.365849	coding	protein_coding	ENSG00000005059	CCDC109B	86.3241	168.808	54.4139	159.891	157.014	157.336	129.119	82.5528	70.2395	97.7586	34.6765	96.7554	124.87	111.702	71.76
ENSG00000005073	1.68789	-0.0180819	0.106955	-0.189393	0.849785		coding	protein_coding	ENSG00000005073	HOXA11	2.30198	2.15042	0	0	1.3895	2.20051	0	2.72152	1.75599	0	8.66912	1.71248	2.41683	0	0
ENSG00000005075	106.045	0.0757333	0.168572	0.448336	0.653911	0.874478	coding	protein_coding	ENSG00000005075	POLR2J	100.136	107.521	92.7052	140.336	86.8438	95.722	120.422	113.397	108.871	83.7931	121.368	83.0555	105.535	109.192	121.775
ENSG00000005100	279.982	-0.0629466	0.118207	-0.533389	0.593764	0.842569	coding	protein_coding	ENSG00000005100	DHX33	287.459	295.683	257.962	266.868	275.121	260.76	252.216	319.325	331.881	232.758	288.971	268.86	273.102	304.983	283.778
ENSG00000005102	0						coding	protein_coding	ENSG00000005102	MEOX1	0	0	0	0	0	0	0	0	0	0	0	0	0	0	0
ENSG00000005108	135.894	-0.424391	0.226235	-1.81754	0.0691344	0.277887	coding	protein_coding	ENSG00000005108	THSD7A	150.779	298.909	158.203	79.3702	69.4751	200.246	92.9922	122.468	138.723	231.595	66.4633	102.749	140.982	94.1306	91.3309
ENSG00000005156	128.071	-0.323514	0.216927	-1.46315	0.143427	0.42656	coding	protein_coding	ENSG00000005156	LIG3	173.224	150.529	188.433	63.2661	106.297	194.745	147.851	139.705	84.2873	111.724	66.4633	87.3367	157.094	97.8959	152.218
ENSG00000005175	187.241	-0.262016	0.166264	-1.56201	0.118285	0.382519	coding	protein_coding	ENSG00000005175	RPAP3	232.212	275.254	215.64	217.405	172.298	194.745	222.78	136.076	161.551	135	138.706	191.798	182.873	175.711	156.567
ENSG00000005187	22.2692	0.173256	0.224254	0.759405	0.44761	0.745731	coding	protein_coding	ENSG00000005187	ACSM3	24.7462	10.7521	27.207	39.1099	16.674	28.6066	14.7182	50.8017	21.0718	12.8017	23.1177	15.4124	15.3066	16.316	17.3964
ENSG00000005189	26.8096	-0.0067171	0.226134	-0.0280629	0.977612	0.995653	coding	protein_coding	ENSG00000005189	AC004381.6	16.1138	27.9555	46.3526	23.0058	45.1588	17.604	31.4434	15.422	22.8278	27.931	20.228	33.3934	28.1964	22.5914	23.92
ENSG00000005194	180.237	-0.19475	0.164028	-1.19175	0.233358	0.553156	coding	protein_coding	ENSG00000005194	CIAPIN1	187.611	178.485	179.364	138.035	176.467	148.534	167.921	187.785	275.69	140.819	213.838	176.386	174.817	195.792	162.004
ENSG00000005206	87.4322	-0.0565505	0.167494	-0.350847	0.725703	0.905867	other	processed_transcript	ENSG00000005206	SPPL2B	92.3668	81.716	66.5059	60.9655	87.5386	82.5189	84.2951	95.2533	77.2634	103.578	86.6912	92.4742	95.8676	97.8959	106.553
ENSG00000005238	52.0696	0.289205	0.190178	1.51678	0.129323	0.401928	coding	protein_coding	ENSG00000005238	FAM214B	49.7802	35.482	43.3296	62.1158	54.1906	55.0126	66.9009	64.4094	61.4595	38.4051	49.125	57.3682	43.5029	40.1624	59.8
ENSG00000005243	9.02803	0.244718	0.221034	1.07044	0.284422	0.606071	coding	protein_coding	ENSG00000005243	COPZ2	8.63241	9.6769	8.06132	9.20234	11.8108	18.7043	11.3731	5.44304	8.77993	10.4741	11.5588	5.13745	6.44488	2.51015	7.61091
ENSG00000005249	16.1313	-0.161335	0.226243	-0.676037	0.499017	0.783422	coding	protein_coding	ENSG00000005249	PRKAR2B	21.8688	19.3538	17.1303	20.7053	9.72651	18.7043	14.7182	19.0507	21.0718	22.1121	11.5588	18.8373	14.501	5.0203	7.61091
ENSG00000005302	133.019	0.00552647	0.181949	0.027193	0.978306	0.995653	coding	protein_coding	ENSG00000005302	MSL3	147.327	94.6185	136.035	135.734	118.802	129.83	173.273	135.169	156.283	129.181	89.5809	153.267	135.343	161.905	98.9418
ENSG00000005339	777.515	-0.360714	0.134288	-2.68607	0.00722986	0.059743	coding	protein_coding	ENSG00000005339	CREBBP	913.597	784.904	940.152	687.875	682.94	630.445	812.846	733.904	642.691	645.905	861.133	707.256	966.732	672.72	979.633
ENSG00000005379	0						coding	protein_coding	ENSG00000005379	BZRAP1	0	0	0	0	0	0	0	0	0	0	0	0	0	0	0
ENSG00000005381	0						coding	protein_coding	ENSG00000005381	MPO	0	0	0	0	0	0	0	0	0	0	0	0	0	0	0
ENSG00000005421	10.1104	-0.225554	0.160889	-1.51672	0.129338	0.401928	coding	protein_coding	ENSG00000005421	PON1	8.63241	32.2563	4.03066	5.75146	2.779	5.50126	2.67603	4.53587	43.8997	4.65517	2.88971	4.28121	4.83366	23.8464	1.08727
ENSG00000005436	90.7484	-0.12442	0.197287	-0.626842	0.530763	0.804612	coding	protein_coding	ENSG00000005436	GCFC2	90.3526	115.048	97.7435	66.7169	83.3701	118.827	80.281	114.304	98.3352	110.56	49.125	99.3241	89.4227	72.7944	75.0218
ENSG00000005448	80.3715	0.273222	0.173286	1.57469	0.115328	0.377615	coding	protein_coding	ENSG00000005448	WDR54	68.1961	74.1895	58.4446	70.1678	79.2016	104.524	74.26	74.3883	77.2634	101.25	78.0221	70.2119	85.3947	87.8553	102.204
ENSG00000005469	70.1256	-0.881012	0.209477	-4.2134	2.51551e-05	0.00058135	coding	protein_coding	ENSG00000005469	CROT	98.6972	116.123	79.6055	32.2082	48.6325	37.4086	49.5066	85.2744	84.2873	77.9741	28.8971	60.7932	71.6993	91.6205	89.1564
ENSG00000005471	0.133802	0	0.0420288	0	1		coding	protein_coding	ENSG00000005471	ABCB4	0	0	0	0	0	0	2.00703	0	0	0	0	0	0	0	0
ENSG00000005483	324.937	-0.496203	0.131694	-3.77552	0.000159673	0.00279143	coding	protein_coding	ENSG00000005483	KMT2E	351.051	392.452	330.514	262.267	184.804	292.667	307.075	288.481	307.298	391.034	375.662	357.053	333.523	341.38	358.8
ENSG00000005486	242.384	0.273434	0.11536	2.37196	0.0176938	0.113331	coding	protein_coding	ENSG00000005486	RHBDD2	204.876	247.298	227.732	259.966	268.174	297.068	247.533	289.389	240.57	240.905	225.397	220.054	237.655	217.128	212.018
ENSG00000005513	49.08	1.38219	0.216912	6.63745	3.19163e-11	2.62212e-09	coding	protein_coding	ENSG00000005513	SOX8	8.63241	18.2786	15.115	74.769	65.3066	61.6141	90.3162	70.7596	64.9715	64.0086	49.125	29.1122	46.7254	42.6726	34.7927
ENSG00000005700	419.954	0.352261	0.102573	3.43378	0.000595226	0.00840113	coding	protein_coding	ENSG00000005700	IBTK	348.462	368.797	351.675	401.452	491.189	484.111	450.912	430.001	367.001	471.336	450.794	484.633	428.585	370.247	400.116
ENSG00000005801	153.565	0.25897	0.159272	1.62416	0.104341	0.356491	coding	protein_coding	ENSG00000005801	ZNF195	142.435	108.596	139.058	134.584	168.13	181.542	141.83	180.528	173.843	183.879	170.493	156.692	167.567	112.957	141.345
ENSG00000005810	420.853	-0.122895	0.226307	-0.549321	0.582785	0.836233	coding	protein_coding	ENSG00000005810	MYCBP2	320.838	485.995	503.833	272.619	300.132	531.422	235.491	709.41	396.853	581.896	355.434	547.139	372.997	493.245	205.495
ENSG00000005812	82.6085	0.326083	0.171136	1.90688	0.0565359	0.245582	coding	protein_coding	ENSG00000005812	FBXL3	78.555	75.2647	80.6132	111.578	99.3493	97.9225	88.3091	62.595	66.7275	84.9568	75.1324	107.887	84.5891	61.4987	64.1491
ENSG00000005844	0.268711	-0.0320223	0.0420639	-0.613053	0.539842		coding	protein_coding	ENSG00000005844	ITGAL	0	0	4.03066	0	0	0	0	0	0	0	0	0	0	0	0
ENSG00000005882	49.164	-0.272794	0.226168	-1.20098	0.229759	0.548466	coding	protein_coding	ENSG00000005882	PDK2	51.5067	55.911	67.5136	41.4105	47.243	31.9073	40.8095	41.73	94.8233	47.7155	75.1324	28.256	29.002	62.7538	21.7455
ENSG00000005884	1969.51	0.471527	0.112485	4.19139	2.77251e-05	0.000631502	coding	protein_coding	ENSG00000005884	ITGA3	1788.06	1930	1329.11	2543.3	2337.14	2287.43	2116.07	1984.9	2196.74	1917.93	1985.23	1812.66	1715.95	1979.25	1618.95
ENSG00000005889	361.363	-0.252848	0.226311	-1.14238	0.253295	0.573332	coding	protein_coding	ENSG00000005889	ZFX	435.074	347.293	395.005	394.55	274.427	156.236	519.151	493.503	189.647	252.543	190.721	471.789	355.274	539.682	405.553
ENSG00000005893	471.921	0.0739718	0.0996718	0.742369	0.457864	0.75314	coding	protein_coding	ENSG00000005893	LAMP2	450.036	467.717	474.61	477.371	541.906	441.201	464.961	487.152	424.949	471.336	514.368	517.17	449.53	402.879	493.622
ENSG00000005955	376.536	-0.500682	0.120557	-4.14786	3.35603e-05	0.00074298	coding	protein_coding	ENSG00000005955	GGNBP2	442.843	535.455	442.365	320.931	321.67	330.076	343.201	369.22	298.518	409.655	306.309	450.383	364.941	343.891	368.585
ENSG00000005961	2.87594	0.0600799	0.101148	1.19069	0.233775		coding	protein_coding	ENSG00000005961	ITGA2B	0.287747	1.07521	0	0	0.694751	6.60152	0.669009	0	1.75599	0	0	0	1.61122	0	30.4436
ENSG00000005981	14.1756	-0.335365	0.196004	-2.23959	0.0251174	0.144772	coding	protein_coding	ENSG00000005981	ASB4	17.8403	9.6769	18.138	6.90175	3.47375	2.20051	6.69009	43.5444	8.77993	16.2931	14.4485	6.84994	11.2785	38.9073	7.61091
ENSG00000006007	389.514	0.225463	0.110075	2.04922	0.0404402	0.19861	coding	protein_coding	ENSG00000006007	GDE1	378.963	359.12	373.844	476.221	437.693	402.692	377.99	350.169	467.092	379.396	416.118	356.197	353.663	327.575	385.982
ENSG00000006015	75.1244	0.192008	0.173796	1.09644	0.272885	0.593082	coding	protein_coding	ENSG00000006015	C19orf60	67.9083	58.0614	59.4522	59.8152	70.1698	91.321	72.2529	92.5318	79.0194	72.1551	89.5809	69.3556	74.9217	86.6002	83.72
ENSG00000006016	4.96653	0.172916	0.168684	1.08567	0.277625	0.598129	coding	protein_coding	ENSG00000006016	CRLF1	2.87747	5.37605	1.00767	1.15029	3.47375	15.4035	3.34504	7.25739	1.75599	11.6379	0	5.13745	4.02805	8.78553	3.26182
ENSG00000006025	43.9915	-0.00458042	0.209486	-0.00343529	0.997259	0.999261	coding	protein_coding	ENSG00000006025	OSBPL7	48.917	51.6101	55.4216	48.3123	40.9903	67.1154	28.7674	31.7511	31.6078	31.4224	52.0147	62.5057	38.6693	25.1015	45.6655
ENSG00000006042	76.368	0.2408	0.21106	1.13884	0.25477	0.575044	coding	protein_coding	ENSG00000006042	TMEM98	66.7573	86.0169	60.4599	129.983	80.5911	61.6141	84.2951	48.9874	52.6796	74.4827	72.2427	101.037	93.4508	58.9885	73.9345
ENSG00000006047	2.58547	0.0544623	0.157973	0.332348	0.739626		coding	protein_coding	ENSG00000006047	YBX2	2.58972	0	5.03833	2.30058	4.1685	3.30076	3.34504	1.81435	1.75599	0	0	2.56873	1.61122	3.76523	6.52364
ENSG00000006059	0						coding	protein_coding	ENSG00000006059	KRT33A	0	0	0	0	0	0	0	0	0	0	0	0	0	0	0
ENSG00000006062	153.145	0.837262	0.171816	4.87669	1.07881e-06	3.64207e-05	other	processed_transcript	ENSG00000006062	MAP3K14	92.3668	107.521	102.782	188.648	224.404	193.644	125.105	217.722	163.307	187.371	158.934	139.567	153.872	117.977	123.949
ENSG00000006071	5.24025	0.264837	0.160201	2.32647	0.0199934	0.123282	coding	protein_coding	ENSG00000006071	ABCC8	0.575494	1.07521	1.00767	14.9538	4.1685	0	4.68306	0.907174	1.75599	27.931	8.66912	5.13745	3.22244	1.25508	3.26182
ENSG00000006074	0						coding	protein_coding	ENSG00000006074	CCL18	0	0	0	0	0	0	0	0	0	0	0	0	0	0	0
ENSG00000006075	0						coding	protein_coding	ENSG00000006075	CCL3	0	0	0	0	0	0	0	0	0	0	0	0	0	0	0
ENSG00000006114	196.304	-0.466696	0.187842	-2.47671	0.0132599	0.091927	coding	protein_coding	ENSG00000006114	SYNRG	221.853	226.869	299.277	162.191	183.414	146.334	188.66	196.857	156.283	210.646	173.382	130.149	305.326	176.966	166.353
ENSG00000006116	0						coding	protein_coding	ENSG00000006116	CACNG3	0	0	0	0	0	0	0	0	0	0	0	0	0	0	0
ENSG00000006118	419.43	0.585029	0.178004	3.28494	0.00102003	0.0131083	coding	protein_coding	ENSG00000006118	TMEM132A	320.838	364.496	290.208	371.544	690.582	543.525	454.257	378.292	500.456	455.043	317.868	362.19	350.44	529.642	362.062
ENSG00000006125	1514.67	-0.000914878	0.121018	-0.00766747	0.993882	0.998166	coding	protein_coding	ENSG00000006125	AP2B1	1674.11	1491.32	1331.13	1511.48	1556.24	1431.43	1746.11	1321.75	1320.5	1528.06	1283.03	1726.18	1662.78	1473.46	1662.44
ENSG00000006128	0						coding	protein_coding	ENSG00000006128	TAC1	0	0	0	0	0	0	0	0	0	0	0	0	0	0	0
ENSG00000006194	119.66	-0.179454	0.177726	-1.00501	0.314894	0.63655	coding	protein_coding	ENSG00000006194	ZNF263	135.241	134.401	130.996	103.526	136.866	101.223	108.379	123.376	145.747	73.3189	106.919	136.999	114.397	105.426	138.084
ENSG00000006210	0.945433	0.00564967	0.0956279	0.0420079	0.966492		coding	protein_coding	ENSG00000006210	CX3CL1	0.863241	1.07521	0	2.30058	0	0	0.669009	0	0	1.16379	0	3.42497	0	2.51015	2.17455
ENSG00000006282	236.445	-0.0974551	0.153354	-0.635957	0.524805	0.801455	coding	protein_coding	ENSG00000006282	SPATA20	226.457	252.675	256.955	195.55	227.183	255.259	291.019	221.35	201.938	209.483	210.949	263.723	203.014	288.667	242.462
ENSG00000006283	66.1921	0.163313	0.226276	0.721631	0.470522	0.761504	coding	protein_coding	ENSG00000006283	CACNA1G	67.3328	44.0836	63.4829	34.5088	91.7071	92.4212	90.3162	109.768	31.6078	67.5	60.6839	41.9559	41.0861	64.0088	92.4182
ENSG00000006327	553.923	0.815936	0.0952694	8.56511	1.07971e-17	1.99297e-15	coding	protein_coding	ENSG00000006327	TNFRSF12A	350.476	412.881	366.79	706.279	637.086	692.059	643.586	674.938	765.61	524.87	473.912	530.014	542.981	480.694	506.669
ENSG00000006377	0.0463167	0.0111095	0.0419558	0.30069	0.763651		coding	protein_coding	ENSG00000006377	DLX6	0	0	0	0	0.694751	0	0	0	0	0	0	0	0	0	0
ENSG00000006432	165.249	-0.906901	0.169197	-5.34144	9.22109e-08	3.94757e-06	coding	protein_coding	ENSG00000006432	MAP3K9	255.807	194.613	244.863	86.2719	129.918	108.925	223.449	175.992	142.235	172.241	147.375	124.155	163.539	150.609	158.742
ENSG00000006451	285.863	0.268647	0.129667	2.07145	0.0383165	0.191758	coding	protein_coding	ENSG00000006451	RALA	290.337	222.569	264.008	354.29	321.67	286.066	304.399	283.038	291.494	313.06	216.728	267.148	271.491	320.044	281.604
ENSG00000006453	416.674	-0.00733983	0.112575	-0.0653858	0.947867	0.988322	coding	protein_coding	ENSG00000006453	BAIAP2L1	426.153	377.399	444.38	381.897	408.513	453.304	383.342	449.051	338.905	414.31	433.456	490.627	440.669	400.369	407.727
ENSG00000006459	85.8597	0.70221	0.216218	3.16237	0.00156489	0.0183513	coding	protein_coding	ENSG00000006459	KDM7A	56.6862	81.716	71.5442	126.532	157.014	147.434	85.6331	67.1309	194.914	75.6465	46.2353	59.0807	33.8356	46.4378	38.0545
ENSG00000006468	18.8723	0.0427132	0.224636	0.189195	0.84994	0.955753	coding	protein_coding	ENSG00000006468	ETV1	14.9628	22.5794	14.1073	25.3064	22.232	6.60152	22.0773	27.2152	12.2919	24.4396	26.0074	11.1311	12.8898	23.8464	17.3964
ENSG00000006530	191.254	-0.11357	0.139934	-0.813203	0.416102	0.724217	coding	protein_coding	ENSG00000006530	AGK	186.748	238.697	162.234	175.995	168.13	192.544	216.09	193.228	180.867	201.336	236.956	185.805	165.956	187.006	177.225
ENSG00000006534	699.142	-0.0196657	0.0677273	-0.289641	0.772091	0.926289	coding	protein_coding	ENSG00000006534	ALDH3B1	707.858	704.263	732.573	689.025	719.067	701.961	707.142	709.41	695.371	643.577	655.964	643.894	708.131	780.657	688.244
ENSG00000006555	0.0191831	-0.00303674	0.0419456	-0.0700174	0.94418		coding	protein_coding	ENSG00000006555	TTC22	0.287747	0	0	0	0	0	0	0	0	0	0	0	0	0	0
ENSG00000006576	83.6989	-0.761208	0.203155	-3.79654	0.00014673	0.00259812	coding	protein_coding	ENSG00000006576	PHTF2	79.4182	141.928	82.6285	35.6591	49.3273	56.1129	83.6261	95.2533	84.2873	69.8275	118.478	100.18	93.4508	97.8959	67.4109
ENSG00000006606	10.392	0.452506	0.217365	1.99841	0.0456717	0.215429	coding	protein_coding	ENSG00000006606	CCL26	9.7834	2.15042	9.06899	13.8035	17.3688	19.8045	8.0281	9.97891	14.0479	16.2931	2.88971	7.70618	8.0561	12.5508	4.34909
ENSG00000006607	163.249	0.0509177	0.168024	0.303256	0.761695	0.922776	coding	protein_coding	ENSG00000006607	FARP2	158.261	135.477	185.41	174.844	177.856	146.334	192.005	113.397	210.718	132.672	124.257	129.293	190.93	187.006	190.273
ENSG00000006611	5.89027	-0.0523289	0.132291	-0.991181	0.321597	0.643176	coding	protein_coding	ENSG00000006611	USH1C	6.33044	0	1.00767	1.15029	1.3895	0	1.33802	3.6287	63.2155	4.65517	2.88971	0.856242	0.80561	0	1.08727
ENSG00000006625	156.861	-0.00854584	0.141622	-0.0560422	0.955308	0.990574	coding	protein_coding	ENSG00000006625	GGCT	153.081	182.786	172.311	180.596	163.266	157.336	153.872	146.962	119.407	158.276	147.375	200.361	140.982	122.997	153.305
ENSG00000006634	194.908	-0.116153	0.158334	-0.732493	0.463868	0.757078	coding	protein_coding	ENSG00000006634	DBF4	199.696	226.869	201.533	190.948	161.877	220.051	205.386	181.435	187.891	182.715	156.044	224.335	248.128	168.18	168.527
ENSG00000006638	22.0035	-0.0161939	0.226239	-0.0790783	0.93697	0.985188	coding	protein_coding	ENSG00000006638	TBXA2R	25.6095	21.5042	15.115	13.8035	24.3163	23.1053	24.7533	30.8439	8.77993	10.4741	31.7868	26.5435	22.5571	22.5914	28.2691
ENSG00000006652	177.797	-0.284346	0.152209	-1.87092	0.0613564	0.25931	coding	protein_coding	ENSG00000006652	IFRD1	196.531	170.959	201.533	138.035	156.319	159.537	121.76	178.713	198.426	174.569	196.5	201.217	169.984	199.557	203.32
ENSG00000006659	0						coding	protein_coding	ENSG00000006659	LGALS14	0	0	0	0	0	0	0	0	0	0	0	0	0	0	0
ENSG00000006695	93.8854	-0.354039	0.187555	-1.87467	0.0608382	0.257883	coding	protein_coding	ENSG00000006695	COX10	117.401	94.6185	137.042	101.226	83.3701	71.5164	99.6823	89.8102	50.9236	89.612	72.2427	95.0429	95.062	120.487	90.2436
ENSG00000006704	137.413	0.11261	0.225805	0.496705	0.619397	0.858375	coding	protein_coding	ENSG00000006704	GTF2IRD1	109.919	161.282	115.881	195.55	120.887	130.93	68.9079	85.2744	221.254	67.5	115.588	115.593	89.4227	268.586	194.622
ENSG00000006712	353.113	-0.161185	0.131215	-1.22624	0.220109	0.537712	coding	protein_coding	ENSG00000006712	PAF1	364.576	386.001	424.227	346.238	343.207	346.58	343.201	404.6	338.905	316.552	288.971	285.985	343.19	464.378	300.087
ENSG00000006715	296.029	0.190514	0.192288	0.991793	0.321298	0.642776	coding	protein_coding	ENSG00000006715	VPS41	289.186	240.847	245.87	285.272	282.764	357.582	250.878	191.414	295.006	208.319	502.809	375.89	365.747	258.545	290.302
ENSG00000006740	23.8898	-0.138125	0.226293	-0.559274	0.575974	0.832197	coding	protein_coding	ENSG00000006740	ARHGAP44	30.2134	23.6546	41.3143	47.162	12.5055	22.0051	20.0703	21.7722	21.0718	10.4741	20.228	17.9811	24.9739	18.8261	26.0945
ENSG00000006744	349.827	-0.615162	0.163243	-3.76689	0.000165292	0.00287551	coding	protein_coding	ENSG00000006744	ELAC2	367.453	398.903	562.277	323.232	275.121	201.346	388.025	449.051	405.633	303.75	375.662	272.285	303.715	277.372	343.578
ENSG00000006747	2.26902	0.291861	0.116655	1.90714	0.0565029		coding	protein_coding	ENSG00000006747	SCIN	1.15099	0	1.00767	0	19.453	2.20051	0.669009	0.907174	0	2.32758	2.88971	0	0	1.25508	2.17455
ENSG00000006756	122.352	-0.265147	0.208949	-1.27269	0.203128	0.516073	coding	protein_coding	ENSG00000006756	ARSD	131.5	166.658	111.851	97.7748	111.855	103.424	149.858	75.2954	129.943	152.457	78.0221	155.836	160.316	126.763	83.72
ENSG00000006757	38.5755	0.413975	0.225549	1.84051	0.0656933	0.269855	coding	protein_coding	ENSG00000006757	PNPLA4	44.8885	7.52647	25.1916	67.8672	38.2113	46.2106	38.1335	43.5444	28.0958	53.5345	14.4485	39.3871	43.5029	48.9479	39.1418
ENSG00000006788	0						coding	protein_coding	ENSG00000006788	MYH13	0	0	0	0	0	0	0	0	0	0	0	0	0	0	0
ENSG00000006831	336.516	-0.0161145	0.119623	-0.135018	0.892598	0.968314	coding	protein_coding	ENSG00000006831	ADIPOR2	323.715	348.368	338.575	285.272	319.585	391.69	330.49	263.08	314.322	387.543	323.647	345.066	359.302	370.247	346.84
ENSG00000006837	12.3595	0.0596515	0.207117	0.294789	0.768155	0.924547	coding	protein_coding	ENSG00000006837	CDKL3	11.2221	8.60169	8.06132	3.45088	12.5055	16.5038	14.7182	5.44304	10.5359	12.8017	5.77942	7.70618	24.9739	37.6523	5.43636
ENSG00000007001	0						coding	protein_coding	ENSG00000007001	UPP2	0	0	0	0	0	0	0	0	0	0	0	0	0	0	0
ENSG00000007038	0						coding	protein_coding	ENSG00000007038	PRSS21	0	0	0	0	0	0	0	0	0	0	0	0	0	0	0
ENSG00000007047	70.4954	-0.260945	0.224759	-1.18044	0.237824	0.557973	coding	protein_coding	ENSG00000007047	MARK4	61.8656	53.7605	113.866	47.162	60.4433	56.1129	46.1616	78.017	59.7035	153.621	78.0221	47.9496	81.3666	71.5393	47.84
ENSG00000007062	0.28056	-0.00710566	0.0420602	-0.164214	0.869563		coding	protein_coding	ENSG00000007062	PROM1	0	1.07521	0	0	0	0	0	0	0	2.32758	0	0	0.80561	0	0
ENSG00000007080	217.946	0.369182	0.125122	2.95122	0.00316521	0.0321796	coding	protein_coding	ENSG00000007080	CCDC124	165.742	215.042	165.257	220.856	229.962	264.061	224.118	252.194	252.862	202.5	219.618	222.623	198.18	220.893	215.28
ENSG00000007129	0						coding	protein_coding	ENSG00000007129	CEACAM21	0	0	0	0	0	0	0	0	0	0	0	0	0	0	0
ENSG00000007168	730.932	-0.0828821	0.112534	-0.734429	0.462687	0.756491	coding	protein_coding	ENSG00000007168	PAFAH1B1	868.996	769.851	772.879	786.8	679.466	811.986	800.134	717.575	751.562	643.577	823.567	592.52	696.047	583.61	665.411
ENSG00000007171	0.234013	-0.00272793	0.0420731	-0.0700228	0.944175		coding	protein_coding	ENSG00000007171	NOS2	0.287747	0	0	0	0	0	0	0	0	0	0	0	3.22244	0	0
ENSG00000007174	0.261137	0.0243885	0.0421078	0.522296	0.601464		coding	protein_coding	ENSG00000007174	DNAH9	0	0	0	0	2.08425	0	0.669009	0	0	1.16379	0	0	0	0	0
ENSG00000007202	867.624	-0.0824843	0.167911	-0.491576	0.623019	0.859468	coding	protein_coding	ENSG00000007202	KIAA0100	1029.27	866.62	734.588	802.904	753.11	905.508	791.437	1051.41	1253.77	804.181	491.25	774.043	955.454	1059.28	741.52
ENSG00000007216	0						coding	protein_coding	ENSG00000007216	SLC13A2	0	0	0	0	0	0	0	0	0	0	0	0	0	0	0
ENSG00000007237	6.38444	-0.0376098	0.153255	-0.502369	0.615408	0.856176	coding	protein_coding	ENSG00000007237	GAS7	2.58972	2.15042	3.023	1.15029	0.694751	3.30076	0	0.907174	0	4.65517	63.5736	5.13745	0.80561	1.25508	6.52364
ENSG00000007255	20.0479	0.430129	0.225375	1.91385	0.0556389	0.243546	coding	protein_coding	ENSG00000007255	TRAPPC6A	13.8119	16.1282	17.1303	37.9596	15.2845	28.6066	20.0703	15.422	14.0479	30.2586	14.4485	20.5498	20.9459	17.5711	18.4836
ENSG00000007264	0.177968	-0.00655739	0.0420302	-0.164211	0.869565		coding	protein_coding	ENSG00000007264	MATK	0	0	1.00767	0	0	0	0	0	0	0	0	0.856242	0.80561	0	0
ENSG00000007306	0.27906	0.00164742	0.0420587	0.034177	0.972736		coding	protein_coding	ENSG00000007306	CEACAM7	0.575494	0	0	0	0	1.10025	0	0	0	0	0	0	0	2.51015	0
ENSG00000007312	0						coding	protein_coding	ENSG00000007312	CD79B	0	0	0	0	0	0	0	0	0	0	0	0	0	0	0
ENSG00000007314	0.210539	-0.023168	0.0420329	-0.535928	0.592008		coding	protein_coding	ENSG00000007314	SCN4A	0	2.15042	1.00767	0	0	0	0	0	0	0	0	0	0	0	0
ENSG00000007341	31.3037	0.0421648	0.212799	0.187761	0.851064	0.955871	coding	protein_coding	ENSG00000007341	ST7L	27.336	27.9555	29.2223	27.607	37.5165	20.9048	40.8095	41.73	26.3398	36.0776	43.3456	33.3934	23.3627	21.3363	32.6182
ENSG00000007350	0						coding	protein_coding	ENSG00000007350	TKTL1	0	0	0	0	0	0	0	0	0	0	0	0	0	0	0
ENSG00000007372	42.991	-0.253801	0.225291	-1.16478	0.244109	0.563874	coding	protein_coding	ENSG00000007372	PAX6	33.9542	58.0614	48.3679	12.6532	30.569	49.5114	36.1265	38.1013	47.4116	17.4569	80.9118	30.8247	40.2805	72.7944	47.84
ENSG00000007376	75.8254	0.358218	0.183668	1.95221	0.0509131	0.231243	coding	protein_coding	ENSG00000007376	RPUSD1	62.4411	72.0391	64.4906	103.526	76.4226	92.4212	63.5558	91.6246	71.9954	64.0086	63.5736	69.3556	102.312	60.2436	79.3709
ENSG00000007384	86.8679	0.177165	0.214259	0.823678	0.410122	0.718308	coding	protein_coding	ENSG00000007384	RHBDF1	71.649	79.5656	103.79	109.278	89.6228	106.725	87.6401	44.4515	84.2873	54.6982	52.0147	106.174	74.1161	136.803	102.204
ENSG00000007392	173.335	0.0278364	0.153309	0.181625	0.855877	0.956937	coding	protein_coding	ENSG00000007392	LUC7L	175.526	206.44	127.973	181.746	149.371	193.644	172.604	191.414	212.474	172.241	196.5	165.255	152.26	140.568	162.004
ENSG00000007402	4.32713	0.168771	0.157581	1.13281	0.257293		coding	protein_coding	ENSG00000007402	CACNA2D2	2.87747	1.07521	3.023	4.60117	8.33701	4.40101	4.01405	8.16457	0	0	8.66912	3.42497	12.8898	1.25508	2.17455
ENSG00000007516	3.51677	-0.0206558	0.107874	-0.683369	0.494374		coding	protein_coding	ENSG00000007516	BAIAP3	0.863241	0	2.01533	0	0.694751	0	12.7112	0.907174	0	0	31.7868	1.71248	0.80561	1.25508	0
ENSG00000007520	52.5023	0.163232	0.203324	0.801768	0.422687	0.72781	coding	protein_coding	ENSG00000007520	TSR3	42.5866	44.0836	49.3756	41.4105	45.1588	72.6167	42.8166	44.4515	70.2395	57.0258	37.5662	42.8121	59.6151	62.7538	75.0218
ENSG00000007541	131.07	0.395	0.196035	2.01742	0.0436521	0.209604	coding	protein_coding	ENSG00000007541	PIGQ	113.948	80.6408	114.874	127.682	168.13	151.835	109.048	131.54	89.5553	217.629	104.029	122.443	175.623	124.252	134.822
ENSG00000007545	125.691	0.420318	0.209335	2.01222	0.0441966	0.210865	coding	protein_coding	ENSG00000007545	CRAMP1L	98.985	111.822	80.6132	135.734	172.993	135.331	197.358	216.815	110.627	144.31	69.353	107.03	120.036	61.4987	122.862
ENSG00000007866	25.392	0.0327467	0.22578	0.135591	0.892144	0.96829	coding	protein_coding	ENSG00000007866	TEAD3	16.4016	11.8273	27.207	17.2544	24.3163	15.4035	22.7463	32.6583	29.8518	27.931	28.8971	13.6999	19.3346	31.3769	61.9745
ENSG00000007908	0.0383663	-0.00842356	0.0419715	-0.164936	0.868994		coding	protein_coding	ENSG00000007908	SELE	0.575494	0	0	0	0	0	0	0	0	0	0	0	0	0	0
ENSG00000007923	302.911	-0.229027	0.150502	-1.51942	0.128656	0.400769	coding	protein_coding	ENSG00000007923	DNAJC11	340.117	341.917	339.583	333.585	309.164	207.948	349.892	330.211	349.441	217.629	234.066	324.516	267.463	310.004	288.127
ENSG00000007933	0.572579	-0.0491703	0.0714806	-0.65483	0.512577		coding	protein_coding	ENSG00000007933	FMO3	0.575494	2.15042	1.00767	0	0	1.10025	1.33802	0	0	0	0	0	2.41683	0	0
ENSG00000007944	22.3535	-0.0288119	0.22436	-0.138101	0.89016	0.967672	coding	protein_coding	ENSG00000007944	MYLIP	25.034	16.1282	22.1686	26.4567	18.7583	17.604	15.3872	30.8439	24.5838	22.1121	28.8971	21.4061	28.1964	13.8058	23.92
ENSG00000007952	1.01145	0.119961	0.0940802	1.28835	0.197625		coding	protein_coding	ENSG00000007952	NOX1	0.575494	0	0	2.30058	0	4.40101	2.67603	0	0	1.16379	0	1.71248	0	1.25508	1.08727
ENSG00000007968	65.5633	0.0199266	0.199369	0.0938113	0.925259	0.980766	coding	protein_coding	ENSG00000007968	E2F2	65.6063	52.6853	58.4446	33.3585	68.7803	78.1179	78.274	87.0887	80.7754	37.2414	37.5662	42.8121	75.7274	105.426	81.5455
ENSG00000008018	433.5	0.20832	0.0783938	2.65868	0.00784472	0.0633146	coding	protein_coding	ENSG00000008018	PSMB1	422.7	411.806	400.043	458.967	478.683	500.615	423.482	437.258	453.044	410.819	421.897	432.402	416.5	425.47	408.815
ENSG00000008056	0.70217	0.0364893	0.0987724	0.565925	0.571445		coding	protein_coding	ENSG00000008056	SYN1	0	0	1.00767	0	0.694751	1.10025	0.669009	0	0	1.16379	0	0.856242	1.61122	1.25508	2.17455
ENSG00000008083	384.531	0.393126	0.0963699	4.08075	4.489e-05	0.000948026	coding	protein_coding	ENSG00000008083	JARID2	360.259	363.421	357.721	493.475	493.273	451.104	386.687	346.54	368.757	403.836	427.677	341.641	343.996	301.218	328.356
ENSG00000008086	122.969	0.227043	0.187268	1.21281	0.225202	0.544076	coding	protein_coding	ENSG00000008086	CDKL5	112.221	116.123	82.6285	159.891	101.434	123.228	127.781	137.89	196.67	112.888	115.588	103.605	150.649	94.1306	109.815
ENSG00000008118	0.306152	0.0209303	0.0421678	0.34203	0.732328		coding	protein_coding	ENSG00000008118	CAMK1G	0	0	1.00767	0	2.779	0	0	0	0	0	0	0	0.80561	0	0
ENSG00000008128	97.7778	0.0257854	0.186453	0.137801	0.890398	0.967672	coding	protein_coding	ENSG00000008128	CDK11A	119.991	82.7912	81.6209	106.977	102.128	86.92	93.6612	85.2744	136.967	104.741	66.4633	78.7743	120.842	101.661	97.8545
ENSG00000008130	148.915	0.10587	0.187097	0.566362	0.571148	0.829439	coding	protein_coding	ENSG00000008130	NADK	124.307	144.078	157.196	150.688	134.087	181.542	138.485	160.57	237.058	101.25	98.2501	139.567	199.791	141.823	125.036
ENSG00000008196	0.117066	0	0.0419558	0	1		coding	protein_coding	ENSG00000008196	TFAP2B	0	0	0	0	0	0	0	0	1.75599	0	0	0	0	0	0
ENSG00000008197	0						coding	protein_coding	ENSG00000008197	TFAP2D	0	0	0	0	0	0	0	0	0	0	0	0	0	0	0
ENSG00000008226	0.305435	-0.0151267	0.0451944	-0.253962	0.799525		coding	protein_coding	ENSG00000008226	DLEC1	1.15099	1.07521	0	0	0	1.10025	0	0	0	0	0	0	0	1.25508	0
ENSG00000008256	180.009	-0.477453	0.158205	-3.01601	0.00256123	0.0271866	coding	protein_coding	ENSG00000008256	CYTH3	197.97	225.794	223.702	128.833	145.203	163.938	175.28	156.034	166.819	210.646	199.39	197.792	116.813	207.087	184.836
ENSG00000008277	5.76579	-0.0357566	0.145799	-0.301622	0.76294	0.922902	coding	protein_coding	ENSG00000008277	ADAM22	4.8917	6.45126	3.023	2.30058	6.25276	2.20051	4.68306	2.72152	3.51197	3.49138	8.66912	0	0.80561	36.3972	1.08727
ENSG00000008282	299.408	-0.107902	0.121669	-0.883673	0.376873	0.69259	coding	protein_coding	ENSG00000008282	SYPL1	342.131	297.833	341.598	318.631	293.88	297.068	270.949	290.296	217.742	301.422	245.625	320.235	279.547	333.85	340.316
ENSG00000008283	58.8067	-0.246985	0.202384	-1.21712	0.223557	0.542314	coding	protein_coding	ENSG00000008283	CYB561	69.0593	63.4374	61.4676	41.4105	60.4433	50.6116	48.1686	61.6878	89.5553	39.5689	69.353	49.6621	45.9198	66.519	65.2364
ENSG00000008294	704.427	-0.0315358	0.106687	-0.294559	0.768331	0.924586	coding	protein_coding	ENSG00000008294	SPAG9	707.858	782.753	748.695	714.331	762.836	704.162	682.389	717.575	637.423	836.767	725.317	606.22	639.654	707.862	592.564
ENSG00000008300	110.718	0.303257	0.218619	1.37403	0.169433	0.466335	coding	protein_coding	ENSG00000008300	CELSR3	118.552	97.8442	88.6745	251.914	77.1173	100.123	83.6261	129.726	91.3113	105.905	106.919	83.0555	111.174	110.447	104.378
ENSG00000008311	37.091	0.21915	0.209112	1.04465	0.296185	0.618656	coding	protein_coding	ENSG00000008311	AASS	33.9542	33.3315	24.184	49.4626	31.2638	36.3083	39.4715	37.1941	26.3398	53.5345	49.125	34.2497	36.2525	40.1624	31.5309
ENSG00000008323	0.159711	-0.00274449	0.0420168	-0.0699146	0.944262		coding	protein_coding	ENSG00000008323	PLEKHG6	0.287747	0	1.00767	0	0	1.10025	0	0	0	0	0	0	0	0	0
ENSG00000008324	18.5993	-0.0216023	0.224113	-0.0740317	0.940985	0.986955	coding	protein_coding	ENSG00000008324	SS18L2	21.581	19.3538	24.184	24.1561	22.9268	16.5038	19.4013	14.5148	17.5599	12.8017	8.66912	23.9748	17.7234	22.5914	13.0473
ENSG00000008382	23.5212	0.0535646	0.185506	0.331304	0.740415	0.912075	coding	protein_coding	ENSG00000008382	MPND	9.20791	25.8051	12.092	28.7573	7.64226	20.9048	15.3872	16.3291	10.5359	12.8017	132.927	7.70618	32.2244	15.0609	5.43636
ENSG00000008394	2156.51	-0.0133537	0.111828	-0.119045	0.90524	0.973683	coding	protein_coding	ENSG00000008394	MGST1	2461.68	1986.99	2342.82	2314.39	2223.9	2193.9	2318.78	2035.7	1566.34	2133.23	2138.38	2306.72	2007.58	2193.87	2123.44
ENSG00000008405	156.055	0.898998	0.172959	5.19243	2.07565e-07	8.12707e-06	coding	protein_coding	ENSG00000008405	CRY1	117.113	90.3177	87.6669	200.151	197.309	243.156	126.443	163.291	170.331	179.224	147.375	123.299	130.509	165.67	198.971
ENSG00000008438	0.0836717	0	0.0419558	0	1		coding	protein_coding	ENSG00000008438	PGLYRP1	0	0	0	0	0	0	0	0	0	0	0	0	0	1.25508	0
ENSG00000008441	61.7993	0.0549538	0.201748	0.267985	0.788711	0.933376	coding	protein_coding	ENSG00000008441	NFIX	53.521	61.287	52.3986	65.5666	51.4115	59.4136	52.1827	57.152	73.7514	54.6982	98.2501	70.2119	44.3086	50.203	82.6327
ENSG00000008513	434.839	0.890623	0.169845	5.23011	1.69409e-07	6.821e-06	coding	protein_coding	ENSG00000008513	ST3GAL1	346.16	337.616	256.955	875.372	610.686	495.114	555.277	409.136	379.293	415.474	410.338	423.84	389.11	330.085	288.127
ENSG00000008516	0.320875	-0.00649734	0.0544785	-0.112444	0.910471		coding	protein_coding	ENSG00000008516	MMP25	1.15099	0	0	0	0	1.10025	0.669009	0	0	0	0	0	0.80561	0	1.08727
ENSG00000008517	55.9216	0.231741	0.193466	1.20043	0.229971	0.548841	coding	protein_coding	ENSG00000008517	IL32	55.2474	51.6101	62.4752	71.3181	67.3908	70.4162	72.9219	41.73	42.1437	50.0431	54.9044	38.5309	50.7534	61.4987	47.84
ENSG00000008710	225.243	0.0102065	0.191122	0.0511506	0.959206	0.991195	coding	protein_coding	ENSG00000008710	PKD1	215.235	236.546	174.326	230.058	141.034	264.061	252.885	277.595	203.694	338.664	184.941	217.486	181.262	234.699	226.153
ENSG00000008735	7.37443	0.5225	0.201928	2.79294	0.00522309	0.0471039	coding	protein_coding	ENSG00000008735	MAPK8IP2	4.02846	0	1.00767	12.6532	6.94751	12.1028	8.0281	5.44304	10.5359	11.6379	11.5588	10.2749	6.44488	1.25508	8.69818
ENSG00000008838	160.986	-0.22287	0.175679	-1.27012	0.204042	0.5169	coding	protein_coding	ENSG00000008838	MED24	208.041	108.596	192.464	132.284	141.729	151.835	173.273	176.899	180.867	153.621	187.831	148.986	158.705	175.711	123.949
ENSG00000008853	220.684	-0.543843	0.183783	-2.97795	0.00290185	0.0299956	coding	protein_coding	ENSG00000008853	RHOBTB2	237.679	265.577	239.824	172.544	121.581	167.238	210.738	216.815	237.058	165.259	361.213	191.798	213.487	232.189	277.255
ENSG00000008869	118.792	0.109174	0.225678	0.484495	0.628035	0.862073	coding	protein_coding	ENSG00000008869	HEATR5B	129.198	75.2647	113.866	133.434	125.75	108.925	114.4	167.827	52.6796	150.129	271.633	89.0492	119.23	48.9479	81.5455
ENSG00000008952	534.529	-0.0964721	0.134015	-0.721128	0.470831	0.761507	coding	protein_coding	ENSG00000008952	SEC62	447.159	562.335	600.568	539.487	436.303	514.918	583.376	412.764	505.724	566.767	612.618	636.188	588.095	499.52	512.105
ENSG00000008988	2313.55	0.00349082	0.100695	0.0350813	0.972015	0.994385	coding	protein_coding	ENSG00000008988	RPS20	2704.53	2232.14	2361.97	2561.7	2504.58	2261.02	2401.07	2115.53	1940.36	2200.73	2193.29	2695.45	2120.37	2200.15	2210.43
ENSG00000009307	1269.22	-0.0822953	0.0958606	-0.857449	0.391197	0.702745	coding	protein_coding	ENSG00000009307	CSDE1	1406.8	1309.61	1439.95	1343.54	1413.82	1155.27	1140.66	1138.5	1218.65	1339.53	1086.53	1238.98	1131.08	1355.48	1319.95
ENSG00000009335	788.241	-0.155731	0.128079	-1.21679	0.223684	0.542443	coding	protein_coding	ENSG00000009335	UBE3C	869.859	778.453	776.91	815.557	692.666	651.35	915.873	810.106	574.208	716.896	757.103	799.73	905.506	847.176	912.222
ENSG00000009413	164.851	-0.236323	0.19493	-1.23307	0.21755	0.534492	coding	protein_coding	ENSG00000009413	REV3L	126.609	224.719	112.858	138.035	96.5703	136.431	181.97	120.654	193.158	236.25	210.949	262.866	142.593	129.273	159.829
ENSG00000009694	0.159938	-0.00274757	0.0420154	-0.0700215	0.944177		coding	protein_coding	ENSG00000009694	TENM1	0.287747	0	0	0	0	0	0	0	0	0	0	0.856242	0	1.25508	0
ENSG00000009709	61.5278	-0.4713	0.177641	-2.63789	0.0083424	0.0660928	coding	protein_coding	ENSG00000009709	PAX7	81.1447	75.2647	69.5289	64.4164	47.243	41.8096	67.5699	67.1309	54.4356	54.6982	40.4559	50.5183	63.6432	76.5596	68.4982
ENSG00000009724	1.27734	0.0583638	0.102291	0.44341	0.65747		coding	protein_coding	ENSG00000009724	MASP2	2.01423	0	2.01533	4.60117	0.694751	2.20051	0	0	0	2.32758	2.88971	0	2.41683	0	0
ENSG00000009765	4.42345	0.315554	0.184111	1.63825	0.10137		coding	protein_coding	ENSG00000009765	IYD	3.16522	4.30084	1.00767	11.5029	5.55801	6.60152	8.0281	3.6287	0	9.31034	2.88971	3.42497	2.41683	1.25508	3.26182
ENSG00000009780	28.6922	-0.0173218	0.211006	-0.0828675	0.933957	0.984377	coding	protein_coding	ENSG00000009780	FAM76A	27.6237	29.0307	29.2223	29.9076	25.011	29.7068	22.0773	34.4726	24.5838	22.1121	37.5662	29.1122	29.8076	35.1421	25.0073
ENSG00000009790	0						coding	protein_coding	ENSG00000009790	TRAF3IP3	0	0	0	0	0	0	0	0	0	0	0	0	0	0	0
ENSG00000009830	140.1	-0.231622	0.22022	-1.04285	0.297018	0.619452	coding	protein_coding	ENSG00000009830	POMT2	149.916	217.193	133.012	81.6707	128.529	174.94	138.485	150.591	96.5792	88.4482	231.177	129.293	115.202	179.476	86.9818
ENSG00000009844	162.438	-0.149528	0.123787	-1.19514	0.232032	0.551022	coding	protein_coding	ENSG00000009844	VTA1	197.107	183.861	188.433	166.792	170.909	173.84	168.59	140.612	124.675	154.784	184.941	164.399	140.982	141.823	134.822
ENSG00000009950	12.0527	0.090169	0.204119	0.463398	0.643079	0.868747	coding	protein_coding	ENSG00000009950	MLXIPL	8.63241	16.1282	3.023	13.8035	11.116	9.90227	13.3802	5.44304	15.8039	9.31034	20.228	10.2749	17.7234	23.8464	2.17455
ENSG00000009954	1164.62	-0.509459	0.075101	-6.7826	1.18035e-11	1.03558e-09	coding	protein_coding	ENSG00000009954	BAZ1B	1326.23	1474.11	1360.35	1001.9	921.934	967.122	1186.15	1204.73	1048.32	986.896	1043.18	1051.47	1238.22	1278.92	1379.75
ENSG00000010017	161.77	-0.205114	0.1626	-1.25846	0.208224	0.522641	coding	protein_coding	ENSG00000010017	RANBP9	178.403	160.206	197.502	152.989	143.119	158.436	174.611	137.89	100.091	181.552	245.625	166.967	140.982	130.528	157.655
ENSG00000010030	0						coding	protein_coding	ENSG00000010030	ETV7	0	0	0	0	0	0	0	0	0	0	0	0	0	0	0
ENSG00000010072	78.8432	-0.534293	0.205766	-2.59991	0.00932479	0.0719117	coding	protein_coding	ENSG00000010072	SPRTN	104.452	70.9639	116.889	50.6129	66.6961	55.0126	113.731	55.3376	54.4356	74.4827	75.1324	78.7743	97.4788	90.3654	78.2836
ENSG00000010165	186.984	0.123271	0.186925	0.659509	0.509569	0.790752	coding	protein_coding	ENSG00000010165	METTL13	205.739	150.529	177.349	263.417	164.656	172.74	163.907	191.414	186.135	129.181	225.397	172.105	149.038	209.598	243.549
ENSG00000010219	44.1302	0.150561	0.209141	0.720712	0.471087	0.761672	coding	protein_coding	ENSG00000010219	DYRK4	37.6949	41.9332	45.3449	34.5088	53.4958	55.0126	47.4996	45.3587	43.8997	41.8965	66.4633	37.6747	24.1683	48.9479	38.0545
ENSG00000010244	814.95	-0.283863	0.101632	-2.79347	0.00521451	0.0470813	coding	protein_coding	ENSG00000010244	ZNF207	932.301	801.032	908.914	743.089	666.961	744.871	746.614	795.592	814.778	813.491	768.662	718.387	788.692	1031.67	949.189
ENSG00000010256	414.26	-0.0338868	0.184244	-0.184535	0.853594	0.956248	coding	protein_coding	ENSG00000010256	UQCRC1	366.59	412.881	440.35	370.394	493.273	315.772	334.504	492.596	438.997	324.698	647.295	387.878	454.364	336.36	397.942
ENSG00000010270	129.253	0.0504873	0.146208	0.349905	0.72641	0.905894	coding	protein_coding	ENSG00000010270	STARD3NL	128.623	136.552	141.073	149.538	147.982	122.128	119.753	120.654	87.7993	131.509	138.706	125.868	116.813	154.374	117.425
ENSG00000010278	281.903	0.543412	0.111201	4.8864	1.02698e-06	3.50036e-05	coding	protein_coding	ENSG00000010278	CD9	218.112	231.17	250.909	299.076	391.145	343.279	321.793	302.996	289.738	259.526	274.522	252.591	264.24	259.801	269.644
ENSG00000010282	0						coding	protein_coding	ENSG00000010282	HHATL	0	0	0	0	0	0	0	0	0	0	0	0	0	0	0
ENSG00000010292	789.409	-0.228228	0.18976	-1.20644	0.227647	0.546083	coding	protein_coding	ENSG00000010292	NCAPD2	799.074	930.057	747.687	717.782	771.173	525.921	742.6	664.959	935.941	534.181	1242.57	728.662	717.799	1021.63	761.091
ENSG00000010295	5.52865	0.317656	0.20393	1.50345	0.132722	0.407659	coding	protein_coding	ENSG00000010295	IFFO1	4.31621	3.22563	4.03066	4.60117	6.25276	14.3033	4.68306	7.25739	5.26796	5.81896	11.5588	3.42497	2.41683	2.51015	3.26182
ENSG00000010310	6.63338	0.0881317	0.129923	0.987828	0.323237	0.644795	coding	protein_coding	ENSG00000010310	GIPR	3.16522	2.15042	1.00767	3.45088	13.2003	1.10025	1.33802	0.907174	29.8518	2.32758	26.0074	0	1.61122	2.51015	10.8727
ENSG00000010318	20.0175	0.0437566	0.225206	0.173783	0.862036	0.959593	coding	protein_coding	ENSG00000010318	PHF7	19.2791	17.2034	14.1073	23.0058	18.0635	13.203	30.1054	15.422	19.3158	13.9655	20.228	23.1185	31.4188	20.0812	21.7455
ENSG00000010319	0.0796614	-0.00285532	0.0419823	-0.0700196	0.944178		coding	protein_coding	ENSG00000010319	SEMA3G	0.287747	0	0	0	0	0	0	0.907174	0	0	0	0	0	0	0
ENSG00000010322	87.8453	-0.0971373	0.225168	-0.440431	0.659625	0.877395	coding	protein_coding	ENSG00000010322	NISCH	105.315	95.6938	58.4446	97.7748	86.8438	45.1104	77.605	129.726	107.115	76.8103	49.125	127.58	138.565	66.519	55.4509
ENSG00000010327	0						coding	protein_coding	ENSG00000010327	STAB1	0	0	0	0	0	0	0	0	0	0	0	0	0	0	0
ENSG00000010361	13.209	-0.157937	0.225355	-0.726887	0.467295	0.759676	coding	protein_coding	ENSG00000010361	FUZ	13.2364	17.2034	11.0843	17.2544	6.94751	8.80202	10.7041	16.3291	5.26796	12.8017	23.1177	14.5561	12.8898	13.8058	14.1345
ENSG00000010379	0.26763	0.009243	0.0421022	0.300684	0.763656		coding	protein_coding	ENSG00000010379	SLC6A13	0	0	0	0	0	1.10025	2.00703	0.907174	0	0	0	0	0	0	0
ENSG00000010404	737.739	0.285953	0.0888932	3.21702	0.0012953	0.0157621	coding	protein_coding	ENSG00000010404	IDS	703.254	617.171	712.419	844.314	847.596	813.087	705.135	728.461	748.05	823.965	745.545	667.869	667.045	686.526	755.655
ENSG00000010438	7.23593	0.187344	0.20776	0.863594	0.387811	0.701089	coding	protein_coding	ENSG00000010438	PRSS3	6.61818	11.8273	3.023	19.555	6.25276	6.60152	4.68306	3.6287	8.77993	6.98275	2.88971	5.13745	7.25049	8.78553	6.52364
ENSG00000010539	40.4775	0.0867993	0.219213	0.39967	0.6894	0.890363	coding	protein_coding	ENSG00000010539	ZNF200	37.4071	51.6101	35.2683	72.4684	34.0428	30.8071	36.1265	48.9874	52.6796	30.2586	26.0074	26.5435	44.3086	50.203	30.4436
ENSG00000010610	0.0909173	0.0105724	0.0419945	0.300687	0.763653		coding	protein_coding	ENSG00000010610	CD4	0	0	0	0	0.694751	0	0.669009	0	0	0	0	0	0	0	0
ENSG00000010626	39.5064	0.034762	0.212719	0.162166	0.871175	0.962522	coding	protein_coding	ENSG00000010626	LRRC23	34.8174	34.4067	47.3603	32.2082	40.9903	46.2106	34.7885	53.5233	28.0958	33.75	34.6765	45.3808	54.7815	31.3769	40.2291
ENSG00000010671	0.222556	0	0.0420288	0	1		coding	protein_coding	ENSG00000010671	BTK	0	0	0	0	0	0	0	0	0	1.16379	0	0	0	0	2.17455
ENSG00000010704	74.1186	-0.0375249	0.225121	-0.165121	0.868849	0.962136	coding	protein_coding	ENSG00000010704	HFE	76.5407	72.0391	85.6515	95.4742	59.0538	67.1154	52.8517	110.675	42.1437	46.5517	20.228	113.024	70.8937	150.609	48.9273
ENSG00000010803	106.102	-0.105648	0.215414	-0.485385	0.627404	0.861953	coding	protein_coding	ENSG00000010803	SCMH1	128.911	87.0921	135.027	150.688	77.1173	89.1205	83.6261	102.511	126.431	178.06	75.1324	79.6305	92.6452	86.6002	98.9418
ENSG00000010810	10.9116	0.574455	0.211489	3.15393	0.0016109	0.0187669	coding	protein_coding	ENSG00000010810	FYN	2.58972	2.15042	4.03066	9.20234	12.5055	19.8045	10.0351	14.5148	19.3158	17.4569	17.3382	5.13745	4.83366	6.27538	18.4836
ENSG00000010818	274.728	0.0740097	0.207223	0.361008	0.718093	0.903231	coding	protein_coding	ENSG00000010818	HIVEP2	140.421	430.084	159.211	204.752	425.882	235.454	190.667	146.055	163.307	621.465	161.824	201.217	153.066	701.587	185.924
ENSG00000010932	0.0604783	0	0.0419558	0	1		coding	protein_coding	ENSG00000010932	FMO1	0	0	0	0	0	0	0	0.907174	0	0	0	0	0	0	0
ENSG00000011007	248.984	0.00439918	0.119533	0.0390287	0.968867	0.99373	coding	protein_coding	ENSG00000011007	TCEB3	260.987	280.63	233.778	254.215	252.194	272.863	265.596	238.587	201.938	268.836	234.066	255.16	215.904	267.331	232.676
ENSG00000011009	113.126	-0.0206795	0.1745	-0.116402	0.907334	0.974128	coding	protein_coding	ENSG00000011009	LYPLA2	141.859	94.6185	107.82	92.0234	124.36	126.529	111.724	100.696	135.211	126.853	112.699	122.443	91.8396	85.3451	122.862
ENSG00000011021	51.6515	-0.0593107	0.208375	-0.285249	0.775453	0.926879	coding	protein_coding	ENSG00000011021	CLCN6	50.6435	34.4067	74.5672	51.7631	59.7486	37.4086	52.8517	42.6372	35.1197	55.862	46.2353	59.937	62.8376	47.6929	63.0618
ENSG00000011028	394.739	0.233145	0.168262	1.38563	0.16586	0.4627	coding	protein_coding	ENSG00000011028	MRC2	351.339	346.218	381.905	434.81	383.502	492.913	406.757	322.954	321.345	372.414	476.802	369.897	396.36	573.569	290.302
ENSG00000011052	20.3097	0.219843	0.225051	0.998063	0.318249	0.63975	coding	protein_coding	ENSG00000011052	NME2	11.5099	9.6769	27.207	24.1561	11.116	33.0076	15.3872	15.422	12.2919	24.4396	11.5588	17.1248	26.5851	23.8464	41.3164
ENSG00000011083	0.431872	0.0334639	0.0484885	0.475599	0.63436		coding	protein_coding	ENSG00000011083	SLC6A7	0.863241	0	0	1.15029	0	3.30076	0	0	0	1.16379	0	0	0	0	0
ENSG00000011105	70.9167	0.557674	0.211698	2.64101	0.00826597	0.0655604	coding	protein_coding	ENSG00000011105	TSPAN9	65.3186	48.3845	29.2223	106.977	78.5068	75.9174	92.3232	89.8102	66.7275	95.431	49.125	57.3682	80.561	71.5393	56.5382
ENSG00000011114	359.332	0.163793	0.131234	1.24968	0.211417	0.526273	coding	protein_coding	ENSG00000011114	BTBD7	342.707	361.271	400.043	373.845	359.881	517.119	372.638	348.355	300.274	357.284	294.75	360.478	324.661	336.36	340.316
ENSG00000011132	21.871	0.0575971	0.216867	0.26151	0.793699	0.935237	coding	protein_coding	ENSG00000011132	APBA3	29.0625	19.3538	18.138	16.1041	25.011	34.1078	17.3942	20.865	8.77993	15.1293	40.4559	18.8373	45.9198	11.2957	7.61091
ENSG00000011143	37.1037	-0.0145224	0.22194	-0.0616377	0.950851	0.988697	coding	protein_coding	ENSG00000011143	MKS1	24.7462	65.5879	32.2453	33.3585	27.0953	58.3134	32.7814	34.4726	54.4356	15.1293	49.125	32.5372	25.7795	58.9885	11.96
ENSG00000011198	46.0689	-0.0273434	0.20629	-0.125143	0.90041	0.972013	coding	protein_coding	ENSG00000011198	ABHD5	44.8885	58.0614	52.3986	37.9596	65.3066	44.0101	43.4856	45.3587	29.8518	36.0776	40.4559	60.7932	46.7254	38.9073	46.7527
ENSG00000011201	0.409725	-0.034995	0.0571579	-0.584782	0.558694		coding	protein_coding	ENSG00000011201	KAL1	2.01423	0	0	0	0	0	0	0.907174	0	1.16379	0	0	0.80561	1.25508	0
ENSG00000011243	104.425	-0.103476	0.192994	-0.540316	0.588979	0.83913	coding	protein_coding	ENSG00000011243	AKAP8L	112.797	117.198	84.6439	83.9713	106.297	95.722	137.816	95.2533	100.091	111.724	46.2353	109.599	111.98	111.702	141.345
ENSG00000011258	75.0495	0.0478808	0.185894	0.243379	0.807712	0.94136	coding	protein_coding	ENSG00000011258	MBTD1	70.498	61.287	56.4292	73.6187	69.4751	55.0126	74.929	57.152	59.7035	103.578	118.478	103.605	90.2283	50.203	81.5455
ENSG00000011260	186.857	-0.420043	0.138859	-3.01873	0.00253838	0.0270247	coding	protein_coding	ENSG00000011260	UTP18	224.443	212.892	233.778	147.237	175.077	160.637	169.928	189.599	129.943	180.388	182.052	189.23	189.318	176.966	241.375
ENSG00000011275	373.333	0.336065	0.126782	2.65172	0.00800835	0.0642703	coding	protein_coding	ENSG00000011275	RNF216	281.417	380.625	325.476	455.516	409.208	399.392	377.99	390.085	426.705	379.396	404.559	353.628	314.994	298.708	402.291
ENSG00000011295	241.467	0.0695881	0.117593	0.593786	0.552655	0.816602	coding	protein_coding	ENSG00000011295	TTC19	265.878	217.193	242.847	253.064	263.311	255.259	228.132	207.743	219.498	233.922	251.405	264.579	274.713	225.914	218.542
ENSG00000011304	1853.48	-0.226873	0.115053	-1.97101	0.0487231	0.224183	coding	protein_coding	ENSG00000011304	PTBP1	2123	2119.24	2043.54	1658.72	1885.55	1762.6	1806.32	1768.99	1671.7	1323.23	1970.78	1741.6	1709.5	2170.02	2047.33
ENSG00000011332	17.9008	-0.220876	0.218907	-1.12394	0.261038	0.581322	coding	protein_coding	ENSG00000011332	DPF1	15.2506	17.2034	19.1456	8.05204	14.5898	8.80202	17.3942	11.7933	36.8757	39.5689	11.5588	11.1311	12.8898	30.1218	14.1345
ENSG00000011347	11.7463	0.365704	0.203199	1.7099	0.0872843	0.320644	coding	protein_coding	ENSG00000011347	SYT7	6.61818	9.6769	8.06132	17.2544	13.2003	26.4061	4.01405	10.8861	43.8997	6.98275	5.77942	6.84994	6.44488	2.51015	7.61091
ENSG00000011376	123.196	-0.323387	0.191582	-1.68994	0.0910392	0.328411	coding	protein_coding	ENSG00000011376	LARS2	150.204	136.552	121.927	69.0175	134.782	99.0227	143.168	164.199	121.163	93.1034	109.809	113.024	96.6732	126.763	168.527
ENSG00000011405	342.698	0.115506	0.147916	0.781585	0.434459	0.73641	coding	protein_coding	ENSG00000011405	PIK3C2A	301.271	395.678	314.392	404.903	301.522	400.492	331.828	313.882	300.274	406.164	323.647	360.478	381.859	346.401	257.684
ENSG00000011422	257.456	0.526692	0.137375	3.83226	0.00012697	0.0023077	coding	protein_coding	ENSG00000011422	PLAUR	222.716	201.064	234.786	266.868	316.806	407.093	297.04	276.688	245.838	230.431	182.052	227.76	251.35	261.056	240.287
ENSG00000011426	1362.79	-0.352387	0.106428	-3.30913	0.000935878	0.0121978	coding	protein_coding	ENSG00000011426	ANLN	1589.23	1808.5	1545.76	1349.29	1190.11	1275.19	1219.6	1238.29	1155.44	1232.46	1280.14	1445.34	1500.85	1488.52	1123.15
ENSG00000011451	227.614	0.10242	0.162618	0.630526	0.52835	0.803665	coding	protein_coding	ENSG00000011451	WIZ	211.782	281.705	216.648	195.55	300.132	269.562	204.717	258.545	208.962	158.276	193.61	225.192	201.403	243.485	244.636
ENSG00000011454	225.287	-0.617733	0.141033	-4.39124	1.12708e-05	0.000287598	coding	protein_coding	ENSG00000011454	RABGAP1	262.138	269.878	213.625	150.688	164.656	144.133	280.315	244.03	244.082	300.258	236.956	211.492	207.847	204.577	244.636
ENSG00000011465	1.10973	-0.215863	0.118369	-2.10734	0.0350882		coding	protein_coding	ENSG00000011465	DCN	2.01423	2.15042	3.023	0	0	0	1.33802	1.81435	0	1.16379	0	1.71248	0	1.25508	2.17455
ENSG00000011478	38.0896	0.183544	0.214975	0.8525	0.393937	0.704456	coding	protein_coding	ENSG00000011478	QPCTL	27.9115	36.5572	48.3679	32.2082	52.8011	47.3109	40.8095	40.8228	49.1676	27.931	43.3456	35.9622	20.1403	28.8667	39.1418
ENSG00000011485	364.883	-0.236602	0.144946	-1.63419	0.102219	0.352118	coding	protein_coding	ENSG00000011485	PPP5C	403.709	331.165	413.143	345.088	299.438	312.472	503.764	358.334	430.217	323.534	343.875	255.16	364.136	454.337	334.88
ENSG00000011523	82.9955	-0.0249877	0.177426	-0.144456	0.88514	0.966913	coding	protein_coding	ENSG00000011523	CEP68	82.5834	75.2647	85.6515	71.3181	84.0648	82.5189	74.26	103.418	98.3352	70.9913	69.353	95.0429	87.0059	64.0088	101.116
ENSG00000011566	110.095	0.160525	0.205621	0.774851	0.438428	0.739716	coding	protein_coding	ENSG00000011566	MAP4K3	135.241	130.1	112.858	103.526	120.192	220.051	92.9922	84.3672	57.9475	93.1034	98.2501	136.143	114.397	81.5799	70.6727
ENSG00000011590	0						coding	protein_coding	ENSG00000011590	ZBTB32	0	0	0	0	0	0	0	0	0	0	0	0	0	0	0
ENSG00000011600	0						coding	protein_coding	ENSG00000011600	TYROBP	0	0	0	0	0	0	0	0	0	0	0	0	0	0	0
ENSG00000011638	9.13589	0.390148	0.222825	1.7364	0.0824938	0.309037	coding	protein_coding	ENSG00000011638	TMEM159	6.90593	5.37605	7.05366	8.05204	16.674	12.1028	10.0351	9.97891	12.2919	11.6379	5.77942	4.28121	10.4729	8.78553	7.61091
ENSG00000011677	0.115099	-0.0242982	0.0420371	-0.370597	0.710938		coding	protein_coding	ENSG00000011677	GABRA3	1.72648	0	0	0	0	0	0	0	0	0	0	0	0	0	0
ENSG00000012048	309.264	-0.601844	0.174133	-3.46374	0.000532722	0.00760206	coding	protein_coding	ENSG00000012048	BRCA1	410.327	362.346	340.591	268.018	207.73	194.745	347.885	380.106	268.666	245.56	271.633	430.69	332.717	248.505	329.444
ENSG00000012061	246.04	0.206287	0.141403	1.45741	0.145002	0.428642	coding	protein_coding	ENSG00000012061	ERCC1	234.802	198.914	212.617	219.706	272.342	269.562	268.941	242.215	252.862	212.974	320.758	215.773	289.214	230.934	248.985
ENSG00000012124	1.39222	0.0612478	0.103603	1.03781	0.299359		coding	protein_coding	ENSG00000012124	CD22	0.287747	0	0	0	2.779	0	0	0	0	1.16379	2.88971	6.84994	0.80561	5.0203	1.08727
ENSG00000012171	44.5339	0.33779	0.222789	1.53417	0.124987	0.394065	other	processed_transcript	ENSG00000012171	SEMA3B	34.5296	46.2341	15.115	37.9596	45.8535	60.5139	76.936	78.017	36.8757	39.5689	52.0147	51.3745	24.1683	35.1421	33.7055
ENSG00000012174	266.527	-0.323081	0.110716	-2.91286	0.00358132	0.0353236	coding	protein_coding	ENSG00000012174	MBTPS2	293.214	324.714	316.407	250.764	252.889	226.652	231.477	230.422	230.034	283.965	286.081	222.623	278.741	269.841	300.087
ENSG00000012211	57.8771	0.0551513	0.194507	0.291012	0.771042	0.926041	coding	protein_coding	ENSG00000012211	PRICKLE3	52.0822	54.8357	81.6209	73.6187	51.4115	72.6167	59.5418	63.5022	45.6556	60.5172	40.4559	59.937	51.559	46.4378	54.3636
ENSG00000012223	0						coding	protein_coding	ENSG00000012223	LTF	0	0	0	0	0	0	0	0	0	0	0	0	0	0	0
ENSG00000012232	183.859	0.0829179	0.218225	0.375041	0.70763	0.898677	coding	protein_coding	ENSG00000012232	EXTL3	162.289	207.516	246.878	243.862	129.224	301.469	220.773	109.768	149.259	193.19	72.2427	153.267	153.066	193.282	221.804
ENSG00000012504	7.08583	-0.000122435	0.190407	0.00697544	0.994434	0.998313	coding	protein_coding	ENSG00000012504	NR1H4	6.61818	7.52647	9.06899	16.1041	4.1685	3.30076	20.7393	11.7933	3.51197	1.16379	0	3.42497	3.22244	11.2957	4.34909
ENSG00000012660	682.67	0.257531	0.089975	2.86266	0.00420105	0.0401004	coding	protein_coding	ENSG00000012660	ELOVL5	623.548	636.525	631.806	852.366	739.909	687.658	697.107	693.081	614.595	665.689	774.442	686.706	646.905	676.485	613.222
ENSG00000012779	2.94823	0.0553652	0.130268	0.461727	0.644277		coding	protein_coding	ENSG00000012779	ALOX5	1.72648	1.07521	3.023	6.90175	1.3895	1.10025	1.33802	1.81435	15.8039	2.32758	2.88971	0	4.83366	0	0
ENSG00000012817	144.513	-0.223166	0.200255	-1.11469	0.264985	0.585724	coding	protein_coding	ENSG00000012817	KDM5D	140.421	168.808	174.326	156.44	129.224	104.524	200.703	109.768	80.7754	176.896	141.596	172.961	125.675	119.232	166.353
ENSG00000012822	64.8953	0.0761862	0.224616	0.332135	0.739787	0.911696	coding	protein_coding	ENSG00000012822	CALCOCO1	75.9652	66.6631	78.5979	40.2602	118.108	82.5189	40.8095	78.9241	68.4835	36.0776	57.7942	83.9117	62.8376	31.3769	51.1018
ENSG00000012963	144.378	-0.106354	0.178237	-0.612835	0.539986	0.80958	coding	protein_coding	ENSG00000012963	UBR7	105.028	133.326	134.019	125.382	117.413	92.4212	168.59	123.376	224.766	164.095	144.485	160.117	150.649	188.261	133.735
ENSG00000012983	253.876	0.12069	0.182402	0.661801	0.508098	0.789074	coding	protein_coding	ENSG00000012983	MAP4K5	219.551	290.307	218.663	223.157	277.206	305.87	312.427	232.237	161.551	279.31	271.633	280.847	320.633	207.087	207.669
ENSG00000013016	27.5368	-0.325287	0.221674	-1.48643	0.137164	0.416119	coding	protein_coding	ENSG00000013016	EHD3	30.7889	27.9555	33.2529	29.9076	20.8425	12.1028	21.4083	38.1013	31.6078	20.9483	37.5662	25.6873	26.5851	22.5914	33.7055
ENSG00000013275	568.195	0.0268789	0.101152	0.266314	0.789997	0.933737	coding	protein_coding	ENSG00000013275	PSMC4	570.602	537.605	606.614	608.505	580.117	561.129	588.059	563.355	607.571	515.56	598.169	530.87	461.615	588.63	604.524
ENSG00000013288	142.978	0.0394552	0.134068	0.301843	0.762772	0.92289	coding	protein_coding	ENSG00000013288	MAN2B2	151.93	155.906	149.134	164.492	145.898	162.837	122.429	124.283	114.139	123.362	158.934	139.567	119.23	158.139	154.393
ENSG00000013293	7.82145	0.0273367	0.167709	0.209508	0.834051	0.950148	coding	protein_coding	ENSG00000013293	SLC7A14	3.45296	3.22563	4.03066	3.45088	5.55801	3.30076	4.01405	2.72152	63.2155	4.65517	0	5.13745	6.44488	3.76523	4.34909
ENSG00000013297	6.59485	-0.259801	0.203022	-1.50433	0.132497	0.407263	coding	protein_coding	ENSG00000013297	CLDN11	5.46719	9.6769	6.04599	2.30058	4.1685	2.20051	4.01405	8.16457	5.26796	4.65517	2.88971	13.6999	6.44488	16.316	7.61091
ENSG00000013306	318.551	0.214212	0.112451	1.90461	0.0568314	0.245931	coding	protein_coding	ENSG00000013306	SLC25A39	293.502	296.758	283.154	295.625	350.849	376.286	294.364	343.819	363.489	318.879	257.184	315.953	326.272	341.38	320.745
ENSG00000013364	484.234	0.154592	0.159618	0.969105	0.332493	0.653897	coding	protein_coding	ENSG00000013364	MVP	358.533	418.257	547.162	527.984	491.883	475.309	470.982	441.794	598.791	586.551	534.596	422.127	472.893	366.482	550.16
ENSG00000013374	312.913	-0.100043	0.138972	-0.716942	0.47341	0.763612	coding	protein_coding	ENSG00000013374	NUB1	361.986	342.992	327.491	350.839	311.943	295.968	340.525	293.017	251.106	249.052	274.522	352.772	294.853	282.392	364.236
ENSG00000013375	164.068	0.228948	0.224972	1.03275	0.301719	0.623395	coding	protein_coding	ENSG00000013375	PGM3	160.851	82.7912	128.981	238.11	169.519	93.5215	106.372	358.334	298.518	218.793	153.155	158.405	114.397	112.957	66.3236
ENSG00000013392	16.2593	0.143212	0.225928	0.62792	0.530056	0.804452	coding	protein_coding	ENSG00000013392	RWDD2A	19.8545	13.9777	10.0767	14.9538	22.9268	17.604	24.7533	16.3291	21.0718	8.14655	11.5588	20.5498	19.3346	7.53045	15.2218
ENSG00000013441	70.745	0.188846	0.185595	1.01582	0.309717	0.631293	coding	protein_coding	ENSG00000013441	CLK1	73.3755	55.911	62.4752	80.5204	75.0331	74.8172	75.598	54.4304	50.9236	103.578	52.0147	84.768	72.5049	77.8147	67.4109
ENSG00000013503	82.3501	-0.276752	0.216534	-1.30941	0.190395	0.496348	coding	protein_coding	ENSG00000013503	POLR3B	81.7202	88.1673	75.5749	56.3643	60.4433	63.8147	65.5629	60.7807	140.479	147.802	95.3604	60.7932	72.5049	77.8147	88.0691
ENSG00000013523	61.7397	0.0915713	0.196598	0.460841	0.644913	0.869611	coding	protein_coding	ENSG00000013523	ANGEL1	54.3842	48.3845	63.4829	57.5146	55.5801	68.2157	49.5066	71.6668	61.4595	70.9913	40.4559	70.2119	78.1442	50.203	85.8945
ENSG00000013561	219.819	-0.206962	0.159049	-1.30307	0.19255	0.500405	coding	protein_coding	ENSG00000013561	RNF14	235.089	262.351	205.564	247.313	185.498	162.837	212.745	216.815	217.742	215.302	158.934	281.704	233.627	233.444	228.327
ENSG00000013563	103.326	0.288303	0.169814	1.6989	0.0893372	0.325077	coding	protein_coding	ENSG00000013563	DNASE1L1	93.2301	84.9416	114.874	150.688	122.276	99.0227	85.6331	111.582	100.091	74.4827	112.699	82.1993	110.369	106.681	101.116
ENSG00000013573	232.655	-0.125119	0.151031	-0.831314	0.405796	0.714159	coding	protein_coding	ENSG00000013573	DDX11	232.787	260.201	212.617	242.712	169.519	229.953	261.582	267.616	298.518	253.707	161.824	210.636	244.1	247.25	196.796
ENSG00000013583	110.054	0.315064	0.139989	2.25766	0.0239669	0.139951	coding	protein_coding	ENSG00000013583	HEBP1	111.934	106.446	109.835	148.388	134.782	138.632	99.0133	92.5318	71.9954	101.25	124.257	94.1867	102.312	105.426	109.815
ENSG00000013588	1485.18	1.53536	0.11049	13.8878	7.5123e-44	5.6196e-41	coding	protein_coding	ENSG00000013588	GPRC5A	799.361	899.951	706.373	2283.33	2720.64	2484.37	1594.92	1290.91	1243.24	1485	1768.5	1479.59	1143.97	1152.16	1225.36
ENSG00000013619	140.659	1.58003	0.172452	9.1033	8.76263e-20	1.97688e-17	coding	protein_coding	ENSG00000013619	MAMLD1	76.253	53.7605	59.4522	246.163	245.247	244.256	155.879	123.376	158.039	158.276	127.147	126.724	115.202	141.823	78.2836
ENSG00000013725	0.456494	0.0131595	0.0422806	0.174458	0.861506		coding	protein_coding	ENSG00000013725	CD6	1.43874	0	1.00767	0	0	4.40101	0	0	0	0	0	0	0	0	0
ENSG00000013810	312.236	-0.54622	0.174568	-3.13937	0.00169309	0.0195007	coding	protein_coding	ENSG00000013810	TACC3	437.088	315.037	308.346	236.96	238.299	193.644	337.18	195.042	324.857	335.172	251.405	385.309	397.166	346.401	381.633
ENSG00000014123	87.1397	-0.087849	0.152523	-0.572025	0.567305	0.826723	coding	protein_coding	ENSG00000014123	UFL1	87.1874	98.9194	94.7205	101.226	77.8121	82.5189	77.605	78.017	68.4835	96.5948	80.9118	95.8991	93.4508	87.8553	85.8945
ENSG00000014138	180.393	-0.113229	0.164597	-0.68447	0.493678	0.779022	coding	protein_coding	ENSG00000014138	POLA2	195.668	182.786	209.594	225.457	172.993	138.632	148.52	180.528	189.647	115.215	167.603	158.405	179.651	242.229	198.971
ENSG00000014164	143.401	0.0294763	0.143973	0.204815	0.837717	0.950956	coding	protein_coding	ENSG00000014164	ZC3H3	153.657	140.853	128.981	156.44	154.235	125.429	140.492	136.983	135.211	174.569	138.706	130.149	142.593	164.415	128.298
ENSG00000014216	441.606	-0.302582	0.133442	-2.2627	0.0236543	0.138501	coding	protein_coding	ENSG00000014216	CAPN1	462.697	545.132	605.607	463.568	404.345	408.194	479.679	409.136	395.097	265.345	404.559	329.653	450.336	466.888	533.851
ENSG00000014257	0.283622	-0.0237167	0.0420627	-0.529579	0.596404		coding	protein_coding	ENSG00000014257	ACPP	0	1.07521	2.01533	0	0	0	0	0	0	1.16379	0	0	0	0	0
ENSG00000014641	398.03	-0.0606439	0.122959	-0.491595	0.623006	0.859468	coding	protein_coding	ENSG00000014641	MDH1	416.37	374.173	484.687	361.192	472.43	378.487	315.772	375.57	349.441	407.327	369.883	425.552	447.114	405.389	387.069
ENSG00000014824	290.656	0.0335092	0.126015	0.269688	0.7874	0.932999	coding	protein_coding	ENSG00000014824	SLC30A9	326.593	310.736	299.277	366.943	316.112	281.665	311.758	291.203	324.857	281.638	213.838	311.672	223.96	272.351	227.24
ENSG00000014914	57.6251	-0.0142627	0.195471	-0.0569063	0.95462	0.990538	coding	protein_coding	ENSG00000014914	MTMR11	67.9083	68.8135	60.4599	67.8672	58.3591	70.4162	55.5277	61.6878	63.2155	31.4224	63.5736	40.2434	70.8937	42.6726	41.3164
ENSG00000014919	144.012	-0.473991	0.176045	-2.69831	0.00696923	0.058096	coding	protein_coding	ENSG00000014919	COX15	158.261	166.658	170.295	128.833	112.55	88.0202	109.717	152.405	147.503	136.164	202.28	119.874	185.29	151.864	130.473
ENSG00000015133	85.3996	-0.130809	0.226074	-0.610166	0.541752	0.810981	coding	protein_coding	ENSG00000015133	CCDC88C	79.7059	64.5126	92.7052	56.3643	52.1063	85.8197	115.069	119.747	68.4835	76.8103	205.169	41.0996	120.842	51.4581	51.1018
ENSG00000015153	104.029	-0.301998	0.153744	-1.9564	0.0504175	0.229748	coding	protein_coding	ENSG00000015153	YAF2	108.481	141.928	116.889	78.2199	100.739	104.524	97.6753	87.9959	82.5314	100.086	124.257	104.462	103.924	105.426	103.291
ENSG00000015171	527.526	-0.261578	0.0809156	-3.23019	0.00123709	0.0152558	coding	protein_coding	ENSG00000015171	ZMYND11	585.853	627.923	577.392	514.181	493.968	474.209	491.721	528.882	488.164	569.094	482.581	515.458	501.895	523.366	538.2
ENSG00000015285	2.28306	0.00373291	0.109552	0.0155438	0.987598		coding	protein_coding	ENSG00000015285	WAS	1.72648	0	2.01533	1.15029	0.694751	2.20051	0.669009	2.72152	0	0	14.4485	0	6.44488	0	2.17455
ENSG00000015413	0.360106	0.0108806	0.0567151	0.172378	0.86314		coding	protein_coding	ENSG00000015413	DPEP1	0.287747	0	0	1.15029	0	0	0	0	0	1.16379	0	1.71248	0	0	1.08727
ENSG00000015475	199.716	0.151572	0.153792	0.983994	0.325119	0.646553	coding	protein_coding	ENSG00000015475	BID	191.064	155.906	190.449	181.746	240.384	183.742	188.66	229.515	265.154	212.974	202.28	208.923	203.819	144.334	196.796
ENSG00000015479	1330.52	-0.281302	0.0925652	-3.03871	0.00237592	0.0256603	coding	protein_coding	ENSG00000015479	MATR3	1416.87	1587.01	1449.02	1246.92	1160.23	1222.38	1373.47	1166.63	1304.7	1287.15	1141.43	1456.47	1422.71	1449.61	1273.2
ENSG00000015520	0.224425	-0.0109903	0.0420464	-0.269337	0.78767		coding	protein_coding	ENSG00000015520	NPC1L1	0.287747	0	1.00767	0	0	0	0	0.907174	0	1.16379	0	0	0	0	0
ENSG00000015532	101.55	0.00295308	0.175924	0.012634	0.98992	0.997286	coding	protein_coding	ENSG00000015532	XYLT2	96.683	95.6938	90.6899	104.677	91.0123	89.1205	83.6261	82.5528	84.2873	109.396	193.61	100.18	98.2844	90.3654	113.076
ENSG00000015568	193.547	-0.110767	0.174651	-0.634916	0.525483	0.80205	coding	protein_coding	ENSG00000015568	RGPD5	201.998	202.14	200.525	151.839	186.888	211.248	198.696	219.536	161.551	225.776	132.927	212.348	207.847	143.079	246.811
ENSG00000015592	0.076266	-0.00285532	0.0419823	-0.0700194	0.944178		coding	protein_coding	ENSG00000015592	STMN4	0.287747	0	0	0	0	0	0	0	0	0	0	0.856242	0	0	0
ENSG00000015676	236.165	-0.154442	0.133619	-1.15209	0.249283	0.568982	coding	protein_coding	ENSG00000015676	NUDCD3	243.146	288.156	259.978	232.359	230.657	236.554	187.322	256.73	177.355	246.724	303.419	252.591	203.014	230.934	193.535
ENSG00000016082	0						coding	protein_coding	ENSG00000016082	ISL1	0	0	0	0	0	0	0	0	0	0	0	0	0	0	0
ENSG00000016391	61.0571	-0.0912868	0.209229	-0.435278	0.663361	0.879345	coding	protein_coding	ENSG00000016391	CHDH	60.1391	63.4374	70.5366	48.3123	64.6118	62.7144	65.5629	63.5022	52.6796	55.862	46.2353	58.2245	45.9198	109.192	48.9273
ENSG00000016402	1.21769	0.00542701	0.105974	0.0800609	0.936189		coding	protein_coding	ENSG00000016402	IL20RA	0.287747	0	2.01533	0	2.08425	0	1.33802	1.81435	0	0	2.88971	5.13745	1.61122	0	1.08727
ENSG00000016490	0						coding	protein_coding	ENSG00000016490	CLCA1	0	0	0	0	0	0	0	0	0	0	0	0	0	0	0
ENSG00000016602	0						coding	protein_coding	ENSG00000016602	CLCA4	0	0	0	0	0	0	0	0	0	0	0	0	0	0	0
ENSG00000016864	100.739	-0.376435	0.189444	-1.99152	0.0464238	0.216944	coding	protein_coding	ENSG00000016864	GLT8D1	101.287	140.853	107.82	85.1216	88.9281	72.6167	84.9641	129.726	79.0194	112.888	72.2427	122.443	124.87	99.1509	89.1564
ENSG00000017260	356.228	-0.0375393	0.13369	-0.276713	0.782001	0.929334	coding	protein_coding	ENSG00000017260	ATP2C1	397.091	396.753	432.288	419.857	445.335	322.374	335.173	270.338	252.862	414.31	355.434	319.378	319.022	308.748	354.451
ENSG00000017373	16.8873	-0.178535	0.204721	-0.89907	0.368615	0.685481	coding	protein_coding	ENSG00000017373	SRCIN1	20.1423	17.2034	20.1533	6.90175	15.2845	14.3033	43.4856	5.44304	8.77993	41.8965	8.66912	33.3934	6.44488	2.51015	8.69818
ENSG00000017427	3.12942	-0.180769	0.157318	-0.988824	0.322749		coding	protein_coding	ENSG00000017427	IGF1	3.74071	4.30084	9.06899	0	1.3895	6.60152	2.00703	0.907174	5.26796	1.16379	0	3.42497	5.63927	1.25508	2.17455
ENSG00000017483	1.34288	-0.0143272	0.0739537	-0.300415	0.763861		coding	protein_coding	ENSG00000017483	SLC38A5	0	0	2.01533	0	0.694751	0	0.669009	0	0	0	11.5588	0.856242	0	0	4.34909
ENSG00000017621	5.0773	0.0475234	0.178811	0.267137	0.789364	0.933611	coding	protein_coding	ENSG00000017621	MAGIX	5.46719	4.30084	2.01533	5.75146	8.33701	0	5.35207	8.16457	5.26796	4.65517	8.66912	11.1311	1.61122	0	5.43636
ENSG00000017797	284.423	0.212861	0.144445	1.47424	0.140416	0.421662	coding	protein_coding	ENSG00000017797	RALBP1	267.317	262.351	298.269	285.272	306.385	386.189	228.801	270.338	235.302	306.077	213.838	355.341	306.937	278.627	265.295
ENSG00000018189	59.1448	0.061761	0.220519	0.28045	0.779132	0.92826	coding	protein_coding	ENSG00000018189	RUFY3	44.0253	40.858	83.6362	47.162	65.3066	66.0152	57.5347	47.1731	54.4356	82.6293	75.1324	56.512	82.1722	55.2233	29.3564
ENSG00000018236	1269.61	0.191889	0.106527	1.80126	0.0716616	0.284346	coding	protein_coding	ENSG00000018236	CNTN1	1288.53	1093.49	1190.05	1177.9	1392.98	1550.26	1336.01	1154.83	1155.44	1539.7	1459.3	1254.39	1182.64	1118.27	1150.33
ENSG00000018280	2.60477	0.059898	0.148304	0.390876	0.695889		coding	protein_coding	ENSG00000018280	SLC11A1	1.43874	5.37605	1.00767	8.05204	1.3895	1.10025	2.67603	1.81435	1.75599	0	0	0.856242	0.80561	6.27538	6.52364
ENSG00000018408	1051.91	0.338141	0.0751399	4.50053	6.77841e-06	0.000182811	coding	protein_coding	ENSG00000018408	WWTR1	953.018	877.372	1061.07	1235.41	1231.1	1212.48	1002.84	1063.21	962.28	1052.07	1051.85	1128.53	961.093	1031.67	954.625
ENSG00000018510	420.155	-0.180935	0.158267	-1.1437	0.252749	0.572663	coding	protein_coding	ENSG00000018510	AGPS	439.678	382.775	516.932	363.492	331.396	464.307	450.912	425.465	424.949	360.776	543.265	341.641	494.645	397.859	364.236
ENSG00000018607	0.14014	-0.00274757	0.0420154	-0.0700214	0.944177		pseudo	pseudogene	ENSG00000018607	ZNF806	0.287747	0	0	0	0	0	0	1.81435	0	0	0	0	0	0	0
ENSG00000018610	194.521	0.325962	0.129653	2.51503	0.0119022	0.0853942	coding	protein_coding	ENSG00000018610	CXorf56	158.261	192.463	168.28	196.7	226.489	234.354	192.674	251.287	212.474	174.569	187.831	181.523	180.457	166.925	193.535
ENSG00000018625	0.189303	0.00115807	0.0420323	0.0341787	0.972735		coding	protein_coding	ENSG00000018625	ATP1A2	0.575494	0	0	0	0	1.10025	0	0	0	1.16379	0	0	0	0	0
ENSG00000018699	86.2529	-0.0341767	0.225826	-0.152575	0.878734	0.965032	coding	protein_coding	ENSG00000018699	TTC27	67.9083	79.5656	112.858	57.5146	83.3701	106.725	115.739	94.3461	61.4595	62.8448	63.5736	92.4742	44.3086	72.7944	178.313
ENSG00000018869	0.7788	0.0164927	0.0786137	0.200809	0.840848		coding	protein_coding	ENSG00000018869	ZNF582	0.287747	2.15042	0	1.15029	0	2.20051	0	1.81435	0	0	0	0.856242	3.22244	0	0
ENSG00000019102	0.0724848	0	0.0419558	0	1		coding	protein_coding	ENSG00000019102	VSIG2	0	0	0	0	0	0	0	0	0	0	0	0	0	0	1.08727
ENSG00000019144	162.502	-0.457894	0.220472	-2.07475	0.0380095	0.190826	coding	protein_coding	ENSG00000019144	PHLDB1	222.141	174.184	226.725	126.532	122.971	122.128	161.231	217.722	98.3352	104.741	300.53	96.7554	172.401	176.966	114.164
ENSG00000019169	0						coding	protein_coding	ENSG00000019169	MARCO	0	0	0	0	0	0	0	0	0	0	0	0	0	0	0
ENSG00000019186	5267.76	-0.394924	0.0651719	-6.06062	1.35601e-09	8.23632e-08	coding	protein_coding	ENSG00000019186	CYP24A1	5531.07	5691.09	5451.47	4418.27	3862.81	4333.89	6215.76	5756.02	5457.61	5074.13	4690	4755.57	5893.84	5813.51	6071.33
ENSG00000019485	38.7836	-0.607201	0.221702	-2.69217	0.0070988	0.059003	coding	protein_coding	ENSG00000019485	PRDM11	45.7518	70.9639	58.4446	33.3585	27.0953	26.4061	43.4856	29.9367	31.6078	29.0948	31.7868	29.9685	44.3086	17.5711	61.9745
ENSG00000019505	301.056	-0.247092	0.102426	-2.41324	0.0158114	0.104185	coding	protein_coding	ENSG00000019505	SYT13	343.57	282.78	332.529	272.619	268.174	266.261	335.173	312.975	284.47	307.241	317.868	298.829	298.076	288.667	306.611
ENSG00000019549	26.538	0.559155	0.220699	2.47973	0.013148	0.0914698	coding	protein_coding	ENSG00000019549	SNAI2	27.336	15.0529	25.1916	52.9134	38.906	37.4086	30.1054	23.5865	22.8278	27.931	11.5588	29.1122	12.8898	22.5914	20.6582
ENSG00000019582	0.123903	0.0105724	0.0419945	0.300687	0.763653		coding	protein_coding	ENSG00000019582	CD74	0	0	0	0	0.694751	0	0	0	0	1.16379	0	0	0	0	0
ENSG00000019991	0.14497	0	0.0419945	0	1		coding	protein_coding	ENSG00000019991	HGF	0	0	0	0	0	0	0	0	0	0	0	0	0	0	2.17455
ENSG00000019995	165.354	0.00130726	0.188612	0.00327826	0.997384	0.999261	coding	protein_coding	ENSG00000019995	ZRANB1	170.634	136.552	146.111	142.636	123.666	191.444	224.787	117.025	221.254	173.405	231.177	208.923	112.785	141.823	138.084
ENSG00000020129	50.9503	-0.153038	0.221543	-0.692556	0.488588	0.775302	coding	protein_coding	ENSG00000020129	NCDN	44.0253	46.2341	73.5596	62.1158	44.464	29.7068	47.4996	58.0591	84.2873	43.0603	69.353	33.3934	34.6412	35.1421	58.7127
ENSG00000020181	18.932	0.0141045	0.223955	0.0756188	0.939722	0.986577	coding	protein_coding	ENSG00000020181	GPR124	24.4585	17.2034	16.1226	18.4047	15.9793	27.5063	18.0632	21.7722	22.8278	18.6207	17.3382	12.8436	22.5571	15.0609	15.2218
ENSG00000020219	0						pseudo	pseudogene	ENSG00000020219	CCT8L1P	0	0	0	0	0	0	0	0	0	0	0	0	0	0	0
ENSG00000020256	125.145	-0.241254	0.167437	-1.44047	0.149734	0.436545	coding	protein_coding	ENSG00000020256	ZFP64	136.104	151.605	126.966	110.428	109.076	119.928	102.358	150.591	136.967	145.474	83.8015	114.736	109.563	139.313	140.258
ENSG00000020426	118.478	0.156234	0.161336	0.968923	0.332583	0.653986	coding	protein_coding	ENSG00000020426	MNAT1	112.797	103.22	115.881	116.18	112.55	150.735	100.351	147.869	154.527	126.853	121.368	125.011	103.118	95.3857	91.3309
ENSG00000020577	338.417	1.76119	0.144538	12.1441	6.16721e-34	3.13052e-31	coding	protein_coding	ENSG00000020577	SAMD4A	146.751	158.056	165.257	521.082	664.876	671.154	278.977	289.389	398.609	452.715	369.883	331.366	211.875	218.383	197.884
ENSG00000020633	32.895	-0.0619701	0.224358	-0.265159	0.790887	0.934248	coding	protein_coding	ENSG00000020633	RUNX3	23.883	58.0614	35.2683	40.2602	29.1795	37.4086	22.7463	39.9157	24.5838	27.931	23.1177	28.256	21.7515	45.1827	35.88
ENSG00000020922	137.632	-0.362312	0.18145	-1.9973	0.0457921	0.215586	coding	protein_coding	ENSG00000020922	MRE11A	165.742	180.635	127.973	98.9251	114.634	133.131	158.555	143.334	129.943	108.233	135.816	171.248	149.038	92.8756	154.393
ENSG00000021300	3.04344	-0.0329101	0.153174	-0.25659	0.797495		coding	protein_coding	ENSG00000021300	PLEKHB1	2.87747	1.07521	4.03066	1.15029	2.08425	3.30076	0.669009	6.35022	3.51197	1.16379	5.77942	0	1.61122	8.78553	3.26182
ENSG00000021355	305.265	0.0964856	0.132055	0.73135	0.464566	0.75739	coding	protein_coding	ENSG00000021355	SERPINB1	330.909	310.736	251.916	372.695	301.522	295.968	324.469	263.08	305.542	293.276	364.103	307.391	259.406	308.748	289.215
ENSG00000021461	0.120957	0	0.0419945	0	1		coding	protein_coding	ENSG00000021461	CYP3A43	0	0	0	0	0	0	0	1.81435	0	0	0	0	0	0	0
ENSG00000021488	1.53019	-0.126475	0.13219	-1.69566	0.0899503		coding	protein_coding	ENSG00000021488	SLC7A9	0.287747	2.15042	2.01533	0	0	0	0.669009	0.907174	1.75599	1.16379	2.88971	2.56873	4.02805	1.25508	3.26182
ENSG00000021574	120.94	-0.324369	0.152419	-2.12002	0.0340042	0.177034	coding	protein_coding	ENSG00000021574	SPAST	143.874	133.326	153.165	100.075	107.686	125.429	129.788	138.798	105.359	104.741	92.4706	134.43	118.425	100.406	126.124
ENSG00000021645	52.1348	-0.314785	0.205588	-1.54497	0.122353	0.389911	coding	protein_coding	ENSG00000021645	NRXN3	56.9739	52.6853	60.4599	42.5608	34.7375	48.4111	86.9711	43.5444	63.2155	44.2241	60.6839	43.6684	58.8095	42.6726	42.4036
ENSG00000021762	59.4815	0.418562	0.215555	1.95433	0.0506626	0.230565	coding	protein_coding	ENSG00000021762	OSBPL5	54.6719	29.0307	36.2759	70.1678	65.3066	58.3134	62.8868	60.7807	33.3637	50.0431	63.5736	103.605	58.8095	79.0697	66.3236
ENSG00000021776	692.138	-0.282981	0.14693	-1.92578	0.0541318	0.239753	coding	protein_coding	ENSG00000021776	AQR	680.81	837.589	807.14	582.048	640.56	633.745	595.418	613.25	944.721	583.06	592.39	721.812	760.496	776.892	612.135
ENSG00000021826	183.527	0.032743	0.189668	0.173824	0.862004	0.959593	coding	protein_coding	ENSG00000021826	CPS1	152.506	231.17	189.441	262.267	171.603	154.035	147.851	191.414	163.307	239.741	242.735	159.261	184.485	121.742	141.345
ENSG00000021852	0						coding	protein_coding	ENSG00000021852	C8B	0	0	0	0	0	0	0	0	0	0	0	0	0	0	0
ENSG00000022267	69.224	0.3966	0.171884	2.30776	0.0210127	0.127629	coding	protein_coding	ENSG00000022267	FHL1	60.7146	65.5879	57.4369	95.4742	90.3176	69.3159	66.9009	68.9452	64.9715	80.3017	57.7942	53.9433	73.3105	70.2842	63.0618
ENSG00000022277	256.6	0.0741934	0.13554	0.547782	0.583841	0.836759	coding	protein_coding	ENSG00000022277	RTFDC1	282.855	218.268	256.955	242.712	295.269	268.462	248.871	322.047	254.618	246.724	196.5	262.866	266.657	237.209	248.985
ENSG00000022355	0						coding	protein_coding	ENSG00000022355	GABRA1	0	0	0	0	0	0	0	0	0	0	0	0	0	0	0
ENSG00000022556	188.674	-0.705609	0.169358	-4.14692	3.36974e-05	0.000744855	coding	protein_coding	ENSG00000022556	NLRP2	256.67	270.953	254.939	132.284	171.603	128.73	242.85	166.013	252.862	131.509	144.485	121.586	135.343	215.873	204.407
ENSG00000022567	67.704	-0.750684	0.193908	-3.83573	0.000125191	0.00228413	coding	protein_coding	ENSG00000022567	SLC45A4	90.3526	101.07	104.797	59.8152	46.5483	42.9099	48.1686	60.7807	49.1676	58.1896	40.4559	83.9117	91.0339	58.9885	79.3709
ENSG00000022840	572.728	0.0536041	0.116562	0.459973	0.645536	0.869997	coding	protein_coding	ENSG00000022840	RNF10	601.391	576.313	495.771	592.4	537.042	620.542	622.178	648.629	739.27	530.689	575.052	412.709	517.202	574.824	546.898
ENSG00000022976	65.6786	-0.221248	0.226305	-0.969942	0.332075	0.653685	coding	protein_coding	ENSG00000022976	ZNF839	64.1676	45.1588	124.95	31.0579	90.3176	49.5114	86.9711	39.9157	47.4116	79.1379	75.1324	40.2434	57.1983	70.2842	83.72
ENSG00000023041	113.162	-0.0445391	0.190767	-0.231346	0.817046	0.944193	coding	protein_coding	ENSG00000023041	ZDHHC6	124.594	108.596	122.935	157.59	108.381	78.1179	106.372	94.3461	122.919	108.233	80.9118	118.161	151.455	94.1306	120.687
ENSG00000023171	853.73	0.31304	0.078308	3.9973	6.407e-05	0.00129167	coding	protein_coding	ENSG00000023171	GRAMD1B	812.598	698.887	772.879	925.985	1025.45	914.31	921.894	875.423	883.261	792.543	858.243	768.906	879.726	848.431	827.415
ENSG00000023191	398.196	0.252855	0.134072	1.88626	0.0592605	0.252934	coding	protein_coding	ENSG00000023191	RNH1	333.211	402.129	359.736	402.602	459.23	461.006	345.877	388.271	532.064	344.483	369.883	394.728	384.276	362.717	432.735
ENSG00000023228	444.704	-0.0204743	0.142444	-0.142224	0.886903	0.967405	coding	protein_coding	ENSG00000023228	NDUFS1	465.575	517.176	446.396	472.77	529.4	400.492	385.349	400.971	391.585	346.81	332.316	432.402	407.639	504.54	637.142
ENSG00000023287	206.542	0.502161	0.20484	2.4551	0.0140844	0.0960561	coding	protein_coding	ENSG00000023287	RB1CC1	120.278	231.17	126.966	251.914	175.077	349.88	181.97	176.899	223.01	289.784	222.507	246.598	207.847	175.711	118.513
ENSG00000023318	236.855	0.175077	0.13045	1.34285	0.17932	0.480518	coding	protein_coding	ENSG00000023318	ERP44	223.579	245.148	208.587	231.209	257.752	283.865	253.554	252.194	205.45	264.181	257.184	210.636	190.93	243.485	225.065
ENSG00000023330	187.775	0.0576813	0.130281	0.443668	0.657283	0.87611	coding	protein_coding	ENSG00000023330	ALAS1	188.762	162.357	204.556	175.995	211.899	191.444	168.59	187.785	208.962	171.077	219.618	177.242	194.152	176.966	177.225
ENSG00000023445	559.639	2.17046	0.169836	12.782	2.06685e-37	1.224e-34	coding	protein_coding	ENSG00000023445	BIRC3	167.757	180.635	170.295	1212.41	942.777	1048.54	592.742	460.844	477.628	863.534	592.39	732.087	441.474	279.882	231.589
ENSG00000023516	292.911	-0.0948177	0.133623	-0.708655	0.478539	0.767632	coding	protein_coding	ENSG00000023516	AKAP11	284.87	318.262	326.483	263.417	280.679	316.873	278.308	202.3	287.982	329.353	309.199	319.378	304.521	326.32	245.724
ENSG00000023572	67.8198	0.292041	0.202534	1.44094	0.149601	0.436259	coding	protein_coding	ENSG00000023572	GLRX2	64.4553	49.4597	47.3603	48.3123	75.7278	92.4212	64.8938	77.1098	66.7275	74.4827	104.029	61.6494	66.8656	47.6929	76.1091
ENSG00000023608	103.066	-0.1997	0.164438	-1.21299	0.225134	0.544076	coding	protein_coding	ENSG00000023608	SNAPC1	105.891	103.22	126.966	75.9193	97.2651	110.025	90.9852	94.3461	107.115	84.9568	115.588	104.462	95.8676	102.916	130.473
ENSG00000023697	147.731	-0.119306	0.178116	-0.668272	0.50396	0.785481	coding	protein_coding	ENSG00000023697	DERA	122.293	191.388	172.311	157.59	114.634	163.938	121.76	122.468	154.527	129.181	127.147	186.661	141.787	165.67	144.607
ENSG00000023734	752.203	0.0999164	0.0868195	1.15179	0.249408	0.569178	coding	protein_coding	ENSG00000023734	STRAP	756.487	797.806	721.488	866.17	846.901	729.467	742.6	737.533	704.151	694.784	612.618	750.068	738.744	773.126	811.105
ENSG00000023839	1081.55	-0.261198	0.0981412	-2.65994	0.00781545	0.0631846	coding	protein_coding	ENSG00000023839	ABCC2	1314.43	1153.7	1243.46	1029.51	1029.62	1014.43	1082.46	1061.39	830.582	1211.51	979.611	1055.75	1030.38	1080.62	1105.76
ENSG00000023892	0.334687	0	0.042059	0	1		coding	protein_coding	ENSG00000023892	DEF6	0	0	0	0	0	0	0	0	0	0	0	0	0	5.0203	0
ENSG00000023902	22.1317	-0.402378	0.2262	-1.8004	0.0717972	0.284687	coding	protein_coding	ENSG00000023902	PLEKHO1	25.8972	13.9777	42.3219	13.8035	12.5055	20.9048	26.7603	16.3291	26.3398	15.1293	14.4485	18.8373	26.5851	20.0812	38.0545
ENSG00000023909	469.27	0.0939234	0.102097	0.919413	0.357879	0.676312	coding	protein_coding	ENSG00000023909	GCLM	431.908	448.363	460.503	406.053	542.6	476.409	456.264	479.895	456.556	477.155	511.478	526.589	489.005	430.491	445.782
ENSG00000024048	235.798	0.20847	0.110631	1.88732	0.0591171	0.252397	coding	protein_coding	ENSG00000024048	UBR2	246.599	227.945	223.702	273.77	296.659	246.457	246.195	231.329	237.058	215.302	216.728	232.898	225.571	189.516	227.24
ENSG00000024422	725.847	0.327896	0.0855513	3.83349	0.000126339	0.0023007	coding	protein_coding	ENSG00000024422	EHD2	678.22	660.179	685.212	886.875	804.521	876.901	665.664	661.33	770.878	719.224	644.405	774.043	670.268	653.894	736.084
ENSG00000024526	169.887	-0.0339356	0.179933	-0.185436	0.852887	0.956001	coding	protein_coding	ENSG00000024526	DEPDC1	195.956	191.388	162.234	208.203	167.435	160.637	192.674	123.376	131.699	211.81	121.368	164.399	211.875	144.334	160.916
ENSG00000024862	17.8144	-0.146403	0.223935	-0.689737	0.49036	0.776665	coding	protein_coding	ENSG00000024862	CCDC28A	19.2791	15.0529	17.1303	11.5029	12.5055	19.8045	21.4083	14.5148	12.2919	23.2758	26.0074	20.5498	16.9178	16.316	20.6582
ENSG00000025039	17.2532	0.210633	0.225051	0.939964	0.347236	0.667723	coding	protein_coding	ENSG00000025039	RRAGD	13.5241	18.2786	13.0996	24.1561	17.3688	16.5038	19.4013	10.8861	14.0479	15.1293	23.1177	19.6936	22.5571	12.5508	18.4836
ENSG00000025156	35.9168	-0.1951	0.21085	-0.915887	0.359726	0.677929	coding	protein_coding	ENSG00000025156	HSF2	37.1194	43.0084	44.3373	36.8093	27.0953	38.5088	34.7885	49.8946	22.8278	20.9483	34.6765	30.8247	40.2805	43.9276	33.7055
ENSG00000025293	261.762	0.232689	0.166749	1.39499	0.16302	0.458178	coding	protein_coding	ENSG00000025293	PHF20	234.226	211.817	297.261	305.978	290.406	303.67	203.379	264.895	300.274	250.215	257.184	202.073	197.374	332.595	275.08
ENSG00000025423	13.097	-0.0965749	0.223787	-0.355428	0.722269	0.905072	coding	protein_coding	ENSG00000025423	HSD17B6	25.8972	15.0529	10.0767	14.9538	12.5055	19.8045	7.3591	12.7004	12.2919	16.2931	11.5588	11.1311	13.6954	8.78553	4.34909
ENSG00000025434	21.8182	-0.0033749	0.22223	-0.0400224	0.968075	0.99352	coding	protein_coding	ENSG00000025434	NR1H3	25.3217	8.60169	17.1303	21.8555	25.011	4.40101	21.4083	39.9157	15.8039	30.2586	23.1177	21.4061	19.3346	27.6117	26.0945
ENSG00000025708	15.0023	0.21545	0.225151	0.935629	0.349464	0.669058	coding	protein_coding	ENSG00000025708	TYMP	18.7036	7.52647	16.1226	23.0058	22.9268	14.3033	21.4083	10.8861	12.2919	10.4741	8.66912	12.8436	20.9459	7.53045	17.3964
ENSG00000025770	74.5683	0.13698	0.209271	0.652998	0.513758	0.792687	coding	protein_coding	ENSG00000025770	NCAPH2	65.3186	91.3929	83.6362	78.2199	77.8121	117.727	94.3302	83.46	40.3877	64.0086	69.353	58.2245	63.6432	85.3451	45.6655
ENSG00000025772	168.791	0.311172	0.134128	2.32146	0.020262	0.124399	coding	protein_coding	ENSG00000025772	TOMM34	165.167	130.1	172.311	202.451	193.141	203.547	165.245	154.22	133.455	147.802	193.61	160.974	170.789	185.751	153.305
ENSG00000025796	346.696	-0.303809	0.143576	-2.11562	0.034377	0.178452	coding	protein_coding	ENSG00000025796	SEC63	370.33	459.115	344.621	331.284	316.806	275.063	321.793	293.017	361.733	385.215	239.846	375.89	361.719	355.186	408.815
ENSG00000025800	528.184	-0.235126	0.0926514	-2.53687	0.011185	0.0818177	coding	protein_coding	ENSG00000025800	KPNA6	561.107	576.313	608.63	565.944	450.198	458.805	495.735	539.769	502.212	507.413	525.927	514.602	542.981	561.019	512.105
ENSG00000026025	5315.25	0.21796	0.0635901	3.42763	0.000608882	0.00856835	coding	protein_coding	ENSG00000026025	VIM	4942.34	5031.99	5089.72	5691.65	6005.42	5869.85	4787.43	5152.75	5692.91	5259.18	5643.6	5211.95	4959.34	5062.97	5327.64
ENSG00000026036	32.7254	0.282994	0.211076	1.23662	0.216229	0.532351	coding	protein_coding	ENSG00000026036	RTEL1-TNFRSF6B	42.8743	31.1811	13.0996	39.1099	28.4848	88.0202	59.5418	19.9578	35.1197	22.1121	14.4485	26.5435	8.0561	51.4581	10.8727
ENSG00000026103	80.9702	0.204623	0.169919	1.20594	0.227842	0.546366	coding	protein_coding	ENSG00000026103	FAS	84.0221	86.0169	62.4752	81.6707	98.6546	96.8222	80.95	71.6668	59.7035	100.086	72.2427	74.4931	87.8115	75.3045	82.6327
ENSG00000026297	34.9143	-0.0679901	0.223116	-0.311187	0.755658	0.91985	coding	protein_coding	ENSG00000026297	RNASET2	34.2419	31.1811	37.2836	31.0579	47.243	14.3033	38.8025	25.4009	47.4116	31.4224	34.6765	35.1059	35.4468	30.1218	50.0145
ENSG00000026508	3283.27	0.811114	0.100791	8.04523	8.60836e-16	1.3016e-13	coding	protein_coding	ENSG00000026508	CD44	2924.95	2420.3	2330.73	4380.31	4887.57	4643.07	3056.03	3425.49	3083.51	3334.27	3496.55	3136.42	3079.04	2394.68	2656.21
ENSG00000026559	36.7932	0.303187	0.22244	1.35375	0.175815	0.475344	coding	protein_coding	ENSG00000026559	KCNG1	31.3644	25.8051	41.3143	51.7631	45.1588	42.9099	54.1897	44.4515	29.8518	31.4224	40.4559	35.9622	42.6973	22.5914	11.96
ENSG00000026652	29.4571	-0.592943	0.22621	-2.74318	0.00608475	0.0527977	coding	protein_coding	ENSG00000026652	AGPAT4	27.6237	60.2118	25.1916	20.7053	11.116	15.4035	44.1546	18.1435	26.3398	39.5689	26.0074	27.3998	29.8076	28.8667	41.3164
ENSG00000026751	10.6993	0.156666	0.215789	0.707375	0.479333	0.767702	coding	protein_coding	ENSG00000026751	SLAMF7	16.4016	9.6769	5.03833	25.3064	7.64226	12.1028	14.0492	9.07174	7.02395	4.65517	11.5588	8.56242	12.0842	7.53045	9.78545
ENSG00000026950	14.2878	0.199751	0.225517	0.867439	0.385702	0.699143	coding	protein_coding	ENSG00000026950	BTN3A1	16.1138	5.37605	20.1533	20.7053	23.6215	12.1028	14.0492	18.1435	8.77993	8.14655	11.5588	12.8436	13.6954	13.8058	15.2218
ENSG00000027001	107.701	-0.275335	0.154471	-1.78725	0.0738977	0.289261	coding	protein_coding	ENSG00000027001	MIPEP	118.84	113.972	111.851	78.2199	102.128	94.6217	140.492	117.025	117.651	107.069	83.8015	109.599	112.785	87.8553	119.6
ENSG00000027075	88.4104	-0.169578	0.210963	-0.787796	0.430816	0.733843	coding	protein_coding	ENSG00000027075	PRKCH	116.825	129.025	77.5902	100.075	84.0648	90.2207	75.598	110.675	49.1676	55.862	40.4559	99.3241	105.535	100.406	91.3309
ENSG00000027644	0.0671777	-0.00547692	0.0419576	-0.164204	0.86957		coding	protein_coding	ENSG00000027644	INSRR	0	0	1.00767	0	0	0	0	0	0	0	0	0	0	0	0
ENSG00000027697	174.242	-0.329094	0.158783	-2.0735	0.0381255	0.191071	coding	protein_coding	ENSG00000027697	IFNGR1	215.81	170.959	192.464	146.087	143.813	157.336	157.886	180.528	170.331	192.026	124.257	172.961	177.234	251.015	160.916
ENSG00000027847	52.6186	-0.100758	0.206614	-0.473248	0.636036	0.864987	coding	protein_coding	ENSG00000027847	B4GALT7	72.2245	48.3845	53.4062	57.5146	52.1063	51.7119	53.5207	46.2659	98.3352	50.0431	37.5662	37.6747	45.1142	45.1827	40.2291
ENSG00000027869	6.64394	0.157199	0.187308	0.788599	0.430347	0.733571	coding	protein_coding	ENSG00000027869	SH2D2A	7.76917	4.30084	6.04599	10.3526	4.1685	15.4035	4.01405	2.72152	8.77993	4.65517	0	11.1311	2.41683	3.76523	14.1345
ENSG00000028116	153.489	-0.528872	0.185984	-2.85327	0.00432721	0.0409472	coding	protein_coding	ENSG00000028116	VRK2	174.087	216.117	157.196	115.029	97.9598	129.83	189.998	113.397	115.895	133.836	121.368	200.361	175.623	192.026	169.615
ENSG00000028137	1.17943	0.0569556	0.0944858	0.609432	0.542238		coding	protein_coding	ENSG00000028137	TNFRSF1B	1.72648	0	0	3.45088	0.694751	1.10025	0.669009	1.81435	0	5.81896	0	0	2.41683	0	0
ENSG00000028203	499.146	0.29378	0.0895918	3.27916	0.00104115	0.0133195	coding	protein_coding	ENSG00000028203	VEZT	397.379	472.017	437.327	556.741	507.863	540.224	451.581	459.03	493.432	553.965	603.949	623.344	470.476	471.908	447.956
ENSG00000028277	6.06271	-0.054894	0.143842	-0.261768	0.793501	0.935082	coding	protein_coding	ENSG00000028277	POU2F2	6.90593	1.07521	25.1916	2.30058	13.895	9.90227	16.0562	1.81435	1.75599	0	8.66912	2.56873	0.80561	0	0
ENSG00000028310	165.31	0.120454	0.174196	0.691436	0.489292	0.77589	coding	protein_coding	ENSG00000028310	BRD9	174.375	146.229	153.165	136.885	191.056	198.045	171.935	169.642	142.235	228.103	213.838	136.999	111.98	151.864	153.305
ENSG00000028528	383.809	-0.103157	0.0877527	-1.17759	0.238961	0.55907	coding	protein_coding	ENSG00000028528	SNX1	379.538	381.7	398.028	345.088	364.049	363.083	368.624	390.992	368.757	444.569	416.118	387.022	361.719	395.349	392.505
ENSG00000028839	49.8514	-0.088322	0.22628	-0.373558	0.708733	0.899231	coding	protein_coding	ENSG00000028839	TBPL1	58.1249	76.34	46.3526	59.8152	69.4751	30.8071	34.1194	55.3376	28.0958	32.5862	57.7942	47.9496	81.3666	48.9479	20.6582
ENSG00000029153	406.05	0.525917	0.132288	3.97379	7.07366e-05	0.00140025	coding	protein_coding	ENSG00000029153	ARNTL2	369.18	288.156	318.422	462.417	556.495	446.703	406.088	396.435	282.714	441.077	453.684	458.946	430.196	362.717	417.513
ENSG00000029363	746.369	-0.524099	0.156706	-3.34569	0.000820775	0.0110054	coding	protein_coding	ENSG00000029363	BCLAF1	799.937	907.478	982.473	608.505	614.854	536.923	848.972	585.127	656.739	1007.84	736.875	692.7	848.307	804.503	564.295
ENSG00000029364	473.191	-0.290076	0.0847794	-3.4184	0.000629904	0.00883793	coding	protein_coding	ENSG00000029364	SLC39A9	557.654	521.477	536.078	442.862	446.03	425.798	465.63	489.874	395.097	465.517	424.787	458.946	488.2	481.949	497.971
ENSG00000029534	44.6787	-0.333731	0.225928	-1.4697	0.141644	0.423473	coding	protein_coding	ENSG00000029534	ANK1	45.7518	73.1143	47.3603	34.5088	36.8218	35.2081	38.8025	33.5654	36.8757	26.7672	26.0074	35.1059	40.2805	33.887	126.124
ENSG00000029559	0						coding	protein_coding	ENSG00000029559	IBSP	0	0	0	0	0	0	0	0	0	0	0	0	0	0	0
ENSG00000029639	30.6541	-0.294657	0.220637	-1.32528	0.185079	0.488697	coding	protein_coding	ENSG00000029639	TFB1M	24.7462	39.7828	51.3909	28.7573	33.348	17.604	27.4294	33.5654	21.0718	29.0948	26.0074	32.5372	36.2525	28.8667	29.3564
ENSG00000029725	339.296	-0.0304741	0.153371	-0.198228	0.842866	0.952476	coding	protein_coding	ENSG00000029725	RABEP1	334.074	289.232	419.189	389.949	262.616	368.585	375.314	267.616	331.881	353.793	401.669	350.203	332.717	312.514	300.087
ENSG00000029993	709.382	-0.506991	0.117201	-4.32556	1.52142e-05	0.000372827	coding	protein_coding	ENSG00000029993	HMGB3	778.068	815.01	940.152	628.059	552.327	552.327	743.938	656.794	518.016	668.017	670.412	688.419	724.244	854.706	850.247
ENSG00000030066	258.676	-0.398345	0.150536	-2.64842	0.00808693	0.0645531	coding	protein_coding	ENSG00000030066	NUP160	321.989	260.201	283.154	203.602	218.152	211.248	234.822	294.832	300.274	283.965	156.044	261.154	256.184	291.177	303.349
ENSG00000030110	40.4715	-0.020111	0.199488	-0.0963911	0.92321	0.979696	coding	protein_coding	ENSG00000030110	BAK1	37.6949	49.4597	41.3143	37.9596	43.7693	41.8096	37.4645	42.6372	54.4356	34.9138	14.4485	34.2497	44.3086	50.203	42.4036
ENSG00000030304	0						coding	protein_coding	ENSG00000030304	MUSK	0	0	0	0	0	0	0	0	0	0	0	0	0	0	0
ENSG00000030419	10.1293	-0.256659	0.198758	-1.17787	0.238847	0.558896	coding	protein_coding	ENSG00000030419	IKZF2	7.48142	25.8051	17.1303	5.75146	7.64226	13.203	14.7182	3.6287	7.02395	4.65517	5.77942	23.1185	8.0561	2.51015	5.43636
ENSG00000030582	356.693	0.425943	0.164378	2.59017	0.00959284	0.0733027	coding	protein_coding	ENSG00000030582	GRN	294.941	280.63	335.552	542.938	419.629	330.076	312.427	298.46	430.217	322.37	453.684	303.11	365.747	330.085	330.531
ENSG00000031003	166.315	-0.43503	0.167248	-2.60047	0.00930973	0.0719117	coding	protein_coding	ENSG00000031003	FAM13B	175.238	198.914	212.617	119.63	163.266	121.028	135.809	171.456	163.307	253.707	141.596	182.38	138.565	160.65	156.567
ENSG00000031081	74.8309	0.240596	0.223949	1.09201	0.27483	0.595044	coding	protein_coding	ENSG00000031081	ARHGAP31	55.2474	56.9862	56.4292	81.6707	77.8121	91.321	60.8798	265.802	26.3398	72.1551	83.8015	64.2182	44.3086	37.6523	47.84
ENSG00000031544	5.44899	-0.0868001	0.187884	-0.511879	0.608735	0.852177	other	processed_transcript	ENSG00000031544	NR2E3	4.02846	8.60169	4.03066	5.75146	4.86325	1.10025	4.68306	6.35022	0	4.65517	5.77942	5.13745	4.83366	17.5711	4.34909
ENSG00000031691	30.0237	-0.393711	0.218949	-1.78517	0.074233	0.289887	coding	protein_coding	ENSG00000031691	CENPQ	39.1336	35.482	39.2989	20.7053	18.0635	36.3083	39.4715	27.2152	22.8278	26.7672	26.0074	34.2497	37.0581	23.8464	23.92
ENSG00000031698	229.319	0.15321	0.12458	1.23099	0.218327	0.535414	coding	protein_coding	ENSG00000031698	SARS	211.494	230.095	227.732	254.215	254.279	238.755	214.083	261.266	203.694	217.629	193.61	214.917	230.404	207.087	280.516
ENSG00000031823	219.07	-0.282407	0.168164	-1.67905	0.0931425	0.332521	coding	protein_coding	ENSG00000031823	RANBP3	225.018	234.396	273.077	170.243	211.204	194.745	222.78	256.73	165.063	173.405	248.515	162.686	198.18	251.015	299
ENSG00000032219	69.6823	-0.0781897	0.226204	-0.356396	0.721544	0.904838	coding	protein_coding	ENSG00000032219	ARID4A	52.37	60.2118	92.7052	33.3585	34.0428	115.527	94.3302	76.2026	70.2395	76.8103	43.3456	58.2245	129.703	52.7132	55.4509
ENSG00000032389	75.9469	-0.187572	0.177012	-1.05562	0.291141	0.613398	coding	protein_coding	ENSG00000032389	TSSC1	85.1731	62.3622	104.797	80.5204	68.7803	67.1154	82.9571	76.2026	71.9954	75.6465	60.6839	79.6305	85.3947	64.0088	73.9345
ENSG00000032444	202.278	-0.148493	0.153856	-0.972282	0.33091	0.65241	coding	protein_coding	ENSG00000032444	PNPLA6	203.725	190.312	180.372	167.943	217.457	121.028	258.906	257.637	230.034	172.241	176.272	175.53	215.098	212.108	255.509
ENSG00000032742	75.5387	-0.23686	0.210583	-1.12624	0.260064	0.580538	coding	protein_coding	ENSG00000032742	IFT88	87.4751	75.2647	89.6822	69.0175	45.8535	85.8197	81.6191	80.7385	54.4356	61.681	75.1324	77.918	48.3366	114.212	85.8945
ENSG00000033011	98.8237	0.022742	0.159287	0.146139	0.883812	0.966501	coding	protein_coding	ENSG00000033011	ALG1	108.193	104.295	87.6669	103.526	111.16	92.4212	82.9571	82.5528	105.359	100.086	98.2501	90.7617	87.0059	104.171	123.949
ENSG00000033030	139.07	-0.21749	0.144846	-1.50113	0.133323	0.408564	coding	protein_coding	ENSG00000033030	ZCCHC8	149.628	147.304	154.173	136.885	111.855	134.231	113.731	124.283	115.895	162.931	147.375	127.58	167.567	122.997	169.615
ENSG00000033050	374.867	-0.148291	0.159311	-0.929796	0.352476	0.671598	coding	protein_coding	ENSG00000033050	ABCF2	345.009	453.739	424.227	334.735	428.661	313.572	319.117	506.203	312.566	300.258	317.868	291.979	465.643	394.094	415.338
ENSG00000033100	173.154	-0.0286266	0.145822	-0.193932	0.846229	0.95403	coding	protein_coding	ENSG00000033100	CHPF2	185.597	169.883	188.433	219.706	166.74	148.534	169.928	175.992	179.111	171.077	115.588	178.955	163.539	187.006	177.225
ENSG00000033122	0.0383663	-0.00842356	0.0419715	-0.164936	0.868994		coding	protein_coding	ENSG00000033122	LRRC7	0.575494	0	0	0	0	0	0	0	0	0	0	0	0	0	0
ENSG00000033170	144.442	0.430186	0.178373	2.41161	0.0158821	0.104554	coding	protein_coding	ENSG00000033170	FUT8	119.703	144.078	100.767	179.446	140.34	209.048	194.682	123.376	156.283	122.198	150.265	124.155	137.759	156.884	107.64
ENSG00000033178	273.434	0.0292229	0.209151	0.139003	0.889448	0.967405	coding	protein_coding	ENSG00000033178	UBA6	271.633	296.758	438.334	399.151	365.439	269.562	217.428	351.984	135.211	307.241	320.758	187.517	157.094	224.658	158.742
ENSG00000033327	36.7858	0.647478	0.220678	3.02685	0.00247113	0.0264077	coding	protein_coding	ENSG00000033327	GAB2	20.43	12.9025	18.138	26.4567	33.348	114.426	30.7744	21.7722	33.3637	26.7672	28.8971	74.4931	28.1964	58.9885	22.8327
ENSG00000033627	190.022	0.460468	0.177753	2.58798	0.00965403	0.073612	coding	protein_coding	ENSG00000033627	ATP6V0A1	153.945	173.109	151.15	251.914	249.415	205.747	214.083	213.186	135.211	203.664	254.294	160.974	134.537	212.108	136.996
ENSG00000033800	296.523	-0.31712	0.142679	-2.21854	0.0265183	0.150461	coding	protein_coding	ENSG00000033800	PIAS1	344.433	368.797	339.583	273.77	279.985	267.361	349.223	276.688	203.694	295.603	213.838	256.873	328.689	302.473	346.84
ENSG00000033867	501.882	0.226879	0.158382	1.4326	0.151972	0.440542	coding	protein_coding	ENSG00000033867	SLC4A7	444.281	465.566	435.311	471.62	679.466	459.906	454.257	435.444	451.288	741.336	511.478	434.971	556.677	532.152	454.48
ENSG00000034053	192.279	0.439712	0.132148	3.32581	0.000881614	0.0116568	coding	protein_coding	ENSG00000034053	APBA2	169.195	152.68	147.119	205.902	225.794	229.953	240.174	195.042	163.307	208.319	187.831	216.629	185.29	173.2	183.749
ENSG00000034063	476.785	-0.341813	0.101491	-3.36872	0.000755179	0.0102418	other	processed_transcript	ENSG00000034063	UHRF1	516.794	541.906	501.817	364.643	454.367	388.389	443.553	461.752	481.14	424.784	525.927	518.883	532.508	499.52	495.796
ENSG00000034152	135.213	0.800655	0.172746	4.63444	3.57904e-06	0.000105537	coding	protein_coding	ENSG00000034152	MAP2K3	79.4182	116.123	93.7129	216.255	186.888	156.236	121.76	131.54	163.307	139.655	130.037	126.724	109.563	100.406	156.567
ENSG00000034239	0.0716807	-0.00547692	0.0419576	-0.164204	0.86957		coding	protein_coding	ENSG00000034239	EFCAB1	0	1.07521	0	0	0	0	0	0	0	0	0	0	0	0	0
ENSG00000034510	3461.98	0.336027	0.0604155	5.56193	2.66813e-08	1.24335e-06	coding	protein_coding	ENSG00000034510	TMSB10	3003.22	3039.62	3013.93	4109.99	3674.54	3702.35	3554.44	3391.02	3148.48	3675.26	3872.21	3645.02	3473.79	3325.95	3299.87
ENSG00000034533	19.1549	0.351733	0.220576	1.50785	0.131592	0.405913	coding	protein_coding	ENSG00000034533	ASTE1	22.1565	7.52647	19.1456	25.3064	17.3688	48.4111	10.0351	11.7933	31.6078	11.6379	5.77942	10.2749	14.501	21.3363	30.4436
ENSG00000034677	268.029	-0.135836	0.178609	-0.756947	0.449081	0.746962	coding	protein_coding	ENSG00000034677	RNF19A	268.756	381.7	261.993	297.926	321.67	188.143	242.85	182.342	254.618	275.819	309.199	250.023	268.268	208.342	308.785
ENSG00000034693	21.1929	-0.23039	0.225493	-0.997719	0.318416	0.63975	coding	protein_coding	ENSG00000034693	PEX3	26.4727	26.8803	26.1993	28.7573	15.2845	16.5038	34.1194	19.0507	15.8039	18.6207	8.66912	18.8373	27.3907	20.0812	15.2218
ENSG00000034713	115.586	0.151455	0.154134	0.980947	0.326619	0.648085	coding	protein_coding	ENSG00000034713	GABARAPL2	113.66	120.424	83.6362	131.133	109.771	122.128	114.4	105.232	103.603	116.379	106.919	131.861	114.397	116.722	143.52
ENSG00000034971	0						coding	protein_coding	ENSG00000034971	MYOC	0	0	0	0	0	0	0	0	0	0	0	0	0	0	0
ENSG00000035115	26.4291	-0.318748	0.225038	-1.44093	0.149604	0.436259	coding	protein_coding	ENSG00000035115	SH3YL1	22.4443	46.2341	23.1763	14.9538	22.9268	20.9048	26.7603	24.4937	22.8278	30.2586	20.228	23.1185	20.1403	46.4378	31.5309
ENSG00000035141	261.787	-0.121609	0.138253	-0.877742	0.380084	0.69475	coding	protein_coding	ENSG00000035141	FAM136A	258.685	295.683	298.269	255.365	245.247	272.863	230.808	249.473	287.982	231.595	242.735	265.435	201.403	291.177	300.087
ENSG00000035403	1744.74	-0.345032	0.0895843	-3.84937	0.000118423	0.002169	coding	protein_coding	ENSG00000035403	VCL	2290.47	2068.71	2012.31	1661.02	1647.25	1665.78	1595.59	1625.66	1566.34	1720.09	1493.98	1635.42	1988.25	1523.66	1676.57
ENSG00000035499	100.954	-0.0971175	0.205877	-0.479809	0.631363	0.862974	coding	protein_coding	ENSG00000035499	DEPDC1B	92.0791	113.972	82.6285	94.324	100.044	66.0152	56.1967	123.376	143.991	102.414	118.478	125.868	99.09	90.3654	105.465
ENSG00000035664	26.5264	-0.137652	0.225285	-0.618667	0.536136	0.807042	coding	protein_coding	ENSG00000035664	DAPK2	29.9257	34.4067	18.138	11.5029	31.2638	25.3058	29.4364	27.2152	29.8518	32.5862	28.8971	20.5498	32.2244	15.0609	31.5309
ENSG00000035681	268.778	-0.130378	0.175965	-0.74135	0.458481	0.753515	coding	protein_coding	ENSG00000035681	NSMAF	239.118	318.262	298.269	239.261	231.352	292.667	321.124	233.144	233.546	212.974	234.066	357.909	261.018	228.424	330.531
ENSG00000035687	285.625	0.00241068	0.127656	0.0202401	0.983852	0.996295	coding	protein_coding	ENSG00000035687	ADSS	284.006	315.037	291.215	289.874	323.754	272.863	305.737	316.604	208.962	325.862	277.412	283.416	267.463	262.311	259.858
ENSG00000035720	0						coding	protein_coding	ENSG00000035720	STAP1	0	0	0	0	0	0	0	0	0	0	0	0	0	0	0
ENSG00000035862	854.985	-0.109977	0.0637401	-1.72464	0.0845917	0.31359	coding	protein_coding	ENSG00000035862	TIMP2	909.281	890.274	897.83	820.158	880.249	789.981	877.07	897.195	916.625	803.017	820.677	805.724	866.031	830.86	819.804
ENSG00000035928	244.604	-0.438217	0.19864	-2.22611	0.026007	0.148211	coding	protein_coding	ENSG00000035928	RFC1	321.126	277.404	199.518	259.966	110.465	161.737	237.498	176.899	215.986	289.784	251.405	218.342	273.907	389.073	285.953
ENSG00000036054	103.998	0.0442702	0.211916	0.210187	0.833522	0.950148	coding	protein_coding	ENSG00000036054	TBC1D23	134.09	115.048	84.6439	118.48	150.066	81.4187	135.809	78.9241	57.9475	93.1034	83.8015	92.4742	114.397	139.313	80.4582
ENSG00000036257	478.788	-0.284174	0.104326	-2.72215	0.00648583	0.0553652	coding	protein_coding	ENSG00000036257	CUL3	518.232	530.079	584.446	446.313	446.03	429.099	444.891	430.001	372.269	506.25	416.118	476.927	547.009	578.59	455.567
ENSG00000036448	7.05273	-0.043181	0.211315	-0.236522	0.813028	0.94286	coding	protein_coding	ENSG00000036448	MYOM2	6.61818	9.6769	3.023	8.05204	4.1685	5.50126	3.34504	6.35022	12.2919	5.81896	8.66912	6.84994	8.86171	10.0406	6.52364
ENSG00000036473	0						coding	protein_coding	ENSG00000036473	OTC	0	0	0	0	0	0	0	0	0	0	0	0	0	0	0
ENSG00000036530	6.38689	0.235533	0.20428	1.27514	0.202259	0.514718	coding	protein_coding	ENSG00000036530	CYP46A1	2.30198	6.45126	3.023	3.45088	8.33701	8.80202	5.35207	7.25739	3.51197	10.4741	2.88971	17.1248	4.02805	6.27538	6.52364
ENSG00000036549	178.793	-0.483298	0.193775	-2.51447	0.0119212	0.0854104	coding	protein_coding	ENSG00000036549	ZZZ3	173.224	158.056	265.016	101.226	118.802	160.637	213.414	174.177	159.795	226.94	118.478	136.143	209.459	228.424	238.113
ENSG00000036565	0.188746	-0.0060143	0.0419961	-0.164208	0.869567		coding	protein_coding	ENSG00000036565	SLC18A1	0	1.07521	0	0	0	0	0	0	1.75599	0	0	0	0	0	0
ENSG00000036672	5.67756	-0.292328	0.195634	-1.50628	0.131996	0.406601	coding	protein_coding	ENSG00000036672	USP2	6.61818	12.9025	5.03833	5.75146	3.47375	1.10025	4.01405	2.72152	8.77993	2.32758	0	5.13745	8.0561	13.8058	5.43636
ENSG00000036828	0						coding	protein_coding	ENSG00000036828	CASR	0	0	0	0	0	0	0	0	0	0	0	0	0	0	0
ENSG00000037042	58.5136	0.273792	0.212252	1.28524	0.19871	0.510072	coding	protein_coding	ENSG00000037042	TUBG2	47.766	68.8135	51.3909	67.8672	51.4115	102.323	46.8306	83.46	49.1676	50.0431	69.353	43.6684	53.1703	48.9479	43.4909
ENSG00000037241	169.334	0.0369181	0.129661	0.280962	0.77874	0.928057	coding	protein_coding	ENSG00000037241	RPL26L1	145.025	155.906	176.341	163.341	162.572	159.537	178.625	205.021	194.914	169.914	196.5	162.686	141.787	150.609	177.225
ENSG00000037280	12.2564	0.212748	0.181085	1.24461	0.213277	0.528839	coding	protein_coding	ENSG00000037280	FLT4	10.9344	4.30084	6.04599	5.75146	7.64226	35.2081	21.4083	21.7722	8.77993	2.32758	2.88971	20.5498	25.7795	5.0203	5.43636
ENSG00000037474	479.023	-0.197665	0.113842	-1.73612	0.0825427	0.30911	coding	protein_coding	ENSG00000037474	NSUN2	500.968	498.898	543.131	518.782	455.062	356.482	463.623	454.494	470.604	432.931	505.699	457.233	466.448	543.448	517.542
ENSG00000037637	97.0805	-0.156884	0.152359	-1.02708	0.304384	0.625988	coding	protein_coding	ENSG00000037637	FBXO42	98.6972	120.424	95.7282	93.1737	87.5386	95.722	87.6401	93.4389	96.5792	95.431	98.2501	77.0618	116.008	92.8756	107.64
ENSG00000037749	170.137	-0.339449	0.18796	-1.80181	0.0715746	0.284268	coding	protein_coding	ENSG00000037749	MFAP3	181.568	173.109	256.955	124.232	129.918	198.045	176.618	147.869	147.503	224.612	141.596	179.811	159.511	193.282	117.425
ENSG00000037757	49.0669	0.0985592	0.20475	0.483257	0.628913	0.862284	coding	protein_coding	ENSG00000037757	MRI1	50.9312	55.911	40.3066	62.1158	54.1906	46.2106	51.5137	47.1731	38.6317	47.7155	23.1177	64.2182	62.032	45.1827	46.7527
ENSG00000037897	98.2253	-0.461548	0.208625	-2.21167	0.0269892	0.152282	coding	protein_coding	ENSG00000037897	METTL1	153.369	101.07	101.774	79.3702	91.0123	55.0126	71.5839	117.933	112.383	60.5172	95.3604	124.155	116.008	107.936	85.8945
ENSG00000037965	13.8676	-0.531117	0.226033	-2.31796	0.0204517	0.125185	coding	protein_coding	ENSG00000037965	HOXC8	15.2506	18.2786	27.207	8.05204	9.03176	11.0025	14.0492	12.7004	8.77993	11.6379	8.66912	10.2749	18.529	22.5914	11.96
ENSG00000038002	45.4444	0.31715	0.201579	1.57057	0.116282	0.379323	coding	protein_coding	ENSG00000038002	AGA	48.3415	38.7076	32.2453	49.4626	51.4115	64.9149	49.5066	30.8439	50.9236	43.0603	46.2353	41.9559	46.7254	35.1421	52.1891
ENSG00000038210	130.322	0.063652	0.178509	0.357723	0.72055	0.904481	coding	protein_coding	ENSG00000038210	PI4K2B	109.919	154.83	124.95	133.434	106.297	170.539	92.9922	120.654	107.115	121.034	115.588	176.386	140.176	133.038	147.869
ENSG00000038219	255.926	-0.536559	0.223331	-2.46952	0.0135294	0.0932556	coding	protein_coding	ENSG00000038219	BOD1L1	135.529	708.564	250.909	138.035	91.7071	209.048	227.463	174.177	321.345	263.017	277.412	352.772	295.659	200.812	192.447
ENSG00000038274	171.716	-0.415239	0.16616	-2.50317	0.0123088	0.0873858	coding	protein_coding	ENSG00000038274	MAT2B	194.805	194.613	183.395	125.382	146.592	133.131	115.069	170.549	126.431	172.241	190.721	173.817	282.769	169.435	196.796
ENSG00000038295	36.3307	0.240486	0.221956	1.08151	0.279469	0.600428	coding	protein_coding	ENSG00000038295	TLL1	37.6949	34.4067	21.161	46.0117	38.906	40.7093	30.7744	51.7089	40.3877	53.5345	23.1177	39.3871	39.4749	31.3769	16.3091
ENSG00000038358	199.527	-0.199273	0.216149	-0.942795	0.345786	0.666491	coding	protein_coding	ENSG00000038358	EDC4	185.309	193.538	193.472	186.347	147.287	126.529	131.795	152.405	396.853	219.957	138.706	238.035	212.681	278.627	191.36
ENSG00000038382	1512.65	0.67499	0.140474	4.8059	1.54054e-06	5.03349e-05	coding	protein_coding	ENSG00000038382	TRIO	1197.03	1234.34	904.883	2062.47	1898.75	1681.19	1792.94	1415.19	1274.85	1988.92	2080.59	1534.39	1171.36	1349.21	1103.58
ENSG00000038427	3046.44	-0.489474	0.133818	-3.65568	0.000256501	0.00417123	coding	protein_coding	ENSG00000038427	VCAN	3457.57	4238.48	3819.05	2874.58	2352.43	2683.52	2936.28	2956.48	2356.53	3507.67	2560.28	3585.94	2922.75	3138.94	2306.11
ENSG00000038532	156.195	0.0727742	0.166398	0.442421	0.658185	0.876612	coding	protein_coding	ENSG00000038532	CLEC16A	174.95	213.967	132.004	211.654	170.214	172.74	143.168	127.004	140.479	123.362	127.147	161.83	166.761	116.722	160.916
ENSG00000038945	0.387407	-0.0228578	0.0421157	-0.416017	0.677398		coding	protein_coding	ENSG00000038945	MSR1	2.01423	0	0	0	0	0	0	0.907174	0	0	2.88971	0	0	0	0
ENSG00000039068	174.01	-0.218197	0.224591	-0.990306	0.322025	0.64374	coding	protein_coding	ENSG00000039068	CDH1	198.258	194.613	135.027	136.885	144.508	119.928	189.329	123.376	93.0673	146.638	525.927	142.992	163.539	173.2	122.862
ENSG00000039123	405.095	-0.370436	0.139265	-2.65755	0.00787106	0.0634191	coding	protein_coding	ENSG00000039123	SKIV2L2	469.028	511.8	449.419	372.695	372.386	326.775	429.504	401.878	400.365	300.258	445.015	423.84	480.144	338.87	354.451
ENSG00000039139	47.4874	0.16656	0.221673	0.814532	0.41534	0.723428	coding	protein_coding	ENSG00000039139	DNAH5	40.2846	6.45126	41.3143	46.0117	58.3591	17.604	52.1827	48.9874	45.6556	77.9741	54.9044	111.311	43.5029	51.4581	16.3091
ENSG00000039319	277.62	-0.0803428	0.174971	-0.46467	0.642168	0.868196	coding	protein_coding	ENSG00000039319	ZFYVE16	245.736	253.75	266.024	250.764	175.772	290.467	288.343	310.254	247.594	308.405	514.368	314.241	270.685	232.189	195.709
ENSG00000039523	198.066	0.505442	0.141816	3.56368	0.000365695	0.00564345	coding	protein_coding	ENSG00000039523	FAM65A	168.908	159.131	164.249	293.324	218.152	223.351	167.921	227.701	172.087	187.371	219.618	205.498	202.208	190.771	170.702
ENSG00000039537	0.0191831	-0.00303674	0.0419456	-0.0700174	0.94418		coding	protein_coding	ENSG00000039537	C6	0.287747	0	0	0	0	0	0	0	0	0	0	0	0	0	0
ENSG00000039560	793.656	-0.0423305	0.153699	-0.275231	0.783139	0.929926	coding	protein_coding	ENSG00000039560	RAI14	768.285	906.403	771.871	820.158	832.311	709.663	733.903	822.807	709.418	734.353	1100.98	620.776	919.201	650.129	804.582
ENSG00000039600	0.783924	0.0390962	0.0751421	0.464157	0.642535		coding	protein_coding	ENSG00000039600	SOX30	1.43874	0	0	0	0.694751	3.30076	2.00703	0	3.51197	0	0	0	0.80561	0	0
ENSG00000039650	108.556	0.152942	0.202071	0.758698	0.448033	0.745917	coding	protein_coding	ENSG00000039650	PNKP	81.7202	135.477	74.5672	79.3702	136.866	116.627	133.802	93.4389	112.383	117.543	83.8015	106.174	90.2283	121.742	144.607
ENSG00000039987	0						coding	protein_coding	ENSG00000039987	BEST2	0	0	0	0	0	0	0	0	0	0	0	0	0	0	0
ENSG00000040199	183.819	0.00406804	0.214487	0.0146139	0.98834	0.99711	coding	protein_coding	ENSG00000040199	PHLPP2	183.87	134.401	148.127	188.648	159.098	122.128	167.921	144.241	314.322	224.612	161.824	154.98	332.717	168.18	152.218
ENSG00000040275	723.356	-0.187736	0.0778907	-2.40952	0.0159737	0.104963	coding	protein_coding	ENSG00000040275	SPDL1	742.675	824.687	777.917	685.574	711.425	641.447	753.304	781.077	858.677	622.629	702.199	665.3	685.574	696.567	701.291
ENSG00000040341	212.361	-0.0542004	0.130421	-0.412863	0.679707	0.886219	coding	protein_coding	ENSG00000040341	STAU2	213.508	264.502	199.518	225.457	224.404	195.845	212.076	185.064	238.814	236.25	228.287	223.479	183.679	195.792	158.742
ENSG00000040487	43.566	0.474009	0.197239	2.40963	0.0159686	0.104963	coding	protein_coding	ENSG00000040487	PQLC2	30.7889	30.1059	41.3143	48.3123	43.0745	67.1154	50.8447	47.1731	40.3877	44.2241	37.5662	35.9622	47.531	40.1624	48.9273
ENSG00000040531	33.7004	0.0363962	0.22621	0.16274	0.870724	0.962332	coding	protein_coding	ENSG00000040531	CTNS	27.0482	34.4067	50.3833	50.6129	29.1795	37.4086	15.3872	14.5148	49.1676	15.1293	37.5662	33.3934	37.8637	28.8667	44.5782
ENSG00000040608	14.2296	0.078295	0.225988	0.340078	0.733798	0.909201	coding	protein_coding	ENSG00000040608	RTN4R	10.6466	6.45126	19.1456	11.5029	10.4213	18.7043	14.7182	12.7004	22.8278	11.6379	14.4485	14.5561	12.8898	17.5711	15.2218
ENSG00000040633	180.16	-0.26279	0.170247	-1.54246	0.122962	0.390641	coding	protein_coding	ENSG00000040633	PHF23	242.571	206.44	148.127	167.943	148.677	168.339	181.301	175.085	129.943	219.957	156.044	178.098	159.511	208.342	212.018
ENSG00000040731	0						coding	protein_coding	ENSG00000040731	CDH10	0	0	0	0	0	0	0	0	0	0	0	0	0	0	0
ENSG00000040933	117.291	-0.05053	0.191437	-0.263541	0.792134	0.934421	coding	protein_coding	ENSG00000040933	INPP4A	141.284	91.3929	126.966	162.191	103.518	82.5189	123.098	127.912	98.3352	144.31	95.3604	110.455	124.064	119.232	108.727
ENSG00000041353	255.939	0.00758643	0.205941	0.037434	0.970139	0.99398	coding	protein_coding	ENSG00000041353	RAB27B	218.976	366.647	216.648	263.417	214.678	328.976	198.027	194.135	365.245	263.017	231.177	217.486	355.274	202.067	203.32
ENSG00000041357	1235.81	-0.074061	0.0810254	-0.913461	0.361	0.678909	coding	protein_coding	ENSG00000041357	PSMA4	1356.44	1289.18	1246.48	1312.48	1144.95	1246.59	1269.78	1171.16	1072.91	1135.86	1329.27	1226.14	1220.5	1223.7	1291.68
ENSG00000041515	0.556959	0.0170039	0.0706432	0.214977	0.829785		coding	protein_coding	ENSG00000041515	MYO16	1.43874	0	0	0	1.3895	1.10025	2.00703	0	0	1.16379	0	0	0	1.25508	0
ENSG00000041802	178.175	0.0495002	0.146929	0.339995	0.73386	0.909201	coding	protein_coding	ENSG00000041802	LSG1	189.913	158.056	203.548	211.654	169.519	196.945	210.738	153.312	161.551	193.19	161.824	161.83	153.872	185.751	160.916
ENSG00000041880	53.3435	0.323614	0.214723	1.51646	0.129404	0.401928	coding	protein_coding	ENSG00000041880	PARP3	37.6949	38.7076	49.3756	80.5204	49.3273	47.3109	74.26	43.5444	66.7275	65.1724	75.1324	35.9622	41.8917	40.1624	54.3636
ENSG00000041982	101.378	0.817022	0.224845	3.55887	0.00037246	0.00571681	coding	protein_coding	ENSG00000041982	TNC	63.3044	98.9194	33.2529	254.215	125.75	149.634	129.119	72.5739	66.7275	175.733	104.029	72.7806	62.032	61.4987	51.1018
ENSG00000041988	14.9473	-0.255677	0.225302	-1.14897	0.250567	0.570319	coding	protein_coding	ENSG00000041988	THAP3	14.3874	20.429	17.1303	18.4047	9.72651	6.60152	11.3731	10.8861	21.0718	17.4569	23.1177	9.41867	12.0842	12.5508	19.5709
ENSG00000042062	2.59452	0.036348	0.160154	0.225457	0.821624		coding	protein_coding	ENSG00000042062	FAM65C	2.30198	2.15042	0	0	4.1685	1.10025	5.35207	2.72152	1.75599	3.49138	2.88971	2.56873	3.22244	5.0203	2.17455
ENSG00000042088	78.7863	0.0608734	0.191883	0.317993	0.75049	0.917488	coding	protein_coding	ENSG00000042088	TDP1	75.9652	92.4681	66.5059	87.4222	77.1173	83.6192	95.6682	57.152	64.9715	77.9741	60.6839	100.18	96.6732	79.0697	66.3236
ENSG00000042286	174.199	-0.0706556	0.134036	-0.528104	0.597427	0.845576	coding	protein_coding	ENSG00000042286	AIFM2	185.309	178.485	163.242	161.041	171.603	168.339	157.886	180.528	201.938	180.388	141.596	163.542	162.733	215.873	180.487
ENSG00000042304	0.0829669	-0.0077184	0.0420033	-0.164938	0.868993		coding	protein_coding	ENSG00000042304	C2orf83	0.575494	0	0	0	0	0	0.669009	0	0	0	0	0	0	0	0
ENSG00000042317	27.564	-0.188173	0.224538	-0.861069	0.3892	0.70218	coding	protein_coding	ENSG00000042317	SPATA7	31.3644	21.5042	32.2453	21.8555	15.9793	30.8071	16.0562	25.4009	35.1197	22.1121	20.228	40.2434	39.4749	33.887	27.1818
ENSG00000042429	123.199	-0.448975	0.214677	-2.09346	0.0363084	0.185363	coding	protein_coding	ENSG00000042429	MED17	156.534	91.3929	208.587	95.4742	84.0648	105.624	99.6823	108.861	143.991	83.7931	124.257	140.424	91.0339	114.212	200.058
ENSG00000042445	177.649	0.205444	0.16183	1.27038	0.20395	0.516895	coding	protein_coding	ENSG00000042445	RETSAT	141.859	196.764	152.157	200.151	190.362	184.842	143.168	153.312	151.015	178.06	291.86	203.786	128.898	183.241	165.265
ENSG00000042493	64.1968	0.273548	0.208451	1.30795	0.19089	0.497363	coding	protein_coding	ENSG00000042493	CAPG	63.3044	61.287	40.3066	42.5608	107.686	64.9149	52.8517	51.7089	57.9475	96.5948	80.9118	82.1993	57.1983	50.203	53.2764
ENSG00000042753	260.443	-0.0511046	0.133035	-0.383386	0.701433	0.896535	coding	protein_coding	ENSG00000042753	AP2S1	244.585	248.374	320.437	287.573	265.395	224.452	273.625	256.73	286.226	232.758	248.515	260.298	277.935	213.363	266.382
ENSG00000042781	0.117066	0	0.0419558	0	1		coding	protein_coding	ENSG00000042781	USH2A	0	0	0	0	0	0	0	0	1.75599	0	0	0	0	0	0
ENSG00000042813	0						coding	protein_coding	ENSG00000042813	ZPBP	0	0	0	0	0	0	0	0	0	0	0	0	0	0	0
ENSG00000042832	3.68433	0.326539	0.136071	1.67957	0.0930417		coding	protein_coding	ENSG00000042832	TG	3.16522	0	4.03066	9.20234	6.25276	19.8045	3.34504	0	0	0	0	0	4.02805	0	5.43636
ENSG00000042980	2.03504	-0.0803661	0.0982707	-1.61608	0.106077		coding	protein_coding	ENSG00000042980	ADAM28	3.16522	0	3.023	0	0	0	2.00703	0	1.75599	16.2931	0	4.28121	0	0	0
ENSG00000043039	0.722781	-0.0878732	0.0920704	-1.18968	0.234172		coding	protein_coding	ENSG00000043039	BARX2	1.15099	1.07521	1.00767	0	0	0	0	2.72152	0	1.16379	0	0.856242	1.61122	1.25508	0
ENSG00000043093	184.205	0.0217092	0.136474	0.159617	0.873183	0.962654	coding	protein_coding	ENSG00000043093	DCUN1D1	161.426	193.538	200.525	196.7	184.804	177.141	196.02	150.591	163.307	173.405	234.066	200.361	181.262	169.435	180.487
ENSG00000043143	223.573	-0.22048	0.196	-1.12882	0.258975	0.5792	coding	protein_coding	ENSG00000043143	JADE2	237.967	188.162	283.154	180.596	144.508	255.259	266.934	151.498	182.623	157.112	164.713	247.454	252.156	308.748	332.705
ENSG00000043355	115.964	0.776327	0.164843	4.70723	2.51103e-06	7.67511e-05	coding	protein_coding	ENSG00000043355	ZIC2	84.3099	59.1366	82.6285	174.844	139.645	122.128	118.415	114.304	136.967	124.526	132.927	100.18	125.675	104.171	119.6
ENSG00000043462	0						coding	protein_coding	ENSG00000043462	LCP2	0	0	0	0	0	0	0	0	0	0	0	0	0	0	0
ENSG00000043514	50.7504	-0.0750932	0.221136	-0.356193	0.721696	0.904838	coding	protein_coding	ENSG00000043514	TRIT1	63.0166	35.482	40.3066	44.8614	47.9378	36.3083	45.4926	71.6668	68.4835	34.9138	20.228	62.5057	52.3647	53.9682	83.72
ENSG00000043591	5.2512	0.265894	0.188541	1.66468	0.0959761	0.338825	coding	protein_coding	ENSG00000043591	ADRB1	2.01423	2.15042	2.01533	9.20234	4.1685	4.40101	6.69009	5.44304	3.51197	6.98275	2.88971	9.41867	0.80561	12.5508	6.52364
ENSG00000044012	0.133349	-0.00274757	0.0420154	-0.0700207	0.944177		coding	protein_coding	ENSG00000044012	GUCA2B	0.287747	0	0	0	0	0	0	0	0	0	0	1.71248	0	0	0
ENSG00000044090	62.0155	0.102537	0.200859	0.510284	0.609853	0.852858	coding	protein_coding	ENSG00000044090	CUL7	52.37	51.6101	70.5366	58.6649	68.7803	62.7144	52.8517	40.8228	54.4356	114.052	63.5736	61.6494	70.0881	60.2436	47.84
ENSG00000044115	1340.92	0.392679	0.136804	2.87052	0.00409794	0.039248	coding	protein_coding	ENSG00000044115	CTNNA1	1232.13	1171.98	974.412	1376.9	1506.22	1696.59	1332	1065.02	1339.82	1396.55	1976.56	1287.79	1245.47	1331.63	1180.78
ENSG00000044446	119.515	-0.198178	0.215744	-0.919495	0.357836	0.676312	coding	protein_coding	ENSG00000044446	PHKA2	130.637	109.671	148.127	101.226	62.5276	152.935	96.3372	93.4389	98.3352	101.25	222.507	172.961	83.7835	76.5596	142.433
ENSG00000044459	94.0901	-0.120505	0.159203	-0.765208	0.444148	0.743805	coding	protein_coding	ENSG00000044459	CNTLN	87.7629	104.295	88.6745	83.9713	77.1173	92.4212	78.943	102.511	105.359	103.578	98.2501	95.0429	105.535	104.171	83.72
ENSG00000044524	0						coding	protein_coding	ENSG00000044524	EPHA3	0	0	0	0	0	0	0	0	0	0	0	0	0	0	0
ENSG00000044574	1503.83	-0.0597722	0.0594886	-1.00406	0.315348	0.637196	coding	protein_coding	ENSG00000044574	HSPA5	1569.08	1545.08	1627.38	1602.36	1490.93	1454.53	1525.34	1402.49	1504.88	1395.39	1433.29	1491.57	1526.63	1477.22	1511.31
ENSG00000046604	896.139	-0.114208	0.0849569	-1.34308	0.179246	0.480411	coding	protein_coding	ENSG00000046604	DSG2	968.844	953.712	988.519	856.968	990.02	826.29	844.958	831.879	844.629	898.448	950.714	886.211	922.424	908.674	769.789
ENSG00000046647	25.8965	-0.0978497	0.223895	-0.418692	0.675441	0.88439	coding	protein_coding	ENSG00000046647	GEMIN8	21.581	37.6324	36.2759	20.7053	22.232	40.7093	35.4575	19.9578	19.3158	22.1121	20.228	23.1185	23.3627	25.1015	20.6582
ENSG00000046651	114.816	-0.130266	0.177551	-0.752368	0.45183	0.748294	coding	protein_coding	ENSG00000046651	OFD1	84.8854	92.4681	133.012	97.7748	86.8438	89.1205	127.781	123.376	101.847	107.069	98.2501	149.842	132.926	131.783	165.265
ENSG00000046653	0						coding	protein_coding	ENSG00000046653	GPM6B	0	0	0	0	0	0	0	0	0	0	0	0	0	0	0
ENSG00000046774	0						coding	protein_coding	ENSG00000046774	MAGEC2	0	0	0	0	0	0	0	0	0	0	0	0	0	0	0
ENSG00000046889	0.319306	0.00463096	0.0421528	0.158007	0.874451		coding	protein_coding	ENSG00000046889	PREX2	1.15099	0	0	2.30058	0	0	1.33802	0	0	0	0	0	0	0	0
ENSG00000047056	70.7917	0.365349	0.202558	1.80184	0.0715707	0.284268	coding	protein_coding	ENSG00000047056	WDR37	63.0166	73.1143	46.3526	93.1737	77.8121	89.1205	60.2108	78.9241	61.4595	96.5948	63.5736	59.937	89.4227	43.9276	65.2364
ENSG00000047188	217.09	-0.243056	0.156436	-1.5567	0.119541	0.384309	coding	protein_coding	ENSG00000047188	YTHDC2	216.674	256.975	225.717	203.602	146.592	226.652	200.703	196.857	158.039	210.646	182.052	259.441	289.214	247.25	235.938
ENSG00000047230	125.83	-0.312063	0.204259	-1.53886	0.123839	0.392164	coding	protein_coding	ENSG00000047230	CTPS2	136.68	134.401	130.996	85.1216	100.044	111.126	137.816	149.684	100.091	125.69	260.074	100.18	117.619	114.212	83.72
ENSG00000047249	99.799	0.0193127	0.199486	0.0929159	0.92597	0.981078	coding	protein_coding	ENSG00000047249	ATP6V1H	97.834	80.6408	95.7282	104.677	95.1808	80.3184	94.9992	108.861	61.4595	139.655	135.816	90.7617	66.8656	126.763	117.425
ENSG00000047315	582.359	-0.367214	0.123787	-2.97083	0.00296996	0.0305884	coding	protein_coding	ENSG00000047315	POLR2B	612.614	560.185	648.936	523.383	458.535	399.392	579.362	491.688	579.475	607.5	780.221	543.714	647.711	684.016	618.658
ENSG00000047346	58.1962	0.0804152	0.216556	0.372362	0.709623	0.89932	coding	protein_coding	ENSG00000047346	FAM214A	41.7233	68.8135	54.4139	64.4164	52.8011	60.5139	46.1616	42.6372	33.3637	70.9913	49.125	75.3493	59.6151	111.702	41.3164
ENSG00000047365	71.7804	0.686417	0.226279	3.03123	0.00243557	0.0261061	coding	protein_coding	ENSG00000047365	ARAP2	58.9882	23.6546	42.3219	136.885	95.8756	92.4212	75.598	97.0676	64.9715	157.112	63.5736	36.8184	45.9198	53.9682	31.5309
ENSG00000047410	510.109	-0.227165	0.226285	-1.07861	0.280763	0.602218	coding	protein_coding	ENSG00000047410	TPR	261.85	750.497	322.453	231.209	277.206	446.703	321.793	403.692	746.294	853.06	904.478	577.107	629.987	488.224	437.084
ENSG00000047457	37.0083	0.204124	0.204714	0.964479	0.334806	0.655453	coding	protein_coding	ENSG00000047457	CP	15.2506	69.8887	8.06132	56.3643	42.3798	49.5114	20.0703	86.1815	19.3158	24.4396	75.1324	25.6873	25.7795	25.1015	11.96
ENSG00000047578	160.46	-0.0124504	0.211343	-0.0611191	0.951264	0.988785	coding	protein_coding	ENSG00000047578	KIAA0556	182.432	166.658	99.7588	103.526	182.719	157.336	200.034	215.907	128.187	167.586	257.184	148.986	105.535	184.496	106.553
ENSG00000047579	32.5593	0.17688	0.210599	0.839226	0.401343	0.710121	coding	protein_coding	ENSG00000047579	DTNBP1	29.3502	23.6546	37.2836	26.4567	44.464	35.2081	32.7814	28.1224	21.0718	30.2586	37.5662	33.3934	36.2525	30.1218	42.4036
ENSG00000047597	11.9236	-0.246339	0.222891	-1.10869	0.267563	0.588772	coding	protein_coding	ENSG00000047597	XK	12.0854	19.3538	12.092	6.90175	14.5898	5.50126	11.3731	13.6076	14.0479	13.9655	11.5588	10.2749	18.529	6.27538	8.69818
ENSG00000047617	0						coding	protein_coding	ENSG00000047617	ANO2	0	0	0	0	0	0	0	0	0	0	0	0	0	0	0
ENSG00000047621	87.9625	0.237221	0.188164	1.25984	0.207726	0.52218	coding	protein_coding	ENSG00000047621	C12orf4	79.9937	62.3622	86.6592	92.0234	106.297	84.7194	98.3443	61.6878	52.6796	108.233	95.3604	111.311	101.507	72.7944	105.465
ENSG00000047634	76.959	0.362351	0.19295	1.88001	0.0601067	0.255777	coding	protein_coding	ENSG00000047634	SCML1	57.8372	82.7912	55.4216	97.7748	101.434	69.3159	84.9641	64.4094	43.8997	93.1034	66.4633	89.0492	81.3666	82.835	83.72
ENSG00000047644	433.499	-0.110029	0.144135	-0.76363	0.445088	0.744502	coding	protein_coding	ENSG00000047644	WWC3	467.014	448.363	428.258	419.857	379.334	436.8	400.067	364.684	460.068	364.267	427.677	502.614	440.669	589.885	372.935
ENSG00000047648	0.267367	0.00948146	0.042059	0.300684	0.763656		coding	protein_coding	ENSG00000047648	ARHGAP6	0	0	0	0	0.694751	0	0	0	0	0	0	0	0.80561	2.51015	0
ENSG00000047662	0.410817	0.0118229	0.0476276	0.339481	0.734248		coding	protein_coding	ENSG00000047662	FAM184B	0	0	0	1.15029	0	0	1.33802	0	0	1.16379	0	0	0	2.51015	0
ENSG00000047849	1175.52	-0.0292358	0.130138	-0.224277	0.822542	0.946239	coding	protein_coding	ENSG00000047849	MAP4	1388.67	1046.18	1223.31	1108.88	1300.57	1172.87	1253.05	1135.78	1171.24	1126.55	878.471	1359.71	1247.89	1191.07	1028.56
ENSG00000047932	303.772	-0.383519	0.118531	-3.23283	0.00122572	0.015162	coding	protein_coding	ENSG00000047932	GOPC	368.316	342.992	336.56	249.613	273.037	265.161	298.378	246.751	335.393	322.37	277.412	259.441	347.218	333.85	300.087
ENSG00000047936	40.5591	0.00591574	0.224907	0.0254238	0.979717	0.995689	coding	protein_coding	ENSG00000047936	ROS1	37.1194	46.2341	34.2606	50.6129	38.2113	29.7068	39.4715	36.287	10.5359	38.4051	28.8971	106.174	42.6973	50.203	19.5709
ENSG00000048028	91.3267	-0.101103	0.214908	-0.475914	0.634135	0.864102	coding	protein_coding	ENSG00000048028	USP28	92.9423	98.9194	81.6209	57.5146	70.8646	117.727	74.929	108.861	50.9236	124.526	92.4706	67.6431	84.5891	143.079	103.291
ENSG00000048052	16.4169	0.581893	0.197492	3.27716	0.00104857	0.0133902	coding	protein_coding	ENSG00000048052	HDAC9	2.58972	1.07521	10.0767	21.8555	38.2113	22.0051	8.0281	11.7933	1.75599	47.7155	43.3456	6.84994	15.3066	11.2957	4.34909
ENSG00000048140	188.017	0.0702932	0.161508	0.434608	0.663847	0.879362	coding	protein_coding	ENSG00000048140	TSPAN17	184.446	203.215	154.173	165.642	218.846	187.043	149.858	218.629	163.307	178.06	147.375	226.904	194.958	207.087	220.716
ENSG00000048162	182.47	0.0195569	0.136552	0.141664	0.887345	0.967405	coding	protein_coding	ENSG00000048162	NOP16	156.247	176.335	199.518	167.943	195.225	168.339	209.4	185.971	172.087	151.293	202.28	166.111	183.679	189.516	213.105
ENSG00000048342	76.3628	-0.0573744	0.226015	-0.260247	0.794673	0.935896	coding	protein_coding	ENSG00000048342	CC2D2A	81.1447	86.0169	52.3986	58.6649	86.8438	57.2131	125.774	40.8228	54.4356	86.1206	106.919	57.3682	53.9759	64.0088	133.735
ENSG00000048392	162.513	-0.723792	0.169121	-4.26994	1.95524e-05	0.000466273	coding	protein_coding	ENSG00000048392	RRM2B	201.423	253.75	189.441	113.879	133.392	102.323	117.077	178.713	154.527	121.034	161.824	141.28	176.429	228.424	164.178
ENSG00000048405	159.586	0.465791	0.14995	3.10601	0.00189631	0.0214588	coding	protein_coding	ENSG00000048405	ZNF800	124.019	138.702	143.088	186.347	217.457	176.04	132.464	150.591	158.039	199.009	161.824	214.061	149.038	143.079	100.029
ENSG00000048462	0.0766861	0.0111095	0.0419558	0.30069	0.763651		coding	protein_coding	ENSG00000048462	TNFRSF17	0	0	0	1.15029	0	0	0	0	0	0	0	0	0	0	0
ENSG00000048471	76.1126	-0.00303774	0.204332	-0.0191456	0.984725	0.996303	coding	protein_coding	ENSG00000048471	SNX29	62.1534	90.3177	59.4522	79.3702	69.4751	60.5139	78.274	53.5233	91.3113	76.8103	135.816	64.2182	66.8656	75.3045	78.2836
ENSG00000048540	0.0983079	0	0.0419945	0	1		coding	protein_coding	ENSG00000048540	LMO3	0	0	0	0	0	0	0.669009	0	0	0	0	0	0.80561	0	0
ENSG00000048544	124.895	0.0150608	0.127964	0.123092	0.902034	0.972569	coding	protein_coding	ENSG00000048544	MRPS10	133.227	121.499	133.012	128.833	134.087	130.93	117.746	107.047	112.383	114.052	127.147	131.861	124.87	122.997	133.735
ENSG00000048545	0.0766861	0.0111095	0.0419558	0.30069	0.763651		coding	protein_coding	ENSG00000048545	GUCA1A	0	0	0	1.15029	0	0	0	0	0	0	0	0	0	0	0
ENSG00000048649	223.599	-0.314259	0.197983	-1.59457	0.110809	0.369702	coding	protein_coding	ENSG00000048649	RSF1	177.54	273.104	291.215	161.041	165.351	223.351	189.329	223.165	219.498	207.155	173.382	273.141	361.719	168.18	246.811
ENSG00000048707	377.267	-0.37259	0.211002	-1.74785	0.0804896	0.304334	coding	protein_coding	ENSG00000048707	VPS13D	454.065	463.416	564.292	278.371	497.441	238.755	250.878	600.549	407.389	431.767	257.184	254.304	269.879	311.259	379.458
ENSG00000048740	0.551117	-0.0131772	0.0879735	-0.118936	0.905326		coding	protein_coding	ENSG00000048740	CELF2	0.287747	1.07521	0	0	0.694751	0	1.33802	1.81435	0	1.16379	0	0	0.80561	0	1.08727
ENSG00000048828	1202.42	-0.0286085	0.0748579	-0.381902	0.702534	0.896856	coding	protein_coding	ENSG00000048828	FAM120A	1240.48	1244.02	1193.08	1286.03	1181.77	1139.86	1243.02	1124.9	1192.31	1112.59	1193.45	1100.27	1151.22	1300.26	1333
ENSG00000048991	325.02	-0.53523	0.179847	-2.98025	0.0028801	0.0299013	coding	protein_coding	ENSG00000048991	R3HDM1	438.239	402.129	334.545	274.92	167.435	302.569	319.786	274.874	282.714	245.56	291.86	401.578	307.743	411.665	419.687
ENSG00000049089	0.0775862	0	0.0419558	0	1		coding	protein_coding	ENSG00000049089	COL9A2	0	0	0	0	0	0	0	0	0	1.16379	0	0	0	0	0
ENSG00000049130	97.9309	0.478934	0.170495	2.8153	0.00487318	0.044853	coding	protein_coding	ENSG00000049130	KITLG	64.4553	102.145	59.4522	117.33	114.634	99.0227	90.9852	87.9959	105.359	112.888	101.14	115.593	107.146	101.661	89.1564
ENSG00000049167	44.8752	-0.234716	0.207401	-1.12766	0.259463	0.579926	coding	protein_coding	ENSG00000049167	ERCC8	52.9455	60.2118	40.3066	56.3643	29.1795	38.5088	49.5066	46.2659	33.3637	41.8965	46.2353	53.9433	49.9478	36.3972	38.0545
ENSG00000049192	17.0033	0.215113	0.202106	1.06682	0.286053	0.608081	coding	protein_coding	ENSG00000049192	ADAMTS6	14.6751	8.60169	14.1073	13.8035	21.5373	29.7068	9.36612	8.16457	52.6796	12.8017	2.88971	23.1185	19.3346	18.8261	5.43636
ENSG00000049239	245.001	0.0271753	0.148337	0.182854	0.854913	0.956578	coding	protein_coding	ENSG00000049239	H6PD	219.263	310.736	191.456	271.469	239.689	222.251	260.913	283.038	242.326	264.181	262.963	241.46	251.35	200.812	213.105
ENSG00000049245	355.085	0.11559	0.119511	0.967751	0.333169	0.654392	coding	protein_coding	ENSG00000049245	VAMP3	360.835	365.572	310.361	373.845	382.808	376.286	398.06	316.604	421.437	306.077	312.088	338.216	332.717	322.554	408.815
ENSG00000049246	13.4343	-0.547772	0.224604	-2.47867	0.0131872	0.0916975	coding	protein_coding	ENSG00000049246	PER3	19.2791	19.3538	15.115	8.05204	6.25276	7.70177	16.7252	12.7004	22.8278	4.65517	20.228	19.6936	11.2785	10.0406	7.61091
ENSG00000049247	0						coding	protein_coding	ENSG00000049247	UTS2	0	0	0	0	0	0	0	0	0	0	0	0	0	0	0
ENSG00000049249	6.20966	0.464331	0.207398	2.11608	0.0343379	0.17832	coding	protein_coding	ENSG00000049249	TNFRSF9	4.8917	4.30084	2.01533	11.5029	11.116	9.90227	5.35207	3.6287	5.26796	2.32758	11.5588	6.84994	3.22244	2.51015	8.69818
ENSG00000049283	0.519248	-0.0963703	0.0799419	-1.14028	0.254168		coding	protein_coding	ENSG00000049283	EPN3	0.575494	2.15042	1.00767	0	0	0	0	0.907174	0	0	0	0	0.80561	1.25508	1.08727
ENSG00000049319	0.589249	0.0720096	0.0607343	0.865644	0.386686		other	processed_transcript	ENSG00000049319	SRD5A2	0.287747	0	0	0	3.47375	1.10025	0	0	0	0	2.88971	0	0	0	1.08727
ENSG00000049323	194.411	0.0845416	0.184837	0.452253	0.651087	0.872691	coding	protein_coding	ENSG00000049323	LTBP1	164.016	115.048	170.295	162.191	150.761	173.84	177.287	283.038	198.426	251.379	216.728	345.922	210.264	155.629	141.345
ENSG00000049449	895.928	0.131342	0.0585526	2.24363	0.0248562	0.143552	coding	protein_coding	ENSG00000049449	RCN1	871.586	863.394	866.592	951.292	978.904	920.911	899.817	871.794	885.017	915.905	875.581	879.361	874.087	906.164	878.516
ENSG00000049540	1.34926	-0.211762	0.085445	-1.68287	0.0924		coding	protein_coding	ENSG00000049540	ELN	0.575494	16.1282	1.00767	0	0.694751	0	0.669009	0	0	1.16379	0	0	0	0	0
ENSG00000049541	147.025	-0.0757404	0.157834	-0.488742	0.625024	0.860522	coding	protein_coding	ENSG00000049541	RFC2	136.68	127.95	143.088	143.787	138.255	100.123	138.485	166.92	147.503	197.845	184.941	139.567	127.286	153.119	159.829
ENSG00000049618	499.921	-0.407808	0.103281	-3.94753	7.89616e-05	0.00153948	coding	protein_coding	ENSG00000049618	ARID1B	577.221	594.592	549.177	377.296	406.429	494.013	492.39	508.017	558.404	418.965	508.589	489.771	487.394	523.366	513.193
ENSG00000049656	575.055	0.0429137	0.166952	0.256768	0.797358	0.937063	coding	protein_coding	ENSG00000049656	CLPTM1L	557.366	611.795	445.388	504.978	710.035	454.404	563.305	591.477	507.48	460.862	800.449	546.283	579.234	593.651	699.116
ENSG00000049759	331.659	1.17315	0.158603	7.38371	1.53944e-13	1.82333e-11	coding	protein_coding	ENSG00000049759	NEDD4L	218.976	163.432	214.633	432.51	580.812	534.723	280.984	288.481	368.757	385.215	317.868	284.272	237.655	350.166	316.396
ENSG00000049768	0.64097	0.0354202	0.0699833	0.506708	0.61236		coding	protein_coding	ENSG00000049768	FOXP3	0.575494	0	0	1.15029	1.3895	0	0	0	1.75599	0	0	2.56873	0	0	2.17455
ENSG00000049769	22.456	-0.250361	0.225871	-1.15836	0.246718	0.566495	coding	protein_coding	ENSG00000049769	PPP1R3F	23.883	27.9555	17.1303	18.4047	18.0635	9.90227	15.3872	11.7933	28.0958	29.0948	34.6765	13.6999	21.7515	21.3363	45.6655
ENSG00000049860	391.421	0.175542	0.124378	1.41217	0.157901	0.450019	coding	protein_coding	ENSG00000049860	HEXB	422.125	351.594	361.752	500.377	393.924	413.695	430.173	333.84	349.441	398.017	419.008	369.04	339.967	399.114	389.244
ENSG00000049883	57.3913	-0.250085	0.204122	-1.24467	0.213255	0.528839	coding	protein_coding	ENSG00000049883	PTCD2	56.1107	69.8887	51.3909	62.1158	42.3798	34.1078	47.4996	50.8017	79.0194	54.6982	49.125	64.2182	65.2544	52.7132	81.5455
ENSG00000050030	0.731297	0.0347251	0.0866414	0.45921	0.646083		coding	protein_coding	ENSG00000050030	KIAA2022	0.287747	1.07521	0	1.15029	1.3895	0	0	0	3.51197	0	0	0.856242	1.61122	0	1.08727
ENSG00000050130	274.902	-0.109315	0.137676	-0.792892	0.42784	0.731933	coding	protein_coding	ENSG00000050130	JKAMP	288.898	337.616	252.924	294.475	284.848	226.652	273.625	283.945	284.47	301.422	222.507	267.148	290.02	289.922	225.065
ENSG00000050165	70.1978	0.298877	0.193589	1.54399	0.122592	0.390297	coding	protein_coding	ENSG00000050165	DKK3	63.0166	61.287	44.3373	101.226	51.4115	74.8172	68.2389	71.6668	77.2634	72.1551	83.8015	67.6431	82.1722	66.519	67.4109
ENSG00000050327	1.28276	0.000779946	0.0973375	-0.00384623	0.996931		coding	protein_coding	ENSG00000050327	ARHGEF5	1.15099	2.15042	0	3.45088	0	0	2.00703	2.72152	0	1.16379	0	2.56873	4.02805	0	0
ENSG00000050344	46.1512	0.389263	0.209605	1.85668	0.0633566	0.264013	coding	protein_coding	ENSG00000050344	NFE2L3	38.5581	44.0836	23.1763	59.8152	56.9696	40.7093	40.8095	37.1941	24.5838	53.5345	89.5809	82.1993	37.0581	31.3769	32.6182
ENSG00000050393	143.797	-0.16571	0.180124	-0.918886	0.358155	0.676473	coding	protein_coding	ENSG00000050393	MCUR1	156.534	145.153	160.219	135.734	134.087	130.93	126.443	131.54	200.182	110.56	193.61	136.143	155.483	97.8959	142.433
ENSG00000050405	92.296	0.378649	0.203992	1.85736	0.0632597	0.263824	coding	protein_coding	ENSG00000050405	LIMA1	79.7059	84.9416	57.4369	78.2199	124.36	117.727	97.0063	80.7385	126.431	125.69	83.8015	83.0555	111.98	70.2842	63.0618
ENSG00000050426	64.1513	-0.0637723	0.174875	-0.371465	0.710291	0.899801	coding	protein_coding	ENSG00000050426	LETMD1	68.1961	52.6853	66.5059	56.3643	54.1906	70.4162	72.2529	69.8524	80.7754	68.6638	54.9044	55.6557	61.2264	57.7335	72.8473
ENSG00000050438	14.3907	-0.261181	0.213502	-1.17138	0.241448	0.561653	coding	protein_coding	ENSG00000050438	SLC4A8	17.8403	20.429	20.1533	11.5029	15.9793	6.60152	8.69711	14.5148	1.75599	24.4396	31.7868	7.70618	11.2785	18.8261	4.34909
ENSG00000050555	5.64636	0.00053086	0.135322	0.00351116	0.997199	0.999261	coding	protein_coding	ENSG00000050555	LAMC3	2.30198	2.15042	12.092	11.5029	4.86325	0	10.0351	2.72152	0	12.8017	0	0.856242	1.61122	15.0609	8.69818
ENSG00000050628	0.200408	0.0183111	0.0420288	0.528336	0.597266		coding	protein_coding	ENSG00000050628	PTGER3	0	0	0	0	0	2.20051	0	0	0	0	0	0	0.80561	0	0
ENSG00000050730	1.41654	0.00811333	0.116429	0.0768377	0.938753		coding	protein_coding	ENSG00000050730	TNIP3	2.30198	2.15042	0	3.45088	0.694751	1.10025	0	1.81435	0	1.16379	0	1.71248	0	2.51015	4.34909
ENSG00000050748	234.555	-0.0900332	0.156362	-0.575793	0.564755	0.825628	coding	protein_coding	ENSG00000050748	MAPK9	208.041	248.374	277.108	222.006	254.279	199.146	234.822	208.65	259.886	286.293	242.735	222.623	194.958	183.241	276.167
ENSG00000050767	0						coding	protein_coding	ENSG00000050767	COL23A1	0	0	0	0	0	0	0	0	0	0	0	0	0	0	0
ENSG00000050820	322.445	0.566806	0.173299	3.26384	0.00109915	0.013874	coding	protein_coding	ENSG00000050820	BCAR1	306.738	248.374	244.863	399.151	382.113	514.918	291.019	312.975	279.202	398.017	254.294	343.353	393.943	237.209	230.502
ENSG00000051009	59.2808	-0.126151	0.184292	-0.695027	0.487038	0.774737	coding	protein_coding	ENSG00000051009	FAM160A2	50.9312	69.8887	56.4292	52.9134	50.022	52.8121	50.8447	41.73	64.9715	57.0258	80.9118	71.9244	58.8095	61.4987	68.4982
ENSG00000051108	101.808	-0.678193	0.177713	-3.7858	0.000153217	0.0026918	coding	protein_coding	ENSG00000051108	HERPUD1	140.133	168.808	115.881	63.2661	100.044	71.5164	82.2881	108.861	114.139	86.1206	106.919	79.6305	98.2844	96.6408	94.5927
ENSG00000051128	141.508	-0.0100137	0.164064	-0.0544609	0.956568	0.991048	coding	protein_coding	ENSG00000051128	HOMER3	143.298	167.733	170.295	180.596	161.877	132.03	150.527	118.84	98.3352	111.724	104.029	101.893	130.509	193.282	157.655
ENSG00000051180	41.1121	0.214115	0.221804	0.9628	0.335648	0.65647	coding	protein_coding	ENSG00000051180	RAD51	43.4498	25.8051	44.3373	54.0637	27.79	67.1154	30.1054	32.6583	45.6556	20.9483	28.8971	43.6684	53.9759	51.4581	46.7527
ENSG00000051341	269.814	-0.314952	0.173917	-1.81131	0.0700921	0.280466	coding	protein_coding	ENSG00000051341	POLQ	279.402	374.173	268.039	231.209	225.794	247.557	332.497	249.473	286.226	357.284	210.949	261.154	306.937	228.424	188.098
ENSG00000051382	132.578	-0.161809	0.204008	-0.788857	0.430196	0.73349	coding	protein_coding	ENSG00000051382	PIK3CB	165.455	130.1	144.096	100.075	102.823	176.04	129.119	112.49	217.742	108.233	121.368	127.58	82.1722	143.079	128.298
ENSG00000051523	222.488	0.38172	0.132158	2.88827	0.00387364	0.0376323	coding	protein_coding	ENSG00000051523	CYBA	195.38	190.312	183.395	217.405	236.91	311.371	220.104	229.515	193.158	246.724	236.956	207.211	240.072	214.618	214.193
ENSG00000051596	205.342	-0.408111	0.159315	-2.56296	0.0103784	0.0775138	coding	protein_coding	ENSG00000051596	THOC3	244.873	199.989	249.901	136.885	179.246	182.642	188.66	244.03	179.111	194.353	265.853	172.961	191.735	209.598	240.287
ENSG00000051620	150.98	0.296276	0.141751	2.08973	0.0366422	0.186464	coding	protein_coding	ENSG00000051620	HEBP2	114.811	135.477	129.989	167.943	145.898	161.737	158.555	149.684	177.355	138.491	144.485	176.386	162.733	170.69	130.473
ENSG00000051825	245.753	-0.581265	0.163941	-3.55214	0.000382107	0.00583966	coding	protein_coding	ENSG00000051825	MPHOSPH9	241.42	368.797	261.993	154.139	182.025	200.246	275.632	213.186	314.322	210.646	262.963	215.773	274.713	223.403	287.04
ENSG00000052126	184.742	-0.722115	0.199533	-3.60396	0.000313403	0.00492199	coding	protein_coding	ENSG00000052126	PLEKHA5	187.036	353.744	254.939	112.729	162.572	124.329	205.386	136.076	152.771	131.509	239.846	179.811	217.515	160.65	152.218
ENSG00000052344	0.155432	-0.0077184	0.0420033	-0.164938	0.868993		coding	protein_coding	ENSG00000052344	PRSS8	0.575494	0	0	0	0	0	0	0	1.75599	0	0	0	0	0	0
ENSG00000052723	78.4653	-0.0401107	0.221882	-0.166086	0.86809	0.961874	coding	protein_coding	ENSG00000052723	SIKE1	102.438	112.897	77.5902	77.0696	59.0538	146.334	51.5137	69.8524	50.9236	84.9568	49.125	82.1993	73.3105	101.661	38.0545
ENSG00000052749	288.342	0.401828	0.148702	2.70166	0.00689936	0.0579177	coding	protein_coding	ENSG00000052749	RRP12	260.123	230.095	199.518	270.319	366.828	313.572	345.877	295.739	328.369	266.508	254.294	243.173	319.827	245.995	384.895
ENSG00000052795	60.6399	0.145509	0.221941	0.652816	0.513875	0.792687	coding	protein_coding	ENSG00000052795	FNIP2	67.3328	51.6101	49.3756	43.7111	87.5386	68.2157	55.5277	38.1013	50.9236	36.0776	72.2427	86.4805	73.3105	38.9073	90.2436
ENSG00000052802	103.198	-0.200582	0.177816	-1.11712	0.263942	0.584621	coding	protein_coding	ENSG00000052802	MSMO1	127.184	103.22	125.958	132.284	88.2333	83.6192	90.9852	79.8313	77.2634	93.1034	156.044	107.03	99.09	84.09	100.029
ENSG00000052841	265.076	-0.04977	0.164785	-0.308927	0.757377	0.920681	coding	protein_coding	ENSG00000052841	TTC17	218.688	258.051	221.686	215.105	200.088	254.158	254.223	263.08	345.929	365.431	260.074	358.766	326.272	233.444	201.145
ENSG00000052850	43.8254	0.325839	0.198523	1.64205	0.10058	0.348923	coding	protein_coding	ENSG00000052850	ALX4	41.1478	33.3315	43.3296	49.4626	46.5483	66.0152	44.8236	49.8946	43.8997	38.4051	31.7868	36.8184	30.6132	50.203	51.1018
ENSG00000053108	25.7833	0.243274	0.218117	1.07317	0.283193	0.604268	coding	protein_coding	ENSG00000053108	FSTL4	18.4158	30.1059	20.1533	13.8035	51.4115	39.6091	30.1054	25.4009	1.75599	22.1121	23.1177	11.1311	24.1683	43.9276	31.5309
ENSG00000053254	215.445	0.126053	0.184176	0.683913	0.49403	0.779231	coding	protein_coding	ENSG00000053254	FOXN3	212.357	133.326	224.709	192.099	239.689	206.847	166.583	280.317	168.575	179.224	260.074	220.054	227.988	277.372	242.462
ENSG00000053328	0						coding	protein_coding	ENSG00000053328	METTL24	0	0	0	0	0	0	0	0	0	0	0	0	0	0	0
ENSG00000053371	55.6245	0.0593874	0.185956	0.320346	0.748706	0.916411	coding	protein_coding	ENSG00000053371	AKR7A2	48.3415	60.2118	56.4292	55.214	58.3591	57.2131	39.4715	58.9663	66.7275	45.3879	49.125	57.3682	60.4208	60.2436	60.8873
ENSG00000053372	231.844	0.149699	0.152584	0.979122	0.32752	0.648981	coding	protein_coding	ENSG00000053372	MRTO4	219.839	206.44	178.357	241.561	230.657	212.349	232.146	261.266	265.154	212.974	343.875	193.511	213.487	240.974	225.065
ENSG00000053438	0						coding	protein_coding	ENSG00000053438	NNAT	0	0	0	0	0	0	0	0	0	0	0	0	0	0	0
ENSG00000053501	14.3555	0.0384095	0.226157	0.176041	0.860262	0.958972	coding	protein_coding	ENSG00000053501	USE1	16.1138	13.9777	14.1073	18.4047	13.895	15.4035	9.36612	18.1435	17.5599	18.6207	2.88971	14.5561	16.1122	8.78553	17.3964
ENSG00000053524	14.3794	-0.153006	0.225979	-0.76377	0.445005	0.744498	coding	protein_coding	ENSG00000053524	MCF2L2	14.0996	11.8273	11.0843	10.3526	9.72651	9.90227	20.0703	18.1435	26.3398	13.9655	14.4485	7.70618	12.8898	18.8261	16.3091
ENSG00000053702	0.136744	-0.00274757	0.0420154	-0.0700216	0.944176		coding	protein_coding	ENSG00000053702	NRIP2	0.287747	0	0	0	0	0	0	0.907174	0	0	0	0.856242	0	0	0
ENSG00000053747	203.272	0.803173	0.221852	3.64076	0.000271834	0.00438545	coding	protein_coding	ENSG00000053747	LAMA3	61.8656	141.928	152.157	227.758	346.681	323.474	192.674	136.983	296.762	252.543	387.221	141.28	115.202	151.864	120.687
ENSG00000053770	129.293	-0.174944	0.167132	-1.04344	0.296747	0.619152	coding	protein_coding	ENSG00000053770	AP5M1	127.472	144.078	160.219	98.9251	127.139	144.133	94.3302	130.633	136.967	157.112	132.927	117.305	135.343	122.997	109.815
ENSG00000053900	71.8366	-0.155534	0.218316	-0.698775	0.484693	0.772153	coding	protein_coding	ENSG00000053900	ANAPC4	83.4467	78.4904	92.7052	65.5666	47.9378	103.424	45.4926	92.5318	43.8997	52.3707	98.2501	67.6431	71.6993	51.4581	82.6327
ENSG00000053918	4.66023	0.108452	0.19849	0.545734	0.585249		coding	protein_coding	ENSG00000053918	KCNQ1	4.60395	5.37605	1.00767	8.05204	4.1685	3.30076	3.34504	7.25739	5.26796	3.49138	5.77942	5.13745	4.83366	5.0203	3.26182
ENSG00000054116	102.92	0.153584	0.161458	0.95359	0.340291	0.661003	coding	protein_coding	ENSG00000054116	TRAPPC3	109.919	92.4681	94.7205	109.278	106.992	125.429	80.281	127.004	108.871	88.4482	89.5809	84.768	114.397	102.916	108.727
ENSG00000054118	1028.3	-0.327366	0.141008	-2.32198	0.0202342	0.12439	coding	protein_coding	ENSG00000054118	THRAP3	1105.52	1266.6	1079.21	865.02	842.733	967.122	982.774	1175.7	828.826	911.249	838.015	972.691	1045.68	1010.34	1533.05
ENSG00000054148	291.377	0.192869	0.115117	1.67659	0.0936227	0.333582	coding	protein_coding	ENSG00000054148	PHPT1	276.813	273.104	282.146	370.394	291.795	302.569	299.047	263.988	302.03	300.258	283.191	339.928	249.739	289.922	245.724
ENSG00000054179	1.42586	-0.021569	0.124644	-0.310918	0.755863		coding	protein_coding	ENSG00000054179	ENTPD2	0.575494	0	2.01533	0	1.3895	0	3.34504	3.6287	0	2.32758	2.88971	1.71248	2.41683	0	1.08727
ENSG00000054219	6.48508	-0.0435984	0.211793	-0.142015	0.887068	0.967405	coding	protein_coding	ENSG00000054219	LY75	9.20791	12.9025	5.03833	10.3526	10.4213	4.40101	3.34504	6.35022	5.26796	5.81896	5.77942	4.28121	7.25049	2.51015	4.34909
ENSG00000054267	212.155	-0.231737	0.194006	-1.21609	0.22395	0.542805	coding	protein_coding	ENSG00000054267	ARID4B	126.033	258.051	201.533	161.041	113.244	194.745	222.78	224.072	217.742	238.577	265.853	239.748	198.18	210.853	309.873
ENSG00000054277	228.913	0.342248	0.118735	2.88221	0.00394897	0.0382596	coding	protein_coding	ENSG00000054277	OPN3	191.352	202.14	192.464	242.712	256.363	255.259	206.055	235.865	214.23	263.017	320.758	224.335	218.32	202.067	208.756
ENSG00000054282	132.052	-0.198853	0.170578	-1.17457	0.240168	0.560511	coding	protein_coding	ENSG00000054282	SDCCAG8	114.236	117.198	168.28	124.232	100.044	112.226	148.52	150.591	172.087	174.569	130.037	119.018	98.2844	124.252	127.211
ENSG00000054356	0						coding	protein_coding	ENSG00000054356	PTPRN	0	0	0	0	0	0	0	0	0	0	0	0	0	0	0
ENSG00000054392	19.771	0.122164	0.218876	0.568748	0.569527	0.828441	coding	protein_coding	ENSG00000054392	HHAT	20.1423	21.5042	19.1456	23.0058	24.3163	22.0051	14.0492	18.1435	12.2919	18.6207	20.228	18.8373	20.9459	15.0609	28.2691
ENSG00000054523	321.256	0.152185	0.166267	0.915087	0.360146	0.677981	coding	protein_coding	ENSG00000054523	KIF1B	320.263	283.856	277.108	312.879	347.375	341.078	387.356	354.705	307.298	272.327	190.721	351.916	379.442	430.491	262.033
ENSG00000054598	184.739	0.339754	0.122221	2.77976	0.00543995	0.0486277	coding	protein_coding	ENSG00000054598	FOXC1	151.643	156.981	170.295	212.804	213.288	187.043	210.738	185.064	186.135	194.353	193.61	182.38	163.539	163.16	200.058
ENSG00000054611	54.7027	-0.0944965	0.218602	-0.433987	0.664298	0.879362	coding	protein_coding	ENSG00000054611	TBC1D22A	53.521	66.6631	50.3833	37.9596	43.0745	72.6167	44.1546	40.8228	84.2873	60.5172	49.125	51.3745	57.1983	74.0494	34.7927
ENSG00000054654	441.457	-0.304432	0.185135	-1.65812	0.0972931	0.342039	coding	protein_coding	ENSG00000054654	SYNE2	313.357	567.711	435.311	354.29	238.299	410.394	439.539	404.6	584.743	576.077	560.603	485.489	514.785	370.247	366.411
ENSG00000054690	77.5845	0.477964	0.189551	2.52879	0.0114457	0.082999	coding	protein_coding	ENSG00000054690	PLEKHH1	53.8087	43.0084	61.4676	58.6649	84.0648	101.223	74.26	82.5528	70.2395	107.069	147.375	106.174	58.0039	45.1827	70.6727
ENSG00000054793	518.42	0.032928	0.0817814	0.402581	0.687257	0.889373	coding	protein_coding	ENSG00000054793	ATP9A	534.346	508.575	485.695	522.233	513.421	539.124	523.834	480.802	451.288	542.327	566.383	506.895	542.981	532.152	526.24
ENSG00000054796	0						coding	protein_coding	ENSG00000054796	SPO11	0	0	0	0	0	0	0	0	0	0	0	0	0	0	0
ENSG00000054803	0						coding	protein_coding	ENSG00000054803	CBLN4	0	0	0	0	0	0	0	0	0	0	0	0	0	0	0
ENSG00000054938	7.00179	0.414993	0.199024	2.19015	0.0285132	0.157893	coding	protein_coding	ENSG00000054938	CHRDL2	3.16522	1.07521	5.03833	16.1041	5.55801	9.90227	3.34504	9.07174	10.5359	6.98275	8.66912	5.9937	4.02805	2.51015	13.0473
ENSG00000054965	237.543	-0.16023	0.139962	-1.1513	0.24961	0.569454	coding	protein_coding	ENSG00000054965	FAM168A	250.052	216.117	219.671	219.706	220.236	167.238	270.28	243.123	238.814	215.302	277.412	217.486	225.571	279.882	302.262
ENSG00000054967	47.8584	0.488807	0.195277	2.51817	0.0117965	0.0848072	coding	protein_coding	ENSG00000054967	RELT	29.0625	48.3845	25.1916	56.3643	47.9378	53.9124	59.5418	57.152	52.6796	52.3707	49.125	59.937	41.8917	45.1827	39.1418
ENSG00000054983	92.6806	-0.144659	0.17971	-0.802857	0.422058	0.727204	coding	protein_coding	ENSG00000054983	GALC	111.07	98.9194	84.6439	94.324	95.8756	71.5164	92.3232	68.9452	86.0433	90.7758	60.6839	79.6305	119.23	91.6205	144.607
ENSG00000055044	354.993	-0.151698	0.15871	-0.962315	0.335891	0.656674	coding	protein_coding	ENSG00000055044	NOP58	328.032	362.346	307.338	284.122	291.101	305.87	426.828	400.064	268.666	361.939	456.574	303.966	489.811	341.38	396.855
ENSG00000055070	489.514	-0.145565	0.101294	-1.43743	0.150596	0.438357	coding	protein_coding	ENSG00000055070	SZRD1	497.515	547.282	484.687	507.279	442.556	424.698	511.792	473.545	547.868	429.439	473.912	422.984	468.059	568.549	542.549
ENSG00000055118	3.61381	-0.119093	0.163833	-0.809872	0.418014		coding	protein_coding	ENSG00000055118	KCNH2	2.01423	3.22563	8.06132	5.75146	1.3895	0	4.68306	9.07174	5.26796	2.32758	0	6.84994	3.22244	1.25508	1.08727
ENSG00000055130	457.148	0.0753401	0.0833992	0.905511	0.365194	0.682451	coding	protein_coding	ENSG00000055130	CUL1	456.942	470.942	476.626	473.92	507.168	495.114	459.609	464.473	400.365	455.043	462.353	463.227	443.086	438.021	390.331
ENSG00000055147	62.4723	0.134375	0.215874	0.623029	0.533265	0.805366	coding	protein_coding	ENSG00000055147	FAM114A2	66.1818	62.3622	51.3909	89.7228	45.1588	75.9174	54.1897	86.1815	52.6796	46.5517	78.0221	33.3934	67.6713	76.5596	51.1018
ENSG00000055163	157.852	-0.726913	0.149188	-4.86205	1.16175e-06	3.90353e-05	coding	protein_coding	ENSG00000055163	CYFIP2	239.406	181.711	172.311	111.578	118.108	107.825	197.358	174.177	152.771	139.655	127.147	126.724	186.902	174.455	157.655
ENSG00000055208	411.974	-0.188108	0.108417	-1.73312	0.0830736	0.310064	coding	protein_coding	ENSG00000055208	TAB2	450.9	448.363	453.449	365.793	439.777	366.384	373.307	367.405	437.241	403.836	471.022	385.309	364.136	433.001	419.687
ENSG00000055211	133.132	-0.172971	0.154951	-1.11663	0.264152	0.584796	coding	protein_coding	ENSG00000055211	GINM1	152.218	133.326	133.012	141.486	113.939	113.326	138.485	124.283	147.503	147.802	144.485	101.893	124.064	126.763	154.393
ENSG00000055332	476.521	0.00702418	0.134281	0.0524219	0.958193	0.991117	coding	protein_coding	ENSG00000055332	EIF2AK2	493.774	495.672	438.334	544.088	476.599	416.996	365.279	542.49	532.064	472.5	479.691	437.54	497.867	514.581	440.345
ENSG00000055483	339.578	-0.153879	0.158568	-0.974275	0.32992	0.651735	coding	protein_coding	ENSG00000055483	USP36	317.961	376.324	307.338	288.723	301.522	291.567	357.92	474.452	307.298	294.439	473.912	400.721	349.635	264.821	287.04
ENSG00000055609	751.122	-0.150008	0.182184	-0.82508	0.409326	0.717648	coding	protein_coding	ENSG00000055609	KMT2C	662.394	649.427	997.588	549.84	824.669	646.949	952.668	800.128	683.079	621.465	722.427	958.991	860.392	524.621	812.193
ENSG00000055732	37.7464	0.0943528	0.21761	0.43344	0.664695	0.879362	coding	protein_coding	ENSG00000055732	MCOLN3	29.9257	46.2341	28.2146	43.7111	35.4323	35.2081	28.0984	48.9874	45.6556	39.5689	34.6765	35.1059	41.0861	51.4581	22.8327
ENSG00000055813	11.2526	-0.0716898	0.212834	-0.350145	0.72623	0.905894	coding	protein_coding	ENSG00000055813	CCDC85A	9.49565	16.1282	10.0767	17.2544	7.64226	5.50126	16.7252	12.7004	7.02395	18.6207	5.77942	5.13745	13.6954	17.5711	5.43636
ENSG00000055917	407.779	-0.0872814	0.0931308	-0.936342	0.349097	0.668785	coding	protein_coding	ENSG00000055917	PUM2	427.017	423.633	422.212	343.937	425.187	421.397	397.391	381.92	426.705	431.767	450.794	415.278	373.803	401.624	374.022
ENSG00000055950	111.38	0.0944659	0.172434	0.546972	0.584398	0.83705	coding	protein_coding	ENSG00000055950	MRPL43	108.768	89.2425	112.858	123.081	106.992	108.925	107.041	114.304	184.379	90.7758	112.699	88.193	107.952	99.1509	116.338
ENSG00000055955	1.27267	0.0352284	0.116185	0.325267	0.744979		coding	protein_coding	ENSG00000055955	ITIH4	0.863241	2.15042	0	2.30058	0	2.20051	4.01405	0.907174	0	1.16379	0	0	0.80561	2.51015	2.17455
ENSG00000055957	0						coding	protein_coding	ENSG00000055957	ITIH1	0	0	0	0	0	0	0	0	0	0	0	0	0	0	0
ENSG00000056050	73.3812	-0.717731	0.183573	-3.89132	9.97004e-05	0.00186453	coding	protein_coding	ENSG00000056050	C4orf27	110.495	92.4681	80.6132	47.162	59.0538	45.1104	89.6472	74.3883	84.2873	61.681	72.2427	65.0744	91.8396	69.0291	57.6255
ENSG00000056097	473.663	-0.061812	0.117824	-0.523621	0.600542	0.847028	coding	protein_coding	ENSG00000056097	ZFR	461.259	526.853	514.917	475.071	459.925	496.214	542.566	475.359	447.777	451.551	505.699	422.127	528.48	407.899	389.244
ENSG00000056277	78.8251	-0.449044	0.168974	-2.66612	0.00767316	0.0623905	coding	protein_coding	ENSG00000056277	ZNF280C	82.8712	88.1673	94.7205	62.1158	60.4433	58.3134	66.2319	86.1815	101.847	73.3189	60.6839	70.2119	99.09	80.3248	97.8545
ENSG00000056291	0.0637837	-0.00285532	0.0419823	-0.0700194	0.944178		coding	protein_coding	ENSG00000056291	NPFFR2	0.287747	0	0	0	0	0	0.669009	0	0	0	0	0	0	0	0
ENSG00000056487	9.3181	-0.217327	0.181533	-1.2625	0.206768	0.520785	coding	protein_coding	ENSG00000056487	PHF21B	19.2791	10.7521	6.04599	14.9538	2.08425	0	7.3591	8.16457	3.51197	12.8017	2.88971	2.56873	12.8898	12.5508	23.92
ENSG00000056558	19.9722	1.32071	0.226004	5.84188	5.16161e-09	2.84348e-07	coding	protein_coding	ENSG00000056558	TRAF1	4.31621	3.22563	9.06899	64.4164	29.8743	31.9073	23.4153	16.3291	21.0718	23.2758	11.5588	30.8247	10.4729	10.0406	9.78545
ENSG00000056586	415.274	0.0416024	0.122597	0.337531	0.735717	0.910311	coding	protein_coding	ENSG00000056586	RC3H2	375.51	372.023	406.089	385.348	434.914	365.284	493.728	409.136	489.92	414.31	329.427	383.597	497.867	495.755	376.196
ENSG00000056661	165.651	-0.311871	0.133619	-2.33535	0.0195251	0.121534	coding	protein_coding	ENSG00000056661	PCGF2	174.95	195.688	179.364	150.688	133.392	148.534	202.71	174.177	166.819	162.931	106.919	131.005	178.04	195.792	183.749
ENSG00000056736	12.1367	0.136192	0.224998	0.607695	0.54339	0.811621	coding	protein_coding	ENSG00000056736	IL17RB	9.7834	11.8273	10.0767	8.05204	11.116	19.8045	11.3731	11.7933	17.5599	5.81896	8.66912	5.13745	12.8898	25.1015	13.0473
ENSG00000056972	53.161	0.037139	0.21672	0.177898	0.858803	0.958263	coding	protein_coding	ENSG00000056972	TRAF3IP2	57.2617	77.4152	44.3373	49.4626	51.4115	85.8197	39.4715	29.9367	59.7035	44.2241	46.2353	73.6368	44.3086	37.6523	56.5382
ENSG00000056998	43.7053	-0.487679	0.225688	-2.07633	0.0378631	0.190562	coding	protein_coding	ENSG00000056998	GYG2	47.766	59.1366	100.767	16.1041	34.7375	61.6141	40.8095	44.4515	45.6556	34.9138	26.0074	30.8247	38.6693	50.203	23.92
ENSG00000057019	7157.39	0.0986259	0.0759344	1.29887	0.19399	0.501737	coding	protein_coding	ENSG00000057019	DCBLD2	6825.94	7378.1	6854.14	8218.84	7151.07	7224.26	7193.18	6859.14	7390.95	7866.07	6585.64	6729.21	7119.18	7117.53	6847.64
ENSG00000057149	7.66007	-0.170444	0.213986	-0.799604	0.42394	0.728681	coding	protein_coding	ENSG00000057149	SERPINB3	7.19368	7.52647	13.0996	3.45088	4.86325	11.0025	6.69009	2.72152	5.26796	8.14655	2.88971	8.56242	8.0561	11.2957	14.1345
ENSG00000057252	169.698	-0.0638491	0.149275	-0.426296	0.669892	0.881427	coding	protein_coding	ENSG00000057252	SOAT1	188.762	168.808	169.288	179.446	186.888	135.331	168.59	183.249	138.723	133.836	196.5	158.405	198.18	164.415	175.051
ENSG00000057294	59.0666	0.622508	0.191552	3.23532	0.00121505	0.0150815	coding	protein_coding	ENSG00000057294	PKP2	52.6577	45.1588	40.3066	73.6187	84.0648	88.0202	72.9219	51.7089	63.2155	53.5345	57.7942	42.8121	70.0881	47.6929	42.4036
ENSG00000057468	0.117951	0.0105724	0.0419945	0.300687	0.763653		coding	protein_coding	ENSG00000057468	MSH4	0	0	0	0	0	1.10025	0.669009	0	0	0	0	0	0	0	0
ENSG00000057593	0.474365	-0.00297238	0.0482884	-0.0807401	0.935649		coding	protein_coding	ENSG00000057593	F7	0.287747	0	0	0	0	0	0	0	3.51197	0	0	0	0.80561	2.51015	0
ENSG00000057608	1527.98	-0.175118	0.0621092	-2.81848	0.00482521	0.044493	coding	protein_coding	ENSG00000057608	GDI2	1708.35	1576.26	1742.25	1487.33	1540.96	1413.82	1332	1420.63	1397.77	1505.95	1525.77	1614.02	1505.69	1571.35	1577.63
ENSG00000057657	71.1508	0.201708	0.224337	0.877553	0.380187	0.69475	coding	protein_coding	ENSG00000057657	PRDM1	71.0735	92.4681	61.4676	131.133	77.1173	78.1179	107.041	61.6878	26.3398	62.8448	31.7868	49.6621	69.2825	92.8756	54.3636
ENSG00000057663	71.7934	-0.245819	0.208174	-1.17873	0.238505	0.558737	coding	protein_coding	ENSG00000057663	ATG5	69.9225	76.34	99.7588	71.3181	79.8963	38.5088	64.8938	47.1731	42.1437	89.612	49.125	89.9054	100.701	72.7944	84.8073
ENSG00000057704	5.10913	0.568497	0.195053	3.08109	0.00206247	0.0228123	coding	protein_coding	ENSG00000057704	TMCC3	1.15099	0	3.023	10.3526	9.03176	7.70177	3.34504	4.53587	1.75599	3.49138	5.77942	3.42497	12.0842	8.78553	2.17455
ENSG00000057757	84.9231	0.358649	0.182544	1.96611	0.0492857	0.225821	coding	protein_coding	ENSG00000057757	PITHD1	70.498	68.8135	75.5749	94.324	84.0648	116.627	86.9711	77.1098	96.5792	81.4655	63.5736	89.9054	63.6432	91.6205	113.076
ENSG00000057935	156.958	-0.351751	0.183975	-1.91125	0.0559728	0.244331	coding	protein_coding	ENSG00000057935	MTA3	178.115	161.282	204.556	174.844	115.329	111.126	122.429	166.92	151.015	97.7586	193.61	148.13	187.707	155.629	185.924
ENSG00000058056	166.268	-0.207525	0.134381	-1.54961	0.121235	0.387827	coding	protein_coding	ENSG00000058056	USP13	168.62	168.808	178.357	139.185	150.066	148.534	189.329	157.848	145.747	178.06	158.934	220.054	158.705	171.945	159.829
ENSG00000058063	131.838	0.0502851	0.212534	0.23615	0.813317	0.94286	coding	protein_coding	ENSG00000058063	ATP11B	150.492	135.477	136.035	105.827	204.951	132.03	135.14	69.8524	135.211	108.233	124.257	76.2056	203.014	161.905	98.9418
ENSG00000058085	773.521	0.847987	0.130427	6.49436	8.33859e-11	6.30407e-09	coding	protein_coding	ENSG00000058085	LAMC2	689.73	568.786	529.024	1137.64	1164.4	1123.36	850.31	650.444	623.375	918.232	768.662	710.681	703.298	572.314	592.564
ENSG00000058091	11.9544	-0.0281854	0.191066	-0.159092	0.873596	0.962663	coding	protein_coding	ENSG00000058091	CDK14	7.76917	21.5042	4.03066	3.45088	13.895	12.1028	6.69009	4.53587	0	31.4224	8.66912	21.4061	21.7515	18.8261	3.26182
ENSG00000058262	695.372	-0.209325	0.0990013	-2.11607	0.0343392	0.17832	coding	protein_coding	ENSG00000058262	SEC61A1	778.068	652.653	691.258	582.048	644.034	600.738	691.086	682.195	793.706	654.051	667.522	670.438	709.743	874.787	738.258
ENSG00000058272	461.974	-0.334311	0.176486	-1.90304	0.0570357	0.246398	coding	protein_coding	ENSG00000058272	PPP1R12A	377.524	590.291	471.587	360.041	389.06	326.775	565.981	293.017	507.48	489.957	575.052	476.927	584.873	480.694	440.345
ENSG00000058335	3.79712	0.221828	0.151772	1.83532	0.0664588		coding	protein_coding	ENSG00000058335	RASGRF1	0.863241	1.07521	1.00767	4.60117	2.779	7.70177	2.67603	0.907174	0	17.4569	5.77942	1.71248	1.61122	8.78553	0
ENSG00000058404	1.32246	0.133787	0.0858538	1.55503	0.119939		coding	protein_coding	ENSG00000058404	CAMK2B	0	0	1.00767	1.15029	9.72651	0	0	1.81435	0	1.16379	0	1.71248	0	0	3.26182
ENSG00000058453	35.2912	-0.187503	0.219619	-0.89583	0.370343	0.686925	coding	protein_coding	ENSG00000058453	CROCC	43.1621	11.8273	56.4292	11.5029	34.0428	31.9073	50.8447	28.1224	19.3158	44.2241	37.5662	39.3871	70.0881	31.3769	19.5709
ENSG00000058600	162.275	-0.238973	0.19938	-1.21528	0.224259	0.543135	coding	protein_coding	ENSG00000058600	POLR3E	181.856	166.658	121.927	159.891	135.476	80.3184	210.738	157.848	193.158	159.44	251.405	150.699	189.318	156.884	118.513
ENSG00000058668	309.262	0.245426	0.16626	1.47414	0.140445	0.421662	coding	protein_coding	ENSG00000058668	ATP2B4	265.878	222.569	433.296	373.845	384.197	366.384	322.462	289.389	272.178	364.267	268.743	343.353	264.24	232.189	235.938
ENSG00000058673	648.677	-0.0198767	0.116564	-0.171733	0.863648	0.960231	coding	protein_coding	ENSG00000058673	ZC3H11A	685.126	632.224	545.147	554.441	592.622	695.36	636.227	567.891	570.696	706.422	849.574	640.469	697.658	719.158	637.142
ENSG00000058729	95.6924	0.0768902	0.211309	0.363861	0.715962	0.902284	coding	protein_coding	ENSG00000058729	RIOK2	93.5178	120.424	63.4829	89.7228	108.381	101.223	66.9009	78.9241	77.2634	90.7758	147.375	71.0681	109.563	149.354	67.4109
ENSG00000058799	41.9021	0.0892585	0.217514	0.413817	0.679008	0.885937	coding	protein_coding	ENSG00000058799	YIPF1	44.3131	37.6324	48.3679	47.162	42.3798	55.0126	37.4645	52.6161	19.3158	20.9483	43.3456	43.6684	49.1422	33.887	53.2764
ENSG00000058804	292.851	-0.323894	0.144714	-2.24402	0.024831	0.143523	coding	protein_coding	ENSG00000058804	NDC1	307.889	259.126	338.575	226.608	285.543	185.943	301.723	320.232	275.69	286.293	288.971	312.528	292.436	326.32	384.895
ENSG00000058866	54.5846	-0.495671	0.203637	-2.44346	0.0145472	0.0982228	coding	protein_coding	ENSG00000058866	DGKG	53.8087	59.1366	83.6362	44.8614	36.8218	38.5088	55.5277	75.2954	70.2395	41.8965	63.5736	75.3493	33.03	41.4175	45.6655
ENSG00000059122	81.2234	-0.312956	0.217492	-1.39667	0.162513	0.457567	coding	protein_coding	ENSG00000059122	FLYWCH1	84.0221	144.078	121.927	67.8672	56.9696	126.529	79.612	58.0591	50.9236	54.6982	46.2353	98.4679	80.561	69.0291	79.3709
ENSG00000059145	298.539	0.767445	0.174119	4.41431	1.01335e-05	0.000260918	coding	protein_coding	ENSG00000059145	UNKL	236.816	191.388	149.134	373.845	304.301	441.201	272.956	221.35	300.274	434.095	283.191	304.822	320.633	368.992	275.08
ENSG00000059377	16.4265	-0.0360323	0.21722	-0.207941	0.835275	0.950148	coding	protein_coding	ENSG00000059377	TBXAS1	11.7976	11.8273	13.0996	12.6532	13.895	6.60152	7.3591	7.25739	33.3637	31.4224	23.1177	43.6684	16.1122	8.78553	5.43636
ENSG00000059378	65.1827	0.207409	0.216038	0.967403	0.333343	0.654392	coding	protein_coding	ENSG00000059378	PARP12	52.6577	27.9555	63.4829	80.5204	61.8328	39.6091	84.2951	91.6246	70.2395	67.5	83.8015	38.5309	73.3105	72.7944	69.5855
ENSG00000059573	296.032	-0.16344	0.114988	-1.41904	0.155888	0.446431	coding	protein_coding	ENSG00000059573	ALDH18A1	307.889	386.001	282.146	295.625	293.88	269.562	274.963	287.574	284.47	285.129	303.419	279.991	281.158	323.809	284.865
ENSG00000059588	206.585	0.155696	0.145498	1.07076	0.284279	0.605976	coding	protein_coding	ENSG00000059588	TARBP1	193.078	235.471	164.249	236.96	215.373	216.75	183.308	193.228	142.235	232.758	213.838	264.579	210.264	169.435	227.24
ENSG00000059691	53.1657	-0.0671619	0.222667	-0.29111	0.770967	0.926033	coding	protein_coding	ENSG00000059691	PET112	55.2474	50.5349	75.5749	64.4164	33.348	71.5164	58.2038	29.0296	17.5599	47.7155	60.6839	58.2245	62.8376	45.1827	67.4109
ENSG00000059728	27.9762	0.420647	0.226265	1.895	0.0580921	0.249655	coding	protein_coding	ENSG00000059728	MXD1	18.7036	12.9025	21.161	29.9076	32.6533	33.0076	18.0632	28.1224	8.77993	20.9483	66.4633	51.3745	34.6412	20.0812	22.8327
ENSG00000059758	108.145	-0.0406198	0.190227	-0.210306	0.833429	0.950148	coding	protein_coding	ENSG00000059758	CDK17	119.415	131.176	95.7282	116.18	103.518	115.527	102.358	94.3461	91.3113	109.396	80.9118	164.399	121.647	106.681	69.5855
ENSG00000059769	79.7211	0.582082	0.225917	2.70624	0.00680506	0.0574349	coding	protein_coding	ENSG00000059769	DNAJC25	35.9684	48.3845	41.3143	121.931	57.6643	101.223	90.3162	115.211	101.847	133.836	49.125	40.2434	47.531	91.6205	119.6
ENSG00000059804	692.641	0.219638	0.10843	2.02356	0.0430156	0.207599	coding	protein_coding	ENSG00000059804	SLC2A3	569.451	572.012	478.641	624.609	688.498	593.036	620.84	644.094	723.466	926.379	1034.52	790.312	718.604	743.004	662.149
ENSG00000059915	1.41079	0.00641172	0.115667	0.0583357	0.953481		coding	protein_coding	ENSG00000059915	PSD	2.87747	0	2.01533	0	4.1685	1.10025	1.33802	0	0	0	0	0.856242	1.61122	5.0203	2.17455
ENSG00000060069	107.271	0.0253115	0.169619	0.148845	0.881676	0.965727	coding	protein_coding	ENSG00000060069	CTDP1	99.5605	129.025	90.6899	85.1216	110.465	127.629	101.02	97.9748	117.651	135	83.8015	112.168	100.701	111.702	106.553
ENSG00000060138	769.341	0.32161	0.079399	4.05047	5.11149e-05	0.00105749	coding	protein_coding	ENSG00000060138	YBX3	698.074	677.383	654.982	823.609	810.079	933.014	759.994	771.098	723.466	704.094	846.684	757.774	791.109	774.381	814.367
ENSG00000060140	2.35068	-0.0889752	0.129712	-0.654991	0.512473		coding	protein_coding	ENSG00000060140	STYK1	1.43874	9.6769	0	3.45088	2.08425	0	6.69009	1.81435	0	2.32758	0	2.56873	1.61122	2.51015	1.08727
ENSG00000060237	2258.91	-0.587709	0.103658	-5.67062	1.42282e-08	7.04618e-07	coding	protein_coding	ENSG00000060237	WNK1	2903.66	2577.28	2425.45	1563.25	1680.6	1897.94	2087.98	2468.42	1850.81	2173.96	2381.12	2425.73	2572.31	2373.35	2501.81
ENSG00000060303	0						pseudo	pseudogene	ENSG00000060303	RPS17P5	0	0	0	0	0	0	0	0	0	0	0	0	0	0	0
ENSG00000060339	602.927	-0.356707	0.15239	-2.34104	0.01923	0.120245	coding	protein_coding	ENSG00000060339	CCAR1	645.704	828.987	592.507	460.117	423.103	673.355	652.283	576.963	663.763	570.258	745.545	591.663	572.789	559.764	487.098
ENSG00000060491	149.252	0.0841551	0.144694	0.584637	0.558792	0.821569	coding	protein_coding	ENSG00000060491	OGFR	146.463	153.755	155.18	161.041	156.319	168.339	132.464	147.869	172.087	132.672	127.147	139.567	185.29	135.548	125.036
ENSG00000060558	0.1467	0.018854	0.0419945	0.528338	0.597264		coding	protein_coding	ENSG00000060558	GNA15	0	0	0	0	0	2.20051	0	0	0	0	0	0	0	0	0
ENSG00000060566	0.123003	0.018854	0.0419945	0.476945	0.633402		coding	protein_coding	ENSG00000060566	CREB3L3	0	0	0	1.15029	0.694751	0	0	0	0	0	0	0	0	0	0
ENSG00000060642	17.513	0.183225	0.222176	0.82631	0.408628	0.717448	coding	protein_coding	ENSG00000060642	PIGV	15.2506	19.3538	10.0767	37.9596	11.116	13.203	11.3731	13.6076	17.5599	10.4741	20.228	16.2686	29.002	10.0406	27.1818
ENSG00000060656	70.6213	-0.201737	0.222246	-0.938402	0.348038	0.668004	coding	protein_coding	ENSG00000060656	PTPRU	73.6633	67.7383	60.4599	72.4684	60.4433	25.3058	54.1897	101.603	56.1916	40.7327	72.2427	73.6368	117.619	67.7741	115.251
ENSG00000060688	99.7267	-0.45488	0.187573	-2.43359	0.0149498	0.10007	coding	protein_coding	ENSG00000060688	SNRNP40	111.646	107.521	125.958	74.769	76.4226	78.1179	89.6472	107.954	122.919	102.414	57.7942	97.6116	135.343	74.0494	133.735
ENSG00000060709	0						coding	protein_coding	ENSG00000060709	RIMBP2	0	0	0	0	0	0	0	0	0	0	0	0	0	0	0
ENSG00000060718	7.29019	0.182743	0.140114	1.17481	0.240069	0.560372	coding	protein_coding	ENSG00000060718	COL11A1	4.8917	3.22563	5.03833	1.15029	35.4323	1.10025	1.33802	0.907174	3.51197	2.32758	28.8971	1.71248	2.41683	16.316	1.08727
ENSG00000060749	983.205	0.0247202	0.108379	0.227931	0.8197	0.945419	coding	protein_coding	ENSG00000060749	QSER1	945.825	1022.53	916.975	871.921	971.956	1092.55	936.612	894.474	1032.52	1161.46	1129.88	976.116	1073.07	869.767	852.422
ENSG00000060762	18.7457	-0.0938123	0.225074	-0.422722	0.672498	0.883001	coding	protein_coding	ENSG00000060762	MPC1	15.2506	21.5042	22.1686	17.2544	21.5373	11.0025	10.7041	15.422	17.5599	23.2758	23.1177	23.1185	24.9739	12.5508	21.7455
ENSG00000060971	86.9008	-0.0729473	0.17136	-0.422615	0.672576	0.883001	coding	protein_coding	ENSG00000060971	ACAA1	84.8854	94.6185	99.7588	83.9713	95.8756	79.2182	83.6261	72.5739	114.139	75.6465	60.6839	95.8991	88.6171	81.5799	92.4182
ENSG00000060982	139.459	-0.0668336	0.171037	-0.38493	0.700289	0.896147	coding	protein_coding	ENSG00000060982	BCAT1	137.831	162.357	170.295	128.833	172.298	138.632	96.3372	95.2533	143.991	140.819	193.61	133.574	128.092	145.589	104.378
ENSG00000061273	203.45	-0.245845	0.173604	-1.41877	0.155965	0.446562	coding	protein_coding	ENSG00000061273	HDAC7	199.984	226.869	225.717	170.243	174.382	183.742	200.703	261.266	256.374	115.215	141.596	197.792	302.104	187.006	208.756
ENSG00000061337	0.682215	0.0811234	0.0945942	0.720502	0.471216		coding	protein_coding	ENSG00000061337	LZTS1	0.575494	0	1.00767	2.30058	2.08425	0	1.33802	0.907174	0	1.16379	0	0.856242	0	0	0
ENSG00000061455	14.8991	-0.133894	0.177573	-0.827226	0.408109	0.71682	coding	protein_coding	ENSG00000061455	PRDM6	21.8688	19.3538	8.06132	10.3526	11.8108	6.60152	5.35207	34.4726	3.51197	4.65517	8.66912	65.0744	14.501	3.76523	5.43636
ENSG00000061492	0						coding	protein_coding	ENSG00000061492	WNT8A	0	0	0	0	0	0	0	0	0	0	0	0	0	0	0
ENSG00000061656	4.29715	0.00232617	0.175385	0.0487638	0.961108		coding	protein_coding	ENSG00000061656	SPAG4	8.34467	5.37605	1.00767	11.5029	2.779	2.20051	1.33802	3.6287	5.26796	3.49138	5.77942	1.71248	4.83366	5.0203	2.17455
ENSG00000061676	857.712	-0.308835	0.101512	-3.04133	0.00235534	0.0254768	coding	protein_coding	ENSG00000061676	NCKAP1	998.77	946.185	949.221	771.846	814.943	721.766	647.6	791.056	684.835	957.801	973.831	939.298	841.057	1039.2	788.273
ENSG00000061794	335.365	-0.129648	0.1235	-1.04884	0.294251	0.616659	coding	protein_coding	ENSG00000061794	MRPS35	364.288	322.563	386.943	366.943	293.88	317.973	351.23	338.376	282.714	314.224	291.86	353.628	332.717	316.279	396.855
ENSG00000061918	1.28925	0.0420192	0.122056	0.322625	0.746979		coding	protein_coding	ENSG00000061918	GUCY1B3	2.58972	1.07521	0	2.30058	1.3895	2.20051	2.67603	0.907174	0	1.16379	0	3.42497	1.61122	0	0
ENSG00000061936	308.383	-0.176766	0.125208	-1.40854	0.158971	0.451698	coding	protein_coding	ENSG00000061936	SFSWAP	367.165	288.156	366.79	292.174	316.806	288.266	295.033	320.232	272.178	240.905	312.088	278.279	371.386	323.809	292.476
ENSG00000061938	73.4113	0.150679	0.217907	0.688544	0.49111	0.777127	coding	protein_coding	ENSG00000061938	TNK2	81.4324	53.7605	81.6209	88.5725	80.5911	88.0202	101.689	102.511	42.1437	55.862	31.7868	84.768	60.4208	90.3654	57.6255
ENSG00000061987	339.792	-0.373061	0.129135	-2.88518	0.00391184	0.0379257	coding	protein_coding	ENSG00000061987	MON2	359.684	429.009	440.35	268.018	279.29	375.186	308.413	336.562	273.934	315.388	369.883	316.81	356.885	332.595	334.88
ENSG00000062038	3.80873	0.114104	0.170608	0.717398	0.473128		coding	protein_coding	ENSG00000062038	CDH3	2.87747	2.15042	2.01533	4.60117	4.1685	3.30076	4.01405	0	8.77993	10.4741	0	5.13745	2.41683	5.0203	2.17455
ENSG00000062096	0.114166	0	0.0419945	0	1		coding	protein_coding	ENSG00000062096	ARSF	0	0	0	0	0	0	0	0	0	0	0	1.71248	0	0	0
ENSG00000062194	313.303	-0.0289434	0.0994959	-0.288936	0.77263	0.926778	coding	protein_coding	ENSG00000062194	GPBP1	319.687	322.563	339.583	333.585	345.291	276.163	309.751	283.038	284.47	300.258	300.53	297.972	321.438	323.809	341.404
ENSG00000062282	14.2353	0.089334	0.223488	0.409906	0.681875	0.887464	coding	protein_coding	ENSG00000062282	DGAT2	7.48142	16.1282	9.06899	11.5029	11.8108	13.203	12.7112	15.422	26.3398	32.5862	14.4485	15.4124	13.6954	5.0203	8.69818
ENSG00000062370	23.7462	-0.151758	0.215719	-0.727801	0.466735	0.759386	coding	protein_coding	ENSG00000062370	ZNF112	12.3731	29.0307	35.2683	25.3064	14.5898	15.4035	17.3942	14.5148	82.5314	18.6207	20.228	20.5498	16.9178	22.5914	10.8727
ENSG00000062485	1216.66	-0.0423922	0.077445	-0.547142	0.584281	0.83703	coding	protein_coding	ENSG00000062485	CS	1209.69	1251.55	1282.76	1217.01	1208.87	1201.48	1099.18	1273.67	1165.97	1121.9	1268.58	1123.39	1170.55	1293.98	1361.27
ENSG00000062524	0.317019	-0.00792045	0.0445458	-0.172758	0.862842		coding	protein_coding	ENSG00000062524	LTK	0	1.07521	0	0	0	0	0.669009	0	1.75599	0	0	0	0	1.25508	0
ENSG00000062582	215.426	0.157079	0.117158	1.3402	0.180181	0.481919	coding	protein_coding	ENSG00000062582	MRPS24	184.446	204.29	214.633	211.654	216.762	244.256	210.069	218.629	221.254	209.483	179.162	220.911	211.07	234.699	250.073
ENSG00000062598	98.0598	-0.414348	0.214333	-1.95029	0.0511421	0.231861	coding	protein_coding	ENSG00000062598	ELMO2	106.754	137.627	89.6822	55.214	78.5068	80.3184	75.598	84.3672	96.5792	83.7931	193.61	83.0555	90.2283	75.3045	140.258
ENSG00000062650	310.184	-0.210628	0.168082	-1.25598	0.209125	0.523703	coding	protein_coding	ENSG00000062650	WAPAL	315.083	331.165	317.415	269.168	309.164	227.752	307.744	273.059	359.977	287.457	378.552	396.44	398.777	230.934	250.073
ENSG00000062716	3027.05	0.198537	0.0999506	1.98625	0.0470051	0.2189	coding	protein_coding	ENSG00000062716	VMP1	3233.99	2670.82	2947.42	3316.29	3564.07	3362.37	2733.57	3175.11	2326.68	2972.33	3326.05	3049.94	2789.83	2844	3093.29
ENSG00000062725	118.124	-0.620365	0.187075	-3.30927	0.000935386	0.0121978	coding	protein_coding	ENSG00000062725	APPBP2	181.568	121.499	138.05	66.7169	99.3493	89.1205	89.6472	97.0676	103.603	140.819	124.257	75.3493	140.982	158.139	145.695
ENSG00000062822	243.866	0.0862923	0.190012	0.453914	0.649891	0.872319	coding	protein_coding	ENSG00000062822	POLD1	276.237	221.493	189.441	193.249	201.478	353.181	187.322	226.794	230.034	244.396	265.853	169.536	312.577	238.464	347.927
ENSG00000063015	0.0191831	-0.00303674	0.0419456	-0.0700174	0.94418		coding	protein_coding	ENSG00000063015	SEZ6	0.287747	0	0	0	0	0	0	0	0	0	0	0	0	0	0
ENSG00000063046	2373.77	-0.208373	0.10278	-2.02723	0.0426392	0.206365	coding	protein_coding	ENSG00000063046	EIF4B	2714.61	2708.46	2266.24	2252.27	2246.13	2104.78	2490.05	2086.5	1857.83	2331.08	2028.57	2394.91	2561.03	2817.64	2746.45
ENSG00000063127	23.3273	-0.255565	0.224919	-1.18867	0.234569	0.554269	coding	protein_coding	ENSG00000063127	SLC6A16	31.3644	21.5042	21.161	12.6532	9.03176	28.6066	20.7393	26.308	19.3158	37.2414	37.5662	17.9811	16.9178	12.5508	36.9673
ENSG00000063169	143.315	-0.000358522	0.166423	-0.00703952	0.994383	0.998313	coding	protein_coding	ENSG00000063169	GLTSCR1	132.364	123.649	138.05	111.578	140.34	140.832	148.52	170.549	191.403	108.233	179.162	117.305	160.316	116.722	170.702
ENSG00000063176	54.6574	0.000808373	0.185735	0.0110615	0.991174	0.997378	coding	protein_coding	ENSG00000063176	SPHK2	55.2474	61.287	53.4062	59.8152	56.9696	52.8121	45.4926	58.0591	73.7514	43.0603	57.7942	41.0996	51.559	62.7538	46.7527
ENSG00000063177	2195.48	0.215995	0.0918825	2.35081	0.0187325	0.117807	coding	protein_coding	ENSG00000063177	RPL18	2060.27	2018.17	2041.53	2347.75	2250.99	2562.49	2262.59	2091.94	2098.4	1976.12	2649.86	2170.57	1981	2241.56	2178.89
ENSG00000063180	28.1529	0.0506062	0.22337	0.231918	0.816602	0.944037	coding	protein_coding	ENSG00000063180	CA11	19.2791	38.7076	10.0767	18.4047	29.1795	25.3058	20.0703	36.287	21.0718	47.7155	69.353	20.5498	33.8356	15.0609	17.3964
ENSG00000063241	87.1866	-0.0330231	0.177979	-0.189642	0.849589	0.955753	coding	protein_coding	ENSG00000063241	ISOC2	92.3668	68.8135	92.7052	82.821	77.8121	89.1205	101.02	82.5528	80.7754	115.215	98.2501	84.768	100.701	77.8147	63.0618
ENSG00000063244	1090.24	-0.159308	0.0753979	-2.1122	0.0346695	0.179513	coding	protein_coding	ENSG00000063244	U2AF2	1163.65	1210.69	1159.82	1037.56	1023.37	1093.65	982.105	1115.82	1097.49	1010.17	843.795	1030.92	1211.64	1198.6	1174.25
ENSG00000063245	569.067	0.255987	0.118	2.16946	0.0300475	0.163064	coding	protein_coding	ENSG00000063245	EPN1	488.595	520.402	526.001	522.233	641.255	689.858	575.347	537.954	630.399	651.724	540.375	480.352	546.204	611.222	574.08
ENSG00000063322	297.421	-0.0809865	0.183574	-0.440168	0.659816	0.877511	coding	protein_coding	ENSG00000063322	MED29	273.935	417.182	247.886	349.689	300.132	222.251	294.364	469.916	405.633	251.379	257.184	196.936	291.631	263.566	219.629
ENSG00000063438	11.4432	0.00765651	0.174132	0.0376802	0.969943	0.99398	coding	protein_coding	ENSG00000063438	AHRR	6.04269	30.1059	3.023	5.75146	30.569	2.20051	10.0351	3.6287	12.2919	31.4224	11.5588	5.13745	7.25049	5.0203	7.61091
ENSG00000063515	0						coding	protein_coding	ENSG00000063515	GSC2	0	0	0	0	0	0	0	0	0	0	0	0	0	0	0
ENSG00000063587	162.1	0.760077	0.133184	5.7083	1.14111e-08	5.81312e-07	coding	protein_coding	ENSG00000063587	ZNF275	102.15	129.025	121.927	205.902	210.509	203.547	156.548	175.992	186.135	173.405	141.596	170.392	149.038	136.803	168.527
ENSG00000063601	155.955	-0.291966	0.219371	-1.29922	0.193869	0.50163	coding	protein_coding	ENSG00000063601	MTMR1	189.625	306.435	138.05	126.532	248.026	83.6192	109.717	136.076	103.603	147.802	150.265	106.174	156.288	130.528	206.582
ENSG00000063660	380.404	0.309645	0.105461	2.93559	0.00332915	0.0333455	coding	protein_coding	ENSG00000063660	GPC1	330.621	316.112	332.529	411.805	387.671	434.6	358.589	404.6	444.265	398.017	395.89	321.947	372.192	400.369	396.855
ENSG00000063761	30.6203	-0.249897	0.221886	-1.10018	0.271253	0.591619	coding	protein_coding	ENSG00000063761	ADCK1	32.5154	33.3315	49.3756	26.4567	30.569	28.6066	31.4434	30.8439	36.8757	23.2758	40.4559	26.5435	37.0581	11.2957	20.6582
ENSG00000063854	90.192	0.219747	0.173116	1.27042	0.203936	0.516895	coding	protein_coding	ENSG00000063854	HAGH	84.3099	103.22	63.4829	100.075	93.7913	108.925	92.3232	67.1309	79.0194	84.9568	75.1324	93.3304	117.619	100.406	89.1564
ENSG00000063978	298.763	0.148996	0.148916	0.999486	0.317559	0.639281	coding	protein_coding	ENSG00000063978	RNF4	280.841	251.599	260.985	311.729	292.49	291.567	260.244	302.089	389.829	235.086	338.096	283.416	265.046	363.972	354.451
ENSG00000064012	110.051	-0.322347	0.181048	-1.77622	0.0756968	0.293395	coding	protein_coding	ENSG00000064012	CASP8	110.783	141.928	136.035	97.7748	123.666	67.1154	105.034	97.0676	89.5553	95.431	109.809	141.28	111.174	122.997	101.116
ENSG00000064042	1394.4	0.061421	0.110606	0.555805	0.578344	0.833419	coding	protein_coding	ENSG00000064042	LIMCH1	1491.68	1409.6	1451.04	1596.61	1524.98	1435.83	1600.94	1520.42	1487.32	1551.34	1043.18	1214.15	1321.2	1070.58	1197.09
ENSG00000064102	203.865	-0.295513	0.173876	-1.70961	0.0873386	0.320656	coding	protein_coding	ENSG00000064102	ASUN	232.787	237.622	156.188	163.341	129.224	199.146	218.766	236.772	291.494	161.767	216.728	224.335	225.571	187.006	177.225
ENSG00000064115	288.752	-0.42255	0.159965	-2.64701	0.00812076	0.0646858	coding	protein_coding	ENSG00000064115	TM7SF3	382.128	280.63	280.131	258.816	213.983	201.346	257.568	310.254	303.786	238.577	167.603	282.56	422.945	327.575	403.378
ENSG00000064195	0.911595	0.00826276	0.0933325	0.113435	0.909686		coding	protein_coding	ENSG00000064195	DLX3	0	1.07521	1.00767	2.30058	0	0	0.669009	0	0	1.16379	0	0	4.02805	1.25508	2.17455
ENSG00000064199	90.0271	-0.0170821	0.175496	-0.10296	0.917995	0.97763	coding	protein_coding	ENSG00000064199	SPA17	74.2387	88.1673	92.7052	71.3181	97.2651	77.0177	95.6682	108.861	119.407	61.681	101.14	94.1867	90.2283	99.1509	79.3709
ENSG00000064201	0						coding	protein_coding	ENSG00000064201	TSPAN32	0	0	0	0	0	0	0	0	0	0	0	0	0	0	0
ENSG00000064205	13.9149	-0.0189904	0.223147	-0.110925	0.911675	0.975364	coding	protein_coding	ENSG00000064205	WISP2	12.6609	15.0529	8.06132	5.75146	13.895	14.3033	16.0562	12.7004	22.8278	10.4741	17.3382	23.1185	19.3346	6.27538	10.8727
ENSG00000064218	0.0766861	0.0111095	0.0419558	0.30069	0.763651		coding	protein_coding	ENSG00000064218	DMRT3	0	0	0	1.15029	0	0	0	0	0	0	0	0	0	0	0
ENSG00000064225	2.68023	0.046434	0.156619	0.407523	0.683624		coding	protein_coding	ENSG00000064225	ST3GAL6	0.575494	1.07521	2.01533	0	1.3895	3.30076	2.00703	2.72152	3.51197	9.31034	0	5.9937	1.61122	1.25508	5.43636
ENSG00000064270	1.44247	-0.159192	0.100323	-1.55213	0.120632		coding	protein_coding	ENSG00000064270	ATP2C2	4.60395	4.30084	1.00767	0	0.694751	0	3.34504	0	5.26796	0	0	0	2.41683	0	0
ENSG00000064300	0.277424	0.0100295	0.0420288	0.300685	0.763655		coding	protein_coding	ENSG00000064300	NGFR	0	0	0	1.15029	0	0	0	0	1.75599	0	0	0	0	1.25508	0
ENSG00000064309	29.4545	-0.207812	0.205203	-1.23787	0.215765	0.531669	coding	protein_coding	ENSG00000064309	CDON	35.3929	24.7298	21.161	23.0058	10.4213	11.0025	19.4013	74.3883	19.3158	45.3879	11.5588	23.1185	13.6954	20.0812	89.1564
ENSG00000064313	213.62	-0.274893	0.172293	-1.6007	0.109444	0.366525	coding	protein_coding	ENSG00000064313	TAF2	215.81	268.803	191.456	182.896	175.077	177.141	182.639	233.144	340.661	237.414	213.838	178.098	222.348	179.476	205.495
ENSG00000064393	1213.39	0.34168	0.0830397	4.11465	3.87766e-05	0.000840139	coding	protein_coding	ENSG00000064393	HIPK2	1107.54	1056.93	1094.32	1427.51	1443.69	1295	1299.21	1161.18	1276.6	1301.12	1251.24	1054.03	1107.71	1172.24	1152.51
ENSG00000064419	351.269	-0.248437	0.114708	-2.16061	0.0307253	0.165228	coding	protein_coding	ENSG00000064419	TNPO3	414.644	419.332	398.028	353.14	355.712	314.672	329.152	297.553	423.193	364.267	323.647	318.522	318.216	338.87	300.087
ENSG00000064489	11.9751	-0.213017	0.218559	-0.94594	0.344179	0.66483	coding	protein_coding	ENSG00000064489	MEF2BNB-MEF2B	10.9344	21.5042	14.1073	8.05204	12.5055	9.90227	5.35207	0	8.77993	19.7845	5.77942	22.2623	12.8898	12.5508	15.2218
ENSG00000064490	54.977	0.0371259	0.212391	0.180096	0.857077	0.957676	coding	protein_coding	ENSG00000064490	RFXANK	55.2474	56.9862	72.5519	78.2199	71.5593	40.7093	54.1897	53.5233	50.9236	60.5172	28.8971	36.8184	40.2805	75.3045	48.9273
ENSG00000064545	40.4037	0.0807962	0.225849	0.355372	0.722311	0.905072	coding	protein_coding	ENSG00000064545	TMEM161A	28.487	24.7298	73.5596	44.8614	46.5483	47.3109	70.9149	29.9367	40.3877	33.75	31.7868	36.8184	28.1964	42.6726	26.0945
ENSG00000064547	6.44737	0.140759	0.163082	0.795779	0.42616	0.730745	coding	protein_coding	ENSG00000064547	LPAR2	7.48142	7.52647	1.00767	1.15029	4.1685	24.2056	9.36612	1.81435	8.77993	10.4741	2.88971	10.2749	3.22244	0	4.34909
ENSG00000064601	396.329	0.106081	0.110401	0.961424	0.336339	0.656964	coding	protein_coding	ENSG00000064601	CTSA	366.014	374.173	424.227	441.712	440.472	370.785	361.934	433.629	381.049	399.181	401.669	375.89	345.607	415.43	413.164
ENSG00000064607	265.76	0.171813	0.19711	0.871711	0.383366	0.69755	coding	protein_coding	ENSG00000064607	SUGP2	333.787	141.928	223.702	278.371	275.121	275.063	262.92	249.473	263.398	296.767	384.331	225.192	294.853	185.751	295.738
ENSG00000064651	951.998	-0.39045	0.111976	-3.48513	0.000491896	0.00717554	coding	protein_coding	ENSG00000064651	SLC12A2	1168.25	1096.71	1129.59	914.482	842.733	786.681	992.14	879.959	934.185	1036.94	866.912	776.612	1044.88	1005.32	804.582
ENSG00000064652	88.5142	0.0583002	0.163229	0.354065	0.72329	0.905083	coding	protein_coding	ENSG00000064652	SNX24	91.5036	69.8887	88.6745	102.376	84.0648	80.3184	88.3091	85.2744	66.7275	109.396	104.029	95.0429	97.4788	76.5596	88.0691
ENSG00000064655	42.2886	0.290649	0.210875	1.37208	0.170038	0.467186	coding	protein_coding	ENSG00000064655	EYA2	40.2846	32.2563	51.3909	55.214	50.7168	60.5139	53.5207	36.287	52.6796	34.9138	31.7868	29.1122	21.7515	33.887	50.0145
ENSG00000064666	714.468	-0.257764	0.0921433	-2.79723	0.00515436	0.0467213	coding	protein_coding	ENSG00000064666	CNN2	844.538	753.723	728.542	621.158	606.517	715.164	669.009	743.883	716.442	686.638	661.743	746.643	712.159	720.413	790.447
ENSG00000064687	60.2919	-0.214105	0.22585	-0.928799	0.352993	0.671823	coding	protein_coding	ENSG00000064687	ABCA7	41.7233	83.8664	103.79	40.2602	66.6961	64.9149	67.5699	65.3165	36.8757	25.6034	60.6839	59.937	84.5891	35.1421	67.4109
ENSG00000064692	0.145781	-0.00712354	0.0420323	-0.164939	0.868992		coding	protein_coding	ENSG00000064692	SNCAIP	0.575494	0	0	0	0	0	0	0	0	0	0	0	1.61122	0	0
ENSG00000064703	76.1123	-0.210519	0.173496	-1.21122	0.225811	0.544666	coding	protein_coding	ENSG00000064703	DDX20	88.0506	78.4904	78.5979	77.0696	75.0331	53.9124	68.9079	88.9031	86.0433	68.6638	92.4706	80.4868	60.4208	65.2639	79.3709
ENSG00000064726	448.579	-0.225985	0.0967118	-2.33758	0.0194089	0.121044	coding	protein_coding	ENSG00000064726	BTBD1	448.022	497.823	491.741	426.758	396.008	391.69	450.243	437.258	400.365	442.241	511.478	460.658	468.865	405.389	500.145
ENSG00000064763	0.150145	-0.0153817	0.0420335	-0.330868	0.740744		coding	protein_coding	ENSG00000064763	FAR2	0.575494	0	1.00767	0	0	0	0.669009	0	0	0	0	0	0	0	0
ENSG00000064787	6.69249	-0.167418	0.192055	-1.03298	0.301613	0.623357	coding	protein_coding	ENSG00000064787	BCAS1	4.31621	3.22563	12.092	2.30058	6.25276	1.10025	6.02108	1.81435	0	6.98275	5.77942	10.2749	17.7234	13.8058	8.69818
ENSG00000064835	0						coding	protein_coding	ENSG00000064835	POU1F1	0	0	0	0	0	0	0	0	0	0	0	0	0	0	0
ENSG00000064886	0.0724848	0	0.0419558	0	1		coding	protein_coding	ENSG00000064886	CHI3L2	0	0	0	0	0	0	0	0	0	0	0	0	0	0	1.08727
ENSG00000064932	229.888	0.704896	0.217839	3.2189	0.00128683	0.0156725	coding	protein_coding	ENSG00000064932	SBNO2	133.515	153.755	185.41	320.931	343.207	348.78	232.146	220.443	240.57	114.052	421.897	286.841	154.677	86.6002	205.495
ENSG00000064933	51.3415	0.32563	0.225222	1.4327	0.151942	0.440542	coding	protein_coding	ENSG00000064933	PMS1	45.7518	39.7828	47.3603	70.1678	51.4115	79.2182	56.1967	42.6372	22.8278	75.6465	31.7868	67.6431	63.6432	56.4784	19.5709
ENSG00000064961	140.175	0.208267	0.172619	1.20694	0.227454	0.545957	coding	protein_coding	ENSG00000064961	HMG20B	103.013	117.198	126.966	105.827	170.214	130.93	121.76	146.962	168.575	153.621	208.059	140.424	152.26	131.783	125.036
ENSG00000064989	3.68829	0.102021	0.18917	0.532094	0.594661		coding	protein_coding	ENSG00000064989	CALCRL	3.16522	1.07521	2.01533	4.60117	2.08425	3.30076	6.02108	3.6287	3.51197	6.98275	5.77942	5.13745	2.41683	1.25508	4.34909
ENSG00000064995	42.3411	-0.299634	0.199746	-1.50405	0.132569	0.407307	coding	protein_coding	ENSG00000064995	TAF11	45.464	43.0084	55.4216	43.7111	31.9585	33.0076	48.8376	36.287	50.9236	38.4051	28.8971	41.9559	53.1703	35.1421	48.9273
ENSG00000064999	76.3692	-0.262702	0.178278	-1.45578	0.145454	0.429353	coding	protein_coding	ENSG00000064999	ANKS1A	89.4893	102.145	90.6899	78.2199	56.2748	93.5215	84.9641	82.5528	64.9715	54.6982	66.4633	77.0618	64.4488	71.5393	68.4982
ENSG00000065000	540.11	-0.292387	0.0927773	-3.15405	0.00161021	0.0187669	coding	protein_coding	ENSG00000065000	AP3D1	582.4	560.185	554.216	465.868	451.588	458.805	540.559	527.068	510.992	498.103	615.508	547.995	668.656	543.448	576.255
ENSG00000065029	37.324	-0.0282005	0.213447	-0.145354	0.884431	0.966556	coding	protein_coding	ENSG00000065029	ZNF76	43.4498	32.2563	27.207	39.1099	34.7375	28.6066	30.1054	31.7511	45.6556	30.2586	28.8971	50.5183	51.559	47.6929	38.0545
ENSG00000065054	39.4504	-0.0621685	0.211699	-0.312317	0.7548	0.919356	coding	protein_coding	ENSG00000065054	SLC9A3R2	39.9968	33.3315	33.2529	41.4105	33.348	26.4061	32.1124	42.6372	40.3877	39.5689	72.2427	30.8247	43.5029	41.4175	41.3164
ENSG00000065057	27.9493	-0.383996	0.225315	-1.7342	0.0828823	0.30965	coding	protein_coding	ENSG00000065057	NTHL1	27.336	33.3315	37.2836	23.0058	22.9268	12.1028	19.4013	19.9578	38.6317	16.2931	34.6765	31.681	44.3086	21.3363	36.9673
ENSG00000065060	141.973	-0.517081	0.15258	-3.38305	0.000716862	0.00984422	coding	protein_coding	ENSG00000065060	UHRF1BP1	168.044	186.011	164.249	120.781	129.918	89.1205	135.14	138.798	156.283	126.853	112.699	153.267	127.286	165.67	155.48
ENSG00000065135	291.602	0.0775238	0.124772	0.622136	0.533853	0.805739	coding	protein_coding	ENSG00000065135	GNAI3	289.186	246.223	330.514	300.226	281.374	339.978	282.322	309.346	272.178	331.681	254.294	274.854	266.657	296.198	299
ENSG00000065150	964.512	-0.138184	0.0979144	-1.41098	0.15825	0.450833	coding	protein_coding	ENSG00000065150	IPO5	1014.6	975.216	1079.21	976.598	935.134	862.598	954.675	1065.93	999.156	798.362	973.831	1019.78	971.566	839.645	1001.38
ENSG00000065154	208.306	-0.253553	0.126735	-1.99193	0.0463787	0.216836	coding	protein_coding	ENSG00000065154	OAT	243.722	247.298	253.932	194.399	219.541	198.045	170.597	179.62	175.599	205.991	144.485	192.655	223.96	273.606	201.145
ENSG00000065183	170.642	0.132812	0.216741	0.620249	0.535094	0.806623	coding	protein_coding	ENSG00000065183	WDR3	150.492	103.22	158.203	129.983	186.888	159.537	202.041	111.582	273.934	216.465	106.919	264.579	201.403	176.966	117.425
ENSG00000065243	205.432	-0.223462	0.179526	-1.26229	0.206844	0.520885	coding	protein_coding	ENSG00000065243	PKN2	153.369	237.622	169.288	143.787	136.171	178.241	209.4	200.485	135.211	219.957	335.206	343.353	223.96	200.812	194.622
ENSG00000065268	137.655	0.347742	0.139665	2.48938	0.0127968	0.0898175	coding	protein_coding	ENSG00000065268	WDR18	109.344	117.198	120.92	140.336	164.656	144.133	123.767	148.777	135.211	117.543	170.493	146.417	137.759	139.313	148.956
ENSG00000065308	409.071	0.0956084	0.0938517	1.018	0.308676	0.630076	coding	protein_coding	ENSG00000065308	TRAM2	410.903	358.045	391.982	454.365	416.156	382.888	392.708	419.114	407.389	403.836	450.794	419.559	406.833	435.511	385.982
ENSG00000065320	1.97194	0.084704	0.121299	1.21604	0.22397		coding	protein_coding	ENSG00000065320	NTN1	0.575494	0	0	0	4.1685	0	2.00703	0.907174	1.75599	0	2.88971	8.56242	4.02805	2.51015	2.17455
ENSG00000065325	172.021	-0.0708067	0.225948	-0.312384	0.754749	0.919356	coding	protein_coding	ENSG00000065325	GLP2R	198.545	156.981	189.441	231.209	173.688	92.4212	202.041	188.692	156.283	208.319	26.0074	164.399	167.567	240.974	183.749
ENSG00000065328	259.258	-0.592799	0.141164	-4.20296	2.63446e-05	0.000603928	coding	protein_coding	ENSG00000065328	MCM10	269.044	281.705	364.775	170.243	204.257	196.945	258.237	250.38	307.298	232.758	196.5	285.129	285.186	287.412	299
ENSG00000065357	59.0995	0.103598	0.223392	0.463858	0.64275	0.868467	coding	protein_coding	ENSG00000065357	DGKA	59.2759	39.7828	62.4752	65.5666	52.8011	66.0152	64.2248	42.6372	22.8278	34.9138	101.14	103.605	54.7815	57.7335	58.7127
ENSG00000065361	10.3111	-0.363244	0.149895	-1.68217	0.092535	0.331702	coding	protein_coding	ENSG00000065361	ERBB3	6.61818	20.429	64.4906	0	12.5055	9.90227	0.669009	0.907174	17.5599	3.49138	2.88971	7.70618	0.80561	1.25508	5.43636
ENSG00000065371	0						coding	protein_coding	ENSG00000065371	ROPN1	0	0	0	0	0	0	0	0	0	0	0	0	0	0	0
ENSG00000065413	31.3575	-0.117749	0.206699	-0.582899	0.559962	0.822183	coding	protein_coding	ENSG00000065413	ANKRD44	37.6949	39.7828	25.1916	14.9538	45.1588	16.5038	26.0913	45.3587	14.0479	94.2672	8.66912	23.1185	44.3086	11.2957	23.92
ENSG00000065427	639.418	0.0183612	0.0808624	0.227077	0.820364	0.945464	coding	protein_coding	ENSG00000065427	KARS	638.799	594.592	666.067	646.464	646.118	633.745	576.016	648.629	656.739	615.646	690.64	640.469	631.598	617.497	688.244
ENSG00000065457	159.701	0.0441519	0.154977	0.285834	0.775005	0.926828	coding	protein_coding	ENSG00000065457	ADAT1	186.748	116.123	171.303	154.139	168.824	174.94	156.548	147.869	117.651	162.931	176.272	176.386	178.845	156.884	150.044
ENSG00000065485	106.66	0.28643	0.217353	1.32063	0.186624	0.49076	coding	protein_coding	ENSG00000065485	PDIA5	126.896	73.1143	52.3986	89.7228	159.098	100.123	123.098	118.84	131.699	119.871	69.353	72.7806	162.733	90.3654	109.815
ENSG00000065491	43.2033	-0.325682	0.193792	-1.67128	0.094667	0.335767	coding	protein_coding	ENSG00000065491	TBC1D22B	46.9028	53.7605	53.4062	42.5608	36.8218	34.1078	43.4856	58.0591	38.6317	45.3879	34.6765	30.8247	41.0861	42.6726	45.6655
ENSG00000065518	506.827	0.238816	0.0985793	2.42286	0.0153987	0.102272	coding	protein_coding	ENSG00000065518	NDUFB4	427.017	468.792	484.687	620.007	506.473	512.718	545.242	523.439	507.48	459.698	508.589	461.515	526.869	566.039	483.836
ENSG00000065526	868.583	-0.119617	0.120403	-0.995801	0.319347	0.640995	coding	protein_coding	ENSG00000065526	SPEN	934.315	737.595	811.17	829.361	739.215	709.663	828.902	850.929	853.409	914.741	1020.07	757.774	1063.41	857.216	1120.98
ENSG00000065534	223.978	-0.139492	0.210855	-0.664842	0.506151	0.787168	coding	protein_coding	ENSG00000065534	MYLK	178.979	178.485	334.545	205.902	145.203	248.657	198.696	166.92	142.235	342.155	303.419	184.092	165.15	251.015	314.222
ENSG00000065548	214.641	0.029524	0.145783	0.200879	0.840793	0.952092	coding	protein_coding	ENSG00000065548	ZC3H15	182.144	194.613	238.817	210.503	225.099	188.143	218.097	223.165	237.058	290.948	190.721	213.204	212.681	176.966	217.455
ENSG00000065559	288.078	0.0326622	0.137501	0.238454	0.811529	0.942555	coding	protein_coding	ENSG00000065559	MAP2K4	262.138	324.714	291.215	360.041	302.217	233.254	266.265	254.916	266.91	286.293	329.427	307.391	271.491	248.505	316.396
ENSG00000065600	39.0219	-0.0808876	0.211936	-0.354549	0.722928	0.905083	coding	protein_coding	ENSG00000065600	TMEM206	47.766	39.7828	60.4599	42.5608	55.5801	37.4086	28.7674	38.1013	24.5838	20.9483	43.3456	45.3808	34.6412	30.1218	35.88
ENSG00000065609	0.713611	-0.0684915	0.0551741	-0.828498	0.407388		coding	protein_coding	ENSG00000065609	SNAP91	0	6.45126	2.01533	1.15029	0	0	0	0	0	0	0	0	0	0	1.08727
ENSG00000065613	548.2	-0.375298	0.176926	-2.13212	0.0329967	0.173535	coding	protein_coding	ENSG00000065613	SLK	406.587	725.767	588.476	337.036	361.27	544.625	599.432	519.811	651.471	719.224	566.383	629.338	630.793	497.01	445.782
ENSG00000065615	85.1456	-0.24447	0.218254	-1.12329	0.261316	0.581644	coding	protein_coding	ENSG00000065615	CYB5R4	73.0878	73.1143	141.073	75.9193	56.2748	86.92	101.02	172.363	63.2155	74.4827	86.6912	59.937	69.2825	75.3045	68.4982
ENSG00000065618	9.64046	0.333421	0.148434	2.50222	0.0123417	0.0874875	coding	protein_coding	ENSG00000065618	COL17A1	3.16522	3.22563	0	1.15029	31.9585	26.4061	2.00703	31.7511	1.75599	26.7672	5.77942	3.42497	1.61122	1.25508	4.34909
ENSG00000065621	4.18457	-0.064372	0.166021	-0.376017	0.706904		coding	protein_coding	ENSG00000065621	GSTO2	5.46719	1.07521	8.06132	3.45088	3.47375	4.40101	3.34504	2.72152	12.2919	2.32758	0	5.13745	7.25049	3.76523	0
ENSG00000065665	45.2236	-0.256842	0.206906	-1.24205	0.214217	0.530061	coding	protein_coding	ENSG00000065665	SEC61A2	47.1905	40.858	66.5059	43.7111	32.6533	44.0101	44.8236	48.0802	35.1197	38.4051	43.3456	55.6557	44.3086	33.887	59.8
ENSG00000065675	20.0341	-0.141786	0.225724	-0.634541	0.525728	0.802338	coding	protein_coding	ENSG00000065675	PRKCQ	18.4158	24.7298	21.161	18.4047	13.895	20.9048	18.7322	21.7722	31.6078	11.6379	26.0074	22.2623	20.9459	21.3363	8.69818
ENSG00000065717	19.3094	-0.00636074	0.226275	-0.0266669	0.978725	0.995653	coding	protein_coding	ENSG00000065717	TLE2	17.5526	21.5042	20.1533	9.20234	25.7058	22.0051	24.7533	15.422	26.3398	11.6379	23.1177	17.1248	24.1683	20.0812	10.8727
ENSG00000065802	105.638	0.698	0.160337	4.35669	1.32046e-05	0.000328106	coding	protein_coding	ENSG00000065802	ASB1	65.3186	76.34	90.6899	129.983	141.034	129.83	127.781	128.819	126.431	81.4655	69.353	101.037	97.4788	125.508	93.5055
ENSG00000065809	1856.85	0.793682	0.0895127	8.86571	7.60182e-19	1.56586e-16	coding	protein_coding	ENSG00000065809	FAM107B	1442.76	1368.74	1265.63	2337.39	2512.91	2394.15	1910.69	1875.13	1610.24	2097.15	2450.47	1941.96	1537.1	1496.05	1612.43
ENSG00000065833	393.062	-0.137385	0.0999514	-1.37135	0.170267	0.467452	coding	protein_coding	ENSG00000065833	ME1	429.894	417.182	457.48	398.001	415.461	363.083	317.779	363.777	335.393	422.457	384.331	421.271	385.082	347.656	437.084
ENSG00000065882	176.496	0.171556	0.186515	0.919525	0.357821	0.676312	coding	protein_coding	ENSG00000065882	TBC1D1	167.181	186.011	145.104	150.688	202.867	225.552	197.358	136.076	100.091	218.793	158.934	216.629	222.348	155.629	164.178
ENSG00000065883	361.302	-0.0969557	0.122492	-0.790709	0.429114	0.732846	coding	protein_coding	ENSG00000065883	CDK13	372.632	379.549	397.02	372.695	358.491	335.577	358.589	373.756	324.857	372.414	291.86	362.19	452.753	346.401	320.745
ENSG00000065911	242.713	-0.343774	0.129684	-2.64839	0.00808766	0.0645531	coding	protein_coding	ENSG00000065911	MTHFD2	250.915	291.382	302.3	226.608	203.562	216.75	221.442	283.945	249.35	218.793	277.412	220.911	237.655	198.302	241.375
ENSG00000065923	228.804	0.0077409	0.186843	0.0432847	0.965475	0.992715	coding	protein_coding	ENSG00000065923	SLC9A7	302.134	227.945	192.464	209.353	244.552	278.364	301.054	196.857	247.594	202.5	109.809	234.61	256.184	213.363	215.28
ENSG00000065970	161.366	-0.124282	0.127944	-0.967485	0.333301	0.654392	coding	protein_coding	ENSG00000065970	FOXJ2	175.813	150.529	195.487	158.74	157.014	160.637	173.273	160.57	179.111	164.095	132.927	129.293	165.956	159.395	157.655
ENSG00000065978	4002.97	0.277884	0.0608553	4.56638	4.96218e-06	0.000140214	coding	protein_coding	ENSG00000065978	YBX1	3602.31	3608.41	3857.34	4517.2	4565.21	4375.7	4010.71	3801.06	4163.44	3664.78	4057.15	3961.83	3714.67	4001.18	4143.6
ENSG00000065989	26.095	-0.284114	0.214651	-1.31439	0.188715	0.493325	coding	protein_coding	ENSG00000065989	PDE4A	29.9257	27.9555	32.2453	16.1041	22.9268	27.5063	24.7533	26.308	36.8757	22.1121	23.1177	17.9811	24.9739	23.8464	34.7927
ENSG00000066027	83.1053	-0.352682	0.175098	-2.00659	0.0447929	0.212781	coding	protein_coding	ENSG00000066027	PPP2R5A	93.5178	75.2647	125.958	80.5204	70.8646	67.1154	83.6261	94.3461	79.0194	53.5345	69.353	74.4931	94.2564	96.6408	88.0691
ENSG00000066032	0.834464	-0.00238071	0.0582877	-0.0949125	0.924384		coding	protein_coding	ENSG00000066032	CTNNA2	0.287747	0	0	0	0	0	0.669009	0	0	0	0	0	10.4729	0	1.08727
ENSG00000066044	426.63	-0.0182901	0.101348	-0.179593	0.857472	0.957816	coding	protein_coding	ENSG00000066044	ELAVL1	406.874	441.912	467.557	410.654	439.777	440.101	435.525	437.258	442.509	351.465	465.243	389.59	401.999	400.369	468.615
ENSG00000066056	6.31083	0.180198	0.210597	0.854884	0.392615	0.703462	coding	protein_coding	ENSG00000066056	TIE1	5.46719	4.30084	5.03833	10.3526	7.64226	4.40101	6.69009	9.97891	8.77993	11.6379	5.77942	3.42497	3.22244	2.51015	5.43636
ENSG00000066084	317.517	0.145992	0.137629	1.06053	0.288904	0.611222	coding	protein_coding	ENSG00000066084	DIP2B	353.353	246.223	303.307	320.931	355.712	342.179	367.286	304.81	307.298	292.112	309.199	394.728	303.715	274.861	287.04
ENSG00000066117	261.966	-0.125023	0.152548	-0.820842	0.411736	0.720336	coding	protein_coding	ENSG00000066117	SMARCD1	285.733	277.404	240.832	196.7	221.625	312.472	234.822	269.431	328.369	242.069	202.28	252.591	289.214	266.076	309.873
ENSG00000066135	135.936	-0.22699	0.211102	-1.06731	0.285833	0.607893	coding	protein_coding	ENSG00000066135	KDM4A	168.908	203.215	108.828	97.7748	147.287	136.431	139.154	106.139	86.0433	176.896	92.4706	151.555	188.513	145.589	90.2436
ENSG00000066136	117.023	0.00791179	0.199082	0.0449634	0.964136	0.992405	coding	protein_coding	ENSG00000066136	NFYC	132.939	118.273	137.042	156.44	112.55	124.329	93.6612	121.561	50.9236	125.69	130.037	69.3556	120.036	125.508	136.996
ENSG00000066185	1.81845	-0.0340707	0.110252	-0.528999	0.596806		coding	protein_coding	ENSG00000066185	ZMYND12	1.15099	2.15042	1.00767	1.15029	0	1.10025	0.669009	2.72152	0	1.16379	0	0.856242	15.3066	0	0
ENSG00000066230	0.0724848	0	0.0419558	0	1		coding	protein_coding	ENSG00000066230	SLC9A3	0	0	0	0	0	0	0	0	0	0	0	0	0	0	1.08727
ENSG00000066248	40.3784	0.585112	0.225185	2.66832	0.00762316	0.0621261	coding	protein_coding	ENSG00000066248	NGEF	16.4016	34.4067	16.1226	64.4164	29.8743	73.7169	28.0984	46.2659	112.383	25.6034	40.4559	31.681	21.7515	35.1421	29.3564
ENSG00000066279	409.704	0.0526466	0.208871	0.25448	0.799125	0.937899	coding	protein_coding	ENSG00000066279	ASPM	237.104	480.619	329.506	274.92	330.701	495.114	351.899	320.232	593.523	655.215	401.669	514.602	494.645	368.992	296.825
ENSG00000066294	0.362182	-0.00251706	0.0557093	-0.0480128	0.961706		coding	protein_coding	ENSG00000066294	CD84	0.863241	0	0	0	0.694751	0	0	0.907174	0	0	0	1.71248	0	1.25508	0
ENSG00000066322	309.387	-0.0303521	0.105424	-0.286313	0.774639	0.926828	coding	protein_coding	ENSG00000066322	ELOVL1	326.593	342.992	296.254	304.827	324.449	314.672	315.103	305.718	263.398	345.646	274.522	283.416	322.244	310.004	310.96
ENSG00000066336	0.265538	-0.00274757	0.0420154	-0.0700218	0.944176		coding	protein_coding	ENSG00000066336	SPI1	0.287747	0	0	0	0	0	0	0	0	0	2.88971	0	0.80561	0	0
ENSG00000066379	30.8218	0.308113	0.215011	1.43734	0.15062	0.438357	coding	protein_coding	ENSG00000066379	ZNRD1	22.4443	19.3538	29.2223	28.7573	37.5165	30.8071	24.0843	23.5865	38.6317	29.0948	43.3456	41.9559	28.1964	25.1015	40.2291
ENSG00000066382	0.0671777	-0.00547692	0.0419576	-0.164204	0.86957		coding	protein_coding	ENSG00000066382	MPPED2	0	0	1.00767	0	0	0	0	0	0	0	0	0	0	0	0
ENSG00000066405	0						coding	protein_coding	ENSG00000066405	CLDN18	0	0	0	0	0	0	0	0	0	0	0	0	0	0	0
ENSG00000066422	182.498	0.142449	0.124597	1.14673	0.251494	0.570984	coding	protein_coding	ENSG00000066422	ZBTB11	176.101	176.335	195.487	208.203	200.088	200.246	159.224	142.426	159.795	216.465	182.052	169.536	183.679	205.832	162.004
ENSG00000066427	84.0588	-0.145648	0.211797	-0.683493	0.494296	0.779563	coding	protein_coding	ENSG00000066427	ATXN3	74.2387	129.025	79.6055	78.2199	71.5593	92.4212	115.069	141.519	59.7035	57.0258	78.0221	56.512	78.1442	55.2233	94.5927
ENSG00000066455	210.413	0.0101165	0.137746	0.0723797	0.9423	0.987168	coding	protein_coding	ENSG00000066455	GOLGA5	183.295	203.215	227.732	185.197	197.309	232.153	194.013	178.713	198.426	257.198	277.412	226.048	162.733	219.638	213.105
ENSG00000066468	13.1635	-0.168571	0.220153	-0.769366	0.441676	0.741851	coding	protein_coding	ENSG00000066468	FGFR2	14.3874	19.3538	10.0767	9.20234	4.1685	19.8045	9.36612	9.97891	8.77993	27.931	26.0074	11.1311	8.86171	7.53045	10.8727
ENSG00000066557	65.8155	-0.435929	0.169989	-2.54839	0.0108222	0.0799876	coding	protein_coding	ENSG00000066557	LRRC40	81.4324	83.8664	74.5672	60.9655	58.3591	47.3109	61.5488	67.1309	50.9236	69.8275	66.4633	51.3745	72.5049	70.2842	70.6727
ENSG00000066583	47.3858	-0.36465	0.20482	-1.7947	0.0727021	0.286395	coding	protein_coding	ENSG00000066583	ISOC1	46.3273	54.8357	58.4446	26.4567	36.127	47.3109	46.8306	37.1941	63.2155	41.8965	31.7868	44.5246	45.9198	69.0291	60.8873
ENSG00000066629	268.946	-0.584969	0.157337	-3.71097	0.00020647	0.00345649	coding	protein_coding	ENSG00000066629	EML1	359.108	290.307	385.936	179.446	227.878	238.755	282.322	302.996	170.331	261.853	262.963	238.892	284.38	276.117	272.905
ENSG00000066651	63.3596	-0.106329	0.225183	-0.466925	0.640554	0.867843	coding	protein_coding	ENSG00000066651	TRMT11	65.8941	66.6631	78.5979	56.3643	36.127	93.5215	38.8025	94.3461	31.6078	41.8965	69.353	66.7869	64.4488	91.6205	54.3636
ENSG00000066654	259.862	-0.180223	0.14985	-1.2011	0.229712	0.548466	coding	protein_coding	ENSG00000066654	THUMPD1	282.28	302.134	267.031	255.365	267.479	213.449	260.244	222.258	214.23	271.164	286.081	258.585	232.016	351.421	214.193
ENSG00000066697	311.623	0.550269	0.104579	5.26205	1.42461e-07	5.81838e-06	coding	protein_coding	ENSG00000066697	MSANTD3	250.915	259.126	271.062	402.602	377.25	387.289	312.427	276.688	330.125	347.974	286.081	308.247	263.435	283.647	317.484
ENSG00000066735	24.8802	-0.208168	0.215431	-0.955202	0.339475	0.659869	coding	protein_coding	ENSG00000066735	KIF26A	26.185	22.5794	38.2913	24.1561	25.7058	18.7043	25.4223	30.8439	21.0718	25.6034	20.228	23.9748	21.7515	22.5914	26.0945
ENSG00000066739	226.202	0.0393144	0.19687	0.200615	0.841	0.952137	coding	protein_coding	ENSG00000066739	ATG2B	286.308	220.418	171.303	355.44	164.656	190.344	189.329	161.477	182.623	337.5	335.206	232.898	180.457	204.577	180.487
ENSG00000066777	390.006	-0.474171	0.108635	-4.36792	1.25436e-05	0.000313324	coding	protein_coding	ENSG00000066777	ARFGEF1	422.988	479.544	404.074	340.486	297.353	281.665	431.511	392.806	430.217	417.801	378.552	357.053	445.502	371.502	399.029
ENSG00000066813	1.62176	0.0173651	0.0708945	0.833127	0.404773		coding	protein_coding	ENSG00000066813	ACSM2B	0	0	0	0	2.08425	0	0	3.6287	5.26796	0	0	7.70618	5.63927	0	0
ENSG00000066827	62.6704	-0.0523522	0.226006	-0.22999	0.818099	0.94476	coding	protein_coding	ENSG00000066827	ZFAT	85.1731	47.3093	64.4906	56.3643	36.127	92.4212	74.26	64.4094	33.3637	107.069	52.0147	33.3934	41.0861	51.4581	101.116
ENSG00000066855	163.042	-0.394788	0.163498	-2.40727	0.0160725	0.105466	coding	protein_coding	ENSG00000066855	MTFR1	200.272	180.635	205.564	144.937	171.603	105.624	136.478	167.827	154.527	137.328	213.838	169.536	170.789	135.548	151.131
ENSG00000066923	21.6573	-0.0051028	0.224516	-0.0212941	0.983011	0.996295	coding	protein_coding	ENSG00000066923	STAG3	23.883	19.3538	22.1686	25.3064	18.0635	23.1053	29.4364	25.4009	10.5359	16.2931	23.1177	22.2623	19.3346	31.3769	15.2218
ENSG00000066926	239.308	-0.0348917	0.194651	-0.180241	0.856963	0.957624	coding	protein_coding	ENSG00000066926	FECH	287.747	188.162	234.786	178.295	227.183	286.066	227.463	249.473	266.91	229.267	144.485	333.934	302.104	210.853	222.891
ENSG00000066933	446.21	-0.174052	0.20683	-0.840574	0.400587	0.709564	coding	protein_coding	ENSG00000066933	MYO9A	382.128	501.048	597.545	379.596	386.281	479.71	462.285	405.507	324.857	593.534	291.86	526.589	702.492	363.972	295.738
ENSG00000067048	484.144	0.0882685	0.126172	0.701058	0.483267	0.770895	coding	protein_coding	ENSG00000067048	DDX3Y	472.193	563.41	515.925	607.354	571.085	474.209	408.764	400.064	454.8	478.319	395.89	507.752	408.444	555.998	447.956
ENSG00000067057	2137.51	0.389717	0.0598463	6.51192	7.41948e-11	5.79412e-09	coding	protein_coding	ENSG00000067057	PFKP	1885.03	1791.3	1874.26	2431.72	2418.43	2466.77	2062.55	2194.45	2130.01	2212.37	2534.27	2198.83	1910.1	1921.52	2031.03
ENSG00000067064	183.418	-0.109224	0.152171	-0.707448	0.479288	0.767702	coding	protein_coding	ENSG00000067064	IDI1	201.423	227.945	256.955	201.301	227.183	195.845	143.168	171.456	128.187	162.931	164.713	171.248	158.705	129.273	210.931
ENSG00000067066	90.4501	0.368663	0.180411	2.04326	0.0410268	0.200643	coding	protein_coding	ENSG00000067066	SP100	76.253	62.3622	68.5212	119.63	82.6753	88.0202	88.3091	137.89	98.3352	97.7586	86.6912	107.887	82.9778	70.2842	89.1564
ENSG00000067082	741.194	0.023164	0.147249	0.158811	0.873817	0.962832	coding	protein_coding	ENSG00000067082	KLF6	917.338	841.89	739.626	942.089	809.385	798.783	878.408	723.018	491.676	683.146	632.846	528.301	725.855	705.352	700.204
ENSG00000067113	76.5587	0.222298	0.183494	1.21352	0.224933	0.54398	coding	protein_coding	ENSG00000067113	PPAP2A	76.8285	56.9862	81.6209	103.526	72.2541	90.2207	73.591	68.0381	80.7754	65.1724	75.1324	74.4931	64.4488	65.2639	100.029
ENSG00000067141	664.232	-0.45002	0.128152	-3.51262	0.000443719	0.00662455	coding	protein_coding	ENSG00000067141	NEO1	762.242	762.324	735.596	623.458	589.149	390.59	669.009	588.756	582.987	649.396	661.743	589.951	723.438	801.993	832.851
ENSG00000067167	4074.19	-0.119578	0.0627738	-1.9046	0.056832	0.245931	coding	protein_coding	ENSG00000067167	TRAM1	4490.58	4198.7	4412.57	3850.03	4178.23	4012.62	3441.38	3890.87	3664.74	4133.79	4039.81	3808.57	4522.7	4127.94	4340.39
ENSG00000067177	273.475	-0.164787	0.106674	-1.54198	0.123079	0.390831	coding	protein_coding	ENSG00000067177	PHKA1	286.021	309.661	304.315	259.966	277.9	253.058	287.674	283.038	254.618	254.871	271.633	242.317	239.266	279.882	297.913
ENSG00000067182	688.15	-0.540519	0.0917984	-5.88468	3.98837e-09	2.25843e-07	coding	protein_coding	ENSG00000067182	TNFRSF1A	821.806	881.673	853.492	639.562	561.359	527.021	638.903	693.081	714.686	617.974	554.824	611.357	675.907	721.668	808.931
ENSG00000067191	32.3561	0.111495	0.22629	0.483729	0.628578	0.862284	coding	protein_coding	ENSG00000067191	CACNB1	38.8459	23.6546	31.2376	21.8555	61.1381	25.3058	40.1405	60.7807	56.1916	31.4224	17.3382	49.6621	8.86171	11.2957	7.61091
ENSG00000067208	122.764	0.430159	0.189776	2.25771	0.0239639	0.139951	coding	protein_coding	ENSG00000067208	EVI5	134.953	94.6185	103.79	212.804	122.276	162.837	141.161	90.7174	101.847	131.509	106.919	120.73	99.8957	89.1103	128.298
ENSG00000067221	22.7579	0.00516632	0.226287	0.0198367	0.984174	0.996295	coding	protein_coding	ENSG00000067221	STOML1	18.1281	26.8803	19.1456	19.555	18.0635	26.4061	16.7252	14.5148	22.8278	18.6207	43.3456	13.6999	16.1122	40.1624	27.1818
ENSG00000067225	12312.3	0.301384	0.0425259	7.08707	1.36982e-12	1.40158e-10	coding	protein_coding	ENSG00000067225	PKM	10507.9	11133.8	10978.5	13865.6	13342.7	13044.6	12613.5	13109.6	13570.3	11756.6	12061.6	11842.7	12157.5	12234.5	12464.5
ENSG00000067248	314.805	-0.362225	0.124078	-2.91907	0.00351072	0.0348937	coding	protein_coding	ENSG00000067248	DHX29	325.442	388.151	368.805	270.319	223.71	330.076	276.301	292.11	309.054	317.715	332.316	321.947	306.937	327.575	331.618
ENSG00000067334	250.74	-0.268015	0.155614	-1.73052	0.0835366	0.310976	coding	protein_coding	ENSG00000067334	DNTTIP2	272.784	255.9	225.717	184.047	179.94	247.557	282.322	192.321	270.422	310.733	309.199	283.416	256.184	286.157	204.407
ENSG00000067365	63.6124	0.243488	0.209618	1.16175	0.245336	0.564749	coding	protein_coding	ENSG00000067365	METTL22	62.7289	54.8357	37.2836	66.7169	52.1063	83.6192	41.4785	50.8017	50.9236	97.7586	69.353	55.6557	68.4769	60.2436	102.204
ENSG00000067369	233.26	-0.476288	0.220598	-2.14337	0.0320831	0.170148	coding	protein_coding	ENSG00000067369	TP53BP1	333.211	282.78	319.43	300.226	133.392	115.527	227.463	132.447	136.967	160.603	427.677	196.079	221.543	272.351	239.2
ENSG00000067445	0.521644	-0.0319574	0.0586963	-0.60939	0.542266		coding	protein_coding	ENSG00000067445	TRO	0.287747	0	2.01533	0	0	0	0	3.6287	0	0	0	0	0.80561	0	1.08727
ENSG00000067533	178.269	-0.552127	0.202192	-2.72811	0.0063698	0.0546373	coding	protein_coding	ENSG00000067533	RRP15	221.278	246.223	218.663	93.1737	157.708	151.835	137.816	223.165	261.642	211.81	112.699	161.83	179.651	111.702	184.836
ENSG00000067560	1532.58	0.148577	0.0718874	2.06666	0.0387658	0.193598	coding	protein_coding	ENSG00000067560	RHOA	1430.97	1406.38	1469.18	1659.87	1658.37	1464.44	1463.79	1561.25	1606.73	1422.15	1595.12	1516.41	1475.88	1624.07	1634.17
ENSG00000067596	304.736	-0.501644	0.178861	-2.78332	0.00538064	0.0481884	coding	protein_coding	ENSG00000067596	DHX8	449.749	325.789	509.879	293.324	311.248	233.254	293.695	378.292	261.642	242.069	234.066	212.348	372.192	244.74	208.756
ENSG00000067601	17.8904	-0.317867	0.225562	-1.41387	0.157399	0.448858	pseudo	pseudogene	ENSG00000067601	PMS2P4	21.8688	17.2034	23.1763	14.9538	15.9793	9.90227	18.0632	14.5148	28.0958	20.9483	14.4485	10.2749	20.9459	23.8464	14.1345
ENSG00000067606	31.3858	-0.0255212	0.22619	-0.0999949	0.920348	0.978451	coding	protein_coding	ENSG00000067606	PRKCZ	36.2561	26.8803	44.3373	34.5088	34.7375	35.2081	32.7814	25.4009	21.0718	17.4569	49.125	17.9811	47.531	13.8058	33.7055
ENSG00000067646	66.8178	0.122909	0.223365	0.5472	0.584241	0.83703	coding	protein_coding	ENSG00000067646	ZFY	61.2901	52.6853	75.5749	46.0117	108.381	62.7144	42.1475	42.6372	42.1437	136.164	60.6839	54.7995	51.559	99.1509	66.3236
ENSG00000067704	862.599	-0.130198	0.06744	-1.92951	0.0536674	0.23874	coding	protein_coding	ENSG00000067704	IARS2	915.036	921.456	933.098	820.158	891.365	804.285	824.219	791.963	809.51	921.724	881.361	845.967	822.528	864.747	891.564
ENSG00000067715	166.578	0.319424	0.152937	2.09022	0.0365979	0.186306	coding	protein_coding	ENSG00000067715	SYT1	126.896	163.432	151.15	205.902	182.025	176.04	202.041	166.92	133.455	171.077	121.368	168.68	185.29	160.65	183.749
ENSG00000067798	555.094	1.3083	0.149041	8.76929	1.79799e-18	3.65068e-16	coding	protein_coding	ENSG00000067798	NAV3	303.573	273.104	368.805	805.204	826.059	1028.74	570.664	539.769	518.016	661.034	638.625	672.15	368.164	480.694	271.818
ENSG00000067829	205.643	0.0153269	0.134579	0.114958	0.908479	0.974433	coding	protein_coding	ENSG00000067829	IDH3G	204.588	184.936	233.778	209.353	209.815	211.248	208.731	215	237.058	196.681	184.941	197.792	157.9	195.792	237.025
ENSG00000067836	31.4728	-0.379856	0.225589	-1.67186	0.0945528	0.335507	coding	protein_coding	ENSG00000067836	ROGDI	29.6379	29.0307	67.5136	23.0058	19.453	28.6066	23.4153	25.4009	24.5838	26.7672	34.6765	21.4061	24.9739	74.0494	19.5709
ENSG00000067840	27.3312	-0.0584803	0.212392	-0.28802	0.773331	0.926809	coding	protein_coding	ENSG00000067840	PDZD4	11.5099	55.911	13.0996	39.1099	13.2003	17.604	38.1335	37.1941	47.4116	10.4741	49.125	11.9874	18.529	23.8464	22.8327
ENSG00000067842	0.0733502	0.0111095	0.0419558	0.30069	0.763651		coding	protein_coding	ENSG00000067842	ATP2B3	0	0	0	0	0	1.10025	0	0	0	0	0	0	0	0	0
ENSG00000067900	298.976	-0.00446221	0.183872	-0.0258	0.979417	0.995653	coding	protein_coding	ENSG00000067900	ROCK1	212.07	370.948	251.916	318.631	237.605	271.762	297.04	312.068	365.245	345.646	332.316	291.122	403.611	248.505	226.153
ENSG00000067955	264.397	0.438926	0.131082	3.34798	0.000814041	0.0109357	coding	protein_coding	ENSG00000067955	CBFB	245.161	224.719	209.594	343.937	293.185	321.274	215.421	273.967	286.226	281.638	320.758	238.035	257.795	225.914	228.327
ENSG00000067992	59.7265	-0.148605	0.183349	-0.798542	0.424556	0.729445	coding	protein_coding	ENSG00000067992	PDK3	63.5921	65.5879	75.5749	56.3643	65.3066	56.1129	37.4645	57.152	47.4116	58.1896	69.353	69.3556	69.2825	46.4378	58.7127
ENSG00000068001	59.1963	-0.208359	0.224992	-0.899421	0.368428	0.685402	coding	protein_coding	ENSG00000068001	HYAL2	62.7289	78.4904	87.6669	33.3585	36.8218	107.825	40.1405	66.2237	63.2155	50.0431	31.7868	56.512	74.9217	51.4581	46.7527
ENSG00000068024	138.898	-0.114329	0.222813	-0.508037	0.611428	0.8536	coding	protein_coding	ENSG00000068024	HDAC4	165.455	147.304	152.157	195.55	142.424	69.3159	122.429	240.401	122.919	84.9568	83.8015	183.236	158.705	94.1306	120.687
ENSG00000068028	30.4087	0.12043	0.211765	0.572663	0.566873	0.826355	coding	protein_coding	ENSG00000068028	RASSF1	31.9399	29.0307	29.2223	26.4567	38.2113	37.4086	30.7744	32.6583	26.3398	17.4569	34.6765	29.9685	37.8637	22.5914	31.5309
ENSG00000068078	13.624	-0.16099	0.225406	-0.874674	0.381751	0.69585	coding	protein_coding	ENSG00000068078	FGFR3	11.2221	8.60169	11.0843	8.05204	5.55801	9.90227	14.0492	7.25739	10.5359	10.4741	23.1177	8.56242	26.5851	27.6117	21.7455
ENSG00000068079	11.0172	-0.109234	0.221062	-0.436465	0.662499	0.8791	coding	protein_coding	ENSG00000068079	IFI35	11.7976	22.5794	12.092	13.8035	17.3688	6.60152	4.68306	9.07174	7.02395	6.98275	11.5588	10.2749	9.66732	16.316	5.43636
ENSG00000068097	130.033	-0.391658	0.215692	-1.85652	0.0633794	0.264013	coding	protein_coding	ENSG00000068097	HEATR6	101.575	149.454	162.234	90.8731	51.4115	127.629	182.639	135.169	124.675	138.491	236.956	105.318	111.174	131.783	101.116
ENSG00000068120	223.089	0.204173	0.170713	1.19556	0.231869	0.550965	coding	protein_coding	ENSG00000068120	COASY	212.07	237.622	206.571	278.371	246.636	253.058	176.618	189.599	295.006	228.103	199.39	142.136	203.819	268.586	208.756
ENSG00000068137	35.7689	-0.15538	0.226184	-0.682568	0.49488	0.779879	coding	protein_coding	ENSG00000068137	PLEKHH3	27.9115	43.0084	49.3756	49.4626	23.6215	24.2056	34.7885	60.7807	50.9236	17.4569	28.8971	11.1311	27.3907	28.8667	58.7127
ENSG00000068305	194.167	0.435257	0.198511	2.20132	0.0277134	0.154892	coding	protein_coding	ENSG00000068305	MEF2A	125.458	194.613	132.004	222.006	185.498	270.662	204.048	214.093	210.718	244.396	121.368	261.154	199.791	207.087	119.6
ENSG00000068308	225.635	0.048944	0.110215	0.444045	0.65701	0.876073	coding	protein_coding	ENSG00000068308	OTUD5	241.708	213.967	202.541	222.006	245.247	221.151	235.491	248.566	244.082	236.25	234.066	237.179	194.958	192.026	215.28
ENSG00000068323	296.106	0.143597	0.122826	1.17071	0.241717	0.561819	coding	protein_coding	ENSG00000068323	TFE3	287.747	326.864	269.047	371.544	305.69	308.071	304.399	305.718	265.154	272.327	234.066	321.091	284.38	272.351	313.135
ENSG00000068354	44.1147	0.191246	0.224292	0.850295	0.395161	0.705375	coding	protein_coding	ENSG00000068354	TBC1D25	43.7376	29.0307	45.3449	72.4684	53.4958	24.2056	45.4926	57.152	40.3877	44.2241	46.2353	63.3619	37.8637	16.316	42.4036
ENSG00000068366	533.267	0.777293	0.109293	7.10807	1.17676e-12	1.22082e-10	coding	protein_coding	ENSG00000068366	ACSL4	447.159	383.85	393.997	767.245	758.668	661.252	556.615	478.081	493.432	610.991	557.714	496.621	513.174	451.827	428.385
ENSG00000068383	146.389	0.127303	0.139305	0.910878	0.36236	0.680256	coding	protein_coding	ENSG00000068383	INPP5A	120.566	137.627	143.088	148.388	163.961	122.128	175.949	173.27	161.551	144.31	115.588	154.124	145.01	138.058	152.218
ENSG00000068394	76.1193	-0.170842	0.162185	-1.05959	0.289332	0.611765	coding	protein_coding	ENSG00000068394	GPKOW	83.4467	69.8887	77.5902	70.1678	68.0856	64.9149	82.2881	76.2026	101.847	62.8448	78.0221	77.0618	74.9217	74.0494	80.4582
ENSG00000068400	130.167	-0.440405	0.202445	-2.18932	0.0285734	0.157893	coding	protein_coding	ENSG00000068400	GRIPAP1	189.913	89.2425	159.211	98.9251	91.7071	99.0227	133.802	87.0887	122.919	189.698	141.596	116.449	165.15	156.884	110.902
ENSG00000068438	163.661	0.21148	0.169684	1.24597	0.212776	0.528519	coding	protein_coding	ENSG00000068438	FTSJ1	155.383	127.95	176.341	182.896	207.036	157.336	161.231	195.042	128.187	152.457	205.169	146.417	175.623	163.16	120.687
ENSG00000068489	512.417	-0.215155	0.160163	-1.3444	0.178819	0.479902	coding	protein_coding	ENSG00000068489	PRR11	660.955	446.212	513.909	499.227	471.041	396.091	490.383	459.937	556.648	423.62	540.375	700.406	462.42	589.885	475.138
ENSG00000068615	10.5531	-0.425955	0.184801	-2.24377	0.0248474	0.143552	coding	protein_coding	ENSG00000068615	REEP1	7.48142	5.37605	48.3679	9.20234	2.779	3.30076	7.3591	6.35022	24.5838	6.98275	2.88971	7.70618	11.2785	3.76523	10.8727
ENSG00000068650	230.575	-0.480994	0.214139	-2.24565	0.0247264	0.143093	coding	protein_coding	ENSG00000068650	ATP11A	248.038	245.148	381.905	154.139	170.214	203.547	212.076	236.772	193.158	217.629	158.934	161.83	229.599	494.5	151.131
ENSG00000068654	580.751	-0.14975	0.182665	-0.819204	0.41267	0.721348	coding	protein_coding	ENSG00000068654	POLR1A	591.033	501.048	781.948	476.221	561.359	606.239	535.207	681.288	547.868	510.905	693.53	329.653	511.562	743.004	640.404
ENSG00000068697	469.364	0.124232	0.100712	1.23432	0.217082	0.533527	coding	protein_coding	ENSG00000068697	LAPTM4A	452.051	444.062	479.649	564.793	502.305	439.001	420.806	473.545	456.556	445.732	497.03	420.415	512.368	458.102	474.051
ENSG00000068724	186.815	-0.234332	0.212512	-1.11427	0.265165	0.585724	coding	protein_coding	ENSG00000068724	TTC7A	188.762	205.365	189.441	171.394	107.686	179.341	216.09	234.051	126.431	251.379	101.14	100.18	268.268	248.505	214.193
ENSG00000068745	138.632	0.14119	0.139195	1.0144	0.31039	0.631939	coding	protein_coding	ENSG00000068745	IP6K2	134.378	130.1	133.012	135.734	148.677	159.537	159.224	145.148	133.455	132.672	89.5809	142.992	146.621	131.783	156.567
ENSG00000068781	0.299713	0.0328637	0.0421193	0.69226	0.488774		coding	protein_coding	ENSG00000068781	STON1-GTF2A1L	0	0	0	2.30058	1.3895	0	0	0	0	0	0	0	0.80561	0	0
ENSG00000068784	117.402	-0.0513765	0.214425	-0.241066	0.809504	0.94176	coding	protein_coding	ENSG00000068784	SRBD1	84.5976	79.5656	190.449	103.526	74.3383	157.336	96.3372	121.561	98.3352	141.983	141.596	169.536	105.535	110.447	85.8945
ENSG00000068793	828.054	0.38899	0.123698	3.14439	0.00166431	0.0192472	coding	protein_coding	ENSG00000068793	CYFIP1	766.558	619.321	752.726	1075.52	904.565	896.706	1023.58	839.136	986.864	668.017	684.861	759.487	955.454	687.781	800.233
ENSG00000068796	344.054	-0.166687	0.156635	-1.06398	0.287338	0.60936	coding	protein_coding	ENSG00000068796	KIF2A	335.801	412.881	356.713	358.891	332.786	271.762	293.026	312.975	347.685	437.586	410.338	329.653	320.633	404.134	235.938
ENSG00000068831	0.221641	-0.00663418	0.0420587	-0.164941	0.86899		coding	protein_coding	ENSG00000068831	RASGRP2	0.575494	0	0	0	0	0	0	0	0	0	0	0.856242	0.80561	0	1.08727
ENSG00000068878	590.635	-0.0520043	0.120281	-0.431006	0.666464	0.879855	coding	protein_coding	ENSG00000068878	PSME4	604.557	659.104	642.89	552.14	625.97	651.35	428.166	547.933	489.92	685.474	508.589	661.875	594.54	529.642	677.371
ENSG00000068885	116.862	-0.31908	0.207606	-1.53236	0.125435	0.394862	coding	protein_coding	ENSG00000068885	IFT80	99.2727	166.658	155.18	59.8152	125.055	117.727	97.6753	116.118	163.307	97.7586	127.147	107.03	133.731	85.3451	101.116
ENSG00000068903	125.551	0.367673	0.175039	2.09828	0.0358805	0.183773	coding	protein_coding	ENSG00000068903	SIRT2	115.387	133.326	82.6285	121.931	172.993	156.236	102.358	139.705	101.847	164.095	118.478	126.724	109.563	112.957	125.036
ENSG00000068912	209.434	-0.0415791	0.153746	-0.268063	0.788651	0.933376	coding	protein_coding	ENSG00000068912	ERLEC1	238.255	208.591	218.663	238.11	216.067	192.544	208.731	230.422	135.211	192.026	182.052	215.773	244.1	237.209	183.749
ENSG00000068971	30.7755	0.442458	0.223736	1.89356	0.0582836	0.249965	coding	protein_coding	ENSG00000068971	PPP2R5B	13.8119	30.1059	32.2453	54.0637	23.6215	71.5164	26.7603	7.25739	21.0718	25.6034	20.228	23.9748	23.3627	56.4784	31.5309
ENSG00000068976	2.58255	-0.22015	0.137952	-1.18586	0.235676		coding	protein_coding	ENSG00000068976	PYGM	14.6751	1.07521	1.00767	1.15029	3.47375	1.10025	0.669009	2.72152	0	0	2.88971	1.71248	4.83366	1.25508	2.17455
ENSG00000068985	0						coding	protein_coding	ENSG00000068985	PAGE1	0	0	0	0	0	0	0	0	0	0	0	0	0	0	0
ENSG00000069011	329.536	-0.182765	0.104413	-1.7522	0.0797393	0.302545	coding	protein_coding	ENSG00000069011	PITX1	352.49	321.488	342.606	263.417	326.533	297.068	297.04	340.19	328.369	323.534	317.868	327.941	337.551	385.308	381.633
ENSG00000069018	0						coding	protein_coding	ENSG00000069018	TRPC7	0	0	0	0	0	0	0	0	0	0	0	0	0	0	0
ENSG00000069020	198.043	0.366799	0.205068	1.7832	0.0745533	0.290734	coding	protein_coding	ENSG00000069020	MAST4	129.486	180.635	209.594	304.827	224.404	209.048	189.998	223.165	175.599	110.56	312.088	216.629	165.15	136.803	182.662
ENSG00000069122	0.0383663	-0.00842356	0.0419715	-0.164936	0.868994		coding	protein_coding	ENSG00000069122	GPR116	0.575494	0	0	0	0	0	0	0	0	0	0	0	0	0	0
ENSG00000069188	42.2774	0.265817	0.216504	1.18925	0.23434	0.554241	coding	protein_coding	ENSG00000069188	SDK2	50.3557	27.9555	24.184	34.5088	25.7058	112.226	42.1475	28.1224	103.603	38.4051	46.2353	16.2686	18.529	21.3363	44.5782
ENSG00000069206	0						coding	protein_coding	ENSG00000069206	ADAM7	0	0	0	0	0	0	0	0	0	0	0	0	0	0	0
ENSG00000069248	278.502	-0.655428	0.186328	-3.52853	0.000417878	0.00629163	coding	protein_coding	ENSG00000069248	NUP133	380.689	347.293	293.231	243.862	154.929	174.94	386.687	347.448	396.853	181.552	245.625	327.941	298.881	168.18	229.415
ENSG00000069275	4588.97	-0.146837	0.0836414	-1.75534	0.0792007	0.301064	coding	protein_coding	ENSG00000069275	NUCKS1	5150.1	4637.38	5031.27	4099.64	4938.98	4293.19	4337.18	4822.54	4244.22	4045.34	4663.99	4332.59	4513.03	4720.34	5004.72
ENSG00000069329	794.875	-0.269109	0.166801	-1.61068	0.10725	0.362025	coding	protein_coding	ENSG00000069329	VPS35	881.369	1091.34	818.224	876.523	837.175	518.219	770.029	862.723	672.543	886.81	757.103	690.988	896.644	780.657	582.778
ENSG00000069345	370.962	0.0422521	0.0975187	0.433459	0.664681	0.879362	coding	protein_coding	ENSG00000069345	DNAJA2	372.632	352.669	372.836	400.302	351.544	387.289	367.286	352.891	351.197	328.189	355.434	406.715	366.553	396.604	402.291
ENSG00000069399	246.177	-0.243144	0.119721	-2.02084	0.0432968	0.208391	coding	protein_coding	ENSG00000069399	BCL3	304.724	264.502	322.453	261.116	225.099	262.96	210.069	263.08	249.35	219.957	179.162	202.929	236.044	242.229	248.985
ENSG00000069424	45.9644	-0.133287	0.225813	-0.564773	0.572228	0.830365	coding	protein_coding	ENSG00000069424	KCNAB2	58.7004	38.7076	70.5366	35.6591	46.5483	60.5139	33.4504	26.308	22.8278	34.9138	75.1324	30.8247	82.9778	45.1827	27.1818
ENSG00000069431	152.405	-0.252998	0.173978	-1.46018	0.144241	0.427282	coding	protein_coding	ENSG00000069431	ABCC9	131.5	190.312	164.249	111.578	118.802	158.436	171.935	130.633	189.647	187.371	158.934	158.405	158.705	146.844	108.727
ENSG00000069482	5.18268	0.239123	0.190425	1.16936	0.242259	0.561885	coding	protein_coding	ENSG00000069482	GAL	2.01423	5.37605	6.04599	4.60117	10.4213	8.80202	5.35207	1.81435	1.75599	2.32758	11.5588	2.56873	3.22244	7.53045	4.34909
ENSG00000069493	5.32726	-0.142872	0.192451	-0.776609	0.43739	0.738856	coding	protein_coding	ENSG00000069493	CLEC2D	5.46719	7.52647	4.03066	3.45088	4.86325	2.20051	4.01405	2.72152	3.51197	3.49138	11.5588	23.1185	1.61122	1.25508	1.08727
ENSG00000069509	69.8025	-0.2997	0.179471	-1.66847	0.095223	0.337003	coding	protein_coding	ENSG00000069509	FUNDC1	66.4696	89.2425	87.6669	69.0175	51.4115	66.0152	60.2108	76.2026	59.7035	61.681	72.2427	79.6305	74.1161	62.7538	70.6727
ENSG00000069535	5.39207	0.221518	0.204702	1.228	0.219446	0.536924	coding	protein_coding	ENSG00000069535	MAOB	2.30198	2.15042	2.01533	2.30058	4.86325	5.50126	6.02108	3.6287	5.26796	9.31034	5.77942	5.9937	4.83366	10.0406	10.8727
ENSG00000069667	12.8828	-0.0247571	0.193286	-0.164528	0.869316	0.962136	coding	protein_coding	ENSG00000069667	RORA	22.4443	7.52647	1.00767	12.6532	5.55801	12.1028	7.3591	10.8861	35.1197	9.31034	20.228	15.4124	6.44488	16.316	10.8727
ENSG00000069696	2.40442	0.252704	0.160162	1.74172	0.0815571		coding	protein_coding	ENSG00000069696	DRD4	0.575494	2.15042	0	2.30058	3.47375	4.40101	0.669009	3.6287	1.75599	3.49138	5.77942	1.71248	1.61122	1.25508	3.26182
ENSG00000069702	66.0934	0.006201	0.220543	0.0284098	0.977335	0.995653	coding	protein_coding	ENSG00000069702	TGFBR3	54.0965	84.9416	73.5596	110.428	70.8646	33.0076	56.1967	100.696	45.6556	32.5862	34.6765	133.574	95.8676	32.632	32.6182
ENSG00000069712	11.8062	-0.216899	0.218878	-1.02081	0.307345	0.628621	coding	protein_coding	ENSG00000069712	KIAA1107	5.17945	17.2034	21.161	9.20234	6.25276	12.1028	9.36612	13.6076	14.0479	10.4741	11.5588	14.5561	12.8898	7.53045	11.96
ENSG00000069764	0						coding	protein_coding	ENSG00000069764	PLA2G10	0	0	0	0	0	0	0	0	0	0	0	0	0	0	0
ENSG00000069812	6.85491	0.0584842	0.168688	0.336842	0.736236	0.910643	coding	protein_coding	ENSG00000069812	HES2	6.90593	7.52647	4.03066	2.30058	4.86325	16.5038	8.0281	10.8861	8.77993	0	20.228	6.84994	4.83366	0	1.08727
ENSG00000069849	633.662	0.178473	0.121493	1.46912	0.1418	0.423782	coding	protein_coding	ENSG00000069849	ATP1B3	555.927	603.193	603.591	790.251	654.455	568.831	642.248	623.229	644.447	626.12	806.228	554.845	615.486	613.732	602.349
ENSG00000069869	1492.72	-0.230194	0.136064	-1.69387	0.0902894	0.326862	coding	protein_coding	ENSG00000069869	NEDD4	1315	1885.92	1336.16	1289.48	1166.49	1339.01	1836.43	1609.33	1439.91	1743.36	1470.86	1852.05	1589.47	1278.92	1238.4
ENSG00000069943	50.3501	-0.3584	0.220449	-1.64963	0.0990192	0.345449	coding	protein_coding	ENSG00000069943	PIGB	50.9312	73.1143	42.3219	29.9076	47.243	30.8071	30.7744	35.3798	68.4835	64.0086	66.4633	44.5246	46.7254	77.8147	46.7527
ENSG00000069956	621.401	0.509652	0.0987475	5.16032	2.46523e-07	9.46982e-06	coding	protein_coding	ENSG00000069956	MAPK6	561.682	492.447	533.055	735.037	804.521	769.077	581.369	611.435	609.327	734.353	644.405	605.363	548.62	478.184	612.135
ENSG00000069966	161.728	-0.158094	0.154574	-1.0244	0.305645	0.626634	coding	protein_coding	ENSG00000069966	GNB5	177.828	154.83	172.311	181.746	155.624	108.925	162.569	173.27	145.747	174.569	141.596	173.817	148.232	165.67	189.185
ENSG00000069974	61.3803	-0.0356396	0.184109	-0.197959	0.843077	0.952476	coding	protein_coding	ENSG00000069974	RAB27A	56.6862	54.8357	69.5289	66.7169	56.2748	51.7119	61.5488	61.6878	56.1916	53.5345	60.6839	48.8058	81.3666	87.8553	53.2764
ENSG00000069998	67.1465	0.376347	0.195694	1.92565	0.0541482	0.239753	coding	protein_coding	ENSG00000069998	CECR5	53.8087	56.9862	51.3909	67.8672	77.8121	83.6192	69.5769	63.5022	56.1916	45.3879	60.6839	92.4742	88.6171	57.7335	81.5455
ENSG00000070010	260.636	0.108955	0.128589	0.846134	0.397478	0.706792	coding	protein_coding	ENSG00000070010	UFD1L	250.34	218.268	264.008	288.723	261.226	248.657	295.033	252.194	252.862	246.724	190.721	292.835	293.242	286.157	268.556
ENSG00000070018	580.872	-0.64174	0.109197	-5.87117	4.3273e-09	2.42141e-07	coding	protein_coding	ENSG00000070018	LRP6	798.786	769.851	662.036	424.458	530.095	431.299	597.425	541.583	530.308	486.465	462.353	572.826	639.654	628.793	637.142
ENSG00000070019	0						coding	protein_coding	ENSG00000070019	GUCY2C	0	0	0	0	0	0	0	0	0	0	0	0	0	0	0
ENSG00000070031	0						coding	protein_coding	ENSG00000070031	SCT	0	0	0	0	0	0	0	0	0	0	0	0	0	0	0
ENSG00000070047	343.384	0.0747585	0.134043	0.558131	0.576755	0.832428	coding	protein_coding	ENSG00000070047	PHRF1	305.587	394.602	315.399	299.076	351.544	419.196	335.173	384.642	379.293	287.457	271.633	318.522	352.052	410.41	326.182
ENSG00000070061	324.697	-0.0688606	0.118254	-0.580671	0.561462	0.823096	coding	protein_coding	ENSG00000070061	IKBKAP	359.684	296.758	364.775	337.036	327.922	309.171	297.04	305.718	324.857	354.957	314.978	303.966	271.491	347.656	354.451
ENSG00000070081	140.15	0.104051	0.170783	0.608469	0.542877	0.811284	coding	protein_coding	ENSG00000070081	NUCB2	119.127	107.521	161.226	146.087	122.971	154.035	121.091	168.734	177.355	123.362	158.934	122.443	161.122	134.293	123.949
ENSG00000070087	649.237	-0.168505	0.0847794	-1.98789	0.0468239	0.218222	coding	protein_coding	ENSG00000070087	PFN2	682.824	621.472	730.557	573.996	625.97	600.738	612.143	654.98	686.591	587.715	696.42	656.738	658.989	684.016	665.411
ENSG00000070159	274.722	0.233091	0.147292	1.5828	0.113466	0.374262	coding	protein_coding	ENSG00000070159	PTPN3	232.212	288.156	210.602	318.631	284.848	272.863	297.709	300.275	235.302	288.621	366.993	227.76	273.102	266.076	257.684
ENSG00000070182	95.3438	0.0993557	0.180684	0.543397	0.586856	0.837869	coding	protein_coding	ENSG00000070182	SPTB	82.2957	79.5656	85.6515	104.677	78.5068	88.0202	127.781	108.861	94.8233	123.362	63.5736	82.1993	122.453	91.6205	96.7673
ENSG00000070190	0.822617	-0.0616764	0.102522	-0.56944	0.569057		coding	protein_coding	ENSG00000070190	DAPP1	0.863241	3.22563	0	0	0.694751	1.10025	1.33802	0	0	1.16379	0	0	1.61122	1.25508	1.08727
ENSG00000070193	0						coding	protein_coding	ENSG00000070193	FGF10	0	0	0	0	0	0	0	0	0	0	0	0	0	0	0
ENSG00000070214	384.457	0.0595657	0.135337	0.441177	0.659085	0.877195	coding	protein_coding	ENSG00000070214	SLC44A1	445.72	312.886	408.104	465.868	433.524	328.976	355.913	332.026	317.834	368.922	436.346	398.153	410.861	385.308	366.411
ENSG00000070269	71.6242	0.455508	0.203648	2.25357	0.024223	0.140868	coding	protein_coding	ENSG00000070269	TMEM260	45.1763	59.1366	51.3909	94.324	57.6643	90.2207	70.9149	64.4094	43.8997	107.069	92.4706	80.4868	49.1422	77.8147	90.2436
ENSG00000070366	208.47	-0.157682	0.188376	-0.837698	0.4022	0.711092	coding	protein_coding	ENSG00000070366	SMG6	243.146	224.719	185.41	161.041	240.384	165.038	167.921	180.528	266.91	187.371	153.155	203.786	182.873	328.83	235.938
ENSG00000070367	363.707	0.305594	0.151536	2.01725	0.0436695	0.209617	coding	protein_coding	ENSG00000070367	EXOC5	313.644	338.691	313.384	476.221	315.417	443.402	406.088	416.393	324.857	353.793	338.096	374.178	415.695	353.931	271.818
ENSG00000070371	208.574	0.221246	0.195495	1.13315	0.257151	0.57807	coding	protein_coding	ENSG00000070371	CLTCL1	218.112	126.875	167.272	200.151	214.678	218.95	237.498	181.435	136.967	247.888	427.677	208.923	171.595	185.751	184.836
ENSG00000070388	1.3474	-0.0715551	0.108599	-0.597163	0.550399		coding	protein_coding	ENSG00000070388	FGF22	0.575494	2.15042	4.03066	0	2.779	0	0.669009	1.81435	3.51197	0	0	3.42497	0	1.25508	0
ENSG00000070404	472.652	-0.0724952	0.125111	-0.580933	0.561285	0.823028	coding	protein_coding	ENSG00000070404	FSTL3	420.686	524.703	440.35	373.845	457.146	473.109	492.39	597.828	581.231	414.31	393	341.641	522.841	470.653	586.04
ENSG00000070413	142.444	-0.451319	0.181227	-2.50647	0.0121942	0.0869176	coding	protein_coding	ENSG00000070413	DGCR2	189.338	133.326	139.058	126.532	89.6228	100.123	213.414	131.54	136.967	132.672	138.706	133.574	135.343	158.139	178.313
ENSG00000070423	138.642	0.252041	0.160327	1.57243	0.115852	0.378529	coding	protein_coding	ENSG00000070423	RNF126	113.085	131.176	116.889	148.388	138.255	155.136	133.133	174.177	165.063	117.543	153.155	115.593	106.341	168.18	143.52
ENSG00000070444	150.125	0.659222	0.221197	2.94732	0.00320537	0.0324718	coding	protein_coding	ENSG00000070444	MNT	127.76	90.3177	99.7588	167.943	285.543	218.95	109.717	138.798	84.2873	141.983	291.86	113.88	116.008	71.5393	193.535
ENSG00000070476	72.3567	0.193	0.183667	1.04997	0.293732	0.616349	coding	protein_coding	ENSG00000070476	ZXDC	70.7858	51.6101	74.5672	85.1216	82.6753	67.1154	76.267	63.5022	56.1916	55.862	86.6912	72.7806	95.8676	77.8147	68.4982
ENSG00000070495	131.789	0.0663757	0.14202	0.473951	0.635535	0.864615	coding	protein_coding	ENSG00000070495	JMJD6	132.076	117.198	170.295	150.688	144.508	145.233	121.091	105.232	119.407	154.784	141.596	141.28	102.312	110.447	120.687
ENSG00000070501	48.4286	0.00526498	0.198639	0.0168066	0.986591	0.99674	coding	protein_coding	ENSG00000070501	POLB	39.7091	47.3093	48.3679	42.5608	43.0745	48.4111	41.4785	44.4515	61.4595	66.3362	43.3456	50.5183	49.9478	36.3972	63.0618
ENSG00000070526	0.623499	-0.036083	0.0619926	-0.714749	0.474764		coding	protein_coding	ENSG00000070526	ST6GALNAC1	0.575494	2.15042	0	0	0	0	4.68306	0	0	0	0	0.856242	0	0	1.08727
ENSG00000070540	34.036	-0.290106	0.21764	-1.34856	0.177479	0.478074	coding	protein_coding	ENSG00000070540	WIPI1	40.5723	31.1811	36.2759	16.1041	39.6008	20.9048	38.8025	30.8439	26.3398	34.9138	46.2353	32.5372	36.2525	45.1827	34.7927
ENSG00000070601	17.0046	0.0705874	0.223007	0.314532	0.753117	0.918123	coding	protein_coding	ENSG00000070601	FRMPD1	20.1423	19.3538	11.0843	9.20234	23.6215	24.2056	28.0984	27.2152	8.77993	19.7845	2.88971	19.6936	12.8898	15.0609	13.0473
ENSG00000070610	142.974	-0.156628	0.169871	-0.92303	0.355991	0.674358	coding	protein_coding	ENSG00000070610	GBA2	160.563	110.747	171.303	128.833	136.866	124.329	111.724	141.519	128.187	139.655	202.28	197.792	113.591	121.742	155.48
ENSG00000070614	883.096	-0.0877992	0.14795	-0.593383	0.552925	0.816915	coding	protein_coding	ENSG00000070614	NDST1	887.412	1131.12	714.435	824.759	737.13	989.127	839.606	769.284	955.257	718.06	783.111	681.569	1113.35	1223.7	878.516
ENSG00000070669	153.938	0.311081	0.147453	2.11068	0.0348002	0.179795	coding	protein_coding	ENSG00000070669	ASNS	154.232	150.529	120.92	197.85	165.351	187.043	127.112	168.734	135.211	186.207	127.147	177.242	135.343	138.058	138.084
ENSG00000070718	76.1438	-0.218722	0.216133	-1.00472	0.315032	0.636738	coding	protein_coding	ENSG00000070718	AP3M2	114.811	72.0391	74.5672	57.5146	58.3591	94.6217	70.9149	118.84	52.6796	64.0086	66.4633	80.4868	97.4788	55.2233	64.1491
ENSG00000070729	1.04292	-0.040925	0.0880758	-0.211721	0.832325		coding	protein_coding	ENSG00000070729	CNGB1	5.17945	2.15042	0	4.60117	0	1.10025	0.669009	0	0	0	0	0.856242	0	0	1.08727
ENSG00000070731	4.95024	0.277189	0.183017	1.70124	0.0888984	0.324144	coding	protein_coding	ENSG00000070731	ST6GALNAC2	2.87747	1.07521	1.00767	4.60117	9.03176	3.30076	8.0281	2.72152	8.77993	16.2931	5.77942	2.56873	2.41683	2.51015	3.26182
ENSG00000070748	0						coding	protein_coding	ENSG00000070748	CHAT	0	0	0	0	0	0	0	0	0	0	0	0	0	0	0
ENSG00000070756	5751.63	0.155441	0.112206	1.38536	0.165944	0.4627	coding	protein_coding	ENSG00000070756	PABPC1	5281.6	5648.08	5160.25	6830.43	6172.16	5052.36	5715.34	6226.84	7905.45	5402.32	5536.68	5174.27	5484.59	5566.26	5117.79
ENSG00000070759	0.968002	-0.025481	0.0882026	-0.334058	0.738336		coding	protein_coding	ENSG00000070759	TESK2	0.287747	0	3.023	1.15029	0.694751	0	0.669009	0	0	6.98275	0	1.71248	0	0	0
ENSG00000070761	123.454	-0.667308	0.162547	-4.09759	4.1748e-05	0.000890223	coding	protein_coding	ENSG00000070761	C16orf80	131.213	167.733	180.372	90.8731	88.9281	94.6217	140.492	108.861	129.943	81.4655	115.588	113.024	124.87	130.528	153.305
ENSG00000070770	547.586	-0.426487	0.112035	-3.80339	0.000142729	0.00254724	coding	protein_coding	ENSG00000070770	CSNK2A2	697.787	693.511	587.469	557.892	442.556	448.903	500.418	578.777	447.777	562.112	624.177	576.251	505.118	475.673	515.367
ENSG00000070778	192.58	0.0825021	0.177814	0.462753	0.643541	0.868944	coding	protein_coding	ENSG00000070778	PTPN21	181.281	181.711	161.226	156.44	248.721	154.035	218.766	204.114	184.379	173.405	132.927	250.879	227.988	217.128	195.709
ENSG00000070785	76.8555	-0.132634	0.21563	-0.611942	0.540576	0.809952	coding	protein_coding	ENSG00000070785	EIF2B3	66.4696	104.295	88.6745	93.1737	42.3798	90.2207	72.9219	97.9748	66.7275	59.3534	37.5662	87.3367	74.9217	74.0494	96.7673
ENSG00000070808	4.55695	-0.0927638	0.176206	-0.617921	0.536627		coding	protein_coding	ENSG00000070808	CAMK2A	2.58972	9.6769	2.01533	3.45088	1.3895	4.40101	4.68306	8.16457	0	9.31034	5.77942	4.28121	4.83366	1.25508	6.52364
ENSG00000070814	605.093	0.00202182	0.111355	0.0199203	0.984107	0.996295	coding	protein_coding	ENSG00000070814	TCOF1	635.346	567.711	736.603	639.562	669.74	631.545	583.376	555.191	551.38	415.474	609.728	489.771	658.183	681.506	651.276
ENSG00000070831	1193.81	0.0437713	0.0907055	0.483044	0.629065	0.862284	coding	protein_coding	ENSG00000070831	CDC42	1242.78	1177.36	1214.24	1359.65	1260.97	1134.36	1071.08	1202.01	1050.08	1099.78	1291.7	1268.95	1146.38	1099.45	1288.42
ENSG00000070882	170.113	0.316518	0.225423	1.40928	0.158751	0.451447	coding	protein_coding	ENSG00000070882	OSBPL3	108.481	156.981	136.035	203.602	162.572	234.354	268.941	84.3672	149.259	117.543	390.111	188.373	146.621	130.528	73.9345
ENSG00000070886	0						coding	protein_coding	ENSG00000070886	EPHA8	0	0	0	0	0	0	0	0	0	0	0	0	0	0	0
ENSG00000070915	0.0796614	-0.00285532	0.0419823	-0.0700196	0.944178		coding	protein_coding	ENSG00000070915	SLC12A3	0.287747	0	0	0	0	0	0	0.907174	0	0	0	0	0	0	0
ENSG00000070950	261.622	0.162759	0.158006	1.03044	0.302803	0.624092	coding	protein_coding	ENSG00000070950	RAD18	202.862	229.02	271.062	266.868	229.962	302.569	311.758	195.042	291.494	301.422	338.096	303.966	195.763	248.505	235.938
ENSG00000070961	834.712	0.419131	0.13147	3.18703	0.00143742	0.017223	coding	protein_coding	ENSG00000070961	ATP2B1	626.713	753.723	856.515	980.049	990.714	1100.25	904.5	745.697	679.567	1059.05	1005.62	970.979	703.298	643.854	500.145
ENSG00000070985	0.0775862	0	0.0419558	0	1		coding	protein_coding	ENSG00000070985	TRPM5	0	0	0	0	0	0	0	0	0	1.16379	0	0	0	0	0
ENSG00000071051	105.931	0.053003	0.185476	0.285501	0.77526	0.926861	coding	protein_coding	ENSG00000071051	NCK2	80.8569	138.702	87.6669	80.5204	122.276	112.226	103.027	117.933	101.847	110.56	135.816	89.9054	103.924	100.406	103.291
ENSG00000071054	862.981	0.21544	0.129033	1.66935	0.0950482	0.336678	coding	protein_coding	ENSG00000071054	MAP4K4	748.142	1006.4	765.825	905.28	1107.43	945.117	915.204	888.123	856.921	926.379	976.721	792.88	829.778	672.72	607.785
ENSG00000071073	39.2804	0.246999	0.208182	1.29098	0.196709	0.506582	coding	protein_coding	ENSG00000071073	MGAT4A	16.4016	41.9332	11.0843	92.0234	19.453	16.5038	21.4083	12.7004	17.5599	61.681	83.8015	44.5246	18.529	97.8959	33.7055
ENSG00000071082	749.541	-0.114659	0.0918798	-1.24676	0.212486	0.528001	coding	protein_coding	ENSG00000071082	RPL31	789.29	818.235	820.239	805.204	773.257	651.35	703.128	667.68	772.634	708.75	751.324	827.13	684.769	716.648	753.48
ENSG00000071127	1471.53	0.0716816	0.0927792	0.773221	0.439391	0.740639	coding	protein_coding	ENSG00000071127	WDR1	1536.28	1605.29	1436.93	1457.42	1611.13	1753.8	1368.12	1380.72	1294.16	1454.74	1337.93	1238.13	1349.4	1619.05	1629.82
ENSG00000071189	212.161	0.0573488	0.207651	0.276297	0.78232	0.929381	coding	protein_coding	ENSG00000071189	SNX13	170.346	327.939	124.95	222.006	204.257	231.053	193.344	239.494	184.379	165.259	306.309	252.591	228.793	179.476	152.218
ENSG00000071203	0						coding	protein_coding	ENSG00000071203	MS4A12	0	0	0	0	0	0	0	0	0	0	0	0	0	0	0
ENSG00000071205	82.841	0.245346	0.203209	1.20384	0.228653	0.54688	coding	protein_coding	ENSG00000071205	ARHGAP10	86.3241	45.1588	91.6975	82.821	111.16	90.2207	59.5418	88.9031	66.7275	96.5948	138.706	76.2056	65.2544	71.5393	71.76
ENSG00000071242	4.5636	-0.0763421	0.169194	-0.654255	0.512948		coding	protein_coding	ENSG00000071242	RPS6KA2	0.575494	4.30084	6.04599	4.60117	0.694751	1.10025	8.0281	9.97891	12.2919	2.32758	2.88971	1.71248	1.61122	2.51015	9.78545
ENSG00000071243	31.7917	-0.0811188	0.225503	-0.3731	0.709074	0.899285	coding	protein_coding	ENSG00000071243	ING3	36.5439	20.429	34.2606	35.6591	27.79	19.8045	19.4013	45.3587	12.2919	27.931	43.3456	31.681	45.9198	35.1421	41.3164
ENSG00000071246	43.1505	0.31274	0.220531	1.43927	0.150073	0.437266	coding	protein_coding	ENSG00000071246	VASH1	28.7747	30.1059	34.2606	49.4626	61.8328	19.8045	31.4434	42.6372	38.6317	59.3534	34.6765	33.3934	62.8376	60.2436	59.8
ENSG00000071282	94.9412	-0.0790756	0.180655	-0.434084	0.664228	0.879362	coding	protein_coding	ENSG00000071282	LMCD1	110.783	96.769	91.6975	104.677	93.7913	83.6192	99.6823	87.0887	121.163	103.578	86.6912	68.4994	69.2825	115.467	91.3309
ENSG00000071462	183.966	0.127727	0.121808	1.04957	0.293915	0.616411	coding	protein_coding	ENSG00000071462	WBSCR22	158.836	195.688	179.364	188.648	186.193	205.747	173.273	199.578	196.67	168.75	179.162	169.536	181.262	199.557	177.225
ENSG00000071537	529.811	-0.337926	0.115733	-2.91852	0.00351703	0.0349319	coding	protein_coding	ENSG00000071537	SEL1L	598.226	645.126	585.453	503.828	485.631	430.199	475.665	496.224	486.408	641.25	427.677	512.033	612.264	529.642	517.542
ENSG00000071539	301.34	-0.0823384	0.148016	-0.556481	0.577882	0.833006	coding	protein_coding	ENSG00000071539	TRIP13	330.621	267.727	318.422	250.764	319.585	289.366	280.984	285.76	370.513	288.621	378.552	267.148	245.711	333.85	292.476
ENSG00000071553	206.877	0.271416	0.123872	2.19354	0.0282686	0.157069	coding	protein_coding	ENSG00000071553	ATP6AP1	193.654	178.485	213.625	250.764	218.152	253.058	180.632	205.929	214.23	168.75	219.618	194.367	186.096	208.342	217.455
ENSG00000071564	357.343	-0.458839	0.162196	-2.8201	0.00480087	0.0443083	coding	protein_coding	ENSG00000071564	TCF3	475.934	382.775	516.932	251.914	390.45	301.469	289.012	321.14	379.293	325.862	288.971	384.453	326.272	296.198	429.473
ENSG00000071575	30.9127	0.901062	0.225968	4.05895	4.92928e-05	0.00102427	coding	protein_coding	ENSG00000071575	TRIB2	8.05692	20.429	17.1303	54.0637	52.8011	39.6091	42.1475	25.4009	35.1197	16.2931	11.5588	14.5561	36.2525	65.2639	25.0073
ENSG00000071626	475.276	-0.0814753	0.135805	-0.600207	0.548368	0.814663	coding	protein_coding	ENSG00000071626	DAZAP1	461.834	551.583	444.38	425.608	412.682	530.322	430.173	452.68	549.624	388.707	517.258	434.971	436.641	528.387	564.295
ENSG00000071655	195.389	-0.0637365	0.156057	-0.411526	0.680687	0.886632	coding	protein_coding	ENSG00000071655	MBD3	202.286	154.83	213.625	170.243	160.487	215.65	177.956	224.072	196.67	162.931	225.397	193.511	211.07	180.731	241.375
ENSG00000071677	0						coding	protein_coding	ENSG00000071677	PRLH	0	0	0	0	0	0	0	0	0	0	0	0	0	0	0
ENSG00000071794	351.669	-0.37676	0.186845	-2.02228	0.0431473	0.208094	coding	protein_coding	ENSG00000071794	HLTF	395.94	377.399	396.012	285.272	355.018	193.644	384.68	448.144	270.422	388.707	312.088	279.135	418.917	486.969	282.691
ENSG00000071859	201.136	0.224723	0.12629	1.78126	0.0748703	0.291383	coding	protein_coding	ENSG00000071859	FAM50A	188.187	177.41	208.587	251.914	212.594	217.85	204.717	196.857	191.403	223.448	193.61	184.092	203.819	158.139	204.407
ENSG00000071889	92.1065	-0.059912	0.200156	-0.303065	0.761841	0.922776	coding	protein_coding	ENSG00000071889	FAM3A	114.236	86.0169	68.5212	93.1737	90.3176	73.7169	94.3302	132.447	63.2155	75.6465	124.257	95.0429	87.8115	82.835	100.029
ENSG00000071894	295.447	-0.0215085	0.204181	-0.111302	0.911377	0.975186	coding	protein_coding	ENSG00000071894	CPSF1	268.468	251.599	216.648	310.579	179.94	233.254	279.646	395.528	516.26	402.672	433.456	197.792	246.517	294.943	204.407
ENSG00000071909	0						coding	protein_coding	ENSG00000071909	MYO3B	0	0	0	0	0	0	0	0	0	0	0	0	0	0	0
ENSG00000071967	130.36	0.0796205	0.151968	0.520629	0.602626	0.848704	coding	protein_coding	ENSG00000071967	CYBRD1	116.825	113.972	127.973	119.63	129.224	132.03	133.133	124.283	152.771	139.655	170.493	129.293	116.008	97.8959	152.218
ENSG00000071991	193.994	-0.359202	0.186057	-1.93063	0.053529	0.238348	coding	protein_coding	ENSG00000071991	CDH19	210.055	196.764	264.008	96.6245	191.751	196.945	219.435	178.713	152.771	175.733	138.706	176.386	252.156	259.801	200.058
ENSG00000071994	143.018	0.0948832	0.171817	0.551718	0.581142	0.835332	coding	protein_coding	ENSG00000071994	PDCD2	124.594	117.198	162.234	164.492	147.982	123.228	128.45	134.262	198.426	123.362	95.3604	151.555	153.066	156.884	164.178
ENSG00000072041	11.6827	0.229325	0.206726	1.06632	0.286278	0.608385	coding	protein_coding	ENSG00000072041	SLC6A15	9.7834	9.6769	10.0767	10.3526	27.0953	11.0025	6.02108	4.53587	10.5359	5.81896	2.88971	31.681	16.1122	8.78553	10.8727
ENSG00000072042	262.103	0.0601772	0.105099	0.575676	0.564835	0.825628	coding	protein_coding	ENSG00000072042	RDH11	277.964	277.404	245.87	263.417	291.795	283.865	272.956	259.452	280.958	243.233	262.963	230.329	222.348	254.78	264.207
ENSG00000072062	299.898	0.106804	0.109925	0.971944	0.331078	0.652555	coding	protein_coding	ENSG00000072062	PRKACA	290.049	305.36	272.07	322.082	318.891	297.068	287.005	358.334	309.054	260.69	320.758	268.86	313.382	298.708	276.167
ENSG00000072071	95.6168	-0.0978471	0.221956	-0.433953	0.664322	0.879362	coding	protein_coding	ENSG00000072071	LPHN1	83.7344	130.1	111.851	108.127	75.7278	106.725	64.8938	94.3461	194.914	61.681	52.0147	116.449	83.7835	64.0088	85.8945
ENSG00000072080	27.3899	-0.40728	0.225464	-1.92634	0.0540624	0.239523	coding	protein_coding	ENSG00000072080	SPP2	19.2791	40.858	26.1993	18.4047	13.895	15.4035	28.0984	36.287	8.77993	32.5862	40.4559	36.8184	34.6412	27.6117	31.5309
ENSG00000072110	2672.57	-0.00760114	0.0680909	-0.111503	0.911217	0.975169	coding	protein_coding	ENSG00000072110	ACTN1	2895.02	2781.57	2438.55	2711.24	2754.69	2617.5	2768.36	2599.96	2656.81	2512.63	2820.35	2625.24	2660.93	2631.89	2613.8
ENSG00000072121	159.681	0.0639676	0.22625	0.283404	0.776867	0.927477	coding	protein_coding	ENSG00000072121	ZFYVE26	250.34	97.8442	86.6592	118.48	122.971	237.655	153.872	229.515	103.603	116.379	89.5809	127.58	132.926	361.462	166.353
ENSG00000072133	25.6407	0.675471	0.22506	2.93085	0.00338033	0.0337867	coding	protein_coding	ENSG00000072133	RPS6KA6	22.1565	11.8273	18.138	47.162	27.79	49.5114	12.0422	22.6794	19.3158	30.2586	46.2353	23.1185	15.3066	23.8464	15.2218
ENSG00000072134	135.98	-0.259627	0.19904	-1.30182	0.192978	0.500874	coding	protein_coding	ENSG00000072134	EPN2	174.662	126.875	153.165	81.6707	145.898	128.73	133.802	163.291	214.23	154.784	124.257	101.893	133.731	125.508	77.1964
ENSG00000072135	90.4861	0.0375239	0.2233	0.16856	0.866143	0.961288	coding	protein_coding	ENSG00000072135	PTPN18	104.164	106.446	91.6975	71.3181	90.3176	155.136	95.6682	62.595	38.6317	47.7155	144.485	91.6179	106.341	65.2639	85.8945
ENSG00000072163	11.703	0.181307	0.225405	0.807881	0.419159	0.725994	coding	protein_coding	ENSG00000072163	LIMS2	8.63241	13.9777	9.06899	17.2544	15.2845	7.70177	10.0351	9.97891	3.51197	15.1293	8.66912	11.9874	13.6954	17.5711	13.0473
ENSG00000072182	0.271912	0	0.042124	0	1		coding	protein_coding	ENSG00000072182	ASIC4	0	0	0	0	0	0	0	0	0	0	0	0.856242	3.22244	0	0
ENSG00000072195	17.4312	0.123094	0.204849	0.657487	0.510868	0.791454	coding	protein_coding	ENSG00000072195	SPEG	16.9771	7.52647	8.06132	16.1041	21.5373	8.80202	48.1686	14.5148	17.5599	20.9483	5.77942	9.41867	4.83366	35.1421	26.0945
ENSG00000072201	0.122038	-0.0077184	0.0420033	-0.164938	0.868993		coding	protein_coding	ENSG00000072201	LNX1	0.575494	0	0	0	0	0	0	0	0	0	0	0	0	1.25508	0
ENSG00000072210	662.438	-0.311027	0.155833	-1.99475	0.0460704	0.216078	coding	protein_coding	ENSG00000072210	ALDH3A2	855.472	667.706	727.534	605.054	644.034	506.116	621.509	596.921	665.519	527.198	794.67	468.365	807.221	601.181	848.073
ENSG00000072274	943.213	-0.0969055	0.100718	-0.961193	0.336455	0.656964	coding	protein_coding	ENSG00000072274	TFRC	1033.01	991.344	1011.7	921.384	1027.54	876.901	881.084	781.984	913.113	894.956	1080.75	996.666	804.805	901.144	1031.82
ENSG00000072310	379.018	-0.215657	0.159658	-1.3444	0.178819	0.479902	coding	protein_coding	ENSG00000072310	SREBF1	425.866	431.159	523.986	355.44	319.585	486.312	325.807	312.975	238.814	287.457	271.633	396.44	395.555	421.705	492.535
ENSG00000072315	0						coding	protein_coding	ENSG00000072315	TRPC5	0	0	0	0	0	0	0	0	0	0	0	0	0	0	0
ENSG00000072364	879.604	-0.0683034	0.191665	-0.357084	0.721029	0.904599	coding	protein_coding	ENSG00000072364	AFF4	965.104	705.338	970.381	616.557	992.799	872.5	832.916	771.098	902.577	1237.11	482.581	905.048	1040.04	1069.32	830.676
ENSG00000072401	85.0646	0.105597	0.177397	0.600129	0.54842	0.814663	coding	protein_coding	ENSG00000072401	UBE2D1	82.2957	81.716	102.782	100.075	105.602	83.6192	76.936	82.5528	79.0194	67.5	115.588	61.6494	81.3666	87.8553	67.4109
ENSG00000072415	211.738	-0.529511	0.189306	-2.78462	0.00535905	0.0480859	coding	protein_coding	ENSG00000072415	MPP5	262.425	319.338	270.054	201.301	141.729	189.243	291.688	203.207	135.211	157.112	199.39	214.917	210.264	151.864	228.327
ENSG00000072422	176.405	-0.64621	0.154104	-4.18452	2.85766e-05	0.000645369	coding	protein_coding	ENSG00000072422	RHOBTB1	234.802	238.697	202.541	138.035	132.003	134.231	162.569	156.034	214.23	183.879	135.816	136.999	153.872	207.087	215.28
ENSG00000072444	0.0671777	-0.00547692	0.0419576	-0.164204	0.86957		coding	protein_coding	ENSG00000072444	ASAH2C	0	0	1.00767	0	0	0	0	0	0	0	0	0	0	0	0
ENSG00000072501	1136.51	-0.456367	0.0987591	-4.62132	3.81301e-06	0.000111282	coding	protein_coding	ENSG00000072501	SMC1A	1315.87	1440.78	1171.91	985.8	848.985	985.826	1097.17	1252.81	1115.05	1117.24	1043.18	1090	1304.28	1064.3	1214.48
ENSG00000072506	220.931	0.171893	0.127889	1.34196	0.17961	0.480901	coding	protein_coding	ENSG00000072506	HSD17B10	189.913	199.989	193.472	227.758	206.341	231.053	196.689	232.237	237.058	233.922	274.522	189.23	228.793	252.27	220.716
ENSG00000072518	244.604	-0.191744	0.195178	-0.986147	0.324061	0.645533	coding	protein_coding	ENSG00000072518	MARK2	250.915	248.374	261.993	218.555	172.993	247.557	222.78	234.051	398.609	205.991	381.441	208.067	247.322	168.18	202.233
ENSG00000072571	254.96	-0.430103	0.184478	-2.33178	0.0197121	0.122291	coding	protein_coding	ENSG00000072571	HMMR	277.676	333.315	306.33	177.145	219.541	229.953	284.998	239.494	194.914	250.215	164.713	342.497	322.244	282.392	198.971
ENSG00000072609	92.1918	-0.566151	0.205978	-2.74954	0.00596792	0.0520061	coding	protein_coding	ENSG00000072609	CHFR	107.617	124.724	119.912	70.1678	61.1381	70.4162	116.408	107.047	93.0673	94.2672	121.368	59.937	59.6151	121.742	55.4509
ENSG00000072657	0.72531	-0.0338833	0.0428825	-0.739396	0.459667		coding	protein_coding	ENSG00000072657	TRHDE	0	0	6.04599	0	0	0	0	0	0	0	0	0	4.83366	0	0
ENSG00000072682	200.278	0.718758	0.152421	4.70236	2.57176e-06	7.81035e-05	coding	protein_coding	ENSG00000072682	P4HA2	185.885	144.078	175.334	304.827	306.385	289.366	209.4	171.456	119.407	196.681	219.618	163.542	175.623	179.476	163.091
ENSG00000072694	0						coding	protein_coding	ENSG00000072694	FCGR2B	0	0	0	0	0	0	0	0	0	0	0	0	0	0	0
ENSG00000072736	225.556	-0.00276007	0.183271	-0.016653	0.986713	0.99674	coding	protein_coding	ENSG00000072736	NFATC3	208.041	198.914	231.763	194.399	217.457	224.452	216.759	201.393	215.986	158.276	369.883	262.866	202.208	287.412	193.535
ENSG00000072756	139.105	-0.0732382	0.137522	-0.54032	0.588977	0.83913	coding	protein_coding	ENSG00000072756	TRNT1	136.392	148.379	114.874	134.584	125.055	118.827	173.273	146.962	136.967	148.965	167.603	160.974	123.258	133.038	117.425
ENSG00000072778	619.172	0.366652	0.0989549	3.70495	0.000211429	0.00353534	coding	protein_coding	ENSG00000072778	ACADVL	534.059	504.274	560.262	617.707	764.226	701.961	657.636	623.229	669.031	559.784	702.199	647.319	613.069	535.917	596.913
ENSG00000072786	196.759	0.589548	0.195883	3.02015	0.00252649	0.0269183	coding	protein_coding	ENSG00000072786	STK10	120.854	197.839	101.774	261.116	279.29	180.441	139.154	234.051	226.522	281.638	199.39	236.323	147.427	169.435	176.138
ENSG00000072803	317.973	-0.196559	0.11671	-1.68409	0.0921638	0.330789	coding	protein_coding	ENSG00000072803	FBXW11	331.772	339.767	354.698	302.527	291.795	290.467	299.047	304.81	345.929	329.353	271.633	348.491	292.436	287.412	379.458
ENSG00000072818	1.65404	0.0442918	0.0962916	0.461641	0.644339		coding	protein_coding	ENSG00000072818	ACAP1	1.15099	0	2.01533	0	2.779	3.30076	2.00703	0	5.26796	0	5.77942	0	0	2.51015	0
ENSG00000072832	32.158	-0.224916	0.205041	-1.07588	0.281982	0.603403	coding	protein_coding	ENSG00000072832	CRMP1	39.4214	43.0084	30.23	25.3064	33.348	31.9073	26.0913	32.6583	28.0958	39.5689	34.6765	26.5435	30.6132	32.632	28.2691
ENSG00000072840	215.07	0.11772	0.19709	0.597352	0.550272	0.815273	coding	protein_coding	ENSG00000072840	EVC	194.229	183.861	227.732	264.567	247.331	162.837	230.808	195.042	159.795	181.552	338.096	184.092	196.569	289.922	169.615
ENSG00000072849	160.248	0.0389072	0.157983	0.2396	0.81064	0.942002	coding	protein_coding	ENSG00000072849	DERL2	143.298	118.273	157.196	144.937	164.656	121.028	153.203	177.806	156.283	172.241	231.177	148.13	189.318	170.69	155.48
ENSG00000072858	51.1722	0.0372761	0.224973	0.155926	0.876091	0.963458	coding	protein_coding	ENSG00000072858	SIDT1	55.8229	35.482	35.2683	60.9655	23.6215	51.7119	72.9219	78.017	45.6556	43.0603	75.1324	50.5183	70.8937	32.632	35.88
ENSG00000072864	230.171	-0.0619717	0.154531	-0.401585	0.687989	0.889872	coding	protein_coding	ENSG00000072864	NDE1	257.246	226.869	205.564	217.405	211.204	232.153	218.766	163.291	221.254	226.94	309.199	196.936	218.32	256.035	291.389
ENSG00000072952	0.394128	0.0125341	0.0473195	0.2347	0.814442		coding	protein_coding	ENSG00000072952	MRVI1	0.575494	0	0	1.15029	0.694751	0	0	0	0	3.49138	0	0	0	0	0
ENSG00000072954	6.45666	-0.489168	0.194993	-2.2644	0.0235494	0.138195	coding	protein_coding	ENSG00000072954	TMEM38A	9.7834	22.5794	8.06132	4.60117	4.1685	2.20051	4.01405	7.25739	5.26796	2.32758	2.88971	4.28121	4.02805	1.25508	14.1345
ENSG00000072958	139.361	0.55875	0.202193	2.75835	0.00580935	0.0510311	coding	protein_coding	ENSG00000072958	AP1M1	117.976	120.424	84.6439	265.717	143.813	145.233	173.942	144.241	117.651	182.715	130.037	113.024	111.174	94.1306	145.695
ENSG00000073008	571.641	-0.426673	0.0925235	-4.60692	4.0868e-06	0.00011806	coding	protein_coding	ENSG00000073008	PVR	741.236	624.697	698.312	503.828	518.284	499.515	519.82	603.271	554.892	569.094	528.816	492.339	605.819	554.743	559.945
ENSG00000073009	143.588	0.0217335	0.18598	0.115535	0.908021	0.974236	coding	protein_coding	ENSG00000073009	IKBKG	126.896	129.025	153.165	108.127	156.319	149.634	139.823	131.54	186.135	211.81	158.934	122.443	126.481	155.629	97.8545
ENSG00000073050	104.793	-0.233161	0.173772	-1.34787	0.177699	0.478412	coding	protein_coding	ENSG00000073050	XRCC1	113.948	119.348	94.7205	108.127	77.8121	85.8197	92.3232	79.8313	115.895	135	112.699	100.18	94.2564	134.293	107.64
ENSG00000073060	310.571	0.114678	0.169424	0.676908	0.498464	0.783183	coding	protein_coding	ENSG00000073060	SCARB1	311.918	268.803	303.307	295.625	265.395	415.895	300.385	386.456	400.365	378.233	199.39	302.254	265.046	277.372	288.127
ENSG00000073067	0						coding	protein_coding	ENSG00000073067	CYP2W1	0	0	0	0	0	0	0	0	0	0	0	0	0	0	0
ENSG00000073111	343.114	-0.480278	0.1485	-3.23532	0.00121505	0.0150815	coding	protein_coding	ENSG00000073111	MCM2	395.652	421.483	392.989	258.816	229.268	342.179	373.307	289.389	352.953	366.595	288.971	262.866	439.863	346.401	385.982
ENSG00000073146	0.651819	0.0671866	0.0885058	0.709947	0.477737		coding	protein_coding	ENSG00000073146	MOV10L1	0.287747	0	1.00767	1.15029	1.3895	1.10025	0.669009	0	1.75599	0	0	0	2.41683	0	0
ENSG00000073150	42.5007	0.0901764	0.197517	0.458741	0.64642	0.87001	coding	protein_coding	ENSG00000073150	PANX2	40.2846	48.3845	35.2683	49.4626	42.3798	42.9099	35.4575	35.3798	52.6796	50.0431	34.6765	31.681	49.1422	45.1827	44.5782
ENSG00000073169	55.1918	0.103059	0.198244	0.518552	0.604073	0.849654	coding	protein_coding	ENSG00000073169	SELO	45.1763	54.8357	51.3909	50.6129	45.1588	70.4162	50.8447	70.7596	59.7035	45.3879	83.8015	53.087	50.7534	42.6726	53.2764
ENSG00000073282	319.521	0.430667	0.15542	2.77638	0.00549683	0.0489821	coding	protein_coding	ENSG00000073282	TP63	196.244	315.037	236.801	366.943	306.385	376.286	361.934	342.912	265.154	361.939	326.537	271.429	371.386	358.951	334.88
ENSG00000073331	51.9616	-0.0271078	0.224718	-0.121828	0.903035	0.973221	coding	protein_coding	ENSG00000073331	ALPK1	37.1194	80.6408	39.2989	37.9596	69.4751	40.7093	70.9149	40.8228	63.2155	36.0776	43.3456	72.7806	45.9198	65.2639	35.88
ENSG00000073350	94.066	-0.528536	0.206327	-2.60417	0.00920984	0.071296	coding	protein_coding	ENSG00000073350	LLGL2	95.8198	123.649	94.7205	85.1216	55.5801	44.0101	110.386	117.025	114.139	89.612	72.2427	85.6242	159.511	92.8756	70.6727
ENSG00000073417	739.808	-0.075145	0.0950826	-0.789858	0.429611	0.733196	coding	protein_coding	ENSG00000073417	PDE8A	776.342	806.408	736.603	700.528	698.224	799.884	812.177	737.533	667.275	778.577	687.75	839.974	704.103	636.323	715.425
ENSG00000073464	34.1472	-0.514725	0.208797	-2.45797	0.0139726	0.0955232	coding	protein_coding	ENSG00000073464	CLCN4	40.2846	53.7605	34.2606	28.7573	25.011	22.0051	24.7533	33.5654	36.8757	44.2241	37.5662	31.681	37.0581	27.6117	34.7927
ENSG00000073536	71.4141	0.0221158	0.2065	0.107041	0.914757	0.97645	coding	protein_coding	ENSG00000073536	NLE1	63.3044	70.9639	77.5902	71.3181	54.1906	91.321	90.9852	86.1815	42.1437	73.3189	63.5736	41.9559	84.5891	72.7944	86.9818
ENSG00000073578	598.084	-0.113711	0.152789	-0.745219	0.456139	0.752394	coding	protein_coding	ENSG00000073578	SDHA	731.453	632.224	449.419	531.435	499.526	632.645	781.402	647.722	581.231	615.646	514.368	709.825	508.34	559.764	576.255
ENSG00000073584	524.282	-0.319463	0.0910961	-3.50504	0.00045654	0.00678035	coding	protein_coding	ENSG00000073584	SMARCE1	598.514	554.809	634.829	508.429	446.03	469.808	513.13	451.773	486.408	565.603	491.25	506.895	514.785	552.233	569.731
ENSG00000073598	0.0836717	0	0.0419558	0	1		coding	protein_coding	ENSG00000073598	FNDC8	0	0	0	0	0	0	0	0	0	0	0	0	0	1.25508	0
ENSG00000073605	13.9956	0.16679	0.226102	0.710026	0.477688	0.766901	coding	protein_coding	ENSG00000073605	GSDMB	10.0711	6.45126	8.06132	14.9538	7.64226	11.0025	28.0984	21.7722	17.5599	19.7845	14.4485	11.1311	13.6954	10.0406	15.2218
ENSG00000073614	464.032	-0.0116227	0.200444	-0.057586	0.954078	0.990455	coding	protein_coding	ENSG00000073614	KDM5A	547.583	463.416	410.12	540.637	366.134	502.815	456.933	398.249	446.021	334.008	832.236	345.066	460.003	361.462	495.796
ENSG00000073670	3.77639	0.0498048	0.183688	0.278758	0.780431		coding	protein_coding	ENSG00000073670	ADAM11	2.01423	5.37605	1.00767	3.45088	2.779	3.30076	3.34504	2.72152	8.77993	2.32758	2.88971	1.71248	3.22244	5.0203	8.69818
ENSG00000073711	79.8103	0.874093	0.189177	4.61748	3.88422e-06	0.000112897	coding	protein_coding	ENSG00000073711	PPP2R3A	58.4127	47.3093	33.2529	97.7748	105.602	111.126	82.2881	90.7174	77.2634	110.56	69.353	73.6368	69.2825	96.6408	73.9345
ENSG00000073712	491.214	-0.511795	0.14638	-3.48337	0.000495152	0.00718856	coding	protein_coding	ENSG00000073712	FERMT2	711.599	674.157	670.097	404.903	490.494	480.81	501.757	382.827	370.513	424.784	352.544	429.834	578.428	533.407	362.062
ENSG00000073734	0.225904	-0.0062081	0.0420584	-0.080022	0.93622		coding	protein_coding	ENSG00000073734	ABCB11	1.15099	0	0	1.15029	0	0	0	0	0	0	0	0	0	0	1.08727
ENSG00000073737	1.61057	0.0746815	0.122959	0.692723	0.488483		coding	protein_coding	ENSG00000073737	DHRS9	1.43874	0	0	0	2.08425	2.20051	1.33802	3.6287	7.02395	0	2.88971	0.856242	1.61122	0	1.08727
ENSG00000073754	0						coding	protein_coding	ENSG00000073754	CD5L	0	0	0	0	0	0	0	0	0	0	0	0	0	0	0
ENSG00000073756	322.026	0.152444	0.179493	0.848362	0.396237	0.705993	coding	protein_coding	ENSG00000073756	PTGS2	369.18	320.413	327.491	457.816	247.331	461.006	369.293	239.494	287.982	313.06	254.294	285.129	340.773	247.25	309.873
ENSG00000073792	91.378	0.172653	0.225792	0.768176	0.442382	0.742589	coding	protein_coding	ENSG00000073792	IGF2BP2	71.0735	82.7912	86.6592	152.989	87.5386	60.5139	81.6191	111.582	77.2634	83.7931	83.8015	154.98	141.787	46.4378	47.84
ENSG00000073803	92.9531	-0.349518	0.173185	-2.02804	0.042556	0.206222	coding	protein_coding	ENSG00000073803	MAP3K13	96.9708	102.145	97.7435	79.3702	76.4226	63.8147	86.3021	91.6246	94.8233	73.3189	150.265	94.1867	99.09	90.3654	97.8545
ENSG00000073849	41.6777	0.269212	0.219779	1.21654	0.223781	0.542529	coding	protein_coding	ENSG00000073849	ST6GAL1	42.2988	29.0307	44.3373	34.5088	40.9903	82.5189	38.8025	45.3587	21.0718	48.8793	60.6839	46.2371	32.2244	28.8667	29.3564
ENSG00000073861	0						coding	protein_coding	ENSG00000073861	TBX21	0	0	0	0	0	0	0	0	0	0	0	0	0	0	0
ENSG00000073905	0						pseudo	pseudogene	ENSG00000073905	VDAC1P1	0	0	0	0	0	0	0	0	0	0	0	0	0	0	0
ENSG00000073910	2.36094	0.100055	0.163124	0.704727	0.48098		coding	protein_coding	ENSG00000073910	FRY	1.43874	1.07521	0	1.15029	2.779	1.10025	4.01405	0.907174	1.75599	3.49138	2.88971	4.28121	2.41683	3.76523	4.34909
ENSG00000073921	639.117	0.129612	0.147957	0.876152	0.380948	0.695403	coding	protein_coding	ENSG00000073921	PICALM	750.732	669.856	557.239	856.968	676.687	664.553	671.016	577.87	500.456	686.638	459.464	736.368	605.819	601.181	571.905
ENSG00000073969	157.722	-0.614545	0.179098	-3.43243	0.000598194	0.0084263	coding	protein_coding	ENSG00000073969	NSF	244.585	183.861	154.173	156.44	92.4018	100.123	141.83	136.983	159.795	146.638	179.162	199.504	145.01	164.415	160.916
ENSG00000074047	336.459	0.449825	0.145941	3.08235	0.00205376	0.0227514	coding	protein_coding	ENSG00000074047	GLI2	267.317	273.104	305.323	358.891	377.25	466.507	403.412	287.574	358.221	285.129	182.052	289.41	419.723	397.859	375.109
ENSG00000074054	292.344	-0.127395	0.20281	-0.632522	0.527046	0.803055	coding	protein_coding	ENSG00000074054	CLASP1	327.744	279.555	264.008	324.382	209.12	239.855	318.448	242.215	402.121	343.319	343.875	319.378	210.264	405.389	155.48
ENSG00000074071	258.034	0.00629866	0.121375	0.0517945	0.958692	0.991117	coding	protein_coding	ENSG00000074071	MRPS34	238.83	250.524	283.154	247.313	267.479	255.259	239.505	238.587	293.25	223.448	225.397	260.298	247.322	308.748	291.389
ENSG00000074181	64.3619	0.139273	0.201702	0.698751	0.484708	0.772153	coding	protein_coding	ENSG00000074181	NOTCH3	80.5692	65.5879	64.4906	100.075	46.5483	100.123	52.1827	44.4515	45.6556	70.9913	63.5736	63.3619	49.9478	60.2436	57.6255
ENSG00000074201	271.193	-0.0669136	0.106972	-0.621096	0.534536	0.806467	coding	protein_coding	ENSG00000074201	CLNS1A	288.61	291.382	307.338	320.931	267.479	257.459	257.568	252.194	256.374	251.379	260.074	279.135	256.99	237.209	283.778
ENSG00000074211	370.363	0.0841579	0.104266	0.805426	0.420574	0.726762	coding	protein_coding	ENSG00000074211	PPP2R2C	332.636	342.992	352.683	360.041	353.628	378.487	394.046	356.519	426.705	320.043	442.125	341.641	384.276	389.073	380.545
ENSG00000074219	177.904	0.11499	0.212213	0.542922	0.587184	0.838	coding	protein_coding	ENSG00000074219	TEAD2	174.95	172.034	133.012	304.827	136.171	102.323	227.463	202.3	268.666	123.362	153.155	147.274	151.455	144.334	227.24
ENSG00000074266	66.2991	0.0522746	0.197144	0.264355	0.791506	0.934413	coding	protein_coding	ENSG00000074266	EED	77.1162	64.5126	51.3909	67.8672	66.6961	71.5164	62.8868	90.7174	45.6556	75.6465	49.125	77.0618	74.9217	55.2233	64.1491
ENSG00000074276	0.105079	0	0.0419945	0	1		coding	protein_coding	ENSG00000074276	CDHR2	0	0	0	0	0	0	0.669009	0.907174	0	0	0	0	0	0	0
ENSG00000074317	1.03247	-0.0659607	0.100372	-0.910516	0.36255		coding	protein_coding	ENSG00000074317	SNCB	0	3.22563	1.00767	1.15029	0	0	1.33802	0	0	1.16379	0	0.856242	0.80561	3.76523	2.17455
ENSG00000074319	168.925	-0.270219	0.142573	-1.89078	0.0586541	0.251251	coding	protein_coding	ENSG00000074319	TSG101	199.696	154.83	219.671	143.787	157.014	166.138	183.977	151.498	186.135	185.043	147.375	148.13	153.872	168.18	168.527
ENSG00000074356	181.582	-0.317317	0.186553	-1.69771	0.0895618	0.325586	coding	protein_coding	ENSG00000074356	C17orf85	237.679	237.622	153.165	184.047	162.572	129.83	153.872	254.009	159.795	132.672	199.39	142.992	170.789	193.282	212.018
ENSG00000074370	19.262	-0.048566	0.219492	-0.219183	0.826508	0.948111	coding	protein_coding	ENSG00000074370	ATP2A3	12.0854	30.1059	19.1456	31.0579	17.3688	6.60152	11.3731	14.5148	12.2919	27.931	43.3456	11.9874	19.3346	10.0406	21.7455
ENSG00000074410	1356.24	0.111913	0.0814562	1.3747	0.169226	0.466335	coding	protein_coding	ENSG00000074410	CA12	1431.54	1357.99	1341.2	1663.32	1373.52	1453.43	1272.45	1348.06	1164.22	1325.56	1343.71	1405.09	1209.22	1311.55	1342.78
ENSG00000074416	579.524	0.65053	0.165776	3.92949	8.51271e-05	0.00163723	coding	protein_coding	ENSG00000074416	MGLL	460.108	349.443	401.051	774.147	681.55	623.843	614.819	596.921	528.552	538.836	988.28	536.008	479.338	586.12	533.851
ENSG00000074527	248.123	0.579179	0.182521	3.18306	0.00145727	0.0173906	coding	protein_coding	ENSG00000074527	NTN4	191.352	154.83	167.272	249.613	275.816	331.176	284.329	292.11	152.771	299.095	326.537	239.748	261.018	303.728	192.447
ENSG00000074582	61.6274	0.23265	0.212232	1.10445	0.269399	0.590274	coding	protein_coding	ENSG00000074582	BCS1L	40.5723	54.8357	56.4292	80.5204	54.8853	56.1129	58.8728	64.4094	33.3637	76.8103	80.9118	71.9244	45.1142	53.9682	95.68
ENSG00000074590	263.509	0.246425	0.179481	1.37892	0.16792	0.464962	coding	protein_coding	ENSG00000074590	NUAK1	176.101	220.418	215.64	262.267	305.69	183.742	343.201	327.49	277.446	215.302	164.713	265.435	403.611	244.74	346.84
ENSG00000074603	385.471	-0.169308	0.14939	-1.13213	0.257579	0.57827	coding	protein_coding	ENSG00000074603	DPP8	428.168	449.438	386.943	342.787	402.955	358.682	353.237	446.33	324.857	460.862	254.294	349.347	393.138	441.786	389.244
ENSG00000074621	66.6289	0.0964557	0.226316	0.424413	0.671265	0.882253	coding	protein_coding	ENSG00000074621	SLC24A1	42.0111	73.1143	80.6132	97.7748	40.2955	84.7194	62.8868	30.8439	114.139	69.8275	49.125	48.8058	58.8095	46.4378	100.029
ENSG00000074657	459.872	-0.300699	0.152008	-1.97828	0.0478974	0.221748	coding	protein_coding	ENSG00000074657	ZNF532	520.534	481.694	541.116	509.579	336.259	372.986	499.749	396.435	340.661	458.534	540.375	381.884	541.37	459.357	517.542
ENSG00000074660	1.50483	-0.0258782	0.114079	-0.239017	0.811093		coding	protein_coding	ENSG00000074660	SCARF1	0	5.37605	0	1.15029	1.3895	1.10025	4.01405	0.907174	1.75599	2.32758	2.88971	0.856242	0.80561	0	0
ENSG00000074695	517.051	0.139288	0.11406	1.2216	0.221859	0.540039	coding	protein_coding	ENSG00000074695	LMAN1	452.626	534.38	500.81	601.603	493.273	552.327	555.946	479.895	619.863	496.939	476.802	542.858	526.063	490.734	431.647
ENSG00000074696	1422.14	-0.0831663	0.0720253	-1.15475	0.248192	0.567984	coding	protein_coding	ENSG00000074696	PTPLAD1	1464.34	1388.1	1513.51	1267.62	1459.67	1381.92	1433.69	1421.54	1308.21	1464.05	1476.64	1322.04	1429.96	1512.37	1488.48
ENSG00000074706	0.168863	-0.0027089	0.0420451	-0.0700219	0.944176		coding	protein_coding	ENSG00000074706	IPCEF1	0.287747	0	0	0	0	0	1.33802	0.907174	0	0	0	0	0	0	0
ENSG00000074755	435.933	0.157934	0.155644	1.01411	0.310532	0.632049	coding	protein_coding	ENSG00000074755	ZZEF1	486.868	501.048	340.591	472.77	618.328	415.895	375.314	393.714	498.7	459.698	366.993	382.74	404.416	446.807	375.109
ENSG00000074771	0.0733502	0.0111095	0.0419558	0.30069	0.763651		coding	protein_coding	ENSG00000074771	NOX3	0	0	0	0	0	1.10025	0	0	0	0	0	0	0	0	0
ENSG00000074800	6598.24	0.163906	0.0635705	2.57835	0.00992736	0.0752119	coding	protein_coding	ENSG00000074800	ENO1	6125.56	6026.56	6555.87	7093.85	7091.32	6817.17	6269.95	7050.56	7294.37	6247.24	6201.31	6195.77	6353.85	6607.97	7042.27
ENSG00000074803	0						coding	protein_coding	ENSG00000074803	SLC12A1	0	0	0	0	0	0	0	0	0	0	0	0	0	0	0
ENSG00000074842	99.3478	0.290815	0.155695	1.86577	0.0620731	0.261078	coding	protein_coding	ENSG00000074842	C19orf10	93.5178	76.34	82.6285	115.029	93.7913	117.727	93.6612	117.025	107.115	103.578	106.919	109.599	85.3947	104.171	83.72
ENSG00000074855	34.6139	0.20938	0.211837	0.989003	0.322662	0.644009	coding	protein_coding	ENSG00000074855	ANO8	31.0767	25.8051	37.2836	47.162	38.906	30.8071	43.4856	27.2152	40.3877	51.2069	23.1177	44.5246	25.7795	26.3566	26.0945
ENSG00000074935	21.8472	0.323041	0.224461	1.44637	0.148072	0.434376	coding	protein_coding	ENSG00000074935	TUBE1	12.9486	29.0307	14.1073	27.607	25.011	27.5063	22.7463	19.9578	26.3398	18.6207	26.0074	18.8373	25.7795	12.5508	20.6582
ENSG00000074964	45.1948	-0.285902	0.205415	-1.37527	0.169048	0.466087	coding	protein_coding	ENSG00000074964	ARHGEF10L	52.0822	66.6631	46.3526	26.4567	41.685	56.1129	37.4645	48.0802	40.3877	32.5862	46.2353	48.8058	45.9198	40.1624	48.9273
ENSG00000074966	2.08003	0.0498243	0.117872	0.542302	0.58761		coding	protein_coding	ENSG00000074966	TXK	0.863241	1.07521	1.00767	5.75146	0	0	2.00703	4.53587	8.77993	2.32758	0	0	0	3.76523	1.08727
ENSG00000075035	0.283024	-0.0237167	0.0420627	-0.535931	0.592006		coding	protein_coding	ENSG00000075035	WSCD2	0	2.15042	1.00767	0	0	0	0	0	0	0	0	0	0	0	1.08727
ENSG00000075043	2.14565	0.0659101	0.129949	0.807099	0.419609		coding	protein_coding	ENSG00000075043	KCNQ2	0.575494	1.07521	0	1.15029	0	3.30076	1.33802	9.07174	1.75599	5.81896	2.88971	0	1.61122	2.51015	1.08727
ENSG00000075073	0.314638	0.00971483	0.0539979	0.164412	0.869407		coding	protein_coding	ENSG00000075073	TACR2	0.287747	0	0	1.15029	0	0	1.33802	0	0	0	0	0.856242	0	0	1.08727
ENSG00000075089	63.5486	-0.633486	0.188051	-3.31714	0.000909431	0.0119241	coding	protein_coding	ENSG00000075089	ACTR6	73.3755	106.446	110.843	60.9655	56.2748	46.2106	60.8798	49.8946	40.3877	55.862	43.3456	56.512	67.6713	61.4987	63.0618
ENSG00000075131	107.373	-0.628247	0.1589	-3.92966	8.50658e-05	0.00163723	coding	protein_coding	ENSG00000075131	TIPIN	142.723	121.499	164.249	86.2719	97.2651	72.6167	103.696	95.2533	84.2873	83.7931	101.14	111.311	111.174	109.192	126.124
ENSG00000075142	246.331	0.175203	0.153685	1.13963	0.254442	0.574585	coding	protein_coding	ENSG00000075142	SRI	229.622	218.268	229.748	256.515	294.574	226.652	258.906	253.102	138.723	251.379	271.633	259.441	261.823	267.331	277.255
ENSG00000075151	478.603	0.223672	0.133862	1.67018	0.0948845	0.336224	coding	protein_coding	ENSG00000075151	EIF4G3	492.623	382.775	405.081	419.857	589.843	514.918	522.496	408.228	417.925	472.5	554.824	503.47	468.059	537.172	489.273
ENSG00000075188	99.3974	-0.151379	0.161007	-0.929413	0.352675	0.671598	coding	protein_coding	ENSG00000075188	NUP37	106.179	123.649	118.904	115.029	99.3493	92.4212	111.724	80.7385	75.5074	81.4655	80.9118	91.6179	93.4508	116.722	103.291
ENSG00000075213	148.182	-0.0183344	0.204323	-0.0918152	0.926845	0.981426	coding	protein_coding	ENSG00000075213	SEMA3A	97.2585	127.95	194.479	147.237	151.456	108.925	143.168	127.004	96.5792	185.043	98.2501	154.124	226.376	143.079	221.804
ENSG00000075218	208.857	-0.0274903	0.14007	-0.195275	0.845178	0.953319	coding	protein_coding	ENSG00000075218	GTSE1	239.406	169.883	229.748	228.908	196.614	207.948	234.822	215	217.742	218.793	164.713	234.61	197.374	203.322	173.964
ENSG00000075223	1206.41	0.05655	0.085191	0.66372	0.50687	0.78794	coding	protein_coding	ENSG00000075223	SEMA3C	1136.89	1194.56	1203.15	1208.96	1274.87	1189.37	1230.98	1118.55	1165.97	1358.15	1126.99	1288.64	1338.92	1160.94	1099.23
ENSG00000075234	33.7308	-0.520109	0.224668	-2.21816	0.0265442	0.150488	coding	protein_coding	ENSG00000075234	TTC38	38.2704	46.2341	80.6132	36.8093	31.2638	19.8045	26.0913	39.9157	21.0718	19.7845	23.1177	33.3934	21.7515	27.6117	40.2291
ENSG00000075239	189.984	0.176891	0.133628	1.3255	0.185007	0.488697	coding	protein_coding	ENSG00000075239	ACAT1	174.662	193.538	177.349	204.752	179.246	242.056	208.731	162.384	214.23	171.077	196.5	183.236	176.429	180.731	184.836
ENSG00000075240	87.0938	0.0263586	0.217488	0.133184	0.894048	0.968824	coding	protein_coding	ENSG00000075240	GRAMD4	36.2561	120.424	40.3066	59.8152	80.5911	66.0152	179.294	49.8946	73.7514	289.784	54.9044	67.6431	41.0861	64.0088	82.6327
ENSG00000075275	665.136	-0.504362	0.128891	-3.91088	9.19609e-05	0.00175176	coding	protein_coding	ENSG00000075275	CELSR1	836.193	875.222	740.634	546.389	550.937	574.332	744.607	695.803	590.011	630.775	445.015	702.975	614.681	672.72	756.742
ENSG00000075290	0.0191831	-0.00303674	0.0419456	-0.0700174	0.94418		coding	protein_coding	ENSG00000075290	WNT8B	0.287747	0	0	0	0	0	0	0	0	0	0	0	0	0	0
ENSG00000075292	423.377	0.0399898	0.164346	0.242862	0.808112	0.941487	coding	protein_coding	ENSG00000075292	ZNF638	312.493	498.898	367.798	357.741	358.491	497.314	503.095	352.891	475.872	523.707	445.015	446.102	455.17	401.624	354.451
ENSG00000075303	44.8345	-0.242231	0.226233	-1.0422	0.297321	0.619623	coding	protein_coding	ENSG00000075303	SLC25A40	45.464	82.7912	47.3603	57.5146	26.4005	44.0101	67.5699	25.4009	50.9236	36.0776	28.8971	40.2434	30.6132	25.1015	64.1491
ENSG00000075336	131.858	-0.112336	0.155856	-0.716259	0.473832	0.764078	coding	protein_coding	ENSG00000075336	TIMM21	136.68	134.401	164.249	123.081	126.445	147.434	113.062	127.912	82.5314	121.034	118.478	143.849	123.258	155.629	159.829
ENSG00000075340	547.408	0.121728	0.167957	0.724577	0.468712	0.760644	coding	protein_coding	ENSG00000075340	ADD2	608.585	419.332	482.672	555.591	718.372	399.392	650.276	480.802	453.044	494.612	505.699	548.851	698.464	630.048	565.382
ENSG00000075388	0						coding	protein_coding	ENSG00000075388	FGF4	0	0	0	0	0	0	0	0	0	0	0	0	0	0	0
ENSG00000075391	353.182	0.769823	0.166442	4.62299	3.78245e-06	0.000110617	coding	protein_coding	ENSG00000075391	RASAL2	235.089	212.892	312.376	444.013	488.41	500.615	397.391	434.536	321.345	543.491	323.647	318.522	266.657	249.76	248.985
ENSG00000075399	23.8501	0.318765	0.225521	1.40319	0.160559	0.454495	coding	protein_coding	ENSG00000075399	VPS9D1	18.7036	18.2786	22.1686	26.4567	11.8108	58.3134	20.0703	18.1435	21.0718	22.1121	20.228	34.2497	29.002	17.5711	19.5709
ENSG00000075407	166.12	-0.0385321	0.206577	-0.190418	0.848981	0.955753	coding	protein_coding	ENSG00000075407	ZNF37A	124.594	218.268	127.973	155.289	91.7071	205.747	152.534	174.177	210.718	201.336	196.5	160.974	202.208	122.997	146.782
ENSG00000075413	392.519	0.0966175	0.114474	0.844189	0.398564	0.707833	coding	protein_coding	ENSG00000075413	MARK3	441.404	355.895	344.621	366.943	460.62	407.093	459.609	431.815	398.609	371.25	398.78	386.165	353.663	367.737	343.578
ENSG00000075415	1177.86	0.0666784	0.0975273	0.683999	0.493976	0.779231	coding	protein_coding	ENSG00000075415	SLC25A3	1138.62	1223.59	1165.87	1402.21	1181.08	1120.06	1262.42	1111.29	1101	951.982	1121.21	1173.05	1180.22	1267.63	1267.76
ENSG00000075420	916.392	0.381627	0.130027	2.93574	0.00332748	0.0333455	coding	protein_coding	ENSG00000075420	FNDC3B	719.368	830.063	722.496	842.014	1152.59	1036.44	1075.1	781.984	863.945	1028.79	1080.75	1052.32	924.035	916.205	719.775
ENSG00000075426	1227.39	0.0497641	0.0668389	0.744378	0.456648	0.752733	coding	protein_coding	ENSG00000075426	FOSL2	1196.16	1191.33	1208.19	1154.89	1332.53	1226.78	1164.08	1267.32	1211.63	1260.39	1233.91	1266.38	1171.36	1261.35	1264.5
ENSG00000075429	0.122187	0	0.0419945	0	1		coding	protein_coding	ENSG00000075429	CACNG5	0	0	0	0	0	0	0.669009	0	0	1.16379	0	0	0	0	0
ENSG00000075461	148.829	-0.528664	0.136376	-3.8763	0.000106057	0.0019676	coding	protein_coding	ENSG00000075461	CACNG4	173.799	167.733	171.303	112.729	119.497	107.825	119.084	152.405	158.039	161.767	144.485	127.58	170.789	168.18	177.225
ENSG00000075539	254.855	0.152153	0.213071	0.706825	0.479675	0.767898	coding	protein_coding	ENSG00000075539	FRYL	211.494	346.218	218.663	273.77	314.027	316.873	183.977	184.156	242.326	356.12	424.787	177.242	204.625	105.426	263.12
ENSG00000075568	300.403	-0.103695	0.1105	-0.933544	0.350539	0.669639	coding	protein_coding	ENSG00000075568	TMEM131	320.263	337.616	346.637	334.735	304.301	289.366	280.315	253.102	258.13	288.621	390.111	354.484	261.823	256.035	230.502
ENSG00000075618	1099.02	-0.177489	0.0661328	-2.68336	0.00728855	0.0600882	coding	protein_coding	ENSG00000075618	FSCN1	1204.51	1106.39	1208.19	978.899	1086.59	1037.54	1049.67	1099.49	1143.15	1021.81	988.28	1038.62	1168.94	1140.86	1212.31
ENSG00000075624	28386.9	0.087514	0.0738929	1.18433	0.236281	0.556095	coding	protein_coding	ENSG00000075624	ACTB	27338.6	27209.3	29259.6	31403	30057.7	27736.3	28440.2	29299	23863.9	26951.1	27634.3	26783.3	29772.1	29381.3	30674.1
ENSG00000075643	57.5585	0.0412351	0.22489	0.183027	0.854777	0.956578	coding	protein_coding	ENSG00000075643	MOCOS	67.6206	50.5349	43.3296	92.0234	42.3798	38.5088	60.8798	73.4811	128.187	34.9138	28.8971	46.2371	40.2805	38.9073	77.1964
ENSG00000075651	92.8099	0.250023	0.173732	1.43074	0.152505	0.440829	coding	protein_coding	ENSG00000075651	PLD1	76.8285	76.34	55.4216	104.677	86.8438	69.3159	115.739	117.025	89.5553	124.526	118.478	108.743	92.6452	69.0291	86.9818
ENSG00000075673	0.0733502	0.0111095	0.0419558	0.30069	0.763651		coding	protein_coding	ENSG00000075673	ATP12A	0	0	0	0	0	1.10025	0	0	0	0	0	0	0	0	0
ENSG00000075702	193.521	0.182903	0.184186	0.993846	0.320298	0.64181	coding	protein_coding	ENSG00000075702	WDR62	169.771	175.259	157.196	188.648	196.614	204.647	169.928	223.165	261.642	199.009	127.147	178.098	145.815	294.943	210.931
ENSG00000075711	271.359	0.0444703	0.171917	0.259483	0.795262	0.936149	coding	protein_coding	ENSG00000075711	DLG1	265.591	365.572	223.702	282.972	338.344	261.86	225.456	267.616	310.81	266.508	193.61	268.86	298.076	204.577	296.825
ENSG00000075785	707.775	0.339082	0.0852035	3.98032	6.88231e-05	0.00136935	coding	protein_coding	ENSG00000075785	RAB7A	634.77	647.277	662.036	862.719	809.385	807.585	729.888	651.351	751.562	685.474	748.434	658.45	586.484	694.057	687.156
ENSG00000075790	165.665	0.268146	0.140409	1.90753	0.0564522	0.245369	coding	protein_coding	ENSG00000075790	BCAP29	147.039	146.229	127.973	149.538	177.161	193.644	166.583	171.456	149.259	126.853	164.713	172.961	190.124	180.731	220.716
ENSG00000075826	25.9862	-0.790085	0.22452	-3.39063	0.00069733	0.00961371	coding	protein_coding	ENSG00000075826	SEC31B	50.6435	22.5794	54.4139	14.9538	18.7583	15.4035	43.4856	24.4937	33.3637	25.6034	26.0074	17.9811	14.501	11.2957	16.3091
ENSG00000075856	229.944	-0.0612853	0.186322	-0.330039	0.74137	0.91239	coding	protein_coding	ENSG00000075856	SART3	294.365	208.591	181.38	281.822	223.015	148.534	228.801	227.701	156.283	218.793	257.184	214.061	232.016	271.096	305.524
ENSG00000075884	0.309445	0.00948147	0.042059	0.300684	0.763655		coding	protein_coding	ENSG00000075884	ARHGAP15	0	0	0	1.15029	0	0	0	0	0	3.49138	0	0	0	0	0
ENSG00000075886	0						coding	protein_coding	ENSG00000075886	TUBA3D	0	0	0	0	0	0	0	0	0	0	0	0	0	0	0
ENSG00000075891	3.25198	0.140993	0.156217	0.804462	0.42113		coding	protein_coding	ENSG00000075891	PAX2	2.30198	1.07521	6.04599	8.05204	0.694751	8.80202	4.68306	1.81435	0	2.32758	0	3.42497	1.61122	2.51015	5.43636
ENSG00000075914	78.0823	-0.00904921	0.170192	-0.0464112	0.962982	0.992057	coding	protein_coding	ENSG00000075914	EXOSC7	78.555	75.2647	96.7358	88.5725	76.4226	83.6192	68.2389	86.1815	86.0433	60.5172	63.5736	84.768	66.06	74.0494	82.6327
ENSG00000075945	62.7024	0.0423196	0.196612	0.214286	0.830324	0.949275	coding	protein_coding	ENSG00000075945	KIFAP3	65.6063	55.911	60.4599	44.8614	66.0013	79.2182	47.4996	64.4094	59.7035	61.681	66.4633	86.4805	77.3386	52.7132	52.1891
ENSG00000075975	100.012	-0.148371	0.156299	-0.959843	0.337134	0.657837	coding	protein_coding	ENSG00000075975	MKRN2	107.042	95.6938	92.7052	93.1737	83.3701	89.1205	89.6472	103.418	91.3113	100.086	86.6912	131.005	120.842	111.702	104.378
ENSG00000076003	399.705	-0.283795	0.125177	-2.27021	0.0231948	0.136678	coding	protein_coding	ENSG00000076003	MCM6	401.119	393.527	447.403	303.677	389.755	301.469	388.694	387.363	467.092	325.862	421.897	378.459	422.14	459.357	507.756
ENSG00000076043	146.027	-0.0173685	0.130273	-0.132158	0.894859	0.969186	coding	protein_coding	ENSG00000076043	REXO2	152.218	149.454	139.058	149.538	158.403	126.529	130.457	134.262	122.919	162.931	196.5	177.242	137.759	136.803	116.338
ENSG00000076053	133.787	-0.29547	0.151296	-1.95201	0.0509374	0.231243	coding	protein_coding	ENSG00000076053	RBM7	149.916	158.056	139.058	112.729	104.213	138.632	135.14	127.004	100.091	119.871	127.147	119.874	132.926	184.496	157.655
ENSG00000076067	398.373	0.182228	0.111492	1.63527	0.101992	0.351506	coding	protein_coding	ENSG00000076067	RBMS2	392.487	326.864	428.258	437.111	433.524	446.703	367.286	372.849	367.001	374.741	476.802	404.146	426.973	374.012	346.84
ENSG00000076108	555.835	-0.0660415	0.141102	-0.470158	0.638242	0.86624	coding	protein_coding	ENSG00000076108	BAZ2A	583.551	497.823	498.794	481.972	585.675	433.5	608.129	625.95	410.901	638.922	577.942	621.632	666.24	574.824	531.676
ENSG00000076201	162.26	0.101042	0.17967	0.562964	0.573459	0.831466	coding	protein_coding	ENSG00000076201	PTPN23	157.11	125.8	189.441	133.434	160.487	222.251	248.871	175.992	212.474	129.181	144.485	119.018	156.288	107.936	151.131
ENSG00000076242	239.008	-0.147754	0.172654	-0.856291	0.391837	0.702936	coding	protein_coding	ENSG00000076242	MLH1	245.448	249.449	259.978	255.365	225.794	184.842	248.202	219.536	344.173	224.612	182.052	250.023	182.873	208.342	304.436
ENSG00000076248	250.898	-0.558471	0.136174	-4.09905	4.14853e-05	0.000886662	coding	protein_coding	ENSG00000076248	UNG	297.243	282.78	324.468	184.047	199.393	203.547	244.857	316.604	231.79	212.974	254.294	195.223	303.715	230.934	281.604
ENSG00000076258	2.61863	0.0174874	0.107835	0.222583	0.82386		coding	protein_coding	ENSG00000076258	FMO4	0.575494	4.30084	0	1.15029	0.694751	4.40101	0	8.16457	0	10.4741	0	0	4.83366	2.51015	2.17455
ENSG00000076321	84.1002	0.218691	0.207478	1.05138	0.293083	0.615405	coding	protein_coding	ENSG00000076321	KLHL20	89.7771	72.0391	64.4906	69.0175	126.445	85.8197	79.612	72.5739	61.4595	125.69	63.5736	73.6368	118.425	82.835	76.1091
ENSG00000076344	11.279	-0.529218	0.205115	-2.77776	0.00547357	0.0488975	coding	protein_coding	ENSG00000076344	RGS11	6.33044	20.429	27.207	2.30058	4.1685	5.50126	6.02108	15.422	12.2919	11.6379	8.66912	7.70618	6.44488	26.3566	8.69818
ENSG00000076351	122.533	-0.186919	0.202261	-0.931458	0.351616	0.670629	coding	protein_coding	ENSG00000076351	SLC46A1	140.996	134.401	95.7282	132.284	93.0966	86.92	81.6191	110.675	121.163	123.362	222.507	101.037	149.843	128.018	116.338
ENSG00000076356	71.0497	0.147189	0.225172	0.64934	0.516118	0.794291	coding	protein_coding	ENSG00000076356	PLXNA2	73.6633	75.2647	46.3526	133.434	59.7486	52.8121	117.077	90.7174	33.3637	50.0431	40.4559	65.9307	136.954	46.4378	43.4909
ENSG00000076382	436.097	-0.0531396	0.112369	-0.472791	0.636362	0.865259	coding	protein_coding	ENSG00000076382	SPAG5	452.914	412.881	459.495	432.51	401.566	444.502	422.144	387.363	493.432	364.267	482.581	361.334	485.783	440.531	500.145
ENSG00000076513	134.59	0.262839	0.141076	1.86355	0.0623853	0.261481	coding	protein_coding	ENSG00000076513	ANKRD13A	132.076	111.822	127.973	155.289	172.993	128.73	133.133	135.169	121.163	130.345	156.044	160.974	123.258	109.192	120.687
ENSG00000076554	384.973	0.240976	0.163856	1.47045	0.14144	0.423041	coding	protein_coding	ENSG00000076554	TPD52	385.293	304.285	344.621	465.868	418.24	380.687	390.032	322.954	489.92	422.457	393	375.89	484.977	304.983	291.389
ENSG00000076555	159.515	0.104958	0.204281	0.513318	0.607729	0.851426	coding	protein_coding	ENSG00000076555	ACACB	193.078	93.5433	163.242	216.255	154.929	132.03	159.893	134.262	177.355	171.077	75.1324	155.836	204.625	174.455	187.011
ENSG00000076604	121.215	-0.253121	0.191762	-1.33065	0.183304	0.486245	coding	protein_coding	ENSG00000076604	TRAF4	108.193	99.9946	170.295	90.8731	89.6228	118.827	118.415	110.675	138.723	158.276	121.368	101.893	137.759	154.374	98.9418
ENSG00000076641	14.7493	0.867888	0.204255	4.50649	6.59098e-06	0.000179459	coding	protein_coding	ENSG00000076641	PAG1	4.31621	1.07521	1.00767	52.9134	17.3688	22.0051	8.69711	49.8946	19.3158	13.9655	8.66912	9.41867	3.22244	5.0203	4.34909
ENSG00000076650	143.536	-0.0479487	0.194988	-0.257327	0.796926	0.936859	coding	protein_coding	ENSG00000076650	GPATCH1	107.905	122.574	132.004	123.081	118.802	102.323	179.963	184.156	115.895	104.741	225.397	165.255	194.958	153.119	122.862
ENSG00000076662	15.9079	0.0727317	0.220859	0.329314	0.741918	0.912546	coding	protein_coding	ENSG00000076662	ICAM3	10.6466	16.1282	22.1686	23.0058	11.116	20.9048	23.4153	12.7004	14.0479	5.81896	20.228	11.1311	12.0842	27.6117	7.61091
ENSG00000076685	445.829	-0.0184971	0.123826	-0.151908	0.879259	0.965036	coding	protein_coding	ENSG00000076685	NT5C2	433.347	408.58	407.097	439.412	401.566	393.89	398.06	504.389	454.8	464.353	566.383	378.459	505.118	440.531	491.447
ENSG00000076706	19.2758	0.00248615	0.211955	0.0118032	0.990583	0.997286	coding	protein_coding	ENSG00000076706	MCAM	10.6466	9.6769	39.2989	17.2544	29.8743	11.0025	20.0703	14.5148	19.3158	13.9655	8.66912	47.9496	16.1122	18.8261	11.96
ENSG00000076716	0.359565	0.00837793	0.0560555	0.170083	0.864945		coding	protein_coding	ENSG00000076716	GPC4	0.287747	0	0	0	0.694751	0	0	0	0	0	0	1.71248	1.61122	0	1.08727
ENSG00000076770	0.180765	0.0100295	0.0420288	0.300686	0.763654		coding	protein_coding	ENSG00000076770	MBNL3	0	0	0	0	0	1.10025	0	0	0	0	0	0	1.61122	0	0
ENSG00000076826	25.2691	-0.0374947	0.225418	-0.178316	0.858475	0.958263	coding	protein_coding	ENSG00000076826	CAMSAP3	23.3075	35.482	12.092	21.8555	21.5373	23.1053	28.7674	28.1224	19.3158	17.4569	40.4559	18.8373	51.559	17.5711	19.5709
ENSG00000076864	63.5311	-0.603593	0.21766	-2.75423	0.0058831	0.0514746	coding	protein_coding	ENSG00000076864	RAP1GAP	56.1107	121.499	88.6745	43.7111	40.2955	52.8121	101.02	73.4811	101.847	58.1896	49.125	29.9685	49.1422	57.7335	29.3564
ENSG00000076924	93.5435	-0.187707	0.160112	-1.18911	0.234396	0.554241	coding	protein_coding	ENSG00000076924	XAB2	90.3526	98.9194	79.6055	72.4684	82.6753	73.7169	103.696	89.8102	103.603	97.7586	124.257	87.3367	87.8115	99.1509	111.989
ENSG00000076928	265.462	0.26429	0.154426	1.71107	0.0870681	0.320181	coding	protein_coding	ENSG00000076928	ARHGEF1	255.232	225.794	237.809	241.561	300.132	348.78	293.026	215.907	295.006	210.646	208.059	295.404	284.38	312.514	257.684
ENSG00000076944	83.5412	-0.335119	0.214874	-1.60704	0.108046	0.36321	coding	protein_coding	ENSG00000076944	STXBP2	84.3099	90.3177	75.5749	73.6187	50.022	50.6116	146.513	72.5739	77.2634	69.8275	60.6839	135.286	89.4227	80.3248	96.7673
ENSG00000076984	107.801	0.0950738	0.145793	0.648389	0.516733	0.794817	coding	protein_coding	ENSG00000076984	MAP2K7	97.5463	89.2425	114.874	95.4742	109.076	118.827	121.76	122.468	100.091	108.233	92.4706	98.4679	113.591	114.212	120.687
ENSG00000077009	0						coding	protein_coding	ENSG00000077009	NMRK2	0	0	0	0	0	0	0	0	0	0	0	0	0	0	0
ENSG00000077044	830.603	0.561641	0.126643	4.43722	9.11293e-06	0.000237655	coding	protein_coding	ENSG00000077044	DGKD	648.006	611.795	487.71	1009.96	867.744	808.686	977.422	934.389	1023.74	903.103	878.471	765.481	769.358	1015.36	757.829
ENSG00000077063	10.5272	-0.364086	0.185965	-1.93701	0.0527445	0.236108	coding	protein_coding	ENSG00000077063	CTTNBP2	17.8403	7.52647	29.2223	5.75146	3.47375	7.70177	4.01405	19.9578	7.02395	9.31034	5.77942	5.13745	27.3907	1.25508	6.52364
ENSG00000077080	0						coding	protein_coding	ENSG00000077080	ACTL6B	0	0	0	0	0	0	0	0	0	0	0	0	0	0	0
ENSG00000077092	27.3506	-0.0859485	0.221061	-0.37273	0.709349	0.899285	coding	protein_coding	ENSG00000077092	RARB	30.2134	36.5572	26.1993	39.1099	25.011	20.9048	23.4153	19.0507	28.0958	40.7327	28.8971	23.9748	28.1964	13.8058	26.0945
ENSG00000077097	881.528	-0.139831	0.100538	-1.38973	0.164611	0.460886	coding	protein_coding	ENSG00000077097	TOP2B	852.307	1052.63	1025.8	885.725	820.501	931.914	879.746	720.296	709.418	938.017	875.581	934.16	892.616	857.216	846.985
ENSG00000077147	1210.92	-0.0329789	0.081062	-0.406504	0.684372	0.887644	coding	protein_coding	ENSG00000077147	TM9SF3	1269.25	1166.6	1295.86	1261.87	1247.08	1137.66	1204.88	1170.25	1134.37	1110.26	1202.12	1310.91	1185.05	1321.59	1145.99
ENSG00000077150	345.058	1.4059	0.156944	8.96306	3.15794e-19	6.80058e-17	coding	protein_coding	ENSG00000077150	NFKB2	151.355	186.011	165.257	580.898	455.062	523.72	320.455	298.46	451.288	506.25	421.897	365.615	294.853	229.679	225.065
ENSG00000077152	96.8088	-0.15908	0.17383	-0.925843	0.354527	0.673469	coding	protein_coding	ENSG00000077152	UBE2T	82.8712	121.499	87.6669	94.324	70.8646	88.0202	96.3372	86.1815	107.115	103.578	78.0221	118.161	97.4788	116.722	103.291
ENSG00000077157	157.155	-0.175438	0.226046	-0.778062	0.436533	0.738184	coding	protein_coding	ENSG00000077157	PPP1R12B	131.788	168.808	210.602	63.2661	218.846	119.928	198.696	233.144	280.958	151.293	78.0221	168.68	176.429	107.936	48.9273
ENSG00000077232	534.565	-0.166156	0.0986114	-1.68418	0.0921465	0.330789	coding	protein_coding	ENSG00000077232	DNAJC10	594.485	582.764	530.032	487.724	540.516	484.111	518.482	443.608	449.532	550.474	679.081	613.926	549.426	508.305	486.011
ENSG00000077235	662.836	-0.311059	0.151013	-2.06238	0.0391715	0.195075	coding	protein_coding	ENSG00000077235	GTF3C1	853.746	601.043	653.975	495.776	568.306	587.535	697.107	758.398	695.371	528.362	424.787	753.493	815.277	758.065	751.305
ENSG00000077238	146.575	0.383726	0.213095	1.7792	0.0752068	0.292264	coding	protein_coding	ENSG00000077238	IL4R	140.996	164.507	82.6285	216.255	182.719	177.141	163.907	194.135	296.762	76.8103	135.816	79.6305	140.176	67.7741	79.3709
ENSG00000077254	187.691	0.13076	0.190429	0.686862	0.49217	0.777823	coding	protein_coding	ENSG00000077254	USP33	168.62	225.794	166.265	256.515	151.456	223.351	187.991	165.106	217.742	263.017	135.816	159.261	190.93	155.629	147.869
ENSG00000077264	19.7379	0.402188	0.181113	2.35447	0.0185491	0.117225	coding	protein_coding	ENSG00000077264	PAK3	13.5241	3.22563	4.03066	52.9134	6.25276	39.6091	6.69009	29.9367	59.7035	3.49138	40.4559	20.5498	3.22244	3.76523	8.69818
ENSG00000077274	0						coding	protein_coding	ENSG00000077274	CAPN6	0	0	0	0	0	0	0	0	0	0	0	0	0	0	0
ENSG00000077279	0.114166	0	0.0419945	0	1		coding	protein_coding	ENSG00000077279	DCX	0	0	0	0	0	0	0	0	0	0	0	1.71248	0	0	0
ENSG00000077312	620.192	-0.430782	0.133564	-3.22555	0.00125733	0.0154188	coding	protein_coding	ENSG00000077312	SNRPA	719.368	677.383	758.772	531.435	498.136	520.419	656.298	560.634	542.6	549.31	517.258	786.887	567.955	689.036	727.385
ENSG00000077327	0.105544	-0.0159719	0.0420046	-0.330867	0.740745		coding	protein_coding	ENSG00000077327	SPAG6	0.575494	0	1.00767	0	0	0	0	0	0	0	0	0	0	0	0
ENSG00000077348	71.826	-0.0198663	0.196214	-0.112432	0.910481	0.974962	coding	protein_coding	ENSG00000077348	EXOSC5	57.8372	61.287	76.5825	59.8152	51.4115	80.3184	70.9149	83.46	87.7993	57.0258	75.1324	92.4742	63.6432	64.0088	95.68
ENSG00000077380	239.36	0.0835158	0.14672	0.567819	0.570158	0.828595	coding	protein_coding	ENSG00000077380	DYNC1I2	244.585	210.741	211.61	293.324	199.393	227.752	242.85	197.764	215.986	288.621	294.75	238.035	277.935	220.893	226.153
ENSG00000077420	21.7033	-0.336979	0.220568	-1.53078	0.125823	0.395372	coding	protein_coding	ENSG00000077420	APBB1IP	25.034	27.9555	22.1686	24.1561	15.2845	12.1028	17.3942	22.6794	21.0718	16.2931	28.8971	16.2686	27.3907	23.8464	25.0073
ENSG00000077454	81.1937	0.0151136	0.187316	0.0811777	0.935301	0.984759	coding	protein_coding	ENSG00000077454	LRCH4	74.2387	73.1143	93.7129	95.4742	70.8646	78.1179	86.9711	60.7807	98.3352	76.8103	69.353	48.8058	83.7835	96.6408	110.902
ENSG00000077458	56.9413	0.0366157	0.22606	0.161159	0.871969	0.962654	coding	protein_coding	ENSG00000077458	FAM76B	52.0822	61.287	36.2759	56.3643	51.4115	49.5114	32.1124	27.2152	82.5314	46.5517	118.478	103.605	65.2544	30.1218	41.3164
ENSG00000077463	33.7583	0.162762	0.219121	0.735948	0.461762	0.755833	coding	protein_coding	ENSG00000077463	SIRT6	39.1336	27.9555	17.1303	29.9076	40.9903	33.0076	29.4364	42.6372	45.6556	50.0431	28.8971	46.2371	22.5571	28.8667	23.92
ENSG00000077498	0						coding	protein_coding	ENSG00000077498	TYR	0	0	0	0	0	0	0	0	0	0	0	0	0	0	0
ENSG00000077514	191.069	-0.532013	0.160982	-3.31046	0.000931423	0.01219	coding	protein_coding	ENSG00000077514	POLD3	204.588	184.936	272.07	140.336	151.456	134.231	181.301	177.806	238.814	188.534	173.382	172.105	195.763	183.241	267.469
ENSG00000077522	0.0463167	0.0111095	0.0419558	0.30069	0.763651		coding	protein_coding	ENSG00000077522	ACTN2	0	0	0	0	0.694751	0	0	0	0	0	0	0	0	0	0
ENSG00000077549	761.001	0.00368363	0.0870845	0.0423674	0.966206	0.993039	coding	protein_coding	ENSG00000077549	CAPZB	786.988	703.188	783.963	745.389	801.742	734.969	729.219	773.819	760.342	769.267	878.471	706.4	705.714	734.219	801.32
ENSG00000077585	38.4068	0.427079	0.216301	1.99144	0.0464324	0.216944	coding	protein_coding	ENSG00000077585	GPR137B	22.1565	37.6324	27.207	49.4626	45.1588	39.6091	44.1546	26.308	38.6317	27.931	60.6839	48.8058	29.8076	42.6726	35.88
ENSG00000077616	0.0537073	0	0.0419558	0	1		coding	protein_coding	ENSG00000077616	NAALAD2	0	0	0	0	0	0	0	0	0	0	0	0	0.80561	0	0
ENSG00000077684	557.812	-0.208872	0.0958882	-2.17807	0.0294008	0.160598	coding	protein_coding	ENSG00000077684	JADE1	574.919	683.834	556.231	550.99	480.073	527.021	575.347	555.191	600.547	588.879	531.706	538.576	569.566	530.897	503.407
ENSG00000077713	104.381	0.0271921	0.1642	0.166773	0.867549	0.961793	coding	protein_coding	ENSG00000077713	SLC25A43	115.387	117.198	78.5979	88.5725	124.36	105.624	94.3302	89.8102	91.3113	112.888	124.257	107.887	99.09	97.8959	118.513
ENSG00000077721	367.007	-0.0329382	0.0931145	-0.351468	0.725237	0.905737	coding	protein_coding	ENSG00000077721	UBE2A	403.134	359.12	382.913	345.088	389.06	388.389	341.863	367.405	377.537	344.483	355.434	327.941	393.943	376.523	352.276
ENSG00000077782	732.565	-0.0566208	0.131183	-0.429474	0.667578	0.880211	coding	protein_coding	ENSG00000077782	FGFR1	930.862	842.965	675.136	827.06	791.321	733.868	718.515	768.376	570.696	545.819	647.295	679.856	694.436	860.982	701.291
ENSG00000077800	0						coding	protein_coding	ENSG00000077800	FKBP6	0	0	0	0	0	0	0	0	0	0	0	0	0	0	0
ENSG00000077809	1247.9	-0.547488	0.0877486	-6.23805	4.43052e-10	3.01297e-08	coding	protein_coding	ENSG00000077809	GTF2I	1487.08	1570.88	1447.01	866.17	1088.67	1072.75	1199.53	1154.83	1280.11	1059.05	1135.66	1151.65	1413.85	1482.24	1309.08
ENSG00000077935	1.6892	0.0230584	0.139208	0.161753	0.871501		coding	protein_coding	ENSG00000077935	SMC1B	0.575494	0	2.01533	1.15029	0.694751	1.10025	2.00703	0	1.75599	1.16379	5.77942	1.71248	1.61122	2.51015	3.26182
ENSG00000077942	166.613	0.0630089	0.166101	0.378904	0.704759	0.897798	coding	protein_coding	ENSG00000077942	FBLN1	189.338	152.68	139.058	139.185	190.362	180.441	147.182	167.827	175.599	183.879	144.485	134.43	154.677	227.169	172.876
ENSG00000077943	0.535768	0.0110642	0.0674388	0.178493	0.858336		coding	protein_coding	ENSG00000077943	ITGA8	0.287747	0	1.00767	1.15029	0.694751	0	0	2.72152	0	0	0	0	0	0	2.17455
ENSG00000077984	0.0570828	0	0.0419558	0	1		coding	protein_coding	ENSG00000077984	CST7	0	0	0	0	0	0	0	0	0	0	0	0.856242	0	0	0
ENSG00000078018	53.0642	0.402166	0.223929	1.81244	0.069918	0.280086	coding	protein_coding	ENSG00000078018	MAP2	31.3644	49.4597	37.2836	46.0117	65.3066	79.2182	44.8236	97.0676	38.6317	67.5	78.0221	35.9622	45.9198	48.9479	30.4436
ENSG00000078043	106.061	0.0540964	0.190599	0.28289	0.777261	0.927558	coding	protein_coding	ENSG00000078043	PIAS2	109.056	83.8664	105.805	140.336	81.9806	95.722	133.802	80.7385	114.139	109.396	147.375	156.692	79.7554	81.5799	70.6727
ENSG00000078053	0.0671777	-0.00547692	0.0419576	-0.164204	0.86957		coding	protein_coding	ENSG00000078053	AMPH	0	0	1.00767	0	0	0	0	0	0	0	0	0	0	0	0
ENSG00000078061	201.666	-0.0516166	0.141985	-0.36446	0.715515	0.902281	coding	protein_coding	ENSG00000078061	ARAF	217.249	179.56	206.571	207.053	215.373	158.436	208.731	250.38	191.403	195.517	156.044	154.124	222.348	244.74	217.455
ENSG00000078070	59.6631	-0.398142	0.219732	-1.81274	0.0698715	0.280057	coding	protein_coding	ENSG00000078070	MCCC1	62.4411	92.4681	66.5059	43.7111	49.3273	47.3109	62.2178	81.6457	31.6078	60.5172	31.7868	35.9622	82.9778	46.4378	100.029
ENSG00000078081	1.7291	-0.0481899	0.112305	-0.482077	0.629751		coding	protein_coding	ENSG00000078081	LAMP3	1.15099	1.07521	4.03066	1.15029	2.08425	0	6.02108	0	0	1.16379	0	2.56873	0	1.25508	5.43636
ENSG00000078098	0.289786	0.0242792	0.0441666	0.465803	0.641356		coding	protein_coding	ENSG00000078098	FAP	0.287747	0	0	0	0.694751	2.20051	0	0	0	1.16379	0	0	0	0	0
ENSG00000078114	191.865	-0.234417	0.211134	-1.1256	0.260334	0.580723	coding	protein_coding	ENSG00000078114	NEBL	198.545	229.02	158.203	181.746	127.139	151.835	262.251	132.447	172.087	283.965	112.699	253.448	176.429	170.69	267.469
ENSG00000078124	250.682	-0.0811646	0.204726	-0.395732	0.692303	0.892118	coding	protein_coding	ENSG00000078124	ACER3	269.907	284.931	236.801	219.706	252.194	259.66	298.378	160.57	247.594	425.948	167.603	257.729	231.21	284.902	163.091
ENSG00000078140	352.223	-0.0463665	0.122801	-0.378591	0.704991	0.897853	coding	protein_coding	ENSG00000078140	UBE2K	365.439	345.143	341.598	314.03	336.954	367.484	335.842	341.097	367.001	367.758	286.081	415.278	318.216	420.45	360.975
ENSG00000078142	131.753	0.00741472	0.226306	0.0325128	0.974063	0.995161	coding	protein_coding	ENSG00000078142	PIK3C3	80.2814	182.786	99.7588	144.937	93.7913	126.529	128.45	125.19	96.5792	174.569	75.1324	102.749	122.453	342.636	80.4582
ENSG00000078177	74.1346	-0.247761	0.191171	-1.30339	0.192442	0.500338	coding	protein_coding	ENSG00000078177	N4BP2	67.9083	87.0921	83.6362	55.214	65.3066	67.1154	77.605	50.8017	79.0194	100.086	86.6912	83.0555	91.0339	65.2639	52.1891
ENSG00000078237	84.8665	0.605588	0.220945	2.45725	0.0140004	0.0955751	coding	protein_coding	ENSG00000078237	C12orf5	77.1162	58.0614	68.5212	424.458	63.2223	46.2106	59.5418	61.6878	68.4835	52.3707	57.7942	44.5246	75.7274	65.2639	50.0145
ENSG00000078246	142.165	-0.281544	0.139097	-2.01615	0.0437847	0.209886	coding	protein_coding	ENSG00000078246	TULP3	171.785	169.883	150.142	140.336	137.561	118.827	112.393	132.447	151.015	128.017	130.037	150.699	159.511	133.038	146.782
ENSG00000078269	482.723	0.628363	0.177406	3.53925	0.000401262	0.00607352	coding	protein_coding	ENSG00000078269	SYNJ2	348.749	415.031	346.637	548.689	780.205	565.53	489.714	451.773	577.719	501.595	572.162	309.96	335.939	464.378	532.764
ENSG00000078295	8.86211	0.153045	0.140064	1.75168			coding	protein_coding	ENSG00000078295	ADCY2	2.30198	1.07521	1.00767	1.15029	1.3895	23.1053	3.34504	0.907174	1.75599	2.32758	0	2.56873	3.22244	86.6002	2.17455
ENSG00000078304	527.515	-0.211003	0.0964491	-2.18533	0.0288646	0.158767	coding	protein_coding	ENSG00000078304	PPP2R5C	608.297	573.087	597.545	541.788	510.642	476.409	545.911	538.861	454.8	514.396	456.574	546.283	523.647	465.633	558.858
ENSG00000078319	15.0687	-0.252764	0.187872	-1.39001	0.164524	0.460856	pseudo	pseudogene	ENSG00000078319	PMS2P1	22.4443	33.3315	7.05366	3.45088	18.7583	4.40101	27.4294	15.422	7.02395	9.31034	11.5588	24.831	29.8076	2.51015	8.69818
ENSG00000078328	0.0446006	0	0.0419558	0	1		coding	protein_coding	ENSG00000078328	RBFOX1	0	0	0	0	0	0	0.669009	0	0	0	0	0	0	0	0
ENSG00000078369	1222.5	-0.107612	0.105529	-1.01987	0.307791	0.629263	coding	protein_coding	ENSG00000078369	GNB1	1338.89	1291.33	1132.62	1214.71	1281.81	980.325	1277.14	1098.59	1267.82	1138.19	1329.27	1209.01	1175.39	1272.65	1329.73
ENSG00000078399	1.51248	0.0588086	0.11619	0.685628	0.492948		coding	protein_coding	ENSG00000078399	HOXA9	0.575494	1.07521	0	0	3.47375	0	2.67603	3.6287	1.75599	0	5.77942	0.856242	1.61122	1.25508	0
ENSG00000078401	332.643	-0.291795	0.0933828	-3.12402	0.001784	0.0203499	coding	protein_coding	ENSG00000078401	EDN1	368.604	344.067	380.897	318.631	289.016	280.564	325.807	338.376	309.054	302.586	343.875	309.96	377.026	348.911	352.276
ENSG00000078403	221.559	-0.030592	0.184904	-0.163448	0.870166	0.962136	coding	protein_coding	ENSG00000078403	MLLT10	209.48	316.112	190.449	224.307	227.183	243.156	243.519	229.515	163.307	313.06	236.956	224.335	222.348	131.783	147.869
ENSG00000078487	6.51562	0.0629687	0.197833	0.311839	0.755163	0.919579	coding	protein_coding	ENSG00000078487	ZCWPW1	10.6466	3.22563	3.023	6.90175	6.25276	8.80202	8.0281	7.25739	7.02395	4.65517	2.88971	10.2749	4.02805	12.5508	2.17455
ENSG00000078549	0						coding	protein_coding	ENSG00000078549	ADCYAP1R1	0	0	0	0	0	0	0	0	0	0	0	0	0	0	0
ENSG00000078579	0						coding	protein_coding	ENSG00000078579	FGF20	0	0	0	0	0	0	0	0	0	0	0	0	0	0	0
ENSG00000078589	0						coding	protein_coding	ENSG00000078589	P2RY10	0	0	0	0	0	0	0	0	0	0	0	0	0	0	0
ENSG00000078596	0						coding	protein_coding	ENSG00000078596	ITM2A	0	0	0	0	0	0	0	0	0	0	0	0	0	0	0
ENSG00000078618	635.245	-0.0093339	0.11358	-0.0812672	0.935229	0.984759	coding	protein_coding	ENSG00000078618	NRD1	631.893	735.444	628.783	602.753	641.255	734.969	652.952	644.094	560.16	548.146	635.736	657.594	693.63	537.172	624.095
ENSG00000078668	457.45	-0.00695033	0.1	-0.06937	0.944695	0.988093	coding	protein_coding	ENSG00000078668	VDAC3	480.825	425.783	462.518	463.568	453.672	451.104	432.18	435.444	433.729	388.707	520.147	462.371	445.502	532.152	474.051
ENSG00000078674	704.976	-0.495015	0.19117	-2.59685	0.0094083	0.0723203	coding	protein_coding	ENSG00000078674	PCM1	572.617	1106.39	826.285	495.776	405.04	697.56	553.27	695.803	746.294	737.844	901.589	856.242	822.528	695.312	462.091
ENSG00000078687	92.698	-0.325895	0.219335	-1.52043	0.128404	0.400396	coding	protein_coding	ENSG00000078687	TNRC6C	107.617	70.9639	112.858	92.0234	49.3273	61.6141	124.436	139.705	77.2634	58.1896	49.125	111.311	74.1161	129.273	132.647
ENSG00000078699	115.345	0.153234	0.217605	0.706016	0.480178	0.768107	coding	protein_coding	ENSG00000078699	CBFA2T2	113.085	97.8442	91.6975	59.8152	141.729	156.236	114.4	107.047	159.795	62.8448	153.155	142.136	95.062	125.508	109.815
ENSG00000078725	42.0585	0.472297	0.220745	2.16526	0.0303681	0.163928	coding	protein_coding	ENSG00000078725	BRINP1	29.3502	34.4067	19.1456	52.9134	59.0538	30.8071	48.1686	32.6583	80.7754	50.0431	43.3456	35.9622	35.4468	36.3972	42.4036
ENSG00000078747	432.889	0.282152	0.153598	1.83601	0.0663566	0.27101	coding	protein_coding	ENSG00000078747	ITCH	434.21	395.678	375.859	465.868	508.557	539.124	409.433	417.3	310.81	550.474	343.875	378.459	448.725	540.937	374.022
ENSG00000078795	9.46415	0.158501	0.221591	0.702822	0.482167	0.770089	coding	protein_coding	ENSG00000078795	PKD2L2	8.63241	7.52647	13.0996	10.3526	13.895	13.203	14.0492	3.6287	8.77993	10.4741	5.77942	9.41867	5.63927	8.78553	8.69818
ENSG00000078804	70.2824	0.555094	0.164814	3.3673	0.000759081	0.0102751	coding	protein_coding	ENSG00000078804	TP53INP2	57.5494	60.2118	65.4982	94.324	89.6228	103.424	78.943	83.46	61.4595	64.0086	63.5736	70.2119	45.9198	62.7538	53.2764
ENSG00000078808	359.151	0.260972	0.105794	2.46712	0.0136206	0.0937025	coding	protein_coding	ENSG00000078808	SDF4	336.089	286.006	357.721	441.712	372.386	380.687	356.582	369.22	344.173	360.776	390.111	349.347	319.022	352.676	370.76
ENSG00000078814	19.2889	-0.0966282	0.222916	-0.445275	0.656121	0.875711	coding	protein_coding	ENSG00000078814	MYH7B	16.4016	20.429	23.1763	13.8035	18.0635	19.8045	18.7322	19.9578	29.8518	22.1121	11.5588	18.8373	22.5571	18.8261	15.2218
ENSG00000078898	0						coding	protein_coding	ENSG00000078898	BPIFB2	0	0	0	0	0	0	0	0	0	0	0	0	0	0	0
ENSG00000078900	3.84566	0.249512	0.174871	1.75384	0.0794573		coding	protein_coding	ENSG00000078900	TP73	1.72648	0	1.00767	2.30058	8.33701	1.10025	10.0351	5.44304	8.77993	4.65517	0	5.13745	3.22244	3.76523	2.17455
ENSG00000078902	105.497	0.203932	0.173008	1.17789	0.238841	0.558896	coding	protein_coding	ENSG00000078902	TOLLIP	80.8569	91.3929	97.7435	100.075	106.297	111.126	104.365	128.819	115.895	151.293	86.6912	85.6242	107.952	106.681	107.64
ENSG00000078967	74.3492	0.0443161	0.218567	0.195252	0.845196	0.953319	coding	protein_coding	ENSG00000078967	UBE2D4	73.0878	61.287	44.3373	47.162	63.9171	78.1179	100.351	91.6246	56.1916	77.9741	89.5809	41.0996	105.535	122.997	61.9745
ENSG00000079101	0.167343	0	0.0419945	0	1		coding	protein_coding	ENSG00000079101	CLUL1	0	0	0	0	0	0	0	0	0	0	0	0	0	2.51015	0
ENSG00000079102	0						coding	protein_coding	ENSG00000079102	RUNX1T1	0	0	0	0	0	0	0	0	0	0	0	0	0	0	0
ENSG00000079112	28.8999	0.519499	0.216526	2.39165	0.016773	0.108856	coding	protein_coding	ENSG00000079112	CDH17	25.6095	21.5042	17.1303	51.7631	32.6533	31.9073	36.1265	24.4937	31.6078	27.931	14.4485	29.1122	27.3907	31.3769	30.4436
ENSG00000079134	111.233	-0.388789	0.167663	-2.3323	0.0196847	0.122176	coding	protein_coding	ENSG00000079134	THOC1	111.934	134.401	105.805	89.7228	88.9281	73.7169	97.6753	94.3461	117.651	123.362	158.934	100.18	135.343	134.293	102.204
ENSG00000079150	49.1591	-0.245136	0.204732	-1.18976	0.234142	0.554241	coding	protein_coding	ENSG00000079150	FKBP7	54.9597	52.6853	64.4906	37.9596	56.9696	38.5088	46.1616	58.0591	31.6078	60.5172	26.0074	43.6684	54.7815	57.7335	53.2764
ENSG00000079156	24.8856	0.32641	0.220825	1.48534	0.137453	0.416587	coding	protein_coding	ENSG00000079156	OSBPL6	18.4158	15.0529	16.1226	28.7573	15.9793	30.8071	28.0984	16.3291	28.0958	26.7672	31.7868	34.2497	28.1964	26.3566	28.2691
ENSG00000079215	0						coding	protein_coding	ENSG00000079215	SLC1A3	0	0	0	0	0	0	0	0	0	0	0	0	0	0	0
ENSG00000079246	1338.48	-0.00326982	0.0716247	-0.0458578	0.963424	0.992275	coding	protein_coding	ENSG00000079246	XRCC5	1386.08	1266.6	1324.07	1223.91	1358.93	1390.72	1309.92	1338.99	1236.21	1450.09	1300.37	1331.46	1333.28	1371.8	1454.77
ENSG00000079257	59.2021	0.600908	0.190447	3.15733	0.00159221	0.0186103	coding	protein_coding	ENSG00000079257	LXN	44.3131	37.6324	42.3219	58.6649	71.5593	85.8197	72.9219	76.2026	66.7275	77.9741	31.7868	60.7932	51.559	56.4784	53.2764
ENSG00000079263	0.0733502	0.0111095	0.0419558	0.30069	0.763651		coding	protein_coding	ENSG00000079263	SP140	0	0	0	0	0	1.10025	0	0	0	0	0	0	0	0	0
ENSG00000079277	60.2991	-0.204406	0.221885	-0.942788	0.345789	0.666491	coding	protein_coding	ENSG00000079277	MKNK1	64.1676	55.911	63.4829	52.9134	53.4958	37.4086	55.5277	48.0802	100.091	68.6638	23.1177	95.0429	55.5871	52.7132	78.2836
ENSG00000079308	131.864	-0.425292	0.198591	-2.12457	0.0336222	0.175604	coding	protein_coding	ENSG00000079308	TNS1	190.776	140.853	179.364	104.677	138.95	100.123	128.45	166.013	145.747	88.4482	75.1324	174.673	102.312	138.058	104.378
ENSG00000079313	138.099	-0.0642771	0.200845	-0.318663	0.749982	0.917104	coding	protein_coding	ENSG00000079313	REXO1	186.748	127.95	112.858	115.029	117.413	174.94	127.781	195.95	154.527	133.836	92.4706	102.749	147.427	99.1509	182.662
ENSG00000079332	585.26	-0.108885	0.106395	-1.02408	0.3058	0.626634	coding	protein_coding	ENSG00000079332	SAR1A	595.349	620.397	577.392	620.007	548.853	486.312	667.671	565.169	558.404	557.457	598.169	545.426	686.38	564.784	587.127
ENSG00000079335	18.602	-0.0473133	0.226197	-0.221536	0.824675	0.947369	coding	protein_coding	ENSG00000079335	CDC14A	16.4016	23.6546	14.1073	17.2544	18.0635	14.3033	14.0492	41.73	15.8039	19.7845	17.3382	17.1248	13.6954	15.0609	20.6582
ENSG00000079337	4.14466	-0.296527	0.154806	-1.76702	0.0772256		coding	protein_coding	ENSG00000079337	RAPGEF3	1.72648	10.7521	14.1073	1.15029	3.47375	1.10025	2.67603	0	0	5.81896	0	7.70618	1.61122	8.78553	3.26182
ENSG00000079385	11.8707	0.569908	0.213106	2.55901	0.0104972	0.0782774	coding	protein_coding	ENSG00000079385	CEACAM1	8.63241	4.30084	7.05366	11.5029	12.5055	41.8096	9.36612	8.16457	0	16.2931	14.4485	16.2686	8.0561	8.78553	10.8727
ENSG00000079387	217.656	-0.262689	0.158866	-1.65778	0.0973614	0.342185	coding	protein_coding	ENSG00000079387	SENP1	227.608	204.29	251.916	179.446	175.772	198.045	163.238	196.857	226.522	275.819	216.728	159.261	277.13	244.74	267.469
ENSG00000079393	0						coding	protein_coding	ENSG00000079393	DUSP13	0	0	0	0	0	0	0	0	0	0	0	0	0	0	0
ENSG00000079432	443.947	-0.179774	0.156213	-1.14858	0.250728	0.570358	coding	protein_coding	ENSG00000079432	CIC	498.666	505.349	479.649	379.596	360.576	546.826	534.538	446.33	502.212	320.043	283.191	350.203	503.506	588.63	359.887
ENSG00000079435	11.7728	0.0243548	0.198037	0.120224	0.904306	0.973683	coding	protein_coding	ENSG00000079435	LIPE	10.0711	18.2786	9.06899	9.20234	18.7583	11.0025	11.3731	11.7933	12.2919	16.2931	2.88971	1.71248	10.4729	30.1218	3.26182
ENSG00000079459	302.045	-0.0470567	0.124391	-0.377686	0.705664	0.898262	coding	protein_coding	ENSG00000079459	FDFT1	314.22	261.276	352.683	297.926	320.975	276.163	274.963	254.009	263.398	307.241	314.978	315.097	298.881	385.308	293.564
ENSG00000079462	127.855	0.182424	0.160134	1.1397	0.25441	0.574585	coding	protein_coding	ENSG00000079462	PAFAH1B3	123.443	110.747	117.897	169.093	114.634	129.83	126.443	89.8102	121.163	98.9224	115.588	118.161	148.232	179.476	154.393
ENSG00000079482	182.926	0.21089	0.219414	0.985311	0.324471	0.645807	coding	protein_coding	ENSG00000079482	OPHN1	150.204	124.724	103.79	175.995	152.15	156.236	123.767	127.004	335.393	251.379	413.228	171.248	139.371	176.966	142.433
ENSG00000079557	0.118802	0.0105724	0.0419945	0.300687	0.763653		coding	protein_coding	ENSG00000079557	AFM	0	0	0	0	0.694751	0	0	0	0	0	0	0	0	0	1.08727
ENSG00000079616	287.828	-0.292742	0.16595	-1.76013	0.0783854	0.299567	coding	protein_coding	ENSG00000079616	KIF22	403.134	247.298	340.591	331.284	220.931	234.354	317.779	244.03	251.106	257.198	208.059	211.492	375.414	330.085	344.665
ENSG00000079689	0.346343	0.00360364	0.0542806	0.0400581	0.968047		coding	protein_coding	ENSG00000079689	SCGN	0.575494	0	0	0	0	1.10025	0	0.907174	1.75599	0	0	0.856242	0	0	0
ENSG00000079691	251.838	0.242266	0.14415	1.68152	0.0926619	0.331906	coding	protein_coding	ENSG00000079691	LRRC16A	241.42	247.298	237.809	369.244	266.09	245.356	248.871	234.051	230.034	282.802	187.831	286.841	240.072	227.169	232.676
ENSG00000079739	232.689	0.157431	0.124532	1.26428	0.206128	0.520188	coding	protein_coding	ENSG00000079739	PGM1	225.018	212.892	221.686	210.503	266.09	265.161	199.365	259.452	228.278	226.94	242.735	221.767	227.182	223.403	259.858
ENSG00000079785	433.371	-0.155131	0.14935	-1.03951	0.298568	0.620493	coding	protein_coding	ENSG00000079785	DDX1	539.526	338.691	464.534	391.099	380.723	423.597	493.728	397.342	496.944	513.232	378.552	368.184	450.336	453.082	410.989
ENSG00000079805	347.489	0.115861	0.140865	0.822325	0.410892	0.719477	coding	protein_coding	ENSG00000079805	DNM2	323.428	377.399	286.177	356.591	423.103	294.868	343.201	356.519	391.585	346.81	430.566	297.116	319.827	347.656	317.484
ENSG00000079819	697.863	-0.647054	0.101315	-6.38043	1.76586e-10	1.26122e-08	coding	protein_coding	ENSG00000079819	EPB41L2	924.531	925.756	906.899	534.886	621.802	556.728	677.706	696.71	672.543	552.801	606.839	744.075	728.272	687.781	630.618
ENSG00000079841	0.216826	0.0055727	0.0420451	0.128725	0.897576		coding	protein_coding	ENSG00000079841	RIMS1	0.287747	0	0	1.15029	0	0	0	1.81435	0	0	0	0	0	0	0
ENSG00000079931	24.3835	0.139967	0.213428	0.656811	0.511302	0.791658	coding	protein_coding	ENSG00000079931	MOXD1	24.1708	20.429	22.1686	31.0579	22.9268	25.3058	16.0562	23.5865	21.0718	26.7672	31.7868	32.5372	24.9739	20.0812	22.8327
ENSG00000079950	117.351	0.0874748	0.184276	0.472712	0.636419	0.865259	coding	protein_coding	ENSG00000079950	STX7	101.862	99.9946	114.874	103.526	115.329	122.128	102.358	115.211	80.7754	86.1206	179.162	136.999	164.344	117.977	119.6
ENSG00000079974	91.0166	-0.300745	0.178343	-1.69393	0.0902795	0.326862	coding	protein_coding	ENSG00000079974	RABL2B	108.768	84.9416	96.7358	67.8672	83.3701	73.7169	105.034	127.004	79.0194	79.1379	60.6839	96.7554	87.8115	99.1509	115.251
ENSG00000079999	146.55	-0.105505	0.152228	-0.692255	0.488777	0.775334	coding	protein_coding	ENSG00000079999	KEAP1	162.289	141.928	150.142	161.041	127.139	134.231	128.45	117.933	151.015	109.396	170.493	155.836	153.066	181.986	153.305
ENSG00000080007	0						coding	protein_coding	ENSG00000080007	DDX43	0	0	0	0	0	0	0	0	0	0	0	0	0	0	0
ENSG00000080031	21.2931	0.539333	0.1911	2.97864	0.00289528	0.02996	coding	protein_coding	ENSG00000080031	PTPRH	4.60395	15.0529	3.023	32.2082	72.2541	19.8045	15.3872	28.1224	14.0479	41.8965	5.77942	8.56242	32.2244	2.51015	23.92
ENSG00000080166	0.230058	0.0265927	0.0420288	0.668449	0.503847		coding	protein_coding	ENSG00000080166	DCT	0	0	0	3.45088	0	0	0	0	0	0	0	0	0	0	0
ENSG00000080189	123.425	-0.016643	0.179004	-0.0956348	0.923811	0.980076	coding	protein_coding	ENSG00000080189	SLC35C2	119.127	129.025	107.82	116.18	134.782	97.9225	141.161	133.355	163.307	116.379	124.257	138.711	91.0339	82.835	155.48
ENSG00000080200	61.934	0.292889	0.215328	1.36317	0.17283	0.470758	coding	protein_coding	ENSG00000080200	CRYBG3	39.1336	52.6853	68.5212	52.9134	92.4018	68.2157	57.5347	67.1309	38.6317	67.5	57.7942	95.8991	74.1161	38.9073	57.6255
ENSG00000080224	0.211041	-0.0065811	0.0420316	-0.195491	0.845009		coding	protein_coding	ENSG00000080224	EPHA6	0	0	2.01533	1.15029	0	0	0	0	0	0	0	0	0	0	0
ENSG00000080293	0						coding	protein_coding	ENSG00000080293	SCTR	0	0	0	0	0	0	0	0	0	0	0	0	0	0	0
ENSG00000080298	28.2334	-0.426464	0.224467	-1.80208	0.0715325	0.284268	coding	protein_coding	ENSG00000080298	RFX3	25.6095	46.2341	61.4676	12.6532	28.4848	27.5063	37.4645	14.5148	61.4595	13.9655	11.5588	15.4124	24.1683	28.8667	14.1345
ENSG00000080345	300.21	-0.142627	0.187021	-0.770478	0.441016	0.741461	coding	protein_coding	ENSG00000080345	RIF1	239.981	297.833	308.346	213.954	243.163	284.965	278.308	342.912	358.221	485.301	213.838	303.11	379.442	254.78	299
ENSG00000080371	385.924	-0.312259	0.114127	-2.73878	0.00616678	0.0532379	coding	protein_coding	ENSG00000080371	RAB21	452.338	390.301	374.851	353.14	327.922	290.467	427.497	378.292	477.628	416.638	413.228	368.184	370.581	396.604	351.189
ENSG00000080493	74.1468	0.850539	0.185588	4.60183	4.18785e-06	0.000120734	coding	protein_coding	ENSG00000080493	SLC4A4	40.5723	43.0084	42.3219	74.769	95.1808	96.8222	95.6682	64.4094	80.7754	77.9741	118.478	71.0681	78.1442	67.7741	65.2364
ENSG00000080503	247.097	-0.652988	0.175934	-3.73681	0.000186373	0.00317617	coding	protein_coding	ENSG00000080503	SMARCA2	299.832	248.374	277.108	196.7	133.392	144.133	312.427	274.874	226.522	215.302	283.191	193.511	335.134	353.931	212.018
ENSG00000080511	0.117066	0	0.0419558	0	1		coding	protein_coding	ENSG00000080511	RDH8	0	0	0	0	0	0	0	0	1.75599	0	0	0	0	0	0
ENSG00000080546	33.5516	-0.246455	0.225749	-1.09995	0.271355	0.591619	coding	protein_coding	ENSG00000080546	SESN1	40.8601	36.5572	36.2759	17.2544	38.2113	22.0051	28.0984	58.0591	14.0479	29.0948	75.1324	29.9685	30.6132	18.8261	28.2691
ENSG00000080561	47.9391	-0.000645734	0.22094	-0.00587103	0.995316	0.998618	coding	protein_coding	ENSG00000080561	MID2	40.8601	64.5126	31.2376	31.0579	50.7168	52.8121	34.1194	51.7089	36.8757	80.3017	60.6839	39.3871	34.6412	51.4581	58.7127
ENSG00000080572	0.140754	0	0.0419945	0	1		coding	protein_coding	ENSG00000080572	PIH1D3	0	0	0	0	0	0	0	0	0	0	0	0.856242	0	1.25508	0
ENSG00000080573	3.6194	0.274073	0.164448	1.62241	0.104716		coding	protein_coding	ENSG00000080573	COL5A3	2.30198	2.15042	1.00767	2.30058	7.64226	8.80202	2.67603	16.3291	3.51197	1.16379	0	3.42497	0.80561	0	2.17455
ENSG00000080603	934.125	0.216474	0.087558	2.47277	0.0134071	0.0926372	coding	protein_coding	ENSG00000080603	SRCAP	924.244	885.974	849.462	992.702	1006.69	1117.86	901.824	947.997	1062.37	780.905	655.964	781.749	968.343	1100.7	1035.08
ENSG00000080608	488.276	-0.108435	0.123095	-0.881726	0.377925	0.69309	coding	protein_coding	ENSG00000080608	KIAA0020	498.953	422.558	562.277	449.764	477.988	439.001	490.383	461.752	509.236	465.517	583.721	482.921	509.146	561.019	409.902
ENSG00000080618	0.174149	0	0.0419945	0	1		coding	protein_coding	ENSG00000080618	CPB2	0	0	0	0	0	0	0	0	1.75599	0	0	0.856242	0	0	0
ENSG00000080644	1.30085	0.0155987	0.107678	0.127919	0.898213		coding	protein_coding	ENSG00000080644	CHRNA3	0.575494	1.07521	3.023	2.30058	2.779	0	0	1.81435	0	0	0	2.56873	1.61122	3.76523	0
ENSG00000080709	1.29063	-0.0305129	0.11163	-0.281196	0.77856		coding	protein_coding	ENSG00000080709	KCNN2	0.575494	2.15042	2.01533	2.30058	0	1.10025	2.67603	0.907174	0	2.32758	2.88971	0	2.41683	0	0
ENSG00000080802	204.948	0.0674582	0.167924	0.399402	0.689597	0.890397	coding	protein_coding	ENSG00000080802	CNOT4	191.927	161.282	200.525	201.301	218.846	165.038	251.547	227.701	235.302	202.5	179.162	300.541	191.735	138.058	208.756
ENSG00000080815	361.628	0.242726	0.153691	1.57886	0.114368	0.376101	coding	protein_coding	ENSG00000080815	PSEN1	366.302	338.691	294.238	395.7	404.345	416.996	309.751	393.714	295.006	354.957	575.052	352.772	310.966	272.351	343.578
ENSG00000080819	102.195	0.405191	0.183607	2.20515	0.0274435	0.153989	coding	protein_coding	ENSG00000080819	CPOX	95.532	90.3177	79.6055	173.694	105.602	103.424	101.689	114.304	105.359	115.215	69.353	107.887	94.2564	101.661	75.0218
ENSG00000080822	124.963	0.206224	0.160528	1.28703	0.198083	0.508857	coding	protein_coding	ENSG00000080822	CLDND1	130.925	117.198	110.843	159.891	110.465	161.737	108.379	118.84	114.139	157.112	98.2501	142.136	111.98	112.957	119.6
ENSG00000080823	89.7334	0.391604	0.195052	2.00581	0.0448767	0.212982	coding	protein_coding	ENSG00000080823	MOK	67.0451	93.5433	77.5902	141.486	110.465	85.8197	85.6331	95.2533	54.4356	93.1034	72.2427	116.449	77.3386	101.661	73.9345
ENSG00000080824	9091.38	0.448091	0.0468883	9.55655	1.21753e-21	3.26505e-19	coding	protein_coding	ENSG00000080824	HSP90AA1	7921.1	7994.19	8129.84	10876	11243.8	10781.4	8278.98	8026.68	8511.27	10205.3	9637.17	10292	8296.98	7730.01	8445.93
ENSG00000080839	247.749	-0.546299	0.169742	-3.20877	0.00133303	0.0161658	coding	protein_coding	ENSG00000080839	RBL1	314.22	365.572	285.169	197.85	228.573	183.742	205.386	251.287	215.986	183.879	231.177	197.792	343.19	327.575	184.836
ENSG00000080845	518.757	0.688488	0.104115	6.61155	3.8032e-11	3.05394e-09	coding	protein_coding	ENSG00000080845	DLGAP4	407.45	372.023	436.319	652.216	624.581	743.771	568.657	538.861	597.035	538.836	479.691	458.946	501.089	404.134	457.742
ENSG00000080854	18.526	-0.270924	0.204452	-1.97195	0.0486148	0.223902	coding	protein_coding	ENSG00000080854	IGSF9B	6.04269	21.5042	15.115	6.90175	4.1685	3.30076	35.4575	36.287	8.77993	8.14655	5.77942	20.5498	55.5871	10.0406	40.2291
ENSG00000080910	0						coding	protein_coding	ENSG00000080910	CFHR2	0	0	0	0	0	0	0	0	0	0	0	0	0	0	0
ENSG00000080947	37.5195	0.000692162	0.221556	0.00447357	0.996431	0.999172	pseudo	pseudogene	ENSG00000080947	CROCCP3	32.8032	52.6853	28.2146	18.4047	22.9268	72.6167	24.7533	50.8017	17.5599	30.2586	95.3604	38.5309	30.6132	20.0812	27.1818
ENSG00000080986	97.1341	-0.401242	0.191833	-2.12457	0.0336222	0.175604	coding	protein_coding	ENSG00000080986	NDC80	88.6261	132.251	77.5902	66.7169	63.2223	74.8172	101.02	92.5318	77.2634	104.741	98.2501	136.999	99.8957	94.1306	148.956
ENSG00000081014	197.204	-0.267298	0.15456	-1.72511	0.0845082	0.313374	coding	protein_coding	ENSG00000081014	AP4E1	238.542	222.569	210.602	163.341	230.657	145.233	159.893	177.806	214.23	183.879	176.272	192.655	204.625	192.026	245.724
ENSG00000081019	47.5528	0.0541383	0.214493	0.247475	0.804541	0.940218	coding	protein_coding	ENSG00000081019	RSBN1	43.7376	44.0836	41.3143	41.4105	43.7693	51.7119	85.6331	31.7511	45.6556	47.7155	34.6765	38.5309	56.3927	51.4581	55.4509
ENSG00000081026	226.106	-0.121358	0.162475	-0.753229	0.451312	0.748047	coding	protein_coding	ENSG00000081026	MAGI3	208.329	260.201	180.372	189.798	163.961	234.354	270.949	244.937	277.446	292.112	228.287	256.873	201.403	234.699	147.869
ENSG00000081041	128.406	-0.0896425	0.142189	-0.617595	0.536842	0.807764	coding	protein_coding	ENSG00000081041	CXCL2	139.27	152.68	149.134	154.139	120.887	137.532	151.865	143.334	180.867	90.7758	75.1324	69.3556	128.898	110.447	121.775
ENSG00000081051	2.79648	-0.00426188	0.122139	-0.072169	0.942467		coding	protein_coding	ENSG00000081051	AFP	1.43874	0	4.03066	0	0.694751	4.40101	0.669009	5.44304	7.02395	0	5.77942	5.13745	0.80561	0	6.52364
ENSG00000081052	30.7482	0.136296	0.211007	0.652975	0.513772	0.792687	coding	protein_coding	ENSG00000081052	COL4A4	31.3644	27.9555	30.23	48.3123	23.6215	34.1078	27.4294	28.1224	33.3637	27.931	26.0074	29.9685	27.3907	33.887	31.5309
ENSG00000081059	149.553	0.745986	0.134495	5.54603	2.92236e-08	1.34419e-06	coding	protein_coding	ENSG00000081059	TCF7	99.5605	110.747	94.7205	188.648	181.33	169.439	150.527	127.004	151.015	169.914	199.39	157.549	158.705	129.273	155.48
ENSG00000081087	90.4902	-0.0505248	0.219327	-0.216959	0.82824	0.948495	coding	protein_coding	ENSG00000081087	OSTM1	147.614	80.6408	97.7435	67.8672	113.939	129.83	62.2178	68.0381	73.7514	104.741	57.7942	86.4805	136.954	51.4581	78.2836
ENSG00000081138	0.410534	-0.0191855	0.0580916	-0.368257	0.712681		coding	protein_coding	ENSG00000081138	CDH7	0.287747	1.07521	0	0	0	0	0	0	0	2.32758	0	0.856242	1.61122	0	0
ENSG00000081148	0.443939	-0.0152616	0.0584359	-0.271629	0.785907		coding	protein_coding	ENSG00000081148	IMPG2	0.863241	1.07521	0	1.15029	0	0	0	1.81435	1.75599	0	0	0	0	0	0
ENSG00000081154	484.494	0.0492313	0.103641	0.476461	0.633746	0.863904	coding	protein_coding	ENSG00000081154	PCNP	490.609	502.123	495.771	559.042	480.767	506.116	403.412	498.039	526.796	475.991	456.574	523.164	448.725	422.96	477.313
ENSG00000081177	108.653	-0.25554	0.16426	-1.55355	0.120292	0.386113	coding	protein_coding	ENSG00000081177	EXD2	128.911	107.521	118.904	89.7228	113.244	84.7194	96.3372	123.376	149.259	104.741	98.2501	97.6116	98.2844	100.406	118.513
ENSG00000081181	5.95083	0.0149732	0.205413	0.0732479	0.941609	0.98707	coding	protein_coding	ENSG00000081181	ARG2	3.45296	8.60169	6.04599	5.75146	6.25276	5.50126	3.34504	5.44304	3.51197	3.49138	8.66912	8.56242	7.25049	2.51015	10.8727
ENSG00000081189	0.357929	0.0107961	0.0454509	0.297213	0.766304		coding	protein_coding	ENSG00000081189	MEF2C	0	0	1.00767	2.30058	0	0	0	0	0	0	0	0	0.80561	1.25508	0
ENSG00000081237	0.133802	0	0.0420288	0	1		coding	protein_coding	ENSG00000081237	PTPRC	0	0	0	0	0	0	2.00703	0	0	0	0	0	0	0	0
ENSG00000081248	0						coding	protein_coding	ENSG00000081248	CACNA1S	0	0	0	0	0	0	0	0	0	0	0	0	0	0	0
ENSG00000081277	0						coding	protein_coding	ENSG00000081277	PKP1	0	0	0	0	0	0	0	0	0	0	0	0	0	0	0
ENSG00000081307	134.329	0.21994	0.166205	1.32382	0.185564	0.489226	coding	protein_coding	ENSG00000081307	UBA5	139.27	138.702	130.996	189.798	191.056	107.825	140.492	139.705	152.771	129.181	118.478	123.299	113.591	111.702	88.0691
ENSG00000081320	146.864	0.0243754	0.14849	0.17292	0.862714	0.959929	coding	protein_coding	ENSG00000081320	STK17B	169.771	168.808	155.18	179.446	150.761	177.141	148.52	122.468	107.115	158.276	132.927	123.299	149.843	110.447	148.956
ENSG00000081377	92.0069	0.0799781	0.203898	0.389332	0.69703	0.894873	coding	protein_coding	ENSG00000081377	CDC14B	93.5178	79.5656	71.5442	117.33	93.7913	55.0126	71.5839	139.705	100.091	93.1034	75.1324	101.893	100.701	90.3654	96.7673
ENSG00000081386	82.1946	-0.0127818	0.212107	-0.0655428	0.947742	0.988322	coding	protein_coding	ENSG00000081386	ZNF510	77.1162	68.8135	83.6362	60.9655	48.6325	118.827	61.5488	73.4811	98.3352	125.69	89.5809	96.7554	98.2844	62.7538	68.4982
ENSG00000081479	0.508837	0.000839402	0.0593314	0.00535558	0.995727		coding	protein_coding	ENSG00000081479	LRP2	0.287747	0	3.023	1.15029	2.08425	0	0	0	0	0	0	0	0	0	1.08727
ENSG00000081665	15.4303	-0.0508601	0.178349	-0.295819	0.767368	0.92421	coding	protein_coding	ENSG00000081665	ZNF506	6.04269	39.7828	3.023	6.90175	9.72651	23.1053	10.0351	31.7511	8.77993	8.14655	31.7868	9.41867	3.22244	12.5508	27.1818
ENSG00000081692	55.9233	0.396254	0.193243	2.05402	0.0399736	0.19732	coding	protein_coding	ENSG00000081692	JMJD4	41.1478	47.3093	54.4139	72.4684	59.0538	71.5164	43.4856	60.7807	45.6556	62.8448	63.5736	53.087	66.06	37.6523	59.8
ENSG00000081721	84.0121	-0.00457229	0.17641	-0.0260394	0.979226	0.995653	coding	protein_coding	ENSG00000081721	DUSP12	74.5265	80.6408	100.767	90.8731	88.9281	71.5164	76.936	110.675	68.4835	88.4482	72.2427	83.0555	79.7554	92.8756	80.4582
ENSG00000081760	149.785	0.0934745	0.183919	0.506343	0.612616	0.854811	coding	protein_coding	ENSG00000081760	AACS	137.543	137.627	118.904	113.879	161.182	151.835	133.802	140.612	196.67	129.181	228.287	139.567	145.815	185.751	126.124
ENSG00000081791	143.425	-0.341962	0.129703	-2.64613	0.00814181	0.0646876	coding	protein_coding	ENSG00000081791	KIAA0141	155.383	154.83	140.065	115.029	115.329	117.727	157.217	134.262	129.943	129.181	141.596	151.555	177.234	165.67	166.353
ENSG00000081800	0.172509	0.0100295	0.0420288	0.300685	0.763654		coding	protein_coding	ENSG00000081800	SLC13A1	0	0	0	0	0.694751	0	0	0	0	0	0	0	0.80561	0	1.08727
ENSG00000081803	0.833974	0	0.0760094	0	1		coding	protein_coding	ENSG00000081803	CADPS2	0	0	0	0	0	0	0.669009	2.72152	0	0	2.88971	1.71248	0	1.25508	3.26182
ENSG00000081818	1.11846	0.0509996	0.0910395	0.407901	0.683346		coding	protein_coding	ENSG00000081818	PCDHB4	0.863241	1.07521	2.01533	3.45088	3.47375	0	2.67603	0	0	0	0	0	3.22244	0	0
ENSG00000081842	3.96189	-0.101968	0.139435	-0.667032	0.504751		coding	protein_coding	ENSG00000081842	PCDHA6	5.46719	6.45126	6.04599	4.60117	0	5.50126	2.00703	0	8.77993	2.32758	0	3.42497	10.4729	0	4.34909
ENSG00000081853	2.97836	-0.00357661	0.160282	-0.00550357	0.995609		coding	protein_coding	ENSG00000081853	PCDHGA2	4.31621	2.15042	4.03066	3.45088	4.86325	2.20051	3.34504	0	0	3.49138	2.88971	3.42497	7.25049	0	3.26182
ENSG00000081870	79.1574	0.140572	0.17972	0.786719	0.431447	0.734092	coding	protein_coding	ENSG00000081870	HSPB11	81.1447	64.5126	88.6745	113.879	79.8963	73.7169	39.4715	55.3376	63.2155	91.9396	80.9118	94.1867	87.8115	87.8553	84.8073
ENSG00000081913	172.276	0.162307	0.211949	0.769837	0.441397	0.741732	coding	protein_coding	ENSG00000081913	PHLPP1	164.591	134.401	138.05	235.81	111.16	173.84	226.125	111.582	161.551	168.75	101.14	231.185	225.571	229.679	170.702
ENSG00000081923	127.122	0.254942	0.182642	1.39412	0.16328	0.458812	coding	protein_coding	ENSG00000081923	ATP8B1	126.609	120.424	116.889	143.787	159.098	151.835	107.041	107.047	126.431	83.7931	153.155	150.699	120.842	154.374	84.8073
ENSG00000081985	0.234132	0	0.0419945	0	1		coding	protein_coding	ENSG00000081985	IL12RB2	0	0	0	0	0	0	0	0	3.51197	0	0	0	0	0	0
ENSG00000082014	55.3419	-0.480025	0.216864	-2.20427	0.0275054	0.154215	coding	protein_coding	ENSG00000082014	SMARCD3	65.0308	56.9862	91.6975	32.2082	38.906	56.1129	63.5558	50.8017	38.6317	40.7327	89.5809	35.1059	55.5871	56.4784	58.7127
ENSG00000082068	75.9355	-0.343522	0.217455	-1.58626	0.112679	0.372531	coding	protein_coding	ENSG00000082068	WDR70	79.7059	105.371	78.5979	55.214	80.5911	42.9099	61.5488	50.8017	82.5314	88.4482	75.1324	84.768	134.537	67.7741	51.1018
ENSG00000082074	50.3118	0.503557	0.219026	2.30914	0.0209359	0.127272	coding	protein_coding	ENSG00000082074	FYB	30.7889	52.6853	27.207	51.7631	47.9378	92.4212	49.5066	41.73	52.6796	55.862	83.8015	40.2434	50.7534	41.4175	35.88
ENSG00000082126	3.58888	-0.104759	0.175493	-0.670408	0.502598		coding	protein_coding	ENSG00000082126	MPP4	3.74071	5.37605	3.023	2.30058	2.08425	3.30076	9.36612	3.6287	1.75599	4.65517	0	5.13745	4.02805	0	5.43636
ENSG00000082146	100.582	-0.0194708	0.152749	-0.135666	0.892085	0.96829	coding	protein_coding	ENSG00000082146	STRADB	92.9423	94.6185	96.7358	98.9251	95.8756	83.6192	97.6753	115.211	105.359	118.707	106.919	88.193	107.146	115.467	91.3309
ENSG00000082153	1489.32	0.104669	0.0900411	1.16291	0.244868	0.564527	coding	protein_coding	ENSG00000082153	BZW1	1482.76	1404.23	1617.3	1861.17	1604.18	1394.02	1527.35	1426.08	1501.37	1448.92	1415.96	1372.56	1410.62	1437.06	1436.29
ENSG00000082175	0.0446006	0	0.0419558	0	1		coding	protein_coding	ENSG00000082175	PGR	0	0	0	0	0	0	0.669009	0	0	0	0	0	0	0	0
ENSG00000082196	2.29348	-0.173641	0.135582	-1.51916	0.128721		coding	protein_coding	ENSG00000082196	C1QTNF3	3.45296	3.22563	4.03066	2.30058	0	0	2.00703	4.53587	0	1.16379	0	4.28121	5.63927	3.76523	0
ENSG00000082212	401.812	0.234353	0.138682	1.69019	0.0909922	0.328325	coding	protein_coding	ENSG00000082212	ME2	431.621	384.925	354.698	557.892	407.819	447.803	430.842	304.81	386.317	399.181	340.986	444.39	356.08	384.053	395.767
ENSG00000082213	98.2563	-0.102217	0.210927	-0.478977	0.631955	0.863011	coding	protein_coding	ENSG00000082213	C5orf22	101.287	89.2425	138.05	57.5146	116.023	121.028	74.26	72.5739	68.4835	87.2844	86.6912	108.743	111.174	74.0494	167.44
ENSG00000082258	136.388	-0.00574267	0.180867	-0.0295623	0.976416	0.995653	coding	protein_coding	ENSG00000082258	CCNT2	141.859	152.68	121.927	144.937	112.55	159.537	105.703	116.118	103.603	212.974	190.721	162.686	131.314	65.2639	123.949
ENSG00000082269	108.003	0.0352813	0.202308	0.172709	0.86288	0.959934	coding	protein_coding	ENSG00000082269	FAM135A	91.2158	102.145	104.797	108.127	108.381	90.2207	69.5769	95.2533	175.599	140.819	138.706	111.311	116.008	76.5596	91.3309
ENSG00000082293	0.90041	-0.126495	0.102325	-0.956067	0.339039		coding	protein_coding	ENSG00000082293	COL19A1	0.575494	2.15042	4.03066	0	0.694751	1.10025	0	0	1.75599	0	0	0.856242	0	1.25508	1.08727
ENSG00000082397	0						coding	protein_coding	ENSG00000082397	EPB41L3	0	0	0	0	0	0	0	0	0	0	0	0	0	0	0
ENSG00000082438	68.324	-0.423697	0.215313	-2.02768	0.0425934	0.206278	coding	protein_coding	ENSG00000082438	COBLL1	85.1731	67.7383	56.4292	37.9596	29.1795	67.1154	57.5347	42.6372	91.3113	84.9568	66.4633	62.5057	105.535	86.6002	83.72
ENSG00000082458	42.339	0.0510413	0.226262	0.224752	0.822172	0.94617	coding	protein_coding	ENSG00000082458	DLG3	54.3842	31.1811	63.4829	43.7111	61.1381	55.0126	44.1546	7.25739	31.6078	47.7155	40.4559	36.8184	31.4188	38.9073	47.84
ENSG00000082482	0.543494	0.0119976	0.0601354	0.423186	0.67216		coding	protein_coding	ENSG00000082482	KCNK2	0	0	0	0	0.694751	0	0.669009	1.81435	0	0	0	1.71248	0	0	3.26182
ENSG00000082497	66.4303	1.2116	0.186826	6.49665	8.21265e-11	6.24205e-09	coding	protein_coding	ENSG00000082497	SERTAD4	29.6379	21.5042	34.2606	95.4742	93.0966	69.3159	65.5629	59.8735	57.9475	107.069	89.5809	82.1993	73.3105	66.519	51.1018
ENSG00000082512	73.7359	0.0427874	0.206878	0.207686	0.835474	0.950148	coding	protein_coding	ENSG00000082512	TRAF5	79.1304	72.0391	71.5442	59.8152	91.7071	80.3184	97.6753	76.2026	68.4835	105.905	52.0147	43.6684	70.0881	76.5596	60.8873
ENSG00000082515	146.048	0.117472	0.181524	0.647832	0.517094	0.794817	coding	protein_coding	ENSG00000082515	MRPL22	117.401	153.755	144.096	185.197	127.834	145.233	124.436	175.085	135.211	110.56	176.272	167.823	139.371	173.2	115.251
ENSG00000082516	239.884	-0.102048	0.131429	-0.784167	0.432942	0.735247	coding	protein_coding	ENSG00000082516	GEMIN5	229.91	206.44	231.763	189.798	219.541	207.948	232.815	312.068	254.618	235.086	300.53	274.854	232.016	212.108	258.771
ENSG00000082556	0.586554	-0.0736361	0.0679808	-1.00892	0.313015		coding	protein_coding	ENSG00000082556	OPRK1	0	2.15042	2.01533	0	0	0	0	0.907174	1.75599	1.16379	0	0	0.80561	0	0
ENSG00000082641	469.503	-0.613195	0.200761	-3.03935	0.0023709	0.0256256	coding	protein_coding	ENSG00000082641	NFE2L1	707.858	468.792	780.94	354.29	379.334	364.184	436.194	411.857	367.001	602.844	262.963	310.816	468.059	397.859	729.56
ENSG00000082684	0.101683	0	0.0419945	0	1		coding	protein_coding	ENSG00000082684	SEMA5B	0	0	0	0	0	0	0.669009	0	0	0	0	0.856242	0	0	0
ENSG00000082701	591.67	1.3143e-05	0.142467	0.00170396	0.99864	0.999344	coding	protein_coding	ENSG00000082701	GSK3B	539.814	787.054	723.504	645.314	732.267	662.352	501.757	488.967	556.648	484.138	586.611	492.339	612.264	429.236	632.793
ENSG00000082781	1340.08	0.194317	0.0999083	1.94486	0.0517918	0.234019	coding	protein_coding	ENSG00000082781	ITGB5	1343.2	1364.44	1036.89	1414.86	1526.37	1378.62	1530.69	1325.38	1288.89	1397.71	1245.46	1340.02	1298.64	1297.75	1312.34
ENSG00000082805	469.863	-0.197054	0.207894	-0.961639	0.336231	0.656964	coding	protein_coding	ENSG00000082805	ERC1	378.675	537.605	422.212	280.671	508.557	303.67	794.113	284.853	588.255	423.62	615.508	470.933	531.703	485.714	421.862
ENSG00000082898	1072.95	-0.284692	0.124943	-2.28015	0.0225987	0.134284	coding	protein_coding	ENSG00000082898	XPO1	1228.39	1107.47	1038.9	889.176	951.808	882.403	1081.79	1275.49	955.257	920.56	1063.41	1125.96	1090.8	1045.48	1437.37
ENSG00000082929	0						coding	protein_coding	ENSG00000082929	C4orf6	0	0	0	0	0	0	0	0	0	0	0	0	0	0	0
ENSG00000082996	154.884	-0.0668973	0.167197	-0.396327	0.691864	0.891843	coding	protein_coding	ENSG00000082996	RNF13	185.309	145.153	169.288	117.33	174.382	182.642	162.569	174.177	114.139	178.06	158.934	145.561	136.148	122.997	156.567
ENSG00000083067	6.76482	-0.0455386	0.214016	-0.321808	0.747598	0.915843	coding	protein_coding	ENSG00000083067	TRPM3	6.90593	3.22563	5.03833	6.90175	4.86325	2.20051	6.69009	8.16457	7.02395	9.31034	5.77942	9.41867	10.4729	10.0406	5.43636
ENSG00000083093	155.252	-0.126299	0.145862	-0.86169	0.388858	0.702059	coding	protein_coding	ENSG00000083093	PALB2	186.46	165.582	156.188	159.891	157.708	146.334	148.52	167.827	135.211	174.569	101.14	166.967	147.427	168.18	146.782
ENSG00000083097	61.9337	-0.161991	0.226233	-0.766016	0.443667	0.743386	coding	protein_coding	ENSG00000083097	DOPEY1	48.3415	79.5656	37.2836	46.0117	45.1588	38.5088	56.1967	107.954	31.6078	59.3534	89.5809	69.3556	72.5049	111.702	35.88
ENSG00000083099	156.169	-0.397518	0.16045	-2.48256	0.0130443	0.090971	coding	protein_coding	ENSG00000083099	LYRM2	180.13	201.064	136.035	129.983	111.16	135.331	155.21	172.363	170.331	167.586	199.39	154.98	111.174	156.884	160.916
ENSG00000083123	35.108	0.0993126	0.215852	0.45097	0.652012	0.873343	coding	protein_coding	ENSG00000083123	BCKDHB	32.5154	27.9555	27.207	24.1561	38.2113	35.2081	40.1405	29.0296	54.4356	57.0258	43.3456	37.6747	30.6132	17.5711	31.5309
ENSG00000083168	595.558	-0.00341844	0.180319	-0.0191846	0.984694	0.996303	coding	protein_coding	ENSG00000083168	KAT6A	711.599	483.845	562.277	524.533	531.484	701.961	533.869	439.979	900.821	572.586	575.052	621.632	595.346	681.506	496.884
ENSG00000083223	242.562	0.164891	0.210448	0.779199	0.435862	0.73742	coding	protein_coding	ENSG00000083223	ZCCHC6	221.278	249.449	243.855	282.972	312.638	246.457	178.625	257.637	223.01	388.707	170.493	225.192	207.847	315.024	115.251
ENSG00000083290	152.216	-0.242043	0.208954	-1.15382	0.248575	0.568068	coding	protein_coding	ENSG00000083290	ULK2	183.007	84.9416	256.955	143.787	160.487	107.825	156.548	205.929	152.771	122.198	150.265	141.28	165.956	122.997	128.298
ENSG00000083307	0						coding	protein_coding	ENSG00000083307	GRHL2	0	0	0	0	0	0	0	0	0	0	0	0	0	0	0
ENSG00000083312	1221.86	-0.0132751	0.0877323	-0.150055	0.880721	0.965562	coding	protein_coding	ENSG00000083312	TNPO1	1381.19	1342.94	1233.38	1187.1	1388.11	1345.61	1164.74	1063.21	983.352	1171.94	1291.7	1151.65	1214.05	1118.27	1290.59
ENSG00000083444	322.276	0.313598	0.11244	2.79057	0.00526153	0.0474205	coding	protein_coding	ENSG00000083444	PLOD1	280.266	274.179	352.683	389.949	354.323	397.191	344.539	296.646	319.59	286.293	326.537	331.366	286.797	293.688	300.087
ENSG00000083454	7.67435	-0.122147	0.204262	-0.665446	0.505765	0.786857	coding	protein_coding	ENSG00000083454	P2RX5	6.61818	4.30084	11.0843	4.60117	9.03176	1.10025	17.3942	7.25739	8.77993	6.98275	11.5588	7.70618	3.22244	10.0406	5.43636
ENSG00000083457	61.7133	0.220395	0.181538	1.20918	0.226595	0.545134	coding	protein_coding	ENSG00000083457	ITGAE	52.37	49.4597	52.3986	69.0175	54.8853	64.9149	72.9219	69.8524	52.6796	64.0086	80.9118	55.6557	54.7815	75.3045	56.5382
ENSG00000083520	187.728	-0.256323	0.14769	-1.73944	0.0819572	0.307675	coding	protein_coding	ENSG00000083520	DIS3	204.588	179.56	209.594	140.336	169.519	174.94	206.055	167.827	154.527	224.612	182.052	229.473	229.599	168.18	175.051
ENSG00000083535	46.4286	0.023081	0.226314	0.102237	0.918569	0.977803	coding	protein_coding	ENSG00000083535	PIBF1	38.5581	78.4904	32.2453	31.0579	58.3591	62.7144	47.4996	29.0296	40.3877	51.2069	95.3604	38.5309	46.7254	28.8667	17.3964
ENSG00000083544	60.3028	0.19313	0.213374	0.906431	0.364708	0.682084	coding	protein_coding	ENSG00000083544	TDRD3	51.5067	29.0307	51.3909	27.607	64.6118	70.4162	62.2178	62.595	50.9236	91.9396	86.6912	66.7869	53.9759	65.2639	69.5855
ENSG00000083622	0						other	antisense	ENSG00000083622	AC000111.6	0	0	0	0	0	0	0	0	0	0	0	0	0	0	0
ENSG00000083635	62.8457	-0.143757	0.184221	-0.7924	0.428128	0.732071	coding	protein_coding	ENSG00000083635	NUFIP1	54.3842	58.0614	75.5749	58.6649	58.3591	45.1104	74.26	68.0381	80.7754	69.8275	60.6839	52.2308	67.6713	69.0291	50.0145
ENSG00000083642	309.724	-0.086559	0.182332	-0.475802	0.634215	0.864102	coding	protein_coding	ENSG00000083642	PDS5B	315.371	336.541	282.146	287.573	296.659	281.665	388.694	223.165	314.322	334.008	508.589	237.179	294.853	271.096	273.993
ENSG00000083720	36.6813	-0.0204772	0.226309	-0.0860463	0.93143	0.983801	coding	protein_coding	ENSG00000083720	OXCT1	32.2277	58.0614	31.2376	42.5608	42.3798	31.9073	34.1194	29.0296	17.5599	39.5689	17.3382	82.1993	25.7795	23.8464	42.4036
ENSG00000083750	49.9954	0.0723856	0.225311	0.318686	0.749964	0.917104	coding	protein_coding	ENSG00000083750	RRAGB	63.0166	58.0614	37.2836	67.8672	81.2858	24.2056	37.4645	65.3165	26.3398	48.8793	34.6765	50.5183	43.5029	61.4987	50.0145
ENSG00000083782	0						coding	protein_coding	ENSG00000083782	EPYC	0	0	0	0	0	0	0	0	0	0	0	0	0	0	0
ENSG00000083799	110.016	-0.098372	0.217007	-0.45404	0.6498	0.872319	coding	protein_coding	ENSG00000083799	CYLD	90.6403	137.627	116.889	94.324	141.729	70.4162	194.682	153.312	89.5553	123.362	57.7942	94.1867	90.2283	71.5393	123.949
ENSG00000083807	99.9613	0.0384083	0.202848	0.188144	0.850764	0.955871	coding	protein_coding	ENSG00000083807	SLC27A5	107.617	81.716	97.7435	94.324	100.739	104.524	88.3091	73.4811	93.0673	155.948	54.9044	139.567	124.87	72.7944	109.815
ENSG00000083812	35.4994	0.54869	0.208596	2.62397	0.00869108	0.0680664	coding	protein_coding	ENSG00000083812	ZNF324	28.7747	26.8803	25.1916	58.6649	44.464	38.5088	28.7674	40.8228	33.3637	38.4051	31.7868	29.9685	35.4468	46.4378	25.0073
ENSG00000083814	0.33396	0.00923659	0.0448739	0.165264	0.868736		coding	protein_coding	ENSG00000083814	ZNF671	0	0	1.00767	0	1.3895	0	0	0	1.75599	0	0	0.856242	0	0	0
ENSG00000083817	22.7057	0.0420253	0.225118	0.173771	0.862045	0.959593	coding	protein_coding	ENSG00000083817	ZNF416	20.43	18.2786	19.1456	21.8555	15.9793	24.2056	26.0913	14.5148	35.1197	15.1293	40.4559	19.6936	21.7515	25.1015	22.8327
ENSG00000083828	28.0352	-0.576085	0.221277	-2.6679	0.00763281	0.0621691	coding	protein_coding	ENSG00000083828	ZNF586	41.7233	25.8051	28.2146	17.2544	14.5898	17.604	33.4504	29.0296	19.3158	22.1121	20.228	20.5498	39.4749	31.3769	59.8
ENSG00000083838	31.6801	0.123524	0.22201	0.556075	0.578159	0.833321	coding	protein_coding	ENSG00000083838	ZNF446	38.2704	27.9555	25.1916	42.5608	39.6008	25.3058	22.0773	30.8439	31.6078	37.2414	23.1177	23.9748	27.3907	53.9682	26.0945
ENSG00000083842	0						coding	protein_coding	ENSG00000083842	ZNF8	0	0	0	0	0	0	0	0	0	0	0	0	0	0	0
ENSG00000083844	26.0014	-0.0211634	0.226228	-0.0895894	0.928614	0.982556	coding	protein_coding	ENSG00000083844	ZNF264	19.5668	19.3538	45.3449	14.9538	27.79	37.4086	32.7814	33.5654	29.8518	25.6034	14.4485	11.9874	26.5851	30.1218	20.6582
ENSG00000083845	1813.39	0.160832	0.0828055	1.94223	0.0521092	0.234747	coding	protein_coding	ENSG00000083845	RPS5	1557	1638.62	1835.97	1780.65	1905.7	1948.55	1699.28	1876.04	1884.17	1728.23	1910.1	1986.48	1852.9	1686.82	1910.34
ENSG00000083857	3704.32	-0.0509068	0.092206	-0.552219	0.580798	0.835177	coding	protein_coding	ENSG00000083857	FAT1	3754.81	3548.2	3787.81	3754.55	3586.3	3350.27	4368.63	3433.65	3838.59	4107.02	4323	3466.07	3440.76	3431.38	3373.81
ENSG00000083896	248.908	0.0159246	0.186421	0.0853363	0.931994	0.983899	coding	protein_coding	ENSG00000083896	YTHDC1	234.226	260.201	246.878	242.712	220.931	288.266	289.012	249.473	163.307	289.784	132.927	259.441	337.551	262.311	256.596
ENSG00000083937	244.535	0.0709467	0.118065	0.598237	0.549682	0.815273	coding	protein_coding	ENSG00000083937	CHMP2B	231.061	218.268	231.763	223.157	244.552	250.858	234.153	301.182	247.594	238.577	254.294	232.898	226.376	272.351	260.945
ENSG00000084070	39.0372	-0.286517	0.21061	-1.3644	0.172443	0.470247	coding	protein_coding	ENSG00000084070	SMAP2	44.8885	40.858	47.3603	32.2082	34.0428	33.0076	48.8376	58.0591	21.0718	36.0776	31.7868	40.2434	43.5029	30.1218	43.4909
ENSG00000084072	72.9528	0.240175	0.169692	1.41787	0.156228	0.446971	coding	protein_coding	ENSG00000084072	PPIE	63.3044	66.6631	71.5442	90.8731	68.0856	88.0202	78.274	80.7385	54.4356	60.5172	69.353	71.0681	73.3105	76.5596	81.5455
ENSG00000084073	293.466	-0.131504	0.116506	-1.12531	0.260458	0.58078	coding	protein_coding	ENSG00000084073	ZMPSTE24	333.787	317.187	314.392	248.463	302.911	324.575	236.16	279.41	240.57	301.422	291.86	297.972	327.883	263.566	321.833
ENSG00000084090	547.812	-0.467248	0.184865	-2.52245	0.0116542	0.0841245	coding	protein_coding	ENSG00000084090	STARD7	622.109	660.179	774.894	487.724	531.484	343.279	561.298	439.979	823.558	449.224	473.912	322.803	485.783	507.05	733.909
ENSG00000084092	108.171	-0.302383	0.156132	-1.94303	0.052012	0.234575	coding	protein_coding	ENSG00000084092	NOA1	108.481	108.596	130.996	74.769	93.7913	101.223	86.3021	107.954	98.3352	116.379	112.699	134.43	103.924	130.528	114.164
ENSG00000084093	288.228	-0.00816162	0.165074	-0.0500168	0.960109	0.991236	coding	protein_coding	ENSG00000084093	REST	289.474	301.059	261.993	257.665	314.722	272.863	364.61	263.988	326.613	353.793	179.162	244.885	298.076	258.545	335.967
ENSG00000084110	1.9082	0.0243412	0.107239	0.322615	0.746987		coding	protein_coding	ENSG00000084110	HAL	1.43874	0	0	2.30058	0.694751	0	0	2.72152	0	6.98275	0	0	4.02805	5.0203	5.43636
ENSG00000084112	660.408	0.716896	0.117696	6.08753	1.14668e-09	7.14815e-08	coding	protein_coding	ENSG00000084112	SSH1	585.565	460.19	505.848	952.442	980.988	729.467	603.446	674.938	626.887	706.422	693.53	736.368	538.953	503.285	607.785
ENSG00000084207	1792.42	0.160931	0.0980512	1.64132	0.10073	0.349276	coding	protein_coding	ENSG00000084207	GSTP1	1629.8	1557.98	1940.76	1692.08	2071.05	1994.76	1849.81	1892.37	1636.58	1801.55	1563.33	1709.06	1848.88	1775.93	1922.3
ENSG00000084234	1165.54	0.221804	0.116398	1.90541	0.0567263	0.24583	coding	protein_coding	ENSG00000084234	APLP2	1139.48	981.667	963.328	1341.24	1175.52	1133.26	1082.46	1037.81	1425.86	1104.44	1369.72	1236.41	1121.41	1213.66	1156.86
ENSG00000084444	29.5855	0.113483	0.225013	0.499651	0.617321	0.857085	coding	protein_coding	ENSG00000084444	KIAA1467	25.6095	51.6101	26.1993	48.3123	32.6533	36.3083	17.3942	24.4937	33.3637	33.75	8.66912	24.831	29.8076	30.1218	20.6582
ENSG00000084453	8.14887	-0.288876	0.196558	-1.51879	0.128816	0.400994	coding	protein_coding	ENSG00000084453	SLCO1A2	6.33044	19.3538	9.06899	8.05204	0.694751	6.60152	6.69009	4.53587	1.75599	18.6207	8.66912	12.8436	8.0561	8.78553	2.17455
ENSG00000084463	391.965	-0.117075	0.139051	-0.839801	0.40102	0.709904	coding	protein_coding	ENSG00000084463	WBP11	435.361	379.549	473.603	460.117	423.798	292.667	404.75	349.262	319.59	322.37	369.883	371.609	406.833	433.001	437.084
ENSG00000084623	565.176	0.119906	0.10132	1.1839	0.236453	0.556223	coding	protein_coding	ENSG00000084623	EIF3I	552.187	545.132	554.216	607.354	587.759	609.54	582.707	537.047	560.16	523.707	511.478	580.532	473.699	614.987	637.142
ENSG00000084628	2.56655	0.32094	0.132684	1.96758	0.0491168		coding	protein_coding	ENSG00000084628	NKAIN1	1.15099	0	2.01533	17.2544	1.3895	4.40101	1.33802	0	0	3.49138	0	0	4.02805	1.25508	2.17455
ENSG00000084636	39.3375	-0.227113	0.22186	-1.09622	0.272983	0.593082	coding	protein_coding	ENSG00000084636	COL16A1	35.9684	23.6546	61.4676	34.5088	20.8425	24.2056	34.7885	24.4937	100.091	25.6034	23.1177	48.8058	32.2244	26.3566	73.9345
ENSG00000084652	321.221	0.186974	0.112261	1.66646	0.0956219	0.338078	coding	protein_coding	ENSG00000084652	TXLNA	281.417	277.404	358.729	368.093	336.954	344.379	287.674	337.469	312.566	296.767	317.868	317.666	324.661	308.748	347.927
ENSG00000084674	0.117066	0	0.0419558	0	1		coding	protein_coding	ENSG00000084674	APOB	0	0	0	0	0	0	0	0	1.75599	0	0	0	0	0	0
ENSG00000084676	154.269	-0.752558	0.193069	-3.94404	8.01203e-05	0.0015578	coding	protein_coding	ENSG00000084676	NCOA1	161.138	170.959	197.502	73.6187	105.602	81.4187	127.781	180.528	179.111	138.491	135.816	234.61	204.625	194.537	128.298
ENSG00000084693	80.9854	-0.107112	0.179092	-0.594811	0.55197	0.816413	coding	protein_coding	ENSG00000084693	AGBL5	90.3526	83.8664	82.6285	59.8152	98.6546	73.7169	78.943	100.696	80.7754	69.8275	72.2427	58.2245	84.5891	105.426	75.0218
ENSG00000084710	109.225	0.374233	0.1751	2.13694	0.0326025	0.172196	coding	protein_coding	ENSG00000084710	EFR3B	97.834	86.0169	94.7205	140.336	118.802	126.529	100.351	107.047	114.139	136.164	95.3604	98.4679	142.593	77.8147	102.204
ENSG00000084731	367.846	-0.0572085	0.158194	-0.360839	0.71822	0.903231	coding	protein_coding	ENSG00000084731	KIF3C	412.054	421.483	314.392	410.654	293.88	397.191	392.039	401.878	280.958	304.914	421.897	290.266	405.222	357.696	413.164
ENSG00000084733	1057.61	0.0942111	0.0708564	1.33032	0.183414	0.486428	coding	protein_coding	ENSG00000084733	RAB10	1029.85	1046.18	1087.27	1099.68	1120.63	1157.47	1022.25	1085.89	1218.65	982.241	942.045	943.579	1056.15	1080.62	991.593
ENSG00000084734	0.187076	-0.00270891	0.0420451	-0.0700231	0.944175		coding	protein_coding	ENSG00000084734	GCKR	0.287747	0	0	0	0	0	0	0.907174	0	0	0	0	1.61122	0	0
ENSG00000084754	526.851	-0.0821669	0.0748206	-1.09809	0.272164	0.592507	coding	protein_coding	ENSG00000084754	HADHA	543.266	533.305	550.185	486.574	538.432	503.916	567.319	537.047	525.04	523.707	534.596	515.458	525.258	519.601	499.058
ENSG00000084764	26.9543	-0.0302463	0.22617	-0.115667	0.907916	0.974197	coding	protein_coding	ENSG00000084764	MAPRE3	32.8032	26.8803	35.2683	21.8555	29.1795	40.7093	20.0703	21.7722	33.3637	11.6379	37.5662	17.1248	27.3907	38.9073	9.78545
ENSG00000084774	348.438	-0.0353149	0.138653	-0.255732	0.798158	0.937291	coding	protein_coding	ENSG00000084774	CAD	344.146	362.346	322.453	273.77	407.819	313.572	442.884	370.127	303.786	368.922	338.096	350.203	350.44	330.085	347.927
ENSG00000085063	1350.41	0.638837	0.099888	6.395	1.6055e-10	1.15247e-08	coding	protein_coding	ENSG00000085063	CD59	1092.58	935.433	1149.75	1828.96	1681.3	1564.56	1443.05	1295.44	1097.49	1536.21	1470.86	1437.63	1300.25	1213.66	1209.05
ENSG00000085117	15.6721	0.229568	0.226098	1.00791	0.313497	0.635445	coding	protein_coding	ENSG00000085117	CD82	17.8403	15.0529	11.0843	14.9538	18.7583	27.5063	16.7252	11.7933	12.2919	13.9655	23.1177	11.9874	10.4729	17.5711	11.96
ENSG00000085185	93.5415	-0.446502	0.173596	-2.57639	0.00998394	0.0755534	coding	protein_coding	ENSG00000085185	BCORL1	102.15	95.6938	124.95	59.8152	72.2541	88.0202	119.753	81.6457	115.895	87.2844	83.8015	83.0555	110.369	90.3654	88.0691
ENSG00000085224	349.1	-0.442886	0.211965	-2.13126	0.0330674	0.173748	coding	protein_coding	ENSG00000085224	ATRX	198.258	532.229	365.782	227.758	202.172	256.359	444.222	272.152	323.101	687.801	384.331	403.29	404.416	266.076	268.556
ENSG00000085231	287.309	0.0896948	0.122021	0.736423	0.461473	0.755636	coding	protein_coding	ENSG00000085231	TAF9	264.727	308.585	287.185	348.539	269.563	301.469	263.589	331.119	287.982	281.638	254.294	267.148	307.743	268.586	267.469
ENSG00000085265	0						coding	protein_coding	ENSG00000085265	FCN1	0	0	0	0	0	0	0	0	0	0	0	0	0	0	0
ENSG00000085274	81.249	0.154633	0.194739	0.792639	0.427988	0.732047	coding	protein_coding	ENSG00000085274	MYNN	79.1304	61.287	78.5979	55.214	88.2333	110.025	100.351	73.4811	79.0194	91.9396	78.0221	87.3367	60.4208	94.1306	81.5455
ENSG00000085276	5.29393	0.0466444	0.105852	0.806516	0.419946	0.726655	coding	protein_coding	ENSG00000085276	MECOM	2.30198	0	1.00767	1.15029	0.694751	8.80202	0.669009	0	61.4595	0	0	1.71248	1.61122	0	0
ENSG00000085365	153.638	0.161404	0.149557	1.08263	0.278973	0.600036	coding	protein_coding	ENSG00000085365	SCAMP1	147.327	144.078	186.418	157.59	184.804	196.945	121.091	111.582	93.0673	192.026	132.927	154.124	153.066	179.476	150.044
ENSG00000085377	168.53	-0.0721705	0.142189	-0.510681	0.609575	0.852738	coding	protein_coding	ENSG00000085377	PREP	170.922	152.68	176.341	193.249	154.929	126.529	183.308	141.519	165.063	172.241	173.382	165.255	185.29	176.966	190.273
ENSG00000085382	41.7933	0.241764	0.216301	1.11952	0.262919	0.58343	coding	protein_coding	ENSG00000085382	HACE1	37.9826	36.5572	25.1916	62.1158	29.1795	41.8096	48.1686	44.4515	70.2395	32.5862	28.8971	37.6747	55.5871	35.1421	41.3164
ENSG00000085415	237.47	-0.150582	0.134166	-1.11906	0.263114	0.583681	coding	protein_coding	ENSG00000085415	SEH1L	247.462	233.321	312.376	239.261	241.078	223.351	234.153	288.481	254.618	208.319	153.155	214.061	230.404	222.148	259.858
ENSG00000085433	47.4822	-0.502501	0.209958	-2.37876	0.0173708	0.111816	coding	protein_coding	ENSG00000085433	WDR47	57.5494	49.4597	76.5825	44.8614	34.0428	31.9073	36.7955	31.7511	24.5838	52.3707	43.3456	49.6621	50.7534	42.6726	85.8945
ENSG00000085449	291.944	0.0659286	0.194901	0.33831	0.735129	0.910013	coding	protein_coding	ENSG00000085449	WDFY1	278.539	205.365	381.905	373.845	270.953	276.163	341.194	288.481	309.054	332.845	199.39	303.966	286.797	179.476	351.189
ENSG00000085465	3.44468	-0.130219	0.131662	-1.36612	0.171902		coding	protein_coding	ENSG00000085465	OVGP1	0.863241	9.6769	1.00767	0	2.08425	0	4.01405	0.907174	1.75599	0	17.3382	1.71248	4.02805	5.0203	3.26182
ENSG00000085491	283.888	-0.130391	0.101171	-1.28643	0.198294	0.50928	coding	protein_coding	ENSG00000085491	SLC25A24	296.379	302.134	313.384	277.22	279.29	269.562	248.871	269.431	265.154	311.896	338.096	270.573	258.601	292.433	265.295
ENSG00000085511	183.501	0.423851	0.212598	2.01946	0.0434394	0.208865	coding	protein_coding	ENSG00000085511	MAP3K4	123.443	155.906	103.79	146.087	257.058	191.444	226.125	347.448	154.527	260.69	176.272	124.155	168.373	128.018	189.185
ENSG00000085514	6.05416	-0.107019	0.197776	-0.655036	0.512444	0.792187	coding	protein_coding	ENSG00000085514	PILRA	8.05692	2.15042	5.03833	1.15029	6.25276	3.30076	12.0422	6.35022	10.5359	3.49138	2.88971	7.70618	4.02805	11.2957	6.52364
ENSG00000085552	0.420752	0.0244445	0.0422626	0.609937	0.541903		coding	protein_coding	ENSG00000085552	IGSF9	0	0	0	0	2.779	0	2.67603	0	0	0	0	0.856242	0	0	0
ENSG00000085563	2.21468	0.191686	0.117189	1.71961	0.0855028		coding	protein_coding	ENSG00000085563	ABCB1	1.15099	0	0	11.5029	0.694751	1.10025	0.669009	0	0	0	2.88971	0.856242	0.80561	3.76523	9.78545
ENSG00000085644	63.7088	0.224909	0.198358	1.13556	0.256142	0.577224	coding	protein_coding	ENSG00000085644	ZNF213	53.521	49.4597	78.5979	96.6245	63.2223	63.8147	68.9079	57.152	80.7754	60.5172	57.7942	55.6557	51.559	45.1827	72.8473
ENSG00000085662	5228.12	0.342272	0.0685096	4.99596	5.85444e-07	2.09068e-05	coding	protein_coding	ENSG00000085662	AKR1B1	4706.1	4404.06	4826.72	6469.24	5915.11	5391.24	5332	5239.84	5083.58	5469.82	5400.86	5056.97	5044.73	4857.14	5224.35
ENSG00000085719	412.378	-0.0632474	0.100368	-0.631647	0.527618	0.803275	coding	protein_coding	ENSG00000085719	CPNE3	389.034	413.956	426.242	410.654	402.261	354.281	422.144	381.92	359.977	417.801	488.361	394.728	427.779	468.143	428.385
ENSG00000085721	194.264	-0.223478	0.150357	-1.47912	0.139108	0.419341	coding	protein_coding	ENSG00000085721	RRN3	231.061	229.02	220.679	142.636	199.393	227.752	210.738	156.941	205.45	144.31	176.272	160.974	224.765	188.261	195.709
ENSG00000085733	1075.62	-0.0414439	0.100092	-0.413902	0.678946	0.885937	coding	protein_coding	ENSG00000085733	CTTN	1091.42	1202.09	1008.67	1118.08	1174.82	904.408	1085.13	1040.53	1148.42	1062.54	962.273	969.266	1042.46	1201.11	1123.15
ENSG00000085741	1.52976	-0.0169463	0.12333	-0.140757	0.888062		coding	protein_coding	ENSG00000085741	WNT11	2.58972	0	2.01533	3.45088	0	1.10025	2.00703	1.81435	3.51197	2.32758	0	1.71248	2.41683	0	0
ENSG00000085760	195.976	-0.294715	0.166228	-1.77428	0.0760174	0.294156	coding	protein_coding	ENSG00000085760	MTIF2	206.315	247.298	195.487	139.185	204.257	160.637	231.477	162.384	207.206	183.879	176.272	243.173	226.376	171.945	183.749
ENSG00000085788	228.883	-0.476147	0.157868	-3.02281	0.00250443	0.0267233	coding	protein_coding	ENSG00000085788	DDHD2	252.354	238.697	267.031	159.891	196.614	156.236	289.681	234.051	328.369	154.784	222.507	251.735	208.653	217.128	255.509
ENSG00000085831	6.37955	0.00241577	0.200432	0.0137183	0.989055	0.99712	coding	protein_coding	ENSG00000085831	TTC39A	5.17945	11.8273	3.023	2.30058	6.25276	11.0025	8.0281	3.6287	3.51197	6.98275	5.77942	11.9874	3.22244	7.53045	5.43636
ENSG00000085832	189.584	-0.119376	0.15607	-0.763074	0.445419	0.74459	coding	protein_coding	ENSG00000085832	EPS15	197.107	223.644	188.433	177.145	184.804	190.344	158.555	177.806	147.503	167.586	228.287	172.105	273.907	178.221	178.313
ENSG00000085840	120.055	-1.24877	0.153387	-8.08065	6.4421e-16	9.84533e-14	coding	protein_coding	ENSG00000085840	ORC1	162.289	170.959	174.326	63.2661	65.3066	55.0126	117.746	141.519	110.627	90.7758	92.4706	99.3241	157.9	124.252	175.051
ENSG00000085871	122.974	0.0841174	0.160258	0.523236	0.60081	0.84718	coding	protein_coding	ENSG00000085871	MGST2	131.213	86.0169	127.973	149.538	121.581	104.524	130.457	130.633	119.407	112.888	138.706	114.736	122.453	130.528	123.949
ENSG00000085872	263.914	0.213238	0.132569	1.60777	0.107886	0.363052	coding	protein_coding	ENSG00000085872	CHERP	231.636	225.794	240.832	272.619	245.247	306.97	273.625	322.954	265.154	309.569	286.081	222.623	260.212	224.658	270.731
ENSG00000085978	208.129	0.300585	0.220096	1.3762	0.168759	0.46595	coding	protein_coding	ENSG00000085978	ATG16L1	222.141	96.769	167.272	205.902	293.88	187.043	300.385	144.241	205.45	228.103	257.184	141.28	204.625	326.32	141.345
ENSG00000085982	196.272	-0.209734	0.208586	-1.00633	0.314259	0.635992	coding	protein_coding	ENSG00000085982	USP40	265.878	197.839	174.326	157.59	239.689	119.928	268.272	181.435	196.67	165.259	210.949	223.479	222.348	217.128	103.291
ENSG00000085998	129.802	-0.0463788	0.184912	-0.252829	0.8004	0.938699	coding	protein_coding	ENSG00000085998	POMGNT1	115.387	151.605	119.912	127.682	134.782	105.624	174.611	191.414	101.847	159.44	101.14	123.299	100.701	133.038	106.553
ENSG00000085999	65.0913	-0.216891	0.185514	-1.19317	0.232803	0.552116	coding	protein_coding	ENSG00000085999	RAD54L	64.7431	54.8357	68.5212	48.3123	50.022	57.2131	62.8868	81.6457	64.9715	54.6982	52.0147	54.7995	99.09	61.4987	101.116
ENSG00000086015	260.53	0.158512	0.152566	1.0387	0.298946	0.620824	coding	protein_coding	ENSG00000086015	MAST2	258.397	290.307	181.38	259.966	293.88	275.063	271.618	247.659	270.422	253.707	225.397	310.816	274.713	210.853	283.778
ENSG00000086061	1814.73	0.632975	0.0648917	9.75367	1.77918e-22	5.1607e-20	coding	protein_coding	ENSG00000086061	DNAJA1	1573.98	1476.26	1616.29	2473.13	2512.91	2320.43	1614.99	1468.71	1541.76	1951.68	1965	1917.13	1482.32	1659.21	1647.22
ENSG00000086062	2955.97	-0.339111	0.0570104	-5.9478	2.71773e-09	1.58959e-07	coding	protein_coding	ENSG00000086062	B4GALT1	3445.2	3298.75	3267.86	2575.5	2743.57	2565.79	2888.78	2903.86	2742.85	2900.17	3080.43	2686.03	3112.88	3049.83	3078.07
ENSG00000086065	169.885	-0.0735955	0.118749	-0.616551	0.537531	0.808523	coding	protein_coding	ENSG00000086065	CHMP5	170.922	184.936	187.426	186.347	161.182	165.038	172.604	158.755	173.843	168.75	147.375	166.967	156.288	178.221	169.615
ENSG00000086102	276.66	0.408277	0.131517	3.10524	0.00190123	0.0214974	coding	protein_coding	ENSG00000086102	NFX1	219.263	258.051	218.663	333.585	293.88	321.274	243.519	334.747	261.642	253.707	291.86	302.254	298.881	276.117	242.462
ENSG00000086159	6.9213	0.232112	0.201625	1.157	0.247271	0.566974	coding	protein_coding	ENSG00000086159	AQP6	7.19368	2.15042	4.03066	8.05204	10.4213	7.70177	5.35207	8.16457	3.51197	10.4741	2.88971	9.41867	5.63927	2.51015	16.3091
ENSG00000086189	155.396	-0.100566	0.138419	-0.725998	0.46784	0.76002	coding	protein_coding	ENSG00000086189	DIMT1	166.606	141.928	173.318	134.584	166.045	144.133	123.098	163.291	143.991	159.44	173.382	178.098	148.232	166.925	147.869
ENSG00000086200	148.126	-0.305148	0.17294	-1.75822	0.0787105	0.300417	coding	protein_coding	ENSG00000086200	IPO11	203.149	167.733	147.119	129.983	101.434	176.04	146.513	152.405	177.355	154.784	101.14	129.293	138.565	143.079	153.305
ENSG00000086205	0						coding	protein_coding	ENSG00000086205	FOLH1	0	0	0	0	0	0	0	0	0	0	0	0	0	0	0
ENSG00000086232	1018.73	-0.196572	0.128041	-1.53516	0.124745	0.394	coding	protein_coding	ENSG00000086232	EIF2AK1	1141.49	965.539	1151.76	881.124	1133.14	788.881	1088.48	964.326	1195.83	972.93	1100.98	1005.23	847.502	948.837	1094.88
ENSG00000086288	0.312204	0	0.0421744	0	1		coding	protein_coding	ENSG00000086288	NME8	0	0	0	0	0	0	4.68306	0	0	0	0	0	0	0	0
ENSG00000086289	269.789	0.253053	0.137893	1.83605	0.0663509	0.27101	coding	protein_coding	ENSG00000086289	EPDR1	260.699	247.298	260.985	297.926	275.816	365.284	263.589	300.275	235.302	272.327	265.853	223.479	217.515	304.983	255.509
ENSG00000086300	15.0274	-0.0880495	0.224451	-0.399349	0.689636	0.890397	coding	protein_coding	ENSG00000086300	SNX10	15.2506	16.1282	13.0996	6.90175	16.674	14.3033	5.35207	14.5148	7.02395	12.8017	34.6765	17.9811	12.8898	22.5914	15.2218
ENSG00000086475	321.487	-0.296709	0.131011	-2.26517	0.0235022	0.138032	coding	protein_coding	ENSG00000086475	SEPHS1	307.026	347.293	417.173	255.365	299.438	291.567	355.244	323.861	326.613	280.474	280.302	298.829	317.41	412.92	308.785
ENSG00000086504	146.252	0.212395	0.190407	1.11549	0.264639	0.585327	coding	protein_coding	ENSG00000086504	MRPL28	142.435	83.8664	173.318	186.347	123.666	178.241	145.844	185.064	124.675	137.328	173.382	129.293	135.343	145.589	129.385
ENSG00000086506	2.90245	0.052354	0.134351	0.4721	0.636855		coding	protein_coding	ENSG00000086506	HBQ1	1.72648	3.22563	0	0	1.3895	6.60152	4.01405	9.07174	7.02395	0	0	4.28121	4.02805	0	2.17455
ENSG00000086544	35.8358	-0.134658	0.208696	-0.636904	0.524187	0.800999	coding	protein_coding	ENSG00000086544	ITPKC	34.2419	43.0084	43.3296	40.2602	39.6008	23.1053	39.4715	32.6583	40.3877	30.2586	37.5662	24.831	33.03	30.1218	45.6655
ENSG00000086548	1084.39	0.246593	0.0850933	2.8975	0.00376146	0.0367434	coding	protein_coding	ENSG00000086548	CEACAM6	1016.03	894.575	980.458	1227.36	1194.97	1037.54	1230.31	1095.87	1164.22	1125.39	996.949	994.097	1120.6	1129.57	1057.92
ENSG00000086570	0.611108	0.0546289	0.0514559	0.681139	0.495783		coding	protein_coding	ENSG00000086570	FAT2	0.575494	0	0	4.60117	0	1.10025	0	0	0	0	2.88971	0	0	0	0
ENSG00000086589	199.468	0.166258	0.156137	1.06601	0.286421	0.608505	coding	protein_coding	ENSG00000086589	RBM22	194.229	169.883	234.786	245.012	229.962	209.048	196.02	189.599	182.623	259.526	158.934	227.76	168.373	195.792	130.473
ENSG00000086598	1434.74	0.0491826	0.063046	0.78086	0.434885	0.736695	coding	protein_coding	ENSG00000086598	TMED2	1485.35	1456.91	1438.95	1574.75	1514.56	1452.33	1400.24	1347.15	1376.69	1384.91	1465.08	1367.42	1305.09	1478.48	1473.25
ENSG00000086619	24.5599	-0.21328	0.224162	-0.931183	0.351759	0.670811	coding	protein_coding	ENSG00000086619	ERO1LB	19.5668	45.1588	30.23	19.555	27.79	23.1053	20.7393	21.7722	22.8278	25.6034	14.4485	23.9748	25.7795	16.316	31.5309
ENSG00000086666	245.445	0.239992	0.12395	1.93688	0.05276	0.236108	coding	protein_coding	ENSG00000086666	ZFAND6	221.278	252.675	201.533	280.671	245.247	284.965	210.069	259.452	252.862	219.957	231.177	253.448	233.627	258.545	276.167
ENSG00000086696	0.1034	0.0105724	0.0419945	0.300687	0.763653		coding	protein_coding	ENSG00000086696	HSD17B2	0	0	0	0	0.694751	0	0	0	0	0	0	0.856242	0	0	0
ENSG00000086712	182.966	-0.187004	0.121676	-1.54197	0.123082	0.390831	coding	protein_coding	ENSG00000086712	TXLNG	175.238	175.259	210.602	162.191	168.13	151.835	182.639	182.342	201.938	182.715	193.61	178.955	181.262	185.751	212.018
ENSG00000086717	6.81118	-0.093717	0.19963	-0.653854	0.513206	0.792534	coding	protein_coding	ENSG00000086717	PPEF1	4.31621	5.37605	5.03833	1.15029	4.1685	4.40101	7.3591	13.6076	5.26796	5.81896	2.88971	2.56873	9.66732	25.1015	5.43636
ENSG00000086730	3.35248	0.079598	0.146752	0.575345	0.565058		coding	protein_coding	ENSG00000086730	LAT2	2.30198	0	4.03066	4.60117	2.779	3.30076	0.669009	2.72152	0	3.49138	14.4485	1.71248	8.0561	0	2.17455
ENSG00000086758	3212.69	-0.124778	0.0971938	-1.28352	0.199309	0.511029	coding	protein_coding	ENSG00000086758	HUWE1	3842	3220.26	3252.74	3167.9	3205.58	3055.4	3241.35	3298.48	3246.82	3200.43	2577.62	3398.43	2934.84	3471.54	3076.98
ENSG00000086827	91.3183	-0.323621	0.167541	-1.92699	0.0539811	0.239461	coding	protein_coding	ENSG00000086827	ZW10	104.74	109.671	102.782	85.1216	81.2858	75.9174	92.3232	77.1098	66.7275	73.3189	83.8015	113.88	97.4788	90.3654	115.251
ENSG00000086848	111.206	-0.0775248	0.199193	-0.386103	0.699421	0.896021	coding	protein_coding	ENSG00000086848	ALG9	133.802	120.424	104.797	124.232	125.75	84.7194	107.041	113.397	77.2634	109.396	52.0147	139.567	104.729	148.099	122.862
ENSG00000086967	0						coding	protein_coding	ENSG00000086967	MYBPC2	0	0	0	0	0	0	0	0	0	0	0	0	0	0	0
ENSG00000086991	0						coding	protein_coding	ENSG00000086991	NOX4	0	0	0	0	0	0	0	0	0	0	0	0	0	0	0
ENSG00000087008	43.1786	-0.432988	0.224601	-1.92895	0.0537376	0.238903	coding	protein_coding	ENSG00000087008	ACOX3	41.1478	70.9639	50.3833	33.3585	34.7375	25.3058	35.4575	32.6583	42.1437	38.4051	106.919	31.681	42.6973	31.3769	30.4436
ENSG00000087053	199.404	-0.360621	0.14154	-2.54316	0.0109855	0.0807866	coding	protein_coding	ENSG00000087053	MTMR2	222.716	207.516	277.108	167.943	195.225	167.238	174.611	200.485	200.182	173.405	173.382	232.042	198.18	185.751	215.28
ENSG00000087074	365.598	0.250815	0.103993	2.41404	0.0157769	0.104006	coding	protein_coding	ENSG00000087074	PPP1R15A	357.67	346.218	368.805	394.55	402.955	495.114	377.321	359.241	398.609	292.112	329.427	323.66	375.414	322.554	340.316
ENSG00000087076	3.65127	0.152978	0.184975	0.686203	0.492585		coding	protein_coding	ENSG00000087076	HSD17B14	4.31621	2.15042	9.06899	8.05204	6.94751	7.70177	0.669009	2.72152	3.51197	1.16379	0	3.42497	1.61122	1.25508	2.17455
ENSG00000087077	96.811	0.159623	0.154707	1.0324	0.301883	0.623515	coding	protein_coding	ENSG00000087077	TRIP6	93.2301	89.2425	87.6669	95.4742	88.9281	126.529	87.6401	87.0887	82.5314	87.2844	118.478	99.3241	100.701	100.406	107.64
ENSG00000087085	2.29323	0.145923	0.150194	1.12033	0.262574		coding	protein_coding	ENSG00000087085	ACHE	0.575494	2.15042	1.00767	5.75146	2.08425	1.10025	3.34504	3.6287	1.75599	4.65517	0	1.71248	1.61122	5.0203	0
ENSG00000087086	10803.7	0.139712	0.0586516	2.3821	0.017214	0.110958	coding	protein_coding	ENSG00000087086	FTL	10132.7	10284.4	10983.5	11284.4	11309.8	12051.1	9979.6	10672.9	10908.2	10383.4	10767.1	10942.8	10088.7	11077.3	11190.2
ENSG00000087087	424.457	-0.311527	0.199572	-1.5652	0.117536	0.381139	coding	protein_coding	ENSG00000087087	SRRT	422.125	647.277	352.683	429.059	352.933	276.163	421.475	450.866	568.94	456.207	231.177	441.821	315.799	504.54	495.796
ENSG00000087088	201.527	-0.111066	0.138111	-0.804664	0.421014	0.726815	coding	protein_coding	ENSG00000087088	BAX	193.942	225.794	204.556	169.093	220.236	176.04	201.372	183.249	259.886	178.06	199.39	177.242	215.098	222.148	196.796
ENSG00000087095	110.274	0.142412	0.16261	0.876748	0.380623	0.695079	coding	protein_coding	ENSG00000087095	NLK	101.575	131.176	86.6592	117.33	127.139	111.126	103.696	81.6457	96.5792	110.56	101.14	142.136	110.369	124.252	108.727
ENSG00000087111	181.001	0.0879805	0.160465	0.544172	0.586323	0.837679	coding	protein_coding	ENSG00000087111	PIGS	162.577	141.928	167.272	192.099	164.656	151.835	186.653	151.498	215.986	203.664	234.066	180.667	168.373	155.629	238.113
ENSG00000087116	0.0775862	0	0.0419558	0	1		coding	protein_coding	ENSG00000087116	ADAMTS2	0	0	0	0	0	0	0	0	0	1.16379	0	0	0	0	0
ENSG00000087128	0						coding	protein_coding	ENSG00000087128	TMPRSS11E	0	0	0	0	0	0	0	0	0	0	0	0	0	0	0
ENSG00000087152	256.519	0.22955	0.138601	1.65479	0.0979661	0.343038	coding	protein_coding	ENSG00000087152	ATXN7L3	247.462	244.073	176.341	301.377	268.869	233.254	228.801	245.844	279.202	278.146	277.412	281.704	258.601	296.198	230.502
ENSG00000087157	57.1543	0.20427	0.200153	1.01554	0.309849	0.6313	coding	protein_coding	ENSG00000087157	PGS1	49.4925	43.0084	42.3219	57.5146	49.3273	59.4136	62.2178	55.3376	47.4116	58.1896	106.919	55.6557	62.8376	65.2639	42.4036
ENSG00000087191	625.497	-0.0814951	0.0841087	-0.968383	0.332853	0.654392	coding	protein_coding	ENSG00000087191	PSMC5	617.217	649.427	695.289	587.799	623.886	629.344	664.326	628.672	635.667	587.715	557.714	522.308	677.518	599.926	705.64
ENSG00000087206	148.25	-0.110948	0.207241	-0.549396	0.582734	0.836233	coding	protein_coding	ENSG00000087206	UIMC1	144.737	133.326	124.95	157.59	100.044	104.524	115.069	214.093	87.7993	187.371	135.816	146.417	207.847	227.169	136.996
ENSG00000087237	0						coding	protein_coding	ENSG00000087237	CETP	0	0	0	0	0	0	0	0	0	0	0	0	0	0	0
ENSG00000087245	46.0654	0.068271	0.224986	0.30678	0.759011	0.921581	coding	protein_coding	ENSG00000087245	MMP2	47.766	31.1811	40.3066	37.9596	47.243	48.4111	99.0133	26.308	31.6078	93.1034	43.3456	25.6873	41.0861	30.1218	47.84
ENSG00000087250	0.31877	0.0108969	0.045645	0.325864	0.744527		coding	protein_coding	ENSG00000087250	MT3	0	0	0	1.15029	0	0	0	0	0	1.16379	0	0.856242	1.61122	0	0
ENSG00000087253	70.4806	-0.0834953	0.223375	-0.378213	0.705273	0.898059	coding	protein_coding	ENSG00000087253	LPCAT2	64.4553	77.4152	73.5596	77.0696	61.1381	56.1129	77.605	54.4304	80.7754	95.431	34.6765	57.3682	140.176	60.2436	46.7527
ENSG00000087258	2.25615	0.242995	0.130748	1.90277	0.057071		coding	protein_coding	ENSG00000087258	GNAO1	0.575494	1.07521	0	1.15029	10.4213	1.10025	3.34504	0	5.26796	2.32758	5.77942	1.71248	0	0	1.08727
ENSG00000087263	264.853	-0.0608091	0.204816	-0.296071	0.767176	0.924135	coding	protein_coding	ENSG00000087263	OGFOD1	281.417	260.201	285.169	326.683	254.279	199.146	263.589	269.431	198.426	211.81	511.478	194.367	253.767	251.015	212.018
ENSG00000087266	37.1015	-0.206966	0.21961	-1.13934	0.254561	0.574662	coding	protein_coding	ENSG00000087266	SH3BP2	24.1708	32.2563	31.2376	23.0058	17.3688	14.3033	22.0773	28.1224	122.919	17.4569	52.0147	61.6494	38.6693	28.8667	42.4036
ENSG00000087269	239.79	-0.211502	0.119986	-1.76365	0.0777911	0.297937	coding	protein_coding	ENSG00000087269	NOP14	235.665	262.351	271.062	224.307	218.846	207.948	242.85	271.245	275.69	228.103	210.949	219.198	204.625	276.117	247.898
ENSG00000087274	540.387	-0.108375	0.125942	-0.858986	0.390348	0.702459	coding	protein_coding	ENSG00000087274	ADD1	624.123	529.004	593.515	537.186	616.244	455.505	452.919	499.853	537.332	410.819	586.611	515.458	615.486	552.233	579.516
ENSG00000087299	72.4055	-0.223779	0.215725	-1.06233	0.288088	0.610383	coding	protein_coding	ENSG00000087299	L2HGDH	89.2016	63.4374	60.4599	65.5666	38.906	66.0152	63.5558	51.7089	108.871	80.3017	31.7868	60.7932	96.6732	114.212	94.5927
ENSG00000087301	15.9072	0.126698	0.224269	0.563772	0.57291	0.830979	coding	protein_coding	ENSG00000087301	TXNDC16	16.9771	15.0529	8.06132	11.5029	13.895	25.3058	10.7041	34.4726	17.5599	13.9655	14.4485	14.5561	14.501	11.2957	16.3091
ENSG00000087302	293.123	0.0301059	0.117794	0.255725	0.798163	0.937291	coding	protein_coding	ENSG00000087302	C14orf166	274.223	308.585	287.185	273.77	286.932	325.675	307.075	316.604	272.178	276.983	369.883	292.835	246.517	297.453	260.945
ENSG00000087303	260.735	0.576751	0.176302	3.26021	0.00111331	0.0140155	coding	protein_coding	ENSG00000087303	NID2	201.998	203.215	275.093	366.943	273.732	468.708	211.407	301.182	295.006	259.526	176.272	253.448	217.515	222.148	184.836
ENSG00000087338	76.1194	-0.138524	0.183944	-0.75927	0.447691	0.745731	coding	protein_coding	ENSG00000087338	GMCL1	65.8941	82.7912	79.6055	79.3702	54.8853	67.1154	40.1405	69.8524	47.4116	64.0086	66.4633	65.9307	110.369	130.528	117.425
ENSG00000087365	822.155	-0.144932	0.115559	-1.25469	0.209591	0.524181	coding	protein_coding	ENSG00000087365	SF3B2	812.022	810.709	935.113	885.725	679.466	732.768	842.282	720.296	879.749	706.422	898.699	786.887	822.528	956.367	863.295
ENSG00000087448	254.882	-0.195469	0.156919	-1.24215	0.214183	0.530061	coding	protein_coding	ENSG00000087448	KLHL42	268.468	291.382	314.392	219.706	316.806	203.547	274.963	256.73	256.374	239.741	161.824	228.617	287.603	217.128	285.953
ENSG00000087460	2060.38	0.113036	0.0849162	1.33119	0.183125	0.486023	coding	protein_coding	ENSG00000087460	GNAS	2004.16	1969.79	2008.28	1998.06	2300.32	2186.2	1879.91	2086.5	2003.58	2001.72	2355.11	1899.15	1991.47	1972.98	2248.48
ENSG00000087470	419.433	-0.300232	0.134674	-2.22718	0.0259353	0.14798	coding	protein_coding	ENSG00000087470	DNM1L	435.937	553.734	472.595	340.486	430.051	382.888	440.208	366.498	403.877	541.163	358.324	417.846	360.108	402.879	384.895
ENSG00000087494	83.6026	0.00185676	0.192191	0.012307	0.990181	0.997286	coding	protein_coding	ENSG00000087494	PTHLH	89.2016	81.716	87.6669	85.1216	82.6753	92.4212	104.365	75.2954	86.0433	96.5948	78.0221	55.6557	91.0339	51.4581	96.7673
ENSG00000087495	0.0829669	-0.0077184	0.0420033	-0.164938	0.868993		coding	protein_coding	ENSG00000087495	PHACTR3	0.575494	0	0	0	0	0	0.669009	0	0	0	0	0	0	0	0
ENSG00000087502	208.929	-0.942942	0.180872	-5.20555	1.93421e-07	7.70055e-06	coding	protein_coding	ENSG00000087502	ERGIC2	291.776	344.067	255.947	126.532	144.508	121.028	209.4	119.747	172.087	195.517	309.199	196.079	244.905	225.914	177.225
ENSG00000087510	70.6969	-0.0147828	0.170913	-0.0701196	0.944098	0.987908	coding	protein_coding	ENSG00000087510	TFAP2C	73.951	95.6938	78.5979	92.0234	75.7278	75.9174	55.5277	60.7807	75.5074	52.3707	57.7942	71.0681	67.6713	61.4987	66.3236
ENSG00000087586	513.801	-0.246173	0.111411	-2.20615	0.0273732	0.153716	coding	protein_coding	ENSG00000087586	AURKA	624.411	637.6	526.001	529.134	503.694	459.906	521.827	468.102	475.872	423.62	439.236	497.477	522.035	468.143	609.96
ENSG00000087589	0						coding	protein_coding	ENSG00000087589	CASS4	0	0	0	0	0	0	0	0	0	0	0	0	0	0	0
ENSG00000087842	120.834	-0.363617	0.181245	-2.01046	0.0443826	0.211538	coding	protein_coding	ENSG00000087842	PIR	144.449	111.822	139.058	86.2719	115.329	85.8197	122.429	70.7596	110.627	122.198	170.493	127.58	116.813	151.864	136.996
ENSG00000087884	22.1573	-0.0168353	0.224341	-0.0772043	0.938461	0.985814	coding	protein_coding	ENSG00000087884	AAMDC	22.4443	26.8803	17.1303	21.8555	25.011	17.604	21.4083	29.0296	14.0479	20.9483	20.228	22.2623	13.6954	32.632	27.1818
ENSG00000087903	34.7799	-0.173092	0.201637	-1.1328	0.257299	0.57827	coding	protein_coding	ENSG00000087903	RFX2	18.4158	20.429	43.3296	19.555	18.7583	6.60152	35.4575	37.1941	43.8997	20.9483	101.14	9.41867	11.2785	76.5596	58.7127
ENSG00000087916	0.991631	-0.0266931	0.101309	-0.299069	0.764887		coding	protein_coding	ENSG00000087916	SLC6A14	0	2.15042	1.00767	0	0.694751	1.10025	0.669009	0.907174	3.51197	0	2.88971	0.856242	0	0	1.08727
ENSG00000087995	83.7797	-0.0219634	0.178031	-0.124529	0.900896	0.972317	coding	protein_coding	ENSG00000087995	METTL2A	73.0878	91.3929	88.6745	75.9193	91.7071	75.9174	86.9711	81.6457	47.4116	97.7586	101.14	79.6305	80.561	97.8959	86.9818
ENSG00000088002	39.9521	-0.41043	0.210018	-1.94845	0.0513615	0.232707	coding	protein_coding	ENSG00000088002	SULT2B1	42.2988	67.7383	41.3143	37.9596	29.1795	31.9073	42.1475	40.8228	31.6078	50.0431	23.1177	35.9622	42.6973	47.6929	34.7927
ENSG00000088035	32.8244	-0.136846	0.223869	-0.600224	0.548357	0.814663	coding	protein_coding	ENSG00000088035	ALG6	29.9257	35.482	47.3603	31.0579	37.5165	25.3058	11.3731	36.287	15.8039	50.0431	46.2353	33.3934	35.4468	28.8667	28.2691
ENSG00000088038	279.656	-0.328244	0.113067	-2.89492	0.00379254	0.0369931	coding	protein_coding	ENSG00000088038	CNOT3	364	307.51	331.522	248.463	273.732	268.462	289.012	251.287	251.106	263.017	202.28	241.46	290.825	284.902	327.269
ENSG00000088053	1.44057	-0.0583301	0.109969	-0.52335	0.600731		coding	protein_coding	ENSG00000088053	GP6	2.87747	1.07521	2.01533	3.45088	0	0	2.67603	0	0	3.49138	0	1.71248	3.22244	0	1.08727
ENSG00000088179	101.854	0.114763	0.22545	0.49017	0.624014	0.859956	coding	protein_coding	ENSG00000088179	PTPN4	56.1107	119.348	148.127	59.8152	73.6436	247.557	63.5558	78.017	64.9715	110.56	141.596	46.2371	124.87	80.3248	113.076
ENSG00000088205	395.654	-0.0932786	0.118947	-0.781258	0.434651	0.73648	coding	protein_coding	ENSG00000088205	DDX18	418.384	438.686	459.495	431.36	387.671	408.194	408.764	341.097	323.101	410.819	404.559	342.497	346.412	361.462	452.305
ENSG00000088247	716.172	0.0715822	0.109109	0.656413	0.511558	0.791695	coding	protein_coding	ENSG00000088247	KHSRP	721.094	694.586	703.35	766.095	669.045	805.385	641.579	713.946	769.122	573.75	757.103	679.856	839.446	692.801	715.425
ENSG00000088256	338.71	-0.204813	0.0993303	-2.06122	0.0392821	0.195284	coding	protein_coding	ENSG00000088256	GNA11	350.476	389.226	358.729	291.024	336.954	309.171	335.842	364.684	391.585	302.586	306.309	333.078	319.827	355.186	335.967
ENSG00000088280	13.4233	-0.219892	0.180995	-1.18724	0.235135	0.554878	coding	protein_coding	ENSG00000088280	ASAP3	11.5099	6.45126	41.3143	6.90175	15.9793	4.40101	7.3591	4.53587	24.5838	13.9655	0	11.1311	4.02805	26.3566	22.8327
ENSG00000088298	188.063	0.117589	0.114791	1.03084	0.302615	0.623976	coding	protein_coding	ENSG00000088298	EDEM2	206.602	186.011	190.449	222.006	212.594	207.948	194.013	189.599	200.182	179.224	156.044	147.274	179.651	189.516	159.829
ENSG00000088305	94.4993	-1.66837	0.169427	-9.62416	6.32213e-22	1.76189e-19	coding	protein_coding	ENSG00000088305	DNMT3B	171.21	177.41	132.004	34.5088	43.7693	38.5088	76.936	88.9031	77.2634	59.3534	66.4633	71.9244	110.369	140.568	128.298
ENSG00000088320	0.0836717	0	0.0419558	0	1		coding	protein_coding	ENSG00000088320	REM1	0	0	0	0	0	0	0	0	0	0	0	0	0	1.25508	0
ENSG00000088325	1158.67	-0.309262	0.0832623	-3.71289	0.000204904	0.00343836	coding	protein_coding	ENSG00000088325	TPX2	1426.65	1201.01	1338.18	1001.9	1117.85	1061.74	1102.53	1143.04	960.525	1104.44	1083.64	1120.82	1188.27	1231.23	1298.2
ENSG00000088340	11.0173	0.298634	0.20656	1.49223	0.135638	0.412987	pseudo	pseudogene	ENSG00000088340	FER1L4	9.7834	4.30084	5.03833	23.0058	5.55801	14.3033	16.7252	8.16457	7.02395	9.31034	2.88971	6.84994	8.0561	13.8058	30.4436
ENSG00000088356	54.7116	-0.181087	0.189437	-0.969361	0.332365	0.653882	coding	protein_coding	ENSG00000088356	PDRG1	55.8229	46.2341	63.4829	47.162	47.243	46.2106	60.8798	55.3376	75.5074	53.5345	46.2353	53.087	70.8937	41.4175	57.6255
ENSG00000088367	864.047	-0.212212	0.120862	-1.75591	0.0791042	0.301	coding	protein_coding	ENSG00000088367	EPB41L1	963.665	891.35	934.106	752.291	721.846	908.809	788.761	1065.02	848.141	886.81	661.743	820.28	892.616	957.622	867.644
ENSG00000088386	3.21945	0.0467442	0.172098	0.273148	0.78474		coding	protein_coding	ENSG00000088386	SLC15A1	1.72648	1.07521	3.023	2.30058	0.694751	4.40101	4.01405	5.44304	3.51197	2.32758	0	1.71248	2.41683	11.2957	4.34909
ENSG00000088387	321.279	-0.174689	0.205068	-0.839099	0.401414	0.710143	coding	protein_coding	ENSG00000088387	DOCK9	541.828	353.744	295.246	197.85	423.798	387.289	254.223	281.224	395.097	322.37	182.052	231.185	358.497	301.218	293.564
ENSG00000088448	138.403	-0.396199	0.225213	-1.70127	0.0888917	0.324144	coding	protein_coding	ENSG00000088448	ANKRD10	94.381	387.076	138.05	88.5725	113.244	178.241	95.6682	150.591	84.2873	122.198	144.485	141.28	124.064	111.702	102.204
ENSG00000088451	25.7225	0.32515	0.218614	1.47758	0.139521	0.420022	coding	protein_coding	ENSG00000088451	TGDS	27.6237	25.8051	15.115	26.4567	36.8218	36.3083	27.4294	26.308	19.3158	26.7672	14.4485	22.2623	20.9459	27.6117	32.6182
ENSG00000088538	49.2338	-0.0773465	0.194746	-0.396465	0.691762	0.891843	coding	protein_coding	ENSG00000088538	DOCK3	58.7004	47.3093	44.3373	40.2602	40.9903	62.7144	50.1757	57.152	40.3877	46.5517	54.9044	47.0933	51.559	53.9682	42.4036
ENSG00000088543	12.9437	0.0412715	0.225717	0.196047	0.844573	0.953319	coding	protein_coding	ENSG00000088543	C3orf18	13.2364	19.3538	13.0996	16.1041	20.1478	11.0025	9.36612	13.6076	10.5359	4.65517	5.77942	4.28121	14.501	27.6117	10.8727
ENSG00000088682	185.814	-0.411978	0.139333	-2.94937	0.00318417	0.0322801	coding	protein_coding	ENSG00000088682	COQ9	215.81	206.44	253.932	188.648	145.203	159.537	163.238	133.355	172.087	176.896	144.485	167.823	196.569	219.638	243.549
ENSG00000088726	0.217636	-0.00663418	0.0420587	-0.164941	0.86899		coding	protein_coding	ENSG00000088726	TMEM40	0.575494	0	0	0	0	0	0.669009	0	0	1.16379	0	0.856242	0	0	0
ENSG00000088727	19.8819	-0.0976049	0.226255	-0.465721	0.641415	0.868149	coding	protein_coding	ENSG00000088727	KIF9	19.8545	18.2786	16.1226	12.6532	16.674	17.604	21.4083	23.5865	49.1676	15.1293	11.5588	33.3934	16.1122	12.5508	14.1345
ENSG00000088756	4.18589	-0.147437	0.192995	-0.771411	0.440463		coding	protein_coding	ENSG00000088756	ARHGAP28	7.76917	4.30084	2.01533	2.30058	4.86325	2.20051	6.69009	5.44304	5.26796	3.49138	0	1.71248	6.44488	3.76523	6.52364
ENSG00000088766	182.552	0.269865	0.163937	1.6465	0.0996603	0.347174	coding	protein_coding	ENSG00000088766	CRLS1	189.913	187.087	176.341	266.868	172.298	256.359	126.443	187.785	124.675	165.259	167.603	196.079	159.511	187.006	175.051
ENSG00000088782	0						coding	protein_coding	ENSG00000088782	DEFB127	0	0	0	0	0	0	0	0	0	0	0	0	0	0	0
ENSG00000088808	88.6359	0.315851	0.225193	1.3985	0.161964	0.456473	coding	protein_coding	ENSG00000088808	PPP1R13B	94.0933	48.3845	73.5596	81.6707	170.214	70.4162	88.3091	91.6246	70.2395	138.491	43.3456	108.743	87.8115	110.447	52.1891
ENSG00000088812	476.627	-0.115808	0.114647	-1.00793	0.313489	0.635445	coding	protein_coding	ENSG00000088812	ATRN	546.144	520.402	503.833	519.932	500.22	422.497	508.447	419.114	463.58	450.388	364.103	502.614	438.252	483.204	506.669
ENSG00000088826	664.79	0.973583	0.0956411	10.175	2.56359e-24	9.10909e-22	coding	protein_coding	ENSG00000088826	SMOX	481.113	435.46	382.913	897.228	885.807	878.002	731.226	683.102	716.442	593.534	710.868	612.213	714.576	618.752	630.618
ENSG00000088827	0.0637837	-0.00285532	0.0419823	-0.0700194	0.944178		coding	protein_coding	ENSG00000088827	SIGLEC1	0.287747	0	0	0	0	0	0.669009	0	0	0	0	0	0	0	0
ENSG00000088832	1087.03	0.121046	0.117158	1.03342	0.301407	0.623113	coding	protein_coding	ENSG00000088832	FKBP1A	1154.44	969.84	1170.91	1072.07	1292.93	1243.29	1048.34	1112.2	814.778	1095.13	1054.74	1163.63	1046.49	917.46	1149.25
ENSG00000088833	406.624	0.0823327	0.134819	0.610853	0.541297	0.810519	coding	protein_coding	ENSG00000088833	NSFL1C	415.219	403.204	372.836	461.267	421.019	389.489	473.658	407.321	284.47	398.017	326.537	355.341	438.252	465.633	487.098
ENSG00000088836	22.5639	-0.242436	0.206843	-1.22739	0.219675	0.537299	coding	protein_coding	ENSG00000088836	SLC4A11	27.0482	23.6546	25.1916	10.3526	11.8108	19.8045	23.4153	12.7004	5.26796	9.31034	106.919	18.8373	13.6954	16.316	14.1345
ENSG00000088854	61.956	-0.302987	0.182715	-1.63794	0.101434	0.350433	coding	protein_coding	ENSG00000088854	C20orf194	74.2387	63.4374	89.6822	67.8672	48.6325	60.5139	59.5418	53.5233	61.4595	72.1551	63.5736	47.9496	55.5871	58.9885	52.1891
ENSG00000088876	107.274	-0.368372	0.192177	-1.91524	0.0554615	0.243145	coding	protein_coding	ENSG00000088876	ZNF343	138.119	108.596	133.012	127.682	68.7803	79.2182	104.365	96.1605	108.871	138.491	66.4633	117.305	111.98	115.467	94.5927
ENSG00000088881	14.4727	0.0719588	0.223959	0.321372	0.747928	0.915932	coding	protein_coding	ENSG00000088881	EBF4	11.5099	13.9777	11.0843	8.05204	21.5373	9.90227	25.4223	21.7722	10.5359	17.4569	8.66912	14.5561	12.0842	8.78553	21.7455
ENSG00000088882	0.215042	-0.023168	0.0420329	-0.542167	0.587704		coding	protein_coding	ENSG00000088882	CPXM1	0	3.22563	0	0	0	0	0	0	0	0	0	0	0	0	0
ENSG00000088888	334.404	-0.198154	0.0964606	-2.05053	0.040313	0.198328	coding	protein_coding	ENSG00000088888	MAVS	388.459	362.346	359.736	316.33	327.922	321.274	328.483	330.211	388.073	334.008	306.309	326.228	331.911	284.902	309.873
ENSG00000088899	17.7464	-0.0252682	0.226196	-0.114074	0.909179	0.97478	coding	protein_coding	ENSG00000088899	LZTS3	12.3731	26.8803	15.115	17.2544	16.674	16.5038	14.0492	16.3291	29.8518	9.31034	14.4485	13.6999	24.9739	21.3363	17.3964
ENSG00000088926	0.0537073	0	0.0419558	0	1		coding	protein_coding	ENSG00000088926	F11	0	0	0	0	0	0	0	0	0	0	0	0	0.80561	0	0
ENSG00000088930	925.531	-0.0486354	0.0746586	-0.650201	0.515562	0.794157	coding	protein_coding	ENSG00000088930	XRN2	985.821	932.208	1022.78	916.783	983.072	938.515	885.767	928.039	791.95	886.81	930.486	904.192	861.197	956.367	958.975
ENSG00000088970	53.8256	0.115949	0.216091	0.536346	0.59172	0.840927	other	processed_transcript	ENSG00000088970	PLK1S1	53.8087	70.9639	31.2376	58.6649	64.6118	52.8121	44.1546	37.1941	71.9954	60.5172	89.5809	58.2245	41.0861	46.4378	26.0945
ENSG00000088986	616.788	0.135923	0.0802018	1.69491	0.0900934	0.326739	coding	protein_coding	ENSG00000088986	DYNLL1	578.084	606.419	579.407	669.47	614.854	661.252	608.798	635.022	542.6	591.207	664.633	624.201	598.568	616.242	661.062
ENSG00000088992	81.6417	0.274175	0.168556	1.62636	0.103873	0.355488	coding	protein_coding	ENSG00000088992	TESC	71.0735	69.8887	75.5749	80.5204	97.2651	92.4212	85.6331	80.7385	59.7035	97.7586	104.029	75.3493	91.0339	74.0494	69.5855
ENSG00000089006	793.192	-0.331859	0.102794	-3.23007	0.0012376	0.0152558	coding	protein_coding	ENSG00000089006	SNX5	859.213	880.598	808.147	713.181	628.749	659.051	750.628	875.423	860.433	692.456	832.236	760.343	735.522	927.501	914.396
ENSG00000089009	2819.22	0.135818	0.0678882	2.0007	0.045425	0.214565	coding	protein_coding	ENSG00000089009	RPL6	2561.81	2657.92	2867.81	3111.54	2774.14	3016.89	2688.08	2650.76	2598.86	2844.31	3193.13	2790.49	2749.55	2852.79	2930.2
ENSG00000089012	0						coding	protein_coding	ENSG00000089012	SIRPG	0	0	0	0	0	0	0	0	0	0	0	0	0	0	0
ENSG00000089022	197.549	0.01058	0.173701	0.0563175	0.955089	0.990538	coding	protein_coding	ENSG00000089022	MAPKAPK5	182.432	152.68	187.426	190.948	193.141	143.033	174.611	175.085	261.642	210.646	280.302	249.167	174.817	148.099	239.2
ENSG00000089041	0						coding	protein_coding	ENSG00000089041	P2RX7	0	0	0	0	0	0	0	0	0	0	0	0	0	0	0
ENSG00000089048	128.938	0.0157119	0.208547	0.0727273	0.942023	0.987168	coding	protein_coding	ENSG00000089048	ESF1	71.649	150.529	115.881	102.376	76.4226	161.737	135.14	107.954	142.235	194.353	150.265	154.98	151.455	101.661	117.425
ENSG00000089050	121.521	-0.36505	0.200509	-1.82134	0.0685545	0.276339	coding	protein_coding	ENSG00000089050	RBBP9	151.93	140.853	125.958	81.6707	131.308	81.4187	94.9992	106.139	136.967	97.7586	106.919	135.286	146.621	90.3654	194.622
ENSG00000089053	466.647	-0.0816183	0.169978	-0.479791	0.631376	0.862974	coding	protein_coding	ENSG00000089053	ANAPC5	523.124	436.536	496.779	392.25	466.872	502.815	393.377	597.828	409.145	455.043	366.993	404.146	352.857	597.416	604.524
ENSG00000089057	466.737	-0.697387	0.160907	-4.33891	1.43191e-05	0.00035333	coding	protein_coding	ENSG00000089057	SLC23A2	620.095	553.734	538.093	387.648	327.922	255.259	424.821	481.709	609.327	339.827	505.699	327.941	619.514	532.152	477.313
ENSG00000089060	39.1142	0.208904	0.225088	0.924076	0.355447	0.674086	coding	protein_coding	ENSG00000089060	SLC8B1	31.9399	49.4597	25.1916	34.5088	59.7486	41.8096	32.7814	41.73	63.2155	53.5345	20.228	30.8247	47.531	31.3769	22.8327
ENSG00000089063	392.37	0.207441	0.101221	2.0495	0.0404129	0.19861	coding	protein_coding	ENSG00000089063	TMEM230	385.293	323.638	382.913	403.753	417.545	457.705	382.004	420.022	382.805	413.146	413.228	386.165	395.555	389.073	332.705
ENSG00000089091	23.2317	-0.102416	0.224182	-0.505442	0.613248	0.855125	coding	protein_coding	ENSG00000089091	DZANK1	16.1138	15.0529	29.2223	14.9538	15.9793	18.7043	23.4153	55.3376	12.2919	19.7845	52.0147	25.6873	13.6954	18.8261	17.3964
ENSG00000089094	161.738	0.326929	0.166062	1.9703	0.0488037	0.224397	coding	protein_coding	ENSG00000089094	KDM2B	124.019	126.875	150.142	141.486	174.382	206.847	143.168	176.899	136.967	144.31	216.728	169.536	141.787	170.69	202.233
ENSG00000089101	1.10943	-0.137466	0.0828486	-1.68542	0.0919078		coding	protein_coding	ENSG00000089101	C20orf26	0.575494	3.22563	6.04599	0	0	0	4.68306	0	0	0	0	0.856242	0	1.25508	0
ENSG00000089116	0						coding	protein_coding	ENSG00000089116	LHX5	0	0	0	0	0	0	0	0	0	0	0	0	0	0	0
ENSG00000089123	55.6562	-0.21299	0.204502	-1.06074	0.288808	0.611111	coding	protein_coding	ENSG00000089123	TASP1	54.6719	38.7076	72.5519	37.9596	56.9696	37.4086	64.8938	80.7385	50.9236	69.8275	49.125	59.0807	51.559	61.4987	48.9273
ENSG00000089127	251.679	0.921135	0.133301	6.90516	5.01465e-12	4.65838e-10	coding	protein_coding	ENSG00000089127	OAS1	174.087	143.003	181.38	312.879	352.933	348.78	331.828	250.38	261.642	275.819	205.169	274.854	220.737	213.363	228.327
ENSG00000089154	733.848	-0.161203	0.177425	-0.910231	0.3627	0.680357	coding	protein_coding	ENSG00000089154	GCN1L1	767.134	682.759	828.301	940.939	488.41	558.928	646.931	654.073	877.993	630.775	722.427	931.592	694.436	699.077	883.953
ENSG00000089157	2299.25	0.0643819	0.0724863	0.887991	0.374545	0.690366	coding	protein_coding	ENSG00000089157	RPLP0	2072.64	2219.23	2286.39	2307.49	2263.5	2306.13	2273.29	2378.61	2604.13	2179.78	2346.44	2495.09	2107.48	2313.1	2335.46
ENSG00000089159	808.232	0.484313	0.0838775	5.77406	7.73819e-09	4.08859e-07	coding	protein_coding	ENSG00000089159	PXN	717.353	760.174	697.304	1035.26	1046.99	993.528	803.479	822.807	865.701	756.465	658.853	856.242	664.628	705.352	739.345
ENSG00000089163	0.424322	-0.00940644	0.0479128	-0.183677	0.854267		coding	protein_coding	ENSG00000089163	SIRT4	0	0	1.00767	0	0	0	0	0	0	0	2.88971	0.856242	1.61122	0	0
ENSG00000089169	7.70558	0.0740419	0.209915	0.363292	0.716387	0.9025	coding	protein_coding	ENSG00000089169	RPH3A	4.02846	8.60169	3.023	8.05204	5.55801	4.40101	8.69711	8.16457	14.0479	18.6207	5.77942	5.13745	7.25049	8.78553	5.43636
ENSG00000089177	135.201	-0.13713	0.13351	-1.01856	0.308412	0.629718	coding	protein_coding	ENSG00000089177	KIF16B	145.025	161.282	152.157	134.584	133.392	143.033	139.823	133.355	114.139	115.215	150.265	127.58	123.258	141.823	113.076
ENSG00000089195	250.878	-0.0965214	0.104812	-0.916376	0.35947	0.677875	coding	protein_coding	ENSG00000089195	TRMT6	263.289	268.803	294.238	249.613	275.121	237.655	278.308	254.009	251.106	203.664	222.507	228.617	250.545	249.76	235.938
[truncated: 55,599 more rows]
